# Supplementary material
Source: publisher figshare collection journal article supplement (https://gsajournals.figshare.com/articles/dataset/_/19782502)
Supplement: Supplementary file 1 [file 1]

## Sheet: Human Proteome_all features
Table S2. Protein features of the human proteome.
UniprotID	GRAVY	DISOPRED3	PaxDB	CamSol	Length	Phosphosite	Pscore	NucAcid.Binding	LCRs	A	C	D	E	F	G	H	I	K	L	M	N	P	Q	R	S	T	V	W	Y	AIndex
A0AUZ9	-0.694225	79.94	0.244	1.83967	987	8	0.4	0	20.3647	5	1.9	4.4	7.5	2.9	3.3	3.2	3.9	8.4	11	1.9	5.3	4.9	5.9	4.7	12	5.9	4.2	1.6	2.2	75.0963
A0AV02	0.321289	24.65	0.145	-5.35971	714	4	0.91	0	19.4678	6.7	2	2.7	5.2	5.9	9.1	1.4	4.9	2.7	13.6	3.1	2.5	4.8	5.2	3.6	9.1	5.2	7.7	2	2.8	101.162
A0AV96	-0.234401	21.75	6.82	0.20138	593	15	3.26	1	20.2361	14.3	1.3	3.7	6.7	2.7	9.1	1.7	5.7	4.9	4.4	3	3.2	7.8	3.4	5.7	4.2	4	7.6	0.5	5.9	75.801
A0AVF1	-0.333394	4.51	0.741	-0.601287	554	4	-0.65	0	5.95668	8.1	2	4.9	8.1	4.9	5.1	2.2	5.1	7.2	11.7	2.9	5.2	2.3	4.7	5.2	5.4	3.1	4.9	1.1	6	87.7256
A0AVI4	0.175138	2.76	0.102	-2.46328	362	3	0.3	0	4.97238	11	5	3.3	4.7	4.1	3.6	2.8	3	1.9	11.9	1.7	1.9	5.5	4.7	6.6	6.6	7.5	8.6	2.8	2.8	94.0608
A0AVK6	-0.467359	78.43	0.589	1.21317	867	30	1.88	1	21.1073	6.8	1.3	3.2	6.8	3	5.5	2.3	4.8	7.4	8.4	1.8	4.8	9.1	3.9	4.5	12	5.9	6.5	0.3	1.5	77.2664
A0AVT1	-0.23384	7.89	63.7	-0.615968	1052	24	0.38	0	6.36882	6.8	2.2	5.6	7.3	5.1	5.1	2.9	6.4	7.2	9.8	1.7	4.1	5.3	3.8	3.4	6.7	6.7	6.2	1.1	2.4	87.7852
A0FGR8	-0.339305	25.41	19.3	0.233939	921	45	3.69	0	0	6	1	5.1	5.9	3.4	7.6	2.5	5.1	5.6	12.5	1.4	3.7	6.6	4.5	7.4	8.3	4.3	6.4	1.3	1.5	93.1488
A0FGR9	-0.283296	29.91	0.081	-0.859361	886	6	1.49	0	13.2054	4.9	2.4	5.2	6.4	4.2	6	1.9	3.8	6	13.2	1.2	3.5	7.2	3.6	6.9	6.7	6.1	7	1.7	2.1	91.614
A0JLT2	-1.01516	50.82	3.61	3.32511	244	9	2.83	0	28.2787	5.7	1.2	4.5	4.5	3.3	9	3.7	2.5	12.3	7.8	2.5	3.7	16	2.9	3.7	9	5.7	0.8	0	1.2	48.0738
A0JNW5	-0.454167	43.92	0.795	-0.203319	1464	51	0.97	0	17.418	5	1.7	6	6.7	3.6	3.8	3.3	5.7	7.1	9.9	2.4	5.3	4.6	4.8	3.5	12.1	5.8	5.6	0.8	2.4	82.2336
A0JP26	-0.775387	35.97	0.008	2.00567	581	5	5.51	0	9.29432	5.3	3.8	6.4	9.3	1.5	5.7	3.4	3.6	9.3	10.5	3.1	6	2.8	5.2	5	8.1	3.8	4.6	0.9	1.7	73.8554
A0MZ66	-0.968621	52.46	14.6	3.59999	631	36	1.52	0	25.832	4.4	1.4	4.4	14.7	1	2.7	1.7	4.6	11.1	9.5	2.1	4.6	6	6.5	4.4	8.4	5.5	6	0	0.8	76.9097
A0PG75	0.00664207	17.34	0.003	-0.549712	271	0	-0.21	0	0	5.2	4.1	5.2	4.8	6.3	7	1.1	7	4.4	10.3	1.5	5.5	7	4.8	3.3	7	5.9	5.9	1.5	2.2	89.9262
A0PJK1	0.627013	4.36	0.194	-5.76591	596	10	0.56	0	18.2886	11.1	1.8	3	2.3	4.5	8.7	1.5	7.2	1.3	12.6	3.4	2.7	4.7	3	4.2	7.2	6.4	8.2	2.7	3.4	112.131
A0PJW6	0.272772	10.89	1.97	-0.317751	202	0	0.23	0	0	9.9	2	3	1.5	6.4	10.4	2.5	1	2.5	14.9	2	1.5	7.4	3.5	8.9	4	5.9	9.4	2	1.5	98.9604
A0PJX0	-0.252432	5.41	0.315	0.770334	185	0	-0.22	0	0	4.3	3.2	8.6	8.1	8.1	3.2	3.2	4.9	3.2	11.9	5.4	4.9	3.2	3.2	5.4	8.1	3.2	3.2	1.1	3.2	79.0811
A0PJX2	-0.313488	16.28	0.072	1.23525	215	2	1.23	0	0	5.1	1.9	4.7	8.8	7.9	9.8	0.9	1.9	1.9	11.2	1.9	1.9	6	5.1	6.5	11.6	4.7	4.7	2.3	1.4	69.3953
A0PJX4	-0.0609244	52.94	2.05	-1.00401	238	7	2.3	0	5.88235	8	5.9	2.9	4.2	4.6	7.6	2.1	5	0.8	9.2	0.8	0.8	10.1	5.9	5.9	11.3	5.9	3.8	1.3	3.8	74.6639
A0PJX8	0.491254	9.62	0.063	-2.43251	343	0	-0.54	0	22.7405	7.6	2.9	2	3.5	3.2	8.7	2.3	2	0.9	22.7	1.2	1.2	5.2	6.4	5.8	8.7	4.4	7.3	1.7	2	125.364
A0PJY2	-0.447368	22.11	0.453	0.521435	475	1	0.74	1	17.0526	8.6	4.2	2.3	3.2	4.8	6.3	6.1	2.1	8.2	8.6	2.3	4.4	10.9	4.2	4	6.9	5.5	4.8	0	2.3	64.5474
A0PJZ3	-0.295034	24.38	0.295	-0.032444	443	6	0.71	0	0	8.6	1.6	3.8	4.7	5.2	5	3.4	4.3	5.4	12	2.5	3.2	9	4.3	8.4	4.5	3.2	5.2	2	3.8	87.0203
A0PK00	-0.130383	3.54	0.244	-2.97137	339	2	-1.13	0	22.7139	4.7	2.7	1.8	7.4	7.4	4.7	3.2	3.5	6.5	15.3	1.5	4.1	1.5	6.5	5.6	5.3	5	5.9	2.7	4.7	95.4572
A0PK05	0.188727	16.73	0.009	-1.9316	275	1	-0.21	0	0	8.7	2.2	3.3	5.5	5.8	6.9	2.2	4.4	5.5	14.2	1.5	0.7	6.5	4.7	2.2	8.4	8.4	5.5	1.1	2.5	96.8727
A1A4G5	-1.51685	35.96	0.495	3.60882	178	7	0.24	0	27.5281	2.8	2.8	6.2	14	4.5	3.9	6.2	1.7	8.4	5.6	2.2	0.6	5.6	2.2	13.5	12.9	1.7	2.2	1.7	1.1	37.809
A1A4S6	-0.585623	27.74	1.45	1.2631	786	11	1.83	0	0	5.9	1.4	4.7	9	5.3	5	2.7	4.6	7.8	9	2.3	4.5	6.4	4.3	5.6	8	5.3	5.2	0.9	2.2	74.0712
A1A4V9	-0.499396	33.53	0.295	1.01738	331	3	-0.29	0	0	7.6	2.4	3	11.2	3.9	3.6	3.3	2.1	6.3	13	2.1	1.8	6.6	5.1	6.6	6.3	6	5.1	0.9	2.7	81.3595
A1A519	-1.01848	62.12	0.024	2.5404	330	5	1.82	1	14.8485	3	3	3	14.8	1.8	6.7	2.7	1.5	5.5	5.5	3.3	2.7	5.5	6.4	6.4	12.1	6.7	6.7	1.2	1.5	49.5455
A1A5B4	0.0492327	9.21	0.048	-4.22209	782	4	-0.16	0	6.52174	6.6	2	3.8	6.5	6.5	4.9	2.8	5.8	4	11.3	3.2	2.7	4.6	3.7	7.2	5.5	5.5	8.1	2.2	3.2	96.3427
A1A5C7	0.315889	20.85	0.216	-4.02874	686	6	3.14	0	23.9067	9.2	3.2	3.8	3.5	5.1	10.6	2.2	6.1	3.5	13.3	2.8	3.4	6.4	2.6	4.2	6.3	4.7	5.4	1.7	2	100.437
A1A5D9	-0.9	35.83	0.941	3.68872	508	6	4.26	0	50.5906	9.6	0.2	4.5	14.2	1.6	6.5	1.2	1.2	2.8	15.6	0.8	1.4	4.7	9.6	11.2	9.4	2.6	2.6	0.4	0	82.3228
A1E959	-0.315054	26.52	0.128	0.083933	279	2	1.63	0	26.5233	6.8	0	2.5	5.4	5	6.5	0.7	5.4	2.2	11.1	2.9	3.2	11.8	14.7	1.8	7.5	5.4	3.6	0.7	2.9	81.5054
A1IGU5	-0.35837	11.11	0.584	0.291362	675	12	0.79	0	22.0741	7	1	4.3	7.6	2.8	5.2	2.2	3.4	4.7	14.2	1	3.6	5.9	7.9	6.5	6.5	4.6	7.4	1	3.1	97.2
A1KXE4	-0.297949	100	2.42	0.461552	195	12	2.9	0	40.5128	11.8	0.5	0	0	1	9.2	2.6	1.5	1	1.5	4.1	3.6	19.5	4.6	1.5	7.7	10.8	8.2	0.5	10.3	47.5897
A1KZ92	-0.364593	8.2	0.069	-0.539878	1463	5	1.4	0	0	7.6	3.1	5.2	5.5	4	6.2	3.3	4.3	3.6	9.9	1.6	4.2	6.6	5.4	7	6.5	6.3	5.9	1.4	2.4	80.2802
A1L020	-0.278846	40.96	1.14	1.0205	520	12	3.09	1	34.0385	11.5	3.1	3.3	6.7	3.1	12.3	1.3	4.2	3.3	6.3	1.2	2.3	10.2	3.5	6.7	6.7	5.6	6.2	0.4	2.1	70.6346
A1L0T0	0.183703	5.22	64.6	-1.03838	632	5	1.22	0	22.3101	11.6	1.7	4.4	4.4	3.8	9.2	2.4	3.2	3.3	12.5	1.9	2.7	5.9	4.7	6.2	4.6	4.1	10.8	1.3	1.4	103.845
A1L157	0.450198	3.16	0.084	-3.89039	253	2	-0.92	0	0	8.3	4.7	3.2	4	5.5	8.3	3.2	4.7	3.6	14.2	1.6	2	1.2	5.5	4	5.5	4.7	9.1	2	4.7	108.656
A1L167	-0.311801	0.62	0.072	0.988408	161	2	-0.73	0	0	5.6	1.2	6.2	6.8	6.2	5.6	1.2	3.1	8.1	9.9	3.1	3.1	5	3.1	5.6	8.7	5	8.1	2.5	1.9	79.8758
A1L170	-0.639338	68.75	2.775	2.56495	272	21	0.88	0	11.3971	8.1	0.4	5.1	8.1	2.2	7.4	1.5	2.2	5.1	10.7	1.8	2.9	11.4	4.4	5.1	12.5	5.5	4	1.1	0.4	70
A1L3X0	0.252313	7.47	0.151	-5.14562	281	0	-1.32	0	17.0819	5	2.1	3.6	2.1	10	4.6	2.8	5	6.4	11	4.3	2.8	3.6	2.8	3.6	6.4	6	7.1	3.6	7.1	88.0783
A1L443	-0.58373	65.48	0.062	1.99192	756	5	2.29	0	15.3439	8.7	1.5	2.9	7.1	2	8.9	2.2	1.3	4.6	9.3	1.7	0.9	15.3	6.5	6.1	8.1	4.4	6.2	1.2	1.1	68.0291
A1L453	0.257669	22.7	0.343	-1.55418	326	1	0.6	0	0	8	3.4	2.5	4.6	1.2	9.2	3.1	4.9	2.5	12.3	3.4	3.7	8	3.1	3.1	7.4	3.7	9.2	3.4	3.7	101.656
A1L4H1	-0.59555	39.16	2.42	2.03583	1573	5	3.92	0	39.4151	8.2	2.7	5.8	4.6	1.1	9	3.2	1.4	2.1	7.4	1.5	1.1	14.7	2.5	5.9	8.1	13.2	4.5	2.5	0.6	55.321
A1L4K1	-0.580774	23.23	0.003	0.7482	749	7	1.21	0	12.1495	5.9	2.5	5.7	12.1	3.9	5.2	3.7	4.1	4.8	7.2	2.3	3.5	5.2	3.6	5.1	7.1	5.7	7.3	1.1	3.9	71.4286
A1X283	-0.844786	62.46	5.1	2.59005	911	36	1.58	0	19.8683	5.6	0.9	5.6	8.2	2.5	7.6	1	4.2	8.1	6.9	1.5	2.5	11.7	5.4	6.8	8	3.4	5.9	1.9	2.2	66.0263
A1XBS5	-0.761938	23.53	15.4	2.25807	289	5	-1.02	0	0	9.3	1	6.9	10	3.5	2.1	1.7	4.2	6.9	9.7	2.4	5.2	1.7	6.2	8.7	5.2	7.3	5.2	0	2.8	78.3737
A1YPR0	-0.529564	37.16	0.023	2.075	619	7	1.35	1	9.36995	8.9	2.6	7.4	8.6	5	6.9	3.9	3.9	5.2	9.7	2.3	3.4	9.4	3.4	5.2	4.5	3.2	3.6	0.6	2.4	72.1163
A2A288	-0.580076	51.99	0.392	2.14204	527	4	2.9	0	22.0114	8.7	1.5	6.8	5.3	3.6	8.9	2.7	2.3	3.6	9.5	1.1	1.5	12.1	3.2	9.9	7	2.3	5.9	1.7	2.3	71.6698
A2A2Y4	-0.363987	36.68	0.073	0.173746	597	9	-0.48	0	0	4.7	2.7	4.4	10.1	5.4	4.2	3.4	6	7.5	11.2	1.7	2.3	6.4	3.5	4.9	8.2	4	4.9	0.8	3.9	86.0637
A2A2Z9	-0.801583	23.74	0.139	2.52528	1011	13	-0.14	0	30.366	6.5	1.7	4.7	12.2	2.5	2.5	3.1	5	11.7	12.5	3.1	6.5	1.6	4.9	5.9	5.2	3.9	3.9	0.4	2.3	85.9941
A2A368	-0.392901	33.95	0.069	1.18157	324	2	0.04	0	0	7.1	1.2	4.9	10.5	4.3	4.6	3.1	4.3	8	9.3	2.8	1.9	5.2	4	3.1	10.5	5.2	6.8	0.6	2.5	79.7531
A2A3K4	-0.387798	30.11	0.457	0.148944	754	18	1.56	0	0	7.6	2.7	4.2	7.4	3.4	5.7	3.8	4.8	6.4	9.9	2.5	4	6	5.2	5.3	7.3	4.5	6.1	1.2	2	82.6658
A2A3L6	-0.583849	27.84	0.016	1.78279	582	6	1.53	0	13.7457	13.7	2.1	2.6	6.7	2.2	9.1	4	0.9	4.1	10.8	1	2.7	6.4	7.6	8.1	6.5	3.3	4.3	1.4	2.6	71.7698
A2AJT9	-1.40155	67.93	0.522	3.59768	711	25	2.3	1	29.1139	3	1	6.3	7.6	3.7	5.1	4.6	4.5	9.7	3.8	1.3	4.6	6.5	5.2	10.1	9.3	4.5	3.8	0.8	4.6	46.3291
A2CJ06	-0.560035	33.56	0.002	1.25171	578	7	0.78	0	8.13149	7.1	2.4	4	6.6	2.8	3.8	2.8	3.6	6.6	12.8	2.1	3.6	6.1	8.1	6.7	9	5.4	4	0.7	1.9	82.7336
A2IDD5	-0.68379	26.94	0.033	1.71012	438	1	1.47	0	19.863	11.4	1.1	3.9	7.8	1.6	7.1	4.6	2.1	3.7	11	0.5	2.1	5.7	8.4	8.4	7.3	5.3	5	2.3	0.9	76.7352
A2PYH4	-0.376864	35.54	0.012	-0.280008	1435	21	0.32	0	20.3484	5.4	1.5	5.6	7.2	4.9	4.3	2.3	6.7	8.5	9.3	2.4	5.2	3.9	4.3	4	8.8	6.3	5.9	0.9	2.5	85.122
A2RRD8	-0.952259	4.52	0.256	1.70728	509	16	0.02	1	25.3438	4.3	6.3	3.9	8.1	3.7	5.5	8.6	4.1	10.4	6.1	1	3.1	2.9	3.9	7.3	6.5	6.1	3.9	0.4	3.7	55.5599
A2RRH5	0.000604595	1.33	0.003	-1.27379	827	4	0.65	0	4.23216	9.6	4.2	4.5	4.4	3.9	7	2.7	4	4.1	11.2	1.8	2.8	4.4	4.4	5.6	9.9	5.2	6.8	1.3	2.4	88.6094
A2RRP1	-0.289709	17.71	7.94	-0.773081	2371	33	0.74	0	13.4964	7.1	2.4	4.9	8.6	2.9	4.7	2.9	4.4	5.9	13.5	1.9	2.8	4.6	5	4.9	7.6	5.4	5.5	1.5	3.6	92.8933
A2RTX5	-0.493392	8.35	3.14	0.540682	802	9	1.22	0	10.0998	6.7	2.2	5	10.1	5.2	5.2	2.6	6.2	7	9.1	2.5	4.4	4	4.5	5.9	5.7	4.5	4.4	1.7	3	79.202
A2RTY3	-0.450351	5.26	0.338	1.08712	570	4	0.73	0	9.47368	7	2.5	3.3	8.2	2.8	2.6	2.5	4.4	9.5	12.3	3.5	2.6	6.7	6.7	6	5.6	4.7	5.6	1.2	2.3	88.2982
A2RU30	-0.755662	74.47	0.431	1.59158	521	16	1.11	0	0	5.4	2.9	6.5	7.9	4.8	3.5	2.1	2.7	5.8	8.6	1.7	2.7	7.9	7.5	6.1	10.6	6.1	4.4	1.7	1.2	62.3417
A2RU48	-0.0137778	1.33	0.614	0.699929	225	2	0.05	0	9.33333	8.4	1.3	4.9	7.6	1.3	4.9	2.2	9.3	10.2	11.6	2.7	4	1.3	5.3	3.1	5.8	5.3	8.9	0	1.8	115.689
A2RU49	-0.154424	4.83	0.282	-0.308265	373	1	-0.32	0	0	6.2	1.3	3.5	7.2	4.3	5.6	3.5	5.6	7.2	10.5	3.2	4.3	4	4	2.4	9.9	4.3	7.2	0.8	4.8	89.8928
A2RU54	-0.671429	71.06	0.291	2.18584	273	2	2.26	1	0	8.4	1.8	3.3	7	3.7	9.2	1.8	1.1	6.2	9.2	1.5	2.2	10.6	4	6.6	12.1	3.7	3.7	1.5	2.6	59.0476
A2RU67	-0.00128617	17.68	0.337	-0.756299	622	20	0.11	0	13.9871	7.1	1.3	5.6	5.5	2.6	8.4	1.4	4.2	3.4	14	2.1	3.9	6.6	3.5	4.2	9.3	5.8	7.6	1.4	2.3	99.8392
A2RUB1	-0.789181	59.03	0.189	1.3583	952	7	2.62	0	7.2479	4.9	2.2	5.7	6	4.2	5.1	3.2	3.2	6	8	2	7.2	5.8	5.6	5.1	10.1	6.9	4.4	0.7	3.7	61.1555
A2RUB6	-1.08207	88.61	0.06	3.3865	948	22	2.6	0	35.865	3.5	1.7	4.5	10.7	1.9	3.6	2.6	5.3	11.2	8.8	2.2	5.5	4.2	8.5	4.9	9.5	5.5	3.3	0.9	1.8	67.6793
A2RUC4	-0.429524	2.54	0.736	0.567314	315	7	-0.3	0	0	6.3	1	6.7	7.3	6.3	4.8	2.5	4.1	8.3	10.2	1.6	2.5	5.4	4.8	5.7	6	3.2	7.3	1.3	4.8	83.2381
A2RUH7	-0.283616	0	0.413	0.447682	354	0	-0.05	0	0	9.3	2.5	5.1	4.8	3.1	7.3	1.7	6.2	5.9	8.2	0.6	2.8	8.2	5.4	5.4	5.1	7.9	6.2	1.7	2.5	83.5311
A2RUR9	-0.988788	69.66	0.036	3.016	1427	10	3.35	0	35.8795	4.1	1.8	5.8	12.3	1.7	3.2	2.5	4	9.5	11.2	2.5	6.1	3.4	7.9	4.6	7.8	4.7	4.1	0.8	2	75.1577
A2RUS2	-0.21419	12.77	7.2	-1.45001	1198	17	1.06	0	0	6	2.8	5.3	6.5	4	4.6	3.6	4	6.3	11.8	3.2	3.1	5.7	4.5	4.9	6.9	5.3	7.5	1.5	2.5	89.3239
A2RUT3	-0.0415094	15.72	0.142	0.00555	159	0	-0.24	0	0	6.3	3.1	1.9	2.5	0	9.4	5	5	3.1	14.5	3.1	0	6.9	6.3	7.5	6.9	7.5	5.7	3.1	1.9	98.7421
A2VCK2	-0.377937	33.81	0.002	1.4573	349	7	0.62	0	0	10.3	2	3.7	5.4	3.2	8.6	3.2	2	4.9	10	0.6	1.4	10.3	6	6.3	6.9	4.6	7.2	0.6	2.9	78.0229
A2VDF0	0.325325	0.65	1.67	1.09955	154	1	-0.96	0	0	12.3	1.9	3.2	8.4	2.6	7.1	0.6	4.5	4.5	16.9	2.6	1.9	6.5	1.9	5.8	3.9	3.2	7.8	0.6	3.2	118.506
A2VDJ0	-0.366936	47.3	0.051	-1.63401	1609	34	3.23	0	16.7806	5.3	2.9	4.2	6.1	4.7	5.4	2.6	4.5	5.7	9.3	2	5.9	6.5	4.4	3.8	10.9	6	5.7	1.5	2.6	75.6743
A3KFT3	0.709615	2.24	0.035	-4.98927	312	3	0.36	0	23.0769	6.4	3.8	3.2	2.2	8.3	5.4	2.2	8.7	3.2	12.2	6.1	2.9	3.5	1.6	3.8	9.3	5.4	6.4	0.6	4.5	106.25
A3KMH1	-0.332756	19.32	3.03	-0.476045	1905	11	2.83	0	5.98425	5.8	0.9	5.5	6.8	3.3	6.4	2.7	6	5.9	11.2	2.6	3.9	5.4	4.9	6.1	6.7	5.4	6.7	1	2.9	92.2572
A3KN83	-0.472003	26.06	9.63	1.35193	1393	54	1.27	1	7.89663	7	0.9	6.1	6.6	2.8	6.7	1.4	5.2	7.9	9.3	2.3	5	4.7	4.2	5	9	5.5	6.6	1.2	2.5	82.6705
A3QJZ6	-0.002079	0.83	0.008	-0.975091	481	3	-0.04	0	21.2058	4	4.6	4.8	6.4	5	4.2	1.5	3.7	3.7	16.6	2.9	2.3	5.8	4.2	8.7	7.7	4	6.2	1.7	2.1	101.497
A3QJZ7	0.0387029	0.63	0.013	-0.767524	478	0	0.64	0	22.3849	4.8	5	4.8	5.2	4.2	2.9	1.7	4.4	5.4	17.4	3.3	4.2	5.2	5	6.5	5.6	4.6	5.6	1.7	2.3	106.046
A4D0S4	-0.436286	7.61	0.196	-0.346468	1761	24	5.35	0	12.2658	6	7.3	6	5.7	2.7	7.8	3.1	4.3	5.1	9	1	4.9	5.8	6	4.7	7.3	5.1	4.8	0.6	2.8	71.8399
A4D0V7	-0.285673	13.74	0.145	-2.01263	1026	6	0.33	0	5.84795	3.3	3.2	3.2	6.6	5.8	5.8	3.5	5.6	6.2	10.9	1.8	4.5	5.8	6	4.6	6.5	6.3	5.9	1.3	3	84.7953
A4D126	-0.0572062	9.09	0.397	-0.741205	451	3	0.63	0	0	8.2	2.9	4	8.4	2.4	6	2.9	6.4	5.8	10.9	2	2.2	4.9	5.5	4.7	7.1	3.5	8.9	0.4	2.9	101.375
A4D161	-0.457047	25.84	0.23	1.32273	298	6	1.6	0	0	7.7	5	5	7.4	4.4	7	2	2.3	5.7	8.1	2.3	1	7.4	5	6	8.1	6	5	0.7	3.7	62.8859
A4D1B5	-0.117096	9.25	0.235	-2.01004	854	7	0.35	0	24.5902	4.7	2.6	4.6	6.2	4.2	4.4	4.7	5.9	5.5	13.9	2	6	3.4	3.9	3.9	8.2	4.1	6.6	1.5	3.9	100.878
A4D1E1	-0.791772	83.47	0.015	1.42514	1349	16	2.15	0	35.5078	4.2	3.5	4.7	6.2	3.5	3.3	5	4.9	8.8	8.7	1.1	6.1	5.8	5.9	4.2	12.1	5.9	3.5	0.4	2.4	67.235
A4D1E9	-0.242119	2.07	3.94	0.62327	387	5	0.85	1	9.56072	5.4	1.3	5.2	5.9	4.1	9	3.1	7	9.6	11.9	2.8	4.1	4.1	4.1	3.9	5.9	4.7	5.4	0.5	1.8	94.7287
A4D1F6	-0.23593	10.81	0.083	0.046813	860	4	-0.56	0	33.9535	3.4	2	3.5	7.8	3.7	3.4	2.1	9	7.8	16.3	1.4	8.7	3.4	5	3.5	9.2	4.7	2.7	0.1	2.6	109.535
A4D1N5	-0.336667	8.67	0.098	0.681674	150	0	0.74	0	0	6	1.3	2.7	7.3	2.7	7.3	4	4	3.3	13.3	0.7	1.3	8	3.3	7.3	12	5.3	4.7	3.3	2	87.1333
A4D1P6	-0.419679	9.5	16.2	0.077543	747	21	1.41	0	0	6.8	2.1	5.1	7	4.3	6.8	2.3	3.3	5.8	10.3	2	3.2	5.4	5.9	5.2	9.1	5.4	5.9	1.5	2.7	77.162
A4D1S0	-0.301956	50.61	0.802	1.03085	409	19	2.35	0	26.4059	13	2.9	2.7	7.6	1.5	9.8	1.7	0.7	3.2	9.3	1.2	1	13.4	3.7	5.4	8.8	3.2	6.6	2.7	1.7	71.198
A4D1S5	-0.152535	18.89	0.381	0.191787	217	3	-0.9	0	0	8.3	2.3	5.1	7.4	4.1	5.5	3.7	6.9	6.5	8.8	2.3	3.7	1.8	3.2	4.1	7.8	6.5	6.9	1.4	3.7	89.447
A4D1T9	-0.146383	5.96	0.199	-0.613754	235	1	-1.09	0	0	5.5	2.6	4.7	3.8	4.3	6.4	2.6	4.3	7.7	9.4	2.6	5.1	6	4.3	3.8	6.4	4.7	10.2	1.7	4.3	88.2553
A4D1U4	-0.223736	21.76	0.252	-0.463023	455	5	0.26	0	0	6.4	2.6	4.6	8.8	5.1	7.5	2.6	4.2	3.7	10.3	2.9	2.9	7.7	4.6	5.7	5.5	2.2	7.5	1.1	4.2	84.6154
A4D263	-0.691781	19.86	0.11	1.64255	438	4	2.25	0	10.274	4.1	1.4	6.8	4.6	4.3	5	3.4	4.6	6.8	7.5	1.6	4.3	10.3	3.7	5.7	7.8	7.5	5.5	0.9	4.1	67.1918
A4D2B0	-0.12594	8.27	0.568	0.91483	266	4	1.05	0	27.8195	10.2	0.8	5.6	7.5	1.5	15.8	3.4	0.8	0.4	10.5	0.4	0.8	9	3.8	6	5.6	3.8	12	1.1	1.1	89.0226
A4D2H0	-0.786744	39.12	0.381	2.58093	777	21	3.33	0	11.8404	6.3	0.9	5	11.8	3.9	5.3	2.1	3.2	6.9	10.8	2.2	4.5	8.1	4.6	5.8	8	4	3.7	0.5	2.3	71.8404
A4D2P6	-0.431792	45	0.32	1.53082	1211	12	3.3	0	18.0842	7.8	1.6	4.6	7.1	3.8	7.2	2	2.4	4	11.8	1.9	1.7	10.4	4.1	7.7	10.3	4.6	4.9	0.7	1.4	77.2832
A4FU01	-0.353597	17.49	0.439	0.212335	709	5	0.55	0	3.38505	6.5	1.7	4.7	5.9	3.9	7.9	2.1	3.1	2.1	12.8	1.3	2.7	8.2	6.1	8	8.7	3.8	5.4	3.4	1.7	84.189
A4FU28	-0.801802	39.51	0.364	2.63501	777	4	3.67	0	11.7117	5.8	0.8	5	11.7	3.6	5	2.2	3.6	6.9	10.7	2.2	4.2	8.6	4.4	5.9	8.8	4	3.6	0.5	2.4	71.9562
A4FU49	-0.992188	86.25	0.263	3.61456	640	10	2.62	0	25.625	6.1	0.5	4.4	11.7	1.4	4.8	1.4	2	8.3	7	1.6	2	13.9	4.7	5.9	9.1	6.7	6.6	0.6	1.2	60.4688
A4FU69	-0.605323	39.72	0.113	0.487541	1503	15	-0.27	0	18.6959	4.2	1.1	4.6	10.9	4.2	4.5	2.9	5.8	7.8	9.6	2.5	4.6	4.1	6	4.8	7.8	4.9	6	1.1	2.8	81.497
A4IF30	0.296929	28.41	0.006	-4.12687	521	0	0.45	0	0	7.1	2.5	3.1	4	6.1	6.7	2.5	7.1	5.2	11.9	2.5	4.2	3.1	2.5	4	9.4	6.3	7.3	2.3	2.1	102.361
A4QMS7	-1.01837	9.52	0.023	2.44665	147	3	-0.67	0	0	5.4	0.7	7.5	8.2	3.4	5.4	4.1	5.4	5.4	6.8	0.7	3.4	9.5	3.4	10.2	7.5	3.4	4.1	0	5.4	65.034
A4QPB2	-0.426587	0	0.039	0.849955	252	0	-0.41	0	4.36508	8.7	1.2	8.3	5.2	1.2	6.3	4	6.3	5.6	9.5	1.6	5.2	4.4	2.8	5.6	4.4	6.7	6.3	4.4	2.4	89.0476
A4QPH2	-0.182095	8.28	5.23	-0.628202	592	7	0.13	0	0	6.8	2.7	6.1	5.4	5.9	6.1	1.2	6.4	6.2	9	3.9	3	5.7	4.9	5.1	7.3	4.6	5.1	1.2	3.5	81.402
A4UGR9	-0.838382	93.18	0.185	3.00336	3374	41	1.82	0	49.5554	4.1	0.9	5.1	10.6	3	4.3	2.6	6.1	9.8	6.3	2.1	4.2	5.1	6.1	4.3	9.5	7.5	6	0.7	1.8	69.6266
A5A3E0	-0.679442	32.37	152	1.67192	1075	38	3.68	0	11.814	5.4	2.7	6	9.2	2.2	6.4	3.2	4.6	7.9	9	3.9	4.9	4.1	4.5	5	7.6	5	4.7	0.9	2.6	72.1209
A5D6W6	0.526027	12.33	0.198	-3.82466	292	1	0.24	0	17.1233	11	2.7	0.7	2.4	6.8	9.9	4.8	2.1	1.7	17.1	0.7	2.4	4.8	2.4	6.2	5.1	4.5	8.2	3.4	3.1	109.589
A5D8T8	-0.247758	8.52	0.087	-0.77487	446	2	2.32	0	9.64126	10.1	6.3	3.4	4.5	4.3	8.3	3.6	2.5	2.9	8.7	1.6	3.6	4.3	5.8	6.7	7	5.4	5.2	3.4	2.7	68.7668
A5D8V6	-0.672113	51.27	2.55	2.35042	355	4	4.66	0	20	7	0.3	2	8.7	2.5	7.9	0.6	1.1	3.1	10.4	2.5	1.4	20	7.3	5.6	7.6	2.8	4.5	0.6	3.9	65.1549
A5D8V7	-0.935462	24.03	0.094	3.10086	595	11	1.26	0	37.9832	8.2	0.5	4	12.3	1.7	3.5	3.9	2.5	9.2	13.1	1.8	3.4	2	7.7	8.7	6.1	4.2	4.7	0.8	1.5	82.8403
A5D8W1	-0.139214	5.31	10.6	-0.547605	941	5	0.67	0	17.8533	6.6	2.3	4.8	7.9	3.7	5	1.8	8.4	9.5	12.1	1.9	4.4	3.6	5.2	3	6.4	4.6	5.7	1.1	2.1	103.22
A5LHX3	-0.317	20.67	0.524	0.81324	300	0	3.07	0	0	11.3	3.3	5.7	5.7	2	9	4.3	1.3	1.3	9	1.7	0	6.3	4	7.7	8.7	6	7	1.7	4	71.9333
A5PKW4	-0.59873	61.62	0.152	2.60675	1024	8	3.38	0	31.0547	10.3	1.1	4.7	7.5	3.2	9.3	2	1.8	4.4	9.8	1.2	1.8	11.5	3.4	7.2	10.4	3.9	3.8	1	1.9	66.2402
A5PL33	-0.670777	98.16	0.165	3.08849	1030	21	3.87	0	38.7379	8.3	2.6	3.2	6.3	1	11.5	2.9	1	2.7	10.2	0.6	1.2	16.2	4.7	7.2	11.1	4	3.5	1.7	0.4	61.932
A5PLK6	-0.358736	29.74	0.162	-0.89675	1076	5	0.41	0	19.5167	4.1	2	3.8	7.2	5.2	3.1	2.8	7.1	8.7	11	3.7	4.3	4.4	5.5	4.9	8.5	4.8	4.4	1.7	3.1	87.0725
A5PLL1	-0.46323	53.5	0.046	1.63273	514	6	0.31	0	0	6	1.9	5.3	6	1.9	5.1	3.1	5.3	7.8	11.7	1.9	4.7	7.2	4.9	3.7	11.1	5.6	4.7	0.4	1.8	85.5837
A5PLN7	-0.561061	68.18	0.381	2.36663	773	8	2.56	0	12.031	9.4	1.2	4.3	5.3	2.7	9.1	3.1	1.7	3.8	9.1	1	1.6	8.8	3.8	8.2	12	7.4	5	1.4	1.3	65.9508
A5PLN9	-0.0980815	9.11	2.31	-0.116996	417	3	-0.07	0	0	4.8	2.9	5	6.7	3.8	5	1.9	5.3	6	11.5	3.4	4.8	4.1	4.8	3.4	8.4	7.2	7.9	0.5	2.6	93.2134
A5X5Y0	0.126535	15.35	0.008	-2.91763	456	1	0.7	0	0	5.3	2	3.5	5	5.9	6.1	2.6	5.5	3.9	13.8	3.5	4.4	6.4	3.3	3.9	7.7	6.1	5.9	2.4	2.6	97.6974
A5YKK6	-0.157155	24.66	19.6	-2.70786	2376	39	2.03	1	26.8939	8	1.7	4.5	5.6	4.3	4.8	3.2	5.7	4.9	12	3.1	4.5	6	6.1	4.6	6.1	5.5	5.7	0.8	2.8	93.5354
A5YM69	-0.955165	91.12	2.71	3.7178	484	15	0.74	0	26.0331	7	1.4	4.5	17.8	1.7	8.9	2.3	2.7	3.1	8.3	1.9	1.7	7.2	8.3	4.5	8.9	3.7	3.9	1.2	1	61.1157
A5YM72	0.124667	5.32	0.434	-0.623255	827	6	1.38	0	38.5732	12.2	3.1	3.9	7.4	2.9	10.2	2.9	1.1	2.2	16.2	1.7	1.1	6.5	3.6	7	4.1	3.6	7.9	1.2	1.2	102.443
A6BM72	-0.285824	18.49	0.682	-1.27353	1044	3	6.75	0	30.1724	5.7	14	4.3	4.2	2.7	12.1	4.1	2.7	1.9	5	1.4	3.6	8	4.3	3.8	8.1	6	3.4	1.5	3.1	45.3544
A6H8Y1	-0.960556	99.05	0.068	5.35949	2624	79	2.32	1	33.9939	4.8	1.1	5.3	13.6	1.9	4.5	1.3	4.6	8.5	6.7	2	5	6.2	4.6	6.1	9.5	7	6.5	0.1	0.8	67.5457
A6H8Z2	-0.775871	52.24	0.112	1.67976	402	2	1.01	0	22.1393	6	4.7	4.5	11.4	3.7	4.2	6	3.5	3.5	6.2	1	2	8.5	4.2	6.2	10.7	6.5	4.2	2	1	56.0697
A6NC51	0.839485	14.59	0.068	-4.66796	233	0	0.87	0	5.15021	9.9	4.3	1.3	1.3	5.2	6.4	1.3	6.4	1.3	15.9	2.1	2.6	6.9	4.3	4.3	7.7	3	9	5.2	1.7	123.047
A6NC57	-0.908615	29.44	0.002	2.83592	917	12	-0.43	0	34.024	5.7	2.5	6.2	10.9	1.7	3.1	2.3	4.6	9.5	10.6	2.9	6.3	1	7.3	6.7	7.2	4.5	4.4	0.4	2.3	77.4373
A6NC78	-1.0212	71.36	0.054	3.08424	632	10	3.65	0	30.3797	9	1.4	3.2	12	1.4	5.9	4	2.1	8.9	10.6	1.9	3.6	5.2	9.5	6.2	6.8	2.8	3.6	0.9	0.9	68.9399
A6NC86	0.0362745	8.82	0.544	-0.439957	204	3	0.96	0	9.80392	5.4	9.8	2.9	3.9	4.4	8.8	4.9	2.5	5.4	9.3	4.4	2.5	4.9	2	3.9	8.8	9.8	5.4	0	1	66.9118
A6NC98	-0.829065	65.31	11.4	4.72993	1476	19	1.19	0	61.8564	11.2	0.5	2.8	15.6	0.7	7.4	2	0.8	2.7	15.2	1	1.2	5.9	9.1	10.7	6	2	3.7	0.9	0.4	84.4106
A6NCC3	-1.0288	71.36	0.134	3.25738	632	14	4.01	0	22.6266	8.9	1.6	3.3	13.3	1.3	5.5	4	2.4	7.8	10.9	1.6	3.6	4.9	9.3	6.5	6.8	3.2	3.3	0.9	0.9	70.3323
A6NCF5	0.00412758	2.81	0.332	0.26629	533	7	0.66	0	28.1426	12.8	2.6	3.2	6	2.4	8.6	3.2	1.1	1.3	15.4	2.1	0.9	7.7	3.8	7.7	6.6	3.9	5.8	2.1	2.8	94.015
A6NCI4	-0.38674	18.83	0.008	0.040199	1184	10	0.55	0	0	5.7	2.4	4.9	6.3	3.2	5.1	2.9	5	7.4	11.7	2.5	3	4.6	5.7	5.2	9.5	5.6	5.2	1.8	2.4	85.5743
A6NCI8	-0.60423	84.92	0.184	1.2202	922	11	1.97	0	31.0195	6.7	1	2.9	5.5	2.2	4.3	1.8	3.9	6.7	7.8	2.1	4.6	8.9	7.3	3.5	14.9	7.4	5.5	0.7	2.4	68.449
A6NCJ1	-0.876555	7.66	0.427	1.4861	209	0	0.51	0	24.4019	9.6	2.4	3.3	5.3	1	4.3	1.9	1.9	1.4	7.2	1.4	2.9	12.4	5.3	10	8.6	6.7	2.4	5.3	6.7	51.9617
A6NCK2	-0.386996	1.12	0.124	-0.116574	446	0	0.83	0	0	4	3.8	4.5	7.6	5.6	3.6	4	4	6.3	11.4	2.9	4.9	4.5	4.3	6.5	7.4	3.6	6.1	2.2	2.7	81.9283
A6NCL1	-0.806886	43.41	0.359	1.54743	334	2	2.59	0	0	6.6	1.8	6	7.2	4.2	3.9	3.3	1.8	6.3	9	0.9	4.8	6.6	6.3	4.5	10.8	6.3	4.5	1.8	3.6	61.6467
A6NCL7	-0.61498	46.76	0.571	2.18509	494	2	1.25	0	21.8623	11.5	2	4.7	8.9	2	7.9	1.4	1.8	3.8	7.5	1.8	1.8	9.5	4	10.3	5.5	5.3	7.3	1	1.8	68.9879
A6NCN8	-0.745574	10.82	0.202	1.42781	305	0	2.65	0	12.459	6.6	1.6	3.3	4.3	5.6	3.6	4.6	2.6	6.6	9.5	2.3	3	12.5	6.6	7.9	7.5	4.6	3	3	1.6	62.4262
A6NCQ9	0.0245455	30	0.887	-0.248161	220	2	0.51	0	0	8.2	4.1	3.6	4.1	2.3	5.5	1.8	2.7	3.2	13.6	1.4	0.5	10	4.1	7.7	13.2	3.2	8.2	1.4	1.4	95.7273
A6NCS4	-0.651827	75.08	0.784	2.19294	301	0	5.96	1	23.588	10.3	2	2.7	5.3	2.3	12.6	2.3	0.7	3.7	8	1.3	2	11	5.3	9.6	8	3.3	5.6	0.7	3.3	60.3654
A6NCS6	-0.122712	31.53	0.451	1.69053	295	0	0.5	0	33.8983	22.4	2.7	3.4	7.8	2.7	11.2	0.3	0.7	1	10.2	0.7	0.7	8.1	4.1	11.5	3.7	1	6.1	1.4	0.3	82.3729
A6NCV1	0.725	1.28	0.609	-4.86083	312	2	-0.95	0	32.0513	5.4	2.6	3.5	1.9	8	2.6	1.9	8.7	5.1	15.4	4.5	3.2	3.5	2.6	2.6	8.7	9	7.1	0.3	3.5	119.647
A6NCW0	-0.522264	39.25	0.338	0.023896	530	3	-0.24	0	4.90566	7.7	3.6	4.7	5.8	2.5	5.5	4.9	2.5	6	10.9	2.3	3.4	4.7	7.4	4.9	7.9	5.7	5.3	1.3	3	75.3019
A6NCW7	-0.509434	39.25	0.338	-0.130746	530	0	-0.43	0	0	7.2	3.6	4.7	6	2.5	5.3	4.7	2.5	5.8	10.8	2.6	3.6	5.1	7.2	4.7	8.3	5.3	5.7	1.3	3.2	75.0943
A6ND01	-0.282	13.6	0.051	-0.898776	250	0	2.13	0	13.6	6	7.2	3.2	6.8	4.4	5.6	2.4	2.4	4.4	9.6	2.4	4.8	8.4	3.2	4	8.4	3.6	4.4	6.4	2.4	65.56
A6ND36	-0.696598	60.87	0.682	2.28038	823	23	2.12	0	10.4496	7.5	0.6	6.6	7.2	2.8	7.7	2.8	3.5	4.9	7.3	2.1	2.3	10.4	5.5	7.2	8.5	3.2	6.7	1.3	2.1	69.0887
A6ND48	0.805788	1.29	0.003	-5.64085	311	1	-0.11	0	8.03859	7.4	3.2	1.9	2.6	8	3.5	2.6	7.7	2.9	14.8	3.5	2.3	3.2	3.5	3.9	8.7	6.1	8.7	1	4.5	120.354
A6ND91	0.0222615	1.06	7.59	0.384794	283	4	0.81	0	12.0141	12	1.8	4.2	4.6	2.5	10.6	3.5	2.1	0.4	12.4	1.8	2.1	7.8	3.5	8.1	6.7	4.6	8.8	1.8	0.7	94.1343
A6NDA9	0.0576364	11.27	0.049	-2.03396	550	1	0.61	0	0	8.2	3.8	4.2	6	3.5	6.2	3.1	4.4	3.6	12.9	1.1	3.6	6	3.8	4	8.7	5.3	7.6	1.8	2.2	97.6909
A6NDB9	-0.929421	92.57	1.23	4.40836	673	29	2.89	0	31.5007	8.9	0.9	2.7	18.7	0.4	12.8	0.6	1.8	4.9	7.4	1	1	8.6	4.9	6.7	7	4.2	5.9	1.2	0.3	62.0802
A6NDD5	-0.358824	52.1	0.579	0.326661	238	0	0.78	0	0	9.7	2.1	4.2	9.2	3.4	8.4	2.1	1.7	2.1	11.8	1.3	1.7	8.4	5.5	4.2	9.2	5.9	4.2	1.3	3.8	74.2857
A6NDE4	-1.40363	82.66	0.073	3.56565	496	15	5.81	1	51.6129	6	1	6.2	4.8	1.4	11.1	5	1.6	3.8	3.2	1.6	3.6	7.1	1.6	13.7	14.7	3	2.2	1	7.1	31.3508
A6NDG6	0.0233645	3.12	39.1	0.849838	321	12	0	0	12.7726	12.8	2.5	6.2	5	3.1	10.9	0.6	2.8	3.7	12.1	1.9	2.5	5.9	3.1	6.9	4	5	7.8	0.6	2.5	93.676
A6NDH6	0.758786	1.92	0.021	-5.12236	313	7	-1	0	11.1821	5.4	2.9	2.2	2.9	7	4.5	2.2	11.2	5.1	14.4	3.5	4.2	4.5	2.2	1.9	7.3	5.8	7	1	4.8	125.495
A6NDI0	-0.367035	2.21	0.039	-0.609554	452	5	1.66	0	10.3982	4	5.3	4.2	7.7	5.3	4	5.1	5.3	6	10.8	3.1	4.6	4.4	4.2	5.8	7.1	4.4	4.2	2	2.4	79.1593
A6NDK9	-1.157	80.52	0.289	3.82285	693	7	2.29	0	26.6955	6.9	0.4	3.6	15.3	1	4	2.5	2.2	7.9	11.3	1.9	3.3	4.9	11.4	6.9	6.1	4	4.5	0.7	1.2	72.2367
A6NDN3	-1.14372	77.2	0.15	3.71939	693	3	2.23	0	26.4069	6.8	0.6	3.6	15.2	1	4	2.6	2.2	8.1	11.3	1.9	3.2	4.8	11.3	6.9	6.1	4.2	4.6	0.7	1.2	72.5108
A6NDP7	0.795765	8.79	0.337	-5.47721	307	0	0.37	0	26.0586	14.3	4.9	2	2	7.2	8.1	1.6	2	1	12.1	2	1	4.9	2.3	5.5	5.9	5.5	11.7	1.6	4.6	102.964
A6NDS4	-0.666302	34.79	0.0825	1.46771	549	0	2.97	0	8.74317	6.7	2.4	5.5	6	3.1	7.5	2.7	4	5.6	8.7	2.4	1.8	8.4	5.8	8.7	7.1	4	4.4	2.7	2.4	69.1439
A6NDU8	-0.328571	8.16	5.05	1.00071	294	4	-0.31	0	0	6.1	3.7	5.1	10.2	3.1	4.8	3.1	3.7	6.8	14.6	2.7	4.4	2.7	4.1	3.7	8.2	3.1	4.4	1.4	4.1	90.5782
A6NDV4	0.325636	11.65	0.109	-3.49595	472	0	1.12	0	0	8.1	4.2	3	3.4	5.3	7.8	2.1	2.8	1.1	14	2.5	2.3	7.4	3	6.4	7.2	5.9	8.1	2.1	3.4	96.6737
A6NDY0	-0.731295	33.81	0.902	2.49972	278	1	0.89	1	12.2302	7.6	1.8	4	12.2	4	11.5	2.2	2.2	4.3	7.6	1.1	1.8	9	5.8	5.8	6.8	4	5	1.8	1.8	60.036
A6NDZ8	-0.610096	27.88	0.004	2.56825	208	0	0.42	1	13.9423	11.1	2.4	2.4	5.3	1.9	6.7	2.4	2.9	4.8	10.6	3.4	1	10.6	5.8	13.9	6.2	3.8	3.8	0.5	0.5	74.7115
A6NE01	-0.599447	84.81	0.038	1.91971	2351	22	1.74	0	42.1097	6.6	0.3	2.8	8.1	2	4.6	1.4	6.3	8.1	11.2	2.3	2.1	8.3	11.8	3.3	7.5	7.6	3.2	1	1.4	84.4364
A6NE02	-0.0732218	9.21	0.06	-0.27043	478	2	1.32	0	14.0167	14	0.6	4	4.4	3.6	7.3	4	1.7	1.5	13.6	0.8	2.3	5.9	5.6	7.7	6.5	3.6	7.5	2.3	3.1	95.4184
A6NE52	-0.17349	29.78	0.165	-1.10545	1622	2	1.86	0	26.6954	8.6	2.4	4.4	5.4	2.3	5.7	3.3	1.7	2.7	15.3	1.6	1.2	8.8	5.6	7.3	7.7	4.8	6.8	2.7	1.8	94.5376
A6NE82	-0.635577	24.52	0.004	2.60839	208	0	0.5	1	13.9423	11.1	2.4	2.4	5.3	1.9	6.7	2.4	2.4	4.8	10.6	3.4	1	10.6	5.8	13.9	6.7	3.8	3.8	0.5	0.5	72.8365
A6NEC2	-0.157113	10.04	32.8	-0.520297	478	12	0.04	0	0	9.8	1.9	6.9	6.3	5.4	4.8	1.9	4.4	5.2	9.2	2.1	3.8	5.9	2.7	4.8	5.9	5.6	7.5	1.9	4	84.7071
A6NED2	-0.25133	0.8	1.77	0.69493	376	3	2.51	0	26.0638	13	1.9	3.7	8.5	2.7	13	1.9	1.1	2.1	10.4	0.8	1.3	6.1	4	6.9	5.9	4.3	6.9	3.2	2.4	77.6862
A6NEE1	-0.912055	13.83	0.389	3.03036	506	3	0.14	0	15.415	6.1	1	2	15.4	3.2	3.4	2	3.4	8.7	11.5	3.6	3.8	3.2	7.5	7.5	8.7	3.2	3.4	1	1.8	73.6759
A6NEF3	-1.29251	76.31	0.055	5.01068	574	1	3.04	0	57.8397	6.3	1.4	1.6	23.2	0.7	5.2	1.7	1.7	4.5	13.8	0.9	2.4	3.8	9.6	11.3	4.7	2.6	2.6	1	0.9	74.3206
A6NEH6	-0.490868	34.7	0.747	-0.023562	219	0	2.42	0	0	7.3	3.2	2.7	11.9	5.9	5.9	2.3	3.2	6.4	9.6	5	1.8	6.8	6.8	5.5	5	3.2	3.7	0.5	3.2	67.7626
A6NEK1	-0.194737	9.65	0.012	-0.668101	342	3	0.4	0	0	4.4	2.6	3.5	7	5	4.4	2.9	4.7	5	8.8	1.8	4.7	5.6	4.1	4.4	9.4	8.8	9.4	0.9	2.9	83.9766
A6NEL2	-0.65826	72.89	0.209	2.73724	793	20	2.05	0	30.1387	11.3	1.3	4.3	6.4	1.8	8.2	2.8	1.5	4.8	10.1	0.1	2	9.8	4.8	9	10.3	2.9	5.3	2	1.3	71.9546
A6NEM1	-1.05579	58.8	0.121	3.5517	432	1	3.02	0	26.3889	8.1	1.2	1.6	17.4	0.9	6.9	1.6	2.3	5.3	12.3	1.4	3.2	5.1	9	8.8	6.2	3.5	2.5	1.4	1.2	72.3611
A6NEN9	-0.636066	34.43	0.118	0.9853	183	0	0.43	0	13.6612	5.5	2.2	2.7	4.4	3.8	3.3	1.1	4.4	13.7	9.3	3.3	5.5	6.6	4.4	8.2	4.9	6	6.6	0.5	3.8	77.7596
A6NEQ2	-0.204695	60.56	1.25	1.9821	426	5	3.51	0	43.1925	16.2	1.4	4.9	5.4	3.8	14.1	1.6	0.9	3.5	9.4	0.5	1.2	12.9	1.4	4.7	8	3.1	4.5	0.7	1.9	69.4131
A6NER0	-0.656102	34.24	0.088	1.45501	549	0	3.11	0	0	6.7	2.4	5.5	6	3.1	7.7	2.7	4	5.8	8.6	2.2	1.8	8.6	5.6	8.6	6.9	4	4.7	2.7	2.4	69.49
A6NES4	-0.00424134	10.81	0.042	-3.16815	1674	23	1.42	0	18.1004	7.1	2.2	4.2	7.5	3.2	3.7	2.9	5.3	5.8	14	4.1	2.7	3.6	4.9	4.7	7.6	5.6	7.1	1.3	2.3	103.208
A6NEV1	-0.252256	34.21	0.015	1.75766	266	1	2.84	0	16.1654	10.5	1.5	5.3	9	3.4	7.5	1.5	2.3	1.1	10.5	1.1	0.4	16.2	3	6.4	9.8	1.5	7.1	0.8	1.1	81.0902
A6NEY3	-1.41317	37.58	0.048	5.15375	463	0	2.3	0	61.987	4.1	2.2	1.5	24.6	0.4	3.9	1.5	1.5	4.5	14.7	0.9	1.9	4.1	10.2	12.5	4.5	2.6	2.2	1.1	1.1	73.5421
A6NF01	-0.245444	100	3.91	0.925008	834	40	5.16	0	63.3094	13.7	0.2	1.2	2.4	6.4	8.4	0.6	1.7	3.8	5.8	1	2.2	14.1	4.3	2	16.4	12.7	2.6	0.2	0.2	50.3118
A6NF34	-0.315848	31.85	0.007	-0.743775	631	1	2.54	0	16.7987	5.2	5.9	3.3	4.8	4	5.4	3.5	4.6	4.1	10.5	1.7	4	10.9	5.2	6.7	8.1	4.1	4.8	1.3	2.1	77.7338
A6NF36	-0.627451	7.19	0.218	2.14258	153	0	-0.31	0	0	7.2	2	5.9	10.5	2.6	5.2	1.3	3.3	7.2	14.4	2.6	2	3.9	8.5	8.5	5.9	2.6	4.6	0.7	1.3	89.281
A6NF89	0.714968	1.27	0.004	-5.53784	314	2	-1.05	0	17.8344	3.5	3.5	2.9	2.5	8	2.2	1.3	9.9	5.4	14.3	3.8	3.2	4.5	3.2	2.9	7.6	8.6	8	0.6	4.1	120.987
A6NFA1	-0.37176	31.33	0.039	0.18355	517	2	2.04	0	10.058	9.3	1.2	5	4.8	3.9	5	3.3	3.3	2.9	11.6	1.7	3.7	10.1	6.6	5.6	6.8	6.4	4.8	1.5	2.5	81.3926
A6NFE2	-0.446939	20.7	0.677	1.15496	343	2	-0.83	0	0	4.1	1.7	8.2	9.9	3.8	3.8	1.2	4.7	8.7	14.9	4.1	5.2	2.6	5.2	3.5	5	6.7	4.4	0.9	1.5	92.9446
A6NFH5	-0.533571	4.29	0.138	1.73124	140	7	-2.52	0	0	1.4	1.4	5.7	8.6	2.1	7.1	0.7	8.6	11.4	5.7	2.1	4.3	1.4	2.9	3.6	11.4	10.7	7.9	1.4	1.4	79.9286
A6NFK2	-0.907258	22.58	0.101	2.52912	248	2	2.06	0	0	4	3.6	5.2	10.1	4	6.9	2	4.8	7.7	6.9	2.4	4.8	6.5	5.6	6.9	8.5	3.2	3.2	0	3.6	58.9919
A6NFN3	-0.625962	45.51	0.877	1.09471	312	3	2.69	1	32.0513	11.9	0	3.8	4.5	3.8	9.3	2.6	3.8	2.9	2.6	1.6	3.5	12.8	5.8	5.1	3.8	9	5.4	0.3	7.4	52.6603
A6NFN9	-0.134462	9.43	0.182	-0.39145	424	8	-0.01	0	9.43396	7.3	3.1	5.2	4.5	4	5.4	2.8	4.7	9.4	10.8	2.8	1.4	4.7	3.8	3.8	8	5.2	7.5	1.9	3.5	87.988
A6NFQ2	-0.0945593	0.76	1.6	-1.28498	919	3	1.4	0	2.82916	9.1	2.7	3.4	5.9	2.8	8.6	3.2	3.8	4.2	12	1.7	3.7	7	4.6	4.6	5.9	4.2	7.2	2.8	2.6	91.5016
A6NFQ7	-0.631414	54.45	0.211	1.03576	191	1	1.65	1	0	4.7	3.1	3.7	4.2	3.7	5.2	5.8	5.8	7.9	8.4	2.1	5.8	9.9	5.2	5.8	7.3	3.7	4.7	0.5	2.6	73.5079
A6NFR6	-0.498867	75.92	0.004	0.974838	353	8	1.94	0	28.3286	4.5	2.5	3.1	5.4	2.5	4.2	3.7	4.5	4.8	10.2	1.4	2.3	13.9	2.5	7.6	14.4	3.7	4.8	2	1.7	75.949
A6NFT4	-0.694156	2.92	0.04	2.34535	308	0	-0.96	0	64.6104	12.7	0.6	3.6	12.7	2.9	3.2	1.6	1.3	4.2	16.2	1.3	1	3.9	11	12	2.3	3.2	3.9	1.9	0.3	92.3377
A6NFU0	-0.113559	4.84	0.139	-2.29695	413	0	1.09	0	0	6.1	4.4	4.8	4.8	6.1	6.5	4.1	4.1	3.4	9	1.7	1.5	5.3	4.6	7.3	5.8	5.6	8.5	2.2	4.4	81.6223
A6NFU8	-0.162245	6.12	0.294	1.03676	196	0	0.38	0	0	7.1	2.6	4.6	7.1	1.5	9.2	3.1	4.1	5.6	10.7	2.6	2	5.6	3.6	7.1	5.1	3.6	10.7	1	3.1	95.9184
A6NFX1	0.517063	10.52	0.252	-5.28915	504	5	0.49	0	21.0317	11.7	2.8	2	2.6	5.8	7.5	2.2	3.8	2.6	12.1	2	0.6	7.9	3.2	4.4	8.5	6.7	9.3	1.2	3.2	100.655
A6NFY4	0.192086	14.15	0.356	-4.39419	417	4	-0.9	0	9.11271	6.2	2.6	2.4	6.2	6.2	4.1	1.9	5.5	4.6	12.2	2.9	3.1	4.6	2.9	5.5	7.7	3.8	8.4	3.6	5.5	99.7842
A6NG13	-0.178877	10.16	0.119	-1.21757	374	0	-0.39	0	24.8663	4	1.3	4	5.6	7	3.5	2.1	8	9.9	10.4	3.2	5.9	1.9	4.5	5.1	7.5	4.8	6.7	0.8	3.7	95.3476
A6NGB7	0.308247	36.08	0.183	-0.823815	291	0	2.19	0	45.7045	16.5	2.1	2.7	4.8	2.4	11.7	3.1	2.1	0.7	17.5	2.4	0	5.8	2.4	7.9	6.2	4.8	4.1	1	1.7	104.845
A6NGB9	-0.674327	86.75	1.11	2.66264	483	11	4.3	0	28.1573	9.1	0.8	2.9	2.3	1.7	7.9	1	2.5	4.8	8.3	0.2	2.3	28.2	4.8	4.8	9.1	5.2	3.1	0.4	0.8	60.1035
A6NGC4	0.418939	24.24	1.11	-2.09205	264	1	0.19	0	19.697	8.3	1.5	3	1.1	2.7	8.3	4.5	2.7	1.5	19.7	1.9	2.3	5.3	2.7	6.1	9.8	5.7	8	3.8	1.1	118.561
A6NGD5	-0.868952	61.9	0.039	2.3202	496	2	1.28	0	0	5.2	3.8	4	9.1	3	5.8	3.8	1.6	7.1	7.9	2.8	3.2	8.5	6.2	7.1	8.5	5.4	5.2	0.6	1	57.3992
A6NGE4	-0.6635	30.83	0.234	1.45275	600	1	4.81	0	0	5.5	2.2	7.5	9.7	4.3	7.5	3.2	3.5	3.5	7.3	1.5	4.3	4	4.7	6.2	8.7	5.8	6.7	1.2	2.8	67.0833
A6NGE7	-0.206936	0	0.048	1.3772	173	1	-0.6	0	0	13.3	1.7	6.4	8.1	5.8	6.9	1.2	2.9	2.9	14.5	1.2	1.7	4	4.6	10.4	6.4	2.9	4	0.6	0.6	92.659
A6NGG8	-0.813742	86.41	0.02	3.02646	1288	23	2.81	0	25.7764	6.6	2.3	3.4	7.5	1.8	6.2	2.4	2.4	5.8	8.4	1.4	2	11.9	6.4	5.8	13.9	6	3.4	1.2	1	58.5947
A6NGH7	-1.02215	22.15	0.063	2.67163	325	7	0.55	0	33.2308	4.6	0.6	4	14.8	4.3	1.2	1.5	3.4	10.2	10.8	2.8	8.3	1.5	4.3	5.5	9.5	6.2	3.1	0.3	3.1	68.7385
A6NGH8	-0.0648325	3.11	0.322	-0.335086	418	0	-0.61	0	6.9378	8.6	3.1	2.9	4.1	1	5.7	3.3	7.2	4.3	13.6	2.6	6.9	4.5	3.8	5.5	6.5	7.7	4.3	0.7	3.6	102.273
A6NGJ6	-0.375724	4.68	0.061	-0.171951	449	1	1.05	0	4.67706	3.8	4.7	6.7	7.3	5.1	3.6	2.7	5.1	3.6	8.9	2.4	4.7	5.3	5.6	5.8	9.6	4.5	6.5	1.6	2.7	77.2383
A6NGN4	-0.00983264	0.63	0.013	-0.490981	478	0	0.24	0	22.5941	4.2	4.8	4.6	5.2	4	3.1	2.1	4.2	5.9	17.8	3.3	3.8	5.2	4.6	7.1	5.6	5.2	5.4	1.7	2.1	105.628
A6NGN9	-0.108036	14.58	0.167	0.005416	336	3	0.03	0	0	9.8	2.1	3.9	5.4	2.1	7.1	1.5	3.9	0.6	12.2	1.5	5.4	6.2	2.7	8.6	7.7	7.1	7.1	2.1	3	93.2143
A6NGR9	-0.0522949	15.44	0.08	0.363794	719	5	1.03	0	40.0556	13.4	1.9	3.5	5.1	1.5	8.8	3.2	0.8	1.3	16.6	1.1	0.8	8.2	4.3	10.2	6.3	3.8	6.8	1.8	0.7	100.918
A6NGU5	0.0487676	8.27	2.47	-1.10645	568	5	0.36	0	11.0915	11.1	1.4	4	5.5	3.7	7.9	2.3	5.6	3.7	9.9	2.1	3.9	4.9	4	5.5	6.3	5.8	8.6	0.7	3	96.5317
A6NGW2	0.102709	14.67	0.115	-2.72799	1772	5	1.9	0	36.6253	8	2.3	3	6.2	3.4	8.1	2	2.7	1.5	18.2	1.5	1.7	9.6	6.5	5	7.3	4.6	5.5	2.3	0.7	105.102
A6NGY3	-0.740252	18.87	0.712	1.95255	159	4	2.11	0	0	5	1.3	1.9	5.7	2.5	6.3	2.5	5.7	6.9	6.3	3.1	3.1	6.9	6.3	8.8	11.3	8.2	4.4	0.6	3.1	64.4025
A6NGY5	0.740752	4.7	0.002	-4.42097	319	4	-0.68	0	25.7053	5.6	3.1	2.8	2.5	5.3	3.8	3.1	10.3	2.2	15.4	3.4	2.5	4.4	2.5	4.1	9.7	6.6	7.2	0.9	4.4	126.803
A6NH00	0.579167	2.56	0.351	-3.93129	312	6	0.5	0	5.44872	9.6	4.2	2.6	2.6	5.8	5.4	3.8	3.8	2.6	15.1	5.4	2.6	3.5	1.6	4.5	8.3	6.1	7.1	1	4.5	103.814
A6NH11	-0.0659794	25.09	0.038	0.58205	291	1	-0.24	0	25.7732	14.8	2.1	2.4	5.5	3.4	8.9	3.1	0.7	1	14.8	1.7	0.3	7.9	3.4	11	5.5	4.5	5.2	2.1	1.7	90.0344
A6NH21	0.471622	16.99	0.01	-5.84582	518	1	0.65	0	20.4633	9.3	6	1.4	2.5	5.4	6.6	3.7	4.2	3.1	14.5	1.7	1.7	6.9	4.1	3.5	8.9	4.2	6.4	2.5	3.5	100.772
A6NH52	0.383568	21.6	0.055	-3.02273	213	1	-1.19	0	8.92019	7.5	2.3	4.7	4.7	8.9	6.6	2.3	6.6	5.6	12.2	1.9	2.8	2.3	3.3	3.3	7.5	4.2	8	3.8	1.4	103.897
A6NH57	0.021229	1.12	0.305	-0.530113	179	2	-1.8	0	0	6.1	1.7	5	7.3	4.5	3.9	3.9	9.5	3.9	10.6	4.5	4.5	2.2	3.9	4.5	6.1	7.8	5.6	2.2	2.2	100.782
A6NHG9	0.756129	2.58	0.119	-4.83866	310	0	0.07	0	33.2258	6.1	2.3	2.9	2.6	7.4	4.5	1.9	10	5.2	15.8	4.8	3.5	3.5	2.6	1.9	7.7	5.5	5.8	0.6	5.2	123.613
A6NHJ4	-1.01661	6.49	0.058	1.7697	632	10	-0.02	1	25.3165	4.3	5.2	3.5	7.1	4.6	5.9	8.9	4.7	11.2	5.2	1.3	4.7	2.5	4.4	6.6	7.1	5.5	3.2	0.6	3.3	52.3259
A6NHL2	-0.173767	2.91	24.8	-0.001432	446	11	0.1	0	0	8.1	3.1	4.9	7.6	5.2	6.5	3.6	4.7	3.6	8.7	2.2	3.4	4.3	3.6	6.1	6.5	6.3	7.6	0.9	3.1	82.6457
A6NHN0	-0.64109	66.46	0.556	1.84787	477	7	3.46	0	29.5597	4.6	2.1	4	7.5	3.6	19.5	0.6	4.2	10.1	6.1	2.3	2.9	9.4	2.9	2.7	6.5	4.6	3.6	0.8	1.9	55.0105
A6NHN6	-0.846501	37.92	0.054	1.62213	443	5	1.28	0	31.1512	5	2.3	4.7	4.3	2.5	3.2	3.4	5	10.2	9.5	1.1	3.8	10.8	4.5	10.2	6.1	5.4	5	2	1.1	75.7111
A6NHP3	-0.94005	37.81	0.05	2.36292	402	4	0.47	0	12.1891	4.7	1.5	4.5	9.5	4.5	2.7	3	3.2	6.7	9.5	3	3	7.7	4.5	12.2	8.2	2	4.2	3.2	2.2	66.4677
A6NHQ4	-0.607124	66.23	0.846	2.568	379	9	3.46	0	34.8285	13.5	2.9	2.9	5	2.9	10	1.3	0.5	2.9	7.9	0.8	1.1	21.4	2.4	9	7.1	4.2	2.4	1.6	0.3	53.2718
A6NHR9	-0.406484	20.2	20.5	-0.234048	2005	26	2.04	1	21.7456	4.8	1.5	6.4	6.8	4.1	6.2	2.2	7.1	8.2	9.3	1.8	4.3	5.9	4.5	4.8	6.2	5.3	6.7	0.9	2.8	88.02
A6NHS7	-0.295882	51.18	0.002	-0.474198	340	1	-0.05	0	7.05882	3.2	4.1	4.4	4.1	3.2	4.4	2.6	6.2	5.9	10	1.8	7.1	5	3.5	3.8	12.6	8.5	5.3	1.5	2.6	81.6765
A6NHT5	-0.487115	82.35	1.11	2.2642	357	8	3.77	1	31.3725	18.2	0.3	3.6	7.3	3.1	5.3	2.8	2	5.9	8.1	0.6	1.7	13.2	3.4	5.3	8.7	3.4	3.9	1.4	2	68.9076
A6NHX0	0.207903	10.03	0.549	-0.730869	329	0	-0.27	0	0	7	1.2	4.9	6.1	6.4	5.8	2.4	7	4	10.6	2.1	3	5.5	3.3	3	10	6.4	8.5	0.6	2.1	100.426
A6NHZ5	0.000389105	0.97	0.024	0.795684	514	2	-0.4	0	28.2101	11.1	2.7	5.1	6	4.1	5.3	2.9	2.3	2.1	17.1	1.2	1.9	6.4	4.9	8.6	5.8	4.7	6	0.4	1.4	104.455
A6NI03	-0.372383	4.9	0.061	-0.127599	449	1	1.27	0	4.67706	3.8	4.7	6.7	7.1	5.1	3.6	2.7	4.9	3.6	9.1	2.7	4.7	5.3	5.1	6	9.8	4.7	6.2	1.6	2.7	76.5924
A6NI15	-0.588601	63.21	1.12	1.8335	193	0	1.57	1	0	7.3	1.6	4.1	5.7	1.6	10.9	1.6	1.6	4.7	11.9	2.1	2.6	7.3	5.2	7.3	12.4	4.7	3.6	1	3.1	70.3109
A6NI28	-0.533638	32.84	0.044	0.911013	874	24	2.03	0	10.984	5.8	1.5	4.3	8.2	4.1	5.1	1.9	5.7	8	8.8	2.4	3.8	5.4	4.9	5	11	5	4.7	0.8	3.3	76.1098
A6NI47	-0.797835	32.28	0.088	1.99813	508	5	4.07	0	9.25197	5.7	3.3	6.9	7.9	1.8	7.1	3.3	3.3	9.3	9.3	3	5.1	3.9	4.9	4.9	8.3	3.9	4.5	1.6	2	67.9724
A6NI56	-0.587406	24.63	0.518	2.48035	674	1	0.96	0	55.638	10.1	1.2	2.5	12	1.3	6.1	1.5	1.2	5.8	15.4	1.8	1.9	3.3	8.6	9.5	7.1	2.8	5.6	1.8	0.4	91.6192
A6NI61	0.525792	9.05	0.004	-3.2626	221	5	-1.83	0	0	9.5	3.6	3.6	2.3	7.2	6.8	3.2	4.1	5.9	13.6	4.5	0.9	4.5	1.4	3.2	6.3	5.4	7.2	1.8	5	99.3213
A6NI72	-0.688235	35.55	9.58	1.72945	391	20	-0.2	0	0	6.4	1	5.1	7.4	3.6	5.4	2.3	5.1	6.6	7.4	2	2.3	7.9	5.4	8.2	7.4	5.4	5.6	1.8	3.6	71.5857
A6NI73	-0.267224	15.38	0.343	0.122442	299	2	1.37	0	0	7	1.7	3.7	5	2.3	8	3	3.3	2.3	11.4	2	3	8.4	5.4	5.7	11	5	6.4	2.7	2.7	82.8428
A6NI79	-0.976014	15.88	0.947	2.67015	296	5	0.44	0	25	5.4	1	3	15.9	2	2	3	3.7	7.1	12.5	1.4	2.7	4.7	9.1	8.4	6.4	4.7	4.7	0.7	1.4	82.3649
A6NI86	-1.25632	64.18	0.048	4.58158	522	0	2.66	0	42.3372	6.7	2.1	1.3	22	0.6	5.6	1.7	1.7	4.4	12.8	1	2.7	4.4	9.6	10.7	5.2	2.9	2.5	1.1	1	70.7088
A6NI87	-0.586364	36.78	0.134	1.57855	242	2	0.49	0	10.7438	9.9	1.7	2.9	4.5	2.9	5	2.5	1.7	2.9	11.2	3.3	2.1	7.4	7	10.7	10.7	6.2	2.9	2.9	1.7	68.2645
A6NIH7	-0.456574	27.49	51	1.51976	251	0	-0.59	0	0	8.8	1.6	6.8	8.8	6.4	8	2.8	4.8	5.2	7.2	1.6	4.4	4.4	2.4	7.2	5.2	4.8	6.4	0	3.6	73.8645
A6NIK2	-0.338014	3.77	0.028	2.39104	292	2	0.77	0	32.1918	8.2	1	5.1	8.9	3.8	9.2	1	2.1	0.7	18.8	1.7	2.4	8.9	2.7	13.4	4.1	2.7	3.1	0.7	1.4	98.6301
A6NIM6	0.561485	12.95	0.075	-6.54411	579	0	-0.43	0	23.6615	4.8	3.6	1.7	4	7.9	6.2	3.1	6.6	3.5	15.7	2.6	5.2	3.3	3.1	2.6	7.6	5.9	7.3	1	4.3	112.763
A6NIR3	-0.481924	32.65	0.158	0.184159	686	6	2.34	0	12.5364	7	2.9	4.4	6.6	2	5.4	3.2	5.1	5.2	8.3	2.3	4.7	5.1	5.1	4.5	12.5	7.1	4.8	1.6	2	73.2507
A6NIV6	-0.275536	8.04	0.076	0.704982	560	1	-0.04	0	24.4643	3	2.1	3.8	8	3.2	5.2	3.6	5.7	8.4	18	1.4	6.4	5	4.5	4.3	6.4	3.4	4.6	0.7	2.1	109.125
A6NIX2	-0.380698	49.3	0.103	1.71006	430	10	4.9	0	29.7674	10.7	5.8	4.2	5.6	2.3	14	2.3	2.1	1.6	8.8	1.2	0.9	9.5	3	10	8.1	2.6	4	0	3.3	64.7907
A6NIY4	-0.910697	33.08	0.271	2.39951	402	0	0.34	0	12.4378	5	1.2	4.2	9.5	4.5	3.7	2.2	3.2	7	9.7	3	2.7	7.7	5	12.4	7.7	1.7	4.5	3.2	1.7	68.408
A6NIZ1	-0.409783	7.61	605	0.751313	184	5	-0.85	0	0	5.4	2.2	7.1	7.1	3.8	6	0	4.9	7.1	9.2	2.7	4.9	2.2	8.2	6	5.4	4.9	9.2	0.5	3.3	87.337
A6NJ08	-0.604327	28.85	0.004	2.58262	208	0	0.21	1	13.4615	11.1	1.9	2.4	5.3	1.9	7.7	2.4	2.9	4.8	10.6	3.4	1	10.6	5.8	13.5	6.2	3.8	3.8	0.5	0.5	74.7115
A6NJ64	-0.917632	41.31	0.149	2.00727	397	0	1.22	0	0	7.3	2.5	3.3	7.6	1.8	4	4.3	3.5	9.3	8.1	2.3	3	9.3	3.3	9.3	6.8	6.5	3.8	2.3	1.8	63.4509
A6NJ78	-0.379115	10.81	4.86	1.14017	407	3	0.05	0	0	8.4	1.2	5.7	5.9	3.4	5.7	2.7	4.9	5.4	11.1	3.9	2.2	4.7	6.6	7.4	6.4	5.7	4.9	0.7	3.2	84.8894
A6NJB7	-0.566292	44.94	1.04	1.82733	356	3	1.34	0	17.9775	6.2	1.1	3.1	3.7	2.5	7	2	1.7	3.4	9.8	1.4	1.4	18	6.2	8.1	10.4	4.5	6.5	2.2	0.8	69.8315
A6NJG2	-0.399048	50.48	0.042	1.77172	315	3	2.09	0	25.7143	14.9	1.3	3.2	7	1.6	10.5	4.4	1.3	1.6	12.4	1.6	1.6	5.7	2.2	10.8	8.6	4.4	3.5	2.2	1.3	78.2857
A6NJG6	-0.586667	76.51	0.117	1.01476	315	4	3.23	1	13.6508	6.3	1	4.4	4.8	5.4	2.5	1	3.2	4.1	8.9	2.2	5.1	8.9	7.6	5.1	13.7	6.7	3.8	1.6	3.8	64.4444
A6NJI9	-0.410801	11.5	0.103	0.518033	287	3	-0.13	0	0	4.9	1.4	5.2	7	3.8	2.8	3.8	4.9	6.6	13.6	2.4	5.6	4.2	3.1	7.3	5.6	6.6	5.9	1.7	3.5	94.0767
A6NJJ6	-0.354749	27.65	0.042	0.382577	358	6	3.18	0	12.2905	8.1	2.2	5	6.4	3.9	6.7	0.6	3.4	2.5	12.3	1.7	0.8	12.3	6.4	5.6	7.8	5.3	2.5	2	4.5	76.3966
A6NJL1	-0.905253	62.22	0.142	2.16922	495	8	2.19	1	0	5.3	3	5.1	7.1	2.8	5.7	4.2	2	6.5	8.1	2.2	4.6	8.5	6.3	7.7	8.9	4.4	5.5	1.2	1	60.4646
A6NJT0	-0.496987	85.88	0.02	2.93474	531	7	4.8	1	44.2561	16.2	1.7	4.5	5.6	3.2	12.2	2.8	0.8	4.7	7.2	1.1	1.3	15.8	2.4	5.1	7.7	2.6	3.4	0.6	0.9	56.8738
A6NJU9	-0.865202	89.37	0.058	3.36546	1138	5	2.68	0	26.4499	6.8	1.3	6.2	4.4	1.3	2.7	3.3	3.7	5.9	10.4	1.2	3.3	17.5	3.8	9	9.2	5.7	3.2	0.6	0.6	70.7733
A6NJV1	-0.754229	3.48	0.303	1.18671	201	0	0.7	0	0	5.5	1	2.5	4.5	6.5	5	4	0.5	6	8.5	3	3.5	10.4	4.5	8.5	6	9	4.5	1	6	53.3831
A6NJW4	0.183273	11.64	0.076	-0.71876	275	4	-0.5	0	0	9.1	2.9	3.3	4.7	2.5	9.8	2.5	1.8	1.1	14.5	2.2	2.5	6.2	4.7	5.8	8	5.5	9.5	1.5	1.8	100.327
A6NJW9	0.00142857	16.59	0.32	-0.608374	211	1	-0.11	0	0	5.7	3.3	2.4	4.3	3.3	5.2	2.4	3.8	6.6	14.2	3.3	1.9	5.2	5.2	7.1	7.6	6.6	8.5	1.4	1.9	97.9048
A6NJY1	0.659929	4.61	0.074	-3.04372	282	2	-1.23	0	8.51064	7.4	1.8	2.5	4.3	5.3	7.4	2.1	8.5	5	14.9	3.9	3.2	3.5	2.8	2.1	7.4	6	8.2	1.4	2.1	122.376
A6NJZ3	0.775641	1.92	0.138	-5.18597	312	3	-1.12	0	23.7179	5.4	2.6	2.6	2.2	8.7	2.9	1.3	9.6	4.5	13.8	5.4	4.2	3.5	3.2	2.2	9.3	8	7.1	0.6	2.9	117.147
A6NJZ7	-0.641306	71.75	0.011	2.11347	1639	13	2.9	0	24.8322	9	2.6	4.3	8.5	1.8	7.4	2.4	1.5	3.6	10.9	1.6	1.9	7.9	7.5	8.4	8.5	3.5	5.4	1.4	1.8	73.0811
A6NK06	-0.031185	4.57	0.495	-0.086561	481	2	0.71	0	10.8108	10.8	1.2	4.6	4.8	4.6	5.4	3.7	5	5	11	1.9	4	6.2	2.9	4.2	8.7	5.6	6.7	1.2	2.5	92.5364
A6NK44	-0.320625	14.37	0.093	1.33295	160	1	-1.17	0	0	3.1	2.5	5.6	7.5	3.8	5	3.1	7.5	7.5	8.8	5	1.9	8.8	2.5	6.2	6.9	5	6.2	1.2	1.9	84.625
A6NK53	-0.933731	21.64	0.141	1.24459	670	11	1.28	1	28.6567	2.1	5.2	5.2	6.4	3.6	7.9	6.6	3.1	8.5	7.2	1	4	2.7	8.4	5.2	9.4	3.9	5.1	1.2	3.3	56.9701
A6NK58	0.0116883	1.73	0.414	0.746517	231	0	-0.37	0	0	8.7	3.9	3	6.9	1.7	10.4	3	3	1.7	15.2	1.3	0.9	6.9	3	10	3.5	6.1	7.8	1.3	1.7	102.165
A6NK59	-0.0582624	4.43	0.017	-0.596896	587	3	0.27	0	14.1397	8.7	2.7	6.1	4.8	3.2	5.6	4.1	5.5	5.6	14.1	2.2	4.6	4.4	3.6	3.7	6.8	4.3	5.3	1	3.6	100.409
A6NK75	-0.862413	2.8	0.05	1.46568	572	26	-0.75	1	27.0979	4.5	6.5	1.2	8.7	4.2	6.1	6.3	4.4	14.3	6.1	1.4	4.7	3.1	3.3	3.5	7	7	2.6	0.5	4.4	53.0594
A6NKB5	-0.20379	50.35	0.203	-4.35841	2137	29	2.81	0	11.2307	5.9	2.3	4.7	5.7	4.3	6	3.1	5.1	4.4	11.1	1.7	3.5	5.3	5.2	4.9	11.2	5.5	6.3	1.5	2.3	87.4544
A6NKC9	-0.698004	62.97	0.002	2.02241	451	4	2.18	0	0	7.5	1.1	5.1	7.3	3.3	8.4	2.7	3.8	3.8	9.3	1.3	2	8.9	6.2	7.1	9.8	5.5	2.7	1.3	2.9	66.2749
A6NKD2	-0.565584	37.99	0.128	1.68558	308	2	0.09	0	12.6623	9.7	1.3	3.2	12.7	3.2	5.2	2.6	3.2	3.9	8.1	3.2	3.9	5.2	4.9	8.1	6.5	2.9	7.5	1.3	3.2	75.7143
A6NKD9	-0.702148	62.05	1.64	2.71931	419	19	4.27	0	0	10.5	1.2	5.5	8.4	1.2	10	3.8	1.4	4.8	12.4	1.2	2.1	6.9	5.5	8.1	9.5	1.4	4.1	1	1	76.253
A6NKF1	-0.256436	11.88	0.813	1.63527	404	6	0.79	0	38.1188	15.3	2.7	4	7.2	2.7	7.2	2.2	0.2	1.5	12.6	1.2	0.7	11.1	4.2	11.6	4	2.7	7.2	0	1.5	86.3614
A6NKF2	-0.514806	67.96	0.213	2.3754	412	1	1.54	1	14.8058	10.7	1.2	2.9	9	2.2	8.5	1	2.4	3.6	10.4	1.9	2.2	14.8	5.1	6.3	6.3	4.6	4.1	0.5	2.2	72.8155
A6NKF7	0.147853	12.88	0.904	0.261237	163	2	0.64	0	33.7423	12.9	2.5	3.1	4.9	2.5	10.4	2.5	0.6	0	19	1.2	0	14.7	1.8	9.2	5.5	2.5	4.9	1.2	0.6	103.681
A6NKG5	-0.413549	22.16	0.17	-0.177604	1358	3	0.61	0	9.42563	6.8	1.3	5	9.4	4.5	4.9	3.5	4.6	2.4	11.7	2.5	3.3	7.2	6.3	6.7	7	3.7	5.2	1.5	2.4	85.4786
A6NKK0	0.705112	1.6	0.318	-5.17167	313	4	-1.14	0	17.8914	5.4	2.6	2.9	2.6	7.7	4.2	2.6	10.2	5.8	14.1	3.2	3.5	4.5	2.2	1.6	8	6.1	7.3	1	4.8	121.438
A6NKL6	-0.4219	80.03	0.071	1.65816	621	7	3.81	0	57.1659	14	1.3	3.4	4.7	1.9	10.1	1.1	3.4	4	7.2	1.1	1.9	10.5	2.7	8.5	14	3.5	4.3	0.6	1.4	68.0676
A6NKP2	-0.126777	11.37	0.086	-0.106592	422	1	-0.19	0	0	10	1.2	3.3	5.2	3.8	7.6	3.3	3.3	4.7	12.3	1.9	1.9	5.9	4.7	7.6	5.5	5.5	7.8	1.2	3.3	93.6256
A6NKQ9	-0.134759	15.51	0.395	0.139947	187	7	1.1	0	19.2513	5.9	6.4	4.3	3.7	2.7	5.9	1.6	2.7	3.2	10.7	2.7	2.1	12.8	2.7	9.1	7.5	5.9	8	0.5	1.6	81.2834
A6NKT7	-0.544425	45.22	1.71	0.748113	1758	146	1.68	0	8.36177	6.8	1.4	5.3	8.9	3.9	5.4	2.2	3.5	8.4	10.5	1.5	4.3	4.2	4.3	4.4	9.9	4.9	6	1.4	2.8	78.7201
A6NKU9	-0.823862	57.38	0.067	3.47991	549	2	2.44	0	32.2404	6.9	3.5	5.6	12.4	2.9	3.5	1.3	1.3	7.1	10.9	1.8	1.5	9.8	2.6	10	6.2	2.4	5.1	2	3.3	69.3078
A6NKW6	-0.04625	34.38	0.341	-1.15711	160	0	1.41	0	7.5	10	5	3.1	5.6	3.8	6.9	1.9	5	5	11.2	1.9	3.8	3.1	5	2.5	10	5	3.1	0.6	7.5	82.4375
A6NL05	-0.837736	6.92	0.062	1.75399	159	0	0.1	0	13.8365	6.3	2.5	3.1	11.3	1.9	6.3	0.6	3.1	5	8.2	1.9	1.3	5	5	13.8	10.1	4.4	6.3	3.1	0.6	68.6792
A6NL26	0.61165	0.97	0.019	-4.52495	309	6	-0.18	0	8.09061	8.4	2.9	3.6	2.3	8.1	5.2	2.9	7.4	3.2	12.9	2.9	3.9	3.6	2.3	2.3	9.4	6.8	6.8	0.3	4.9	107.638
A6NL88	-0.42881	76.39	0.372	1.28774	538	7	4.53	0	36.6171	11.9	1.9	2.4	3.7	1.7	13.2	4.5	0.9	1.7	11.7	1.3	2.4	11.5	2.6	8.7	8.2	5.2	3	0.9	2.6	69.8141
A6NLC5	-0.5464	22.4	0.321	0.988087	250	8	0.71	0	5.6	7.2	5.6	5.6	9.6	2.4	3.2	4.4	5.2	4.4	6	2.4	2	8.8	4	3.2	13.2	4.8	3.6	1.6	2.8	61.32
A6NLF2	-0.970879	56.59	0.139	3.57922	546	0	3.04	0	32.0513	11.9	0.9	4.4	7.3	1.6	7.7	2.6	1.1	6	6.8	1.8	2.2	10.3	6	9.9	7.7	4.6	4.4	1.3	1.5	55.3663
A6NLJ0	-0.414286	54.95	0.935	2.67847	364	1	1.46	0	39.2857	13.2	3.3	4.4	5.2	1.9	10.2	0.8	0.8	1.9	13.5	0.3	0.5	11	1.4	15.1	8.2	3	3.8	0.8	0.5	80.0549
A6NLP5	-0.543915	8.47	1.49	2.65279	189	0	-1.27	0	26.9841	14.3	1.1	7.4	9	3.7	8.5	0	1.6	1.1	12.7	2.6	3.2	4.2	7.4	12.7	3.7	1.6	4.2	0	1.1	82.2751
A6NLU0	-0.14216	4.88	0.154	-0.243829	287	2	0.31	0	0	4.9	4.9	5.6	5.9	4.9	5.9	2.1	5.6	6.3	8.4	2.1	2.8	4.9	4.5	5.9	9.1	3.8	9.1	1.4	2.1	85.5052
A6NLU5	-0.273684	41.4	0.546	1.23337	285	3	0.13	0	15.0877	15.1	0.7	4.9	4.9	1.8	6.3	3.5	2.1	2.8	11.6	1.4	2.5	8.1	3.5	7.4	9.5	5.6	5.6	0.7	2.1	84.7368
A6NLW8	-1.09461	31.37	0.002	2.33399	204	1	-1.11	1	0	5.9	1	2.5	10.3	4.4	5.4	2.5	4.9	6.4	6.4	1.5	4.4	4.4	9.3	9.8	7.4	7.4	2.5	1.5	2.5	56.9608
A6NLX3	-0.638397	31.65	0.108	1.25642	237	1	1.04	0	0	6.3	0.8	5.9	11.4	4.2	3	2.1	2.5	5.1	10.5	2.5	1.3	8	5.1	6.8	8.9	2.5	5.9	3.8	3.4	74.4726
A6NLX4	0.464626	12.24	0.282	-0.319004	147	0	-0.34	0	0	9.5	4.1	4.1	8.2	1.4	6.8	0.7	4.1	0.7	16.3	2.7	1.4	12.2	2.7	3.4	7.5	2	9.5	0.7	2	116.735
A6NM03	0.739241	3.16	0.063	-4.40429	316	6	-0.55	0	23.4177	7.9	2.2	2.2	3.2	4.4	4.7	2.5	7.3	2.5	18	5.4	2.5	4.4	0.9	4.4	7.9	7.3	6.3	0.9	4.7	125
A6NM10	0.33661	22.03	0.071	-2.02559	295	0	-0.6	0	30.1695	13.6	2.4	1.7	4.1	5.8	8.1	3.4	0	2	16.6	2	1.7	6.4	3.4	4.4	7.8	6.8	6.1	1.4	2.4	96.0339
A6NM11	-0.615059	83.35	0.101	0.545928	1700	6	1.94	0	34.8824	5.6	1.2	3.3	9.2	2.7	4.1	3.5	3.9	5.2	9.8	1.4	4	10.4	6.8	3.2	9.4	8.5	5.3	1.1	1.5	74.2235
A6NM28	-0.703125	15.14	0.383	1.95033	416	1	1.41	1	10.0962	9.4	3.8	1.7	5.5	4.1	9.6	5	2.9	6.7	7	0.5	1.2	6.5	5	10.1	10.3	4.1	3.6	0.7	2.2	58.2692
A6NM36	-0.0378738	5.32	0.123	0.125226	301	1	-0.01	0	18.9369	3.7	3	3.3	5	4.3	5	4	4	5.6	18.9	2.7	6.6	5.3	3	6.6	9.3	2.7	5.6	1	0.3	109.435
A6NM43	0.0341113	10.77	0.004	0.117403	557	3	-0.05	0	12.2083	12.2	2.2	3.2	7	2.2	7.7	2.2	3.2	4.5	13.3	2	2.5	7	5.2	4.3	5.2	5.7	7.9	1.1	1.4	99.5332
A6NM45	0.444545	15.45	0.333	-1.61024	220	0	-0.79	0	18.1818	7.3	3.2	4.1	5	5	9.1	1.8	4.5	1.8	18.2	3.2	3.2	3.6	4.5	3.6	6.4	4.1	5.9	4.1	1.4	113.045
A6NM62	-0.700722	46.35	0.229	1.17791	1247	7	0.36	0	24.6993	4.9	2	4.6	7.2	2.6	3.5	3.4	3.9	7.4	11.1	1.6	6.5	5.2	5.6	4.8	10.7	7.5	4.3	0.9	2.2	75.9342
A6NM76	0.604487	1.6	0.566	-4.81652	312	2	-0.77	0	17.9487	5.1	3.2	3.8	1.3	8	2.9	1.9	9.9	5.1	13.8	2.6	3.2	3.2	3.5	2.9	10.9	8.3	6.1	0.3	3.8	115.288
A6NMD0	-0.0758772	64.91	0.01	-0.398514	228	0	0.9	0	12.7193	12.7	3.5	4.4	5.3	4.8	5.7	0.4	3.9	5.3	9.2	1.8	3.1	11.4	2.2	4.4	6.6	6.1	4.8	1.3	3.1	78.0263
A6NMD2	-1.08703	75.63	0.074	3.25045	632	0	3.67	0	30.6962	8.7	1.4	3	12.2	1.4	5.4	4	1.9	9.2	10.3	1.9	4.1	5.1	9.3	6.8	7	2.7	3.8	0.9	0.9	67.231
A6NMK7	-0.385475	2.79	0.152	0.556796	179	3	0.62	1	29.0503	3.4	8.4	5	5.6	8.9	8.4	3.4	2.2	11.7	8.4	3.4	1.7	5.6	4.5	4.5	3.9	2.2	4.5	1.1	3.4	57.7095
A6NML5	0.626289	5.15	0.027	-3.31192	194	0	0.01	0	0	9.3	3.6	1	2.6	7.2	7.7	2.1	6.7	2.1	14.4	1.5	3.1	7.2	2.6	2.6	6.2	6.7	5.2	2.1	6.2	106.649
A6NMN3	-0.789399	59.72	0.038	1.32841	283	1	1.28	0	5.30035	6.4	5.3	4.9	11.7	3.5	5.3	2.1	2.5	1.8	5.7	2.1	2.1	6.4	7.8	7.4	11	4.9	4.6	2.1	2.5	51.3781
A6NMS3	0.642368	6.54	0.289	-4.78356	321	3	-1.39	0	17.4455	6.2	4.7	2.5	4	7.2	3.4	2.5	10.3	4.4	14	4.7	4.4	3.4	1.2	3.7	6.5	6.2	5	0	5.6	115.452
A6NMS7	-0.608706	84.29	0.088	0.546767	1700	2	1.85	0	35.0588	5.6	1.2	3.2	9.2	2.7	4.1	3.4	3.9	5.2	9.9	1.4	3.9	10.4	6.8	3.2	9.4	8.7	5.3	1.1	1.5	74.6235
A6NMX2	-0.566116	22.31	0.5	1.62855	242	2	-0.8	1	0	7.9	1.2	4.1	10.7	2.5	7	2.9	3.7	7	10.7	1.2	3.7	2.9	3.3	7.4	6.6	5	6.6	3.7	1.7	83.4298
A6NMY6	-0.546608	5.9	1276	1.44693	339	44	-0.77	0	9.14454	5.9	0.9	9.1	6.5	2.1	5.6	1.2	6.8	9.4	9.7	2.7	2.9	2.1	4.4	5.9	7.7	5.3	5.9	0.3	5.6	87.4336
A6NMZ2	-0.456463	27.89	0.004	1.56002	147	0	0.65	0	0	7.5	2	6.8	6.8	3.4	3.4	2	6.8	10.2	11.6	4.1	4.1	4.1	4.1	4.8	9.5	6.1	2	0	0.7	85.034
A6NMZ7	-0.358904	25.19	0.582	-0.534777	2263	16	5.34	0	20.8573	6.6	1.3	6.1	6.6	4.8	10.2	2.1	5.9	6.7	8	2.1	4.1	4.8	4.2	5.3	7.5	4.6	6.9	0.3	2.1	80.6452
A6NN14	-0.890096	9.66	0.202	1.63322	1252	6	-0.01	1	37.3802	4.7	6.9	1.4	8.8	5.2	5.6	7.7	5.2	17.7	4.8	1.1	2.7	3.4	1.9	3.8	6.5	6.3	2.6	0.7	3	51.2939
A6NN90	-0.475601	75.43	0.152	1.79116	582	0	1.79	0	10.8247	8.9	1.2	5	7.9	2.2	8.2	1.9	1.7	2.4	10.1	1.7	0.7	10.8	5	8.1	9.3	4.6	6.9	2.4	0.9	75.1031
A6NNA5	-0.612928	66.92	0.204	1.46546	263	3	1.01	1	0	9.9	2.3	3	6.8	4.6	6.5	1.9	0.8	4.9	8	1.9	3.4	9.9	6.1	6.5	8.7	7.6	4.9	0.8	1.5	58.327
A6NNF4	-0.886179	4.88	0.061	0.974337	738	8	-0.62	1	27.7778	3.5	6.5	1.4	9.6	4.7	6.1	6.5	5.4	14.8	5.1	1.1	3.3	3.5	2.7	3.5	7.5	7.6	2	1.4	3.8	50.6369
A6NNL0	-0.480866	60.71	0.081	1.32208	878	4	2.22	0	13.8952	8.4	2.5	2.7	6.7	2.6	8.9	1.9	0.9	4.6	10.4	1.9	1.5	13.9	6.3	5.4	8.5	4.8	5.5	1.6	1	68.2574
A6NNL5	-0.148408	19.11	0.561	-0.133153	157	1	0.32	0	0	9.6	2.5	1.9	3.8	5.7	5.1	4.5	1.9	3.2	12.1	1.3	3.8	6.4	3.2	8.9	5.7	5.7	7	3.2	4.5	84.5223
A6NNM3	-0.644478	72.24	0.011	2.13027	1639	0	2.9	0	24.8322	9	2.6	4.3	8.5	1.8	7.4	2.4	1.5	3.6	10.9	1.6	1.9	7.9	7.5	8.4	8.5	3.6	5.4	1.4	1.8	72.8432
A6NNM8	-0.667485	44.91	0.353	1.97559	815	3	1.6	0	8.71166	6.3	2.9	4	8.2	2.8	5.3	2.7	4.7	6.5	9.9	2.7	4.3	5.6	5	8.7	6.9	4.9	4	1.1	3.3	74.9448
A6NNN8	0.88046	10.11	0.201	-6.24527	435	1	-0.23	0	10.3448	9.2	3.4	1.8	3	6	8.5	0.9	6.2	1.8	13.8	3	0.7	6.2	2.8	3.2	9.2	4.6	10.3	2.5	2.8	117.195
A6NNP5	-1.10561	14.49	0.0153333	2.4614	214	9	-0.98	0	11.6822	3.3	0	2.8	12.6	0.9	3.3	2.3	3.3	11.7	11.7	1.9	6.1	3.3	7.5	7	6.5	5.1	6.1	0.5	4.2	79.2056
A6NNS2	0.208974	9.29	0.013	-1.02566	312	1	-0.73	0	11.2179	7.7	2.2	3.8	6.1	5.8	6.1	1.6	6.1	7.1	9.9	2.6	3.8	4.8	2.2	4.5	5.4	4.5	11.2	1.3	3.2	102.724
A6NNT2	-0.425855	64.5	0.06	1.75916	1141	5	2.42	0	19.369	10.2	1.1	6.3	6.3	1.7	5.9	2	3.8	6.7	11.4	2.6	2.1	9.2	5.9	5.4	6.8	4	5.8	1.5	1.3	86.0736
A6NNW6	-0.25616	18.31	0.337	0.645146	628	6	0.58	0	0	7	2.1	3.5	9.1	2.4	6.8	2.5	6.4	7.6	10.7	2.9	4.1	6.7	4	2.7	7	6.1	5.7	0.3	2.4	90.512
A6NNZ2	-0.340991	10.36	205	0.747692	444	24	1.18	0	0	7.9	2.5	5.9	8.3	5.2	7.4	2.9	4.3	2.7	7.2	4.1	4.5	4.5	4.7	5	6.1	6.8	6.1	0.9	3.2	70.3153
A6NP11	-0.932323	2.63	0.406	1.50971	495	12	-0.38	1	34.1414	3.2	6.5	1.8	8.5	4.2	6.5	6.1	3.6	12.9	6.1	1.2	4.2	3	3.4	5.1	7.7	8.7	2.8	0.6	3.8	49.2525
A6NP61	-0.817757	53.89	0.42	1.8563	321	5	1.06	0	16.8224	5.6	5.9	4.4	5.3	2.8	7.5	1.6	2.2	7.2	6.9	1.2	2.5	10.9	6.9	8.4	8.1	3.1	4.7	1.2	3.7	54.3925
A6PVC2	-0.434235	40.12	0.018	0.867849	850	6	0.71	0	0	8.6	3.1	6	5.5	2.8	6	2.4	3.9	5.5	9.8	1.6	3.2	7.4	4.8	7.2	7.6	4.2	6.1	1.9	2.4	79.5529
A6PVI3	-0.65817	34.64	0.544	1.42203	153	0	1.35	0	0	3.3	4.6	7.2	7.8	7.8	9.8	2.6	5.2	7.2	7.8	2.6	3.3	0.7	5.2	7.8	6.5	5.2	2	1.3	2	59.9346
A6PVS8	-0.573077	6.73	0.186	0.707786	624	3	-0.36	0	26.6026	4.5	1.8	3.4	7.9	4.8	2.9	3.8	7.2	13.1	10.7	1.6	6.2	3.2	4.2	5.4	5.3	4	5.4	1.3	3.2	90.2885
A6PVY3	-0.841139	44.94	0.004	2.17291	158	0	-0.16	0	0	5.1	1.3	4.4	13.3	5.7	6.3	1.3	5.1	7.6	5.7	1.3	3.2	4.4	7	4.4	8.2	6.3	4.4	1.3	3.8	59.8734
A6QL63	-0.181431	17.48	0.074	-0.418304	1104	14	3.96	0	14.0399	10	2.8	4.3	6.5	2.8	7	4.1	3.8	4.2	11.8	2.4	3.3	5.7	3.7	5.4	8.3	4.3	5.9	1	2.7	87.7989
A6QL64	-0.891488	79.91	0.048	3.89641	1941	24	1.27	0	27.7692	6.6	1.6	6.5	9.2	1.5	4.2	1.6	5.2	12.1	8.4	1.4	4.2	3.5	5.8	5.3	9.8	6.1	5	0.3	1.6	74.2715
A6XGL0	-0.115385	16.39	0.041	0.988014	299	5	0.34	0	0	10.7	2.7	5	7	3.3	7.7	2	2	2.3	12.7	1	1.3	7.4	4	8	6.4	5	8	1.3	2	91.3712
A7E2F4	-0.994136	76.39	0.369	3.41141	631	13	2.11	0	21.5531	8.6	2.1	3.8	12.7	0.8	7.3	2.9	1.6	7.1	11.1	1.3	2.7	5.2	8.9	7.3	8.6	2.9	3.8	0.6	1	69.0333
A7E2S9	-0.503101	24.81	0.304	1.45518	258	1	-0.44	0	0	10.5	2.3	5.8	7.4	1.2	4.7	2.7	4.3	7.8	9.7	1.9	6.6	4.3	3.9	5.4	5.8	5.8	7	0.8	2.3	85.1163
A7E2U8	-0.841748	8.41	0.005	2.36646	309	6	1.08	0	12.2977	6.8	0.3	4.2	5.8	5.5	9.4	2.3	3.9	12.3	5.5	2.6	5.8	8.7	1.9	3.9	8.4	3.6	3.2	0	5.8	52.7832
A7E2V4	-0.382852	45.24	1.29	0.374232	1837	40	3.68	0	38.0512	10.1	2.1	3.5	6.9	3	8.9	3.3	2	3.6	9.6	2	2.3	9	3.8	5.7	10.1	5.1	5.3	1.5	2.2	71.0289
A7E2Y1	-0.7176	55.47	1.55	2.9121	1983	20	0.48	0	59.8588	11.4	1.1	4.7	13	2.4	4.6	2	2.5	8	12.9	2	3.2	2	6.8	7.9	4.7	3.9	4.4	0.6	1.9	84.2511
A7KAX9	-0.649497	78.01	1.08	1.53548	2087	114	2.71	0	24.5807	7.1	1.4	4.9	7	2.8	5.3	3.9	2.9	5.2	7.4	2.2	3.3	9.1	5.1	5.2	11.6	5.3	6.4	0.6	3.3	65.9368
A7MBM2	-0.0328337	29.05	0.065	-3.63392	1401	17	2.65	0	43.1834	9.3	2.9	4.1	3.6	4.4	7.6	2.6	1.2	1.9	14.6	1.6	1.6	8.9	4.4	6.4	10.5	4.8	5.4	1.8	2.4	86.531
A7MCY6	-0.683089	58.86	0.217	2.44277	615	21	4.18	0	12.0325	8.9	2.6	3.6	9.4	2	6.5	2.3	2.9	2.8	10.4	1.1	1.3	12	7.3	8	9.6	2.8	3.3	1	2.3	70.374
A7MD48	-1.60311	95.58	0.004	5.82181	611	42	4.19	1	43.3715	4.1	1.3	2.3	4.4	1.1	4.7	2.3	1	8	3.4	0.8	1.6	8	3.4	16.9	26.5	5.2	1.5	0.5	2.8	25.5974
A7XYQ1	-0.533792	79.61	0.137	2.08123	873	4	3.23	0	16.6094	8.2	2.5	3.8	5.8	2.1	8.2	2.7	4.4	5.3	6.9	2.9	4.8	16.6	2.9	4.6	8.2	3.3	4.8	0.5	1.5	65.9794
A8CG34	-0.352563	96.58	3.91	1.18422	1229	73	5.12	0	51.7494	12.4	0.6	1.8	2.7	5	8.5	1.1	2	3.9	6.9	0.7	2.1	13.5	3.9	4.6	15.4	10.5	3.2	0.5	0.8	56.1595
A8K0R7	-0.495314	73.37	0.408	2.13431	811	8	1.24	0	0	8.4	2.5	4.3	8.3	2.6	7.9	2.7	2.1	4.8	11.1	1.2	2.1	7.8	5.4	6.4	10.6	4.7	5.7	0.2	1.2	76.2885
A8K0Z3	-0.547742	43.23	2.475	2.38011	465	1	1.31	0	11.3978	8.2	0.2	5.2	7.5	2.6	8	1.5	4.1	6	8.8	1.7	1.3	11.4	7.7	4.7	8.6	3.4	6.5	0.4	2.2	77.2043
A8K2U0	-0.157634	6.53	4.11	-3.15923	1454	7	0.81	0	19.0509	6.3	1.7	4.5	5.6	4.6	6.7	1.7	4.5	5.4	9.9	2.1	4.1	5.8	5.6	2.9	8.4	6.9	7.8	1.2	4.3	85.055
A8K4G0	-0.2801	30.35	0.005	-0.386912	201	3	-0.08	0	0	4.5	2.5	5	6.5	2.5	7.5	1.5	6	5.5	9	3	2.5	6	4.5	6	7.5	7	7.5	3.5	2.5	84.3284
A8K5M9	-0.622286	6.86	0.459	2.0856	175	0	0.26	0	0	6.3	1.1	4	7.4	4.6	5.1	1.7	1.7	2.9	13.1	1.1	1.7	10.9	5.1	9.7	12.6	4.6	2.9	1.1	2.3	72.5143
A8K7I4	-0.279431	7.11	5.79	-0.508316	914	17	1.06	0	20.7877	6.8	1.4	5	5.4	3.5	7.5	1.5	7.1	5.8	8.5	1.3	5.8	5.4	5.4	3.6	7.7	7.9	6.3	1.5	2.5	86.2035
A8K855	-0.455962	17.65	0.416	0.209395	629	8	0.76	0	0	4.5	3	5.6	8.3	4.3	4.6	1.7	6.4	8.4	9.5	2.7	5.7	4.1	3.3	4.3	7.5	6.8	4.6	1.4	3.2	79.8251
A8K8P3	-0.689694	22.3	0.066	-0.062345	1242	8	0.72	0	41.9485	10.8	1.9	1.5	6.4	3.1	3.1	4.9	1.9	5.4	11.8	1.8	1.4	3.5	10.3	11.9	4.9	4	4.8	4	2.3	78.4944
A8K8V0	-0.770123	25.68	0.034	1.6184	405	5	0.82	1	15.8025	7.4	4.9	3.5	7.2	4.9	7.2	4.9	2.5	4.4	5.9	0.7	1	9.9	4.2	10.9	8.1	3	4.4	2	3	53.037
A8K979	-0.473951	46.31	0.352	0.752046	691	8	0.99	0	11.4327	4.2	3	3.5	6.1	3.3	4.8	2.9	5.9	8.4	9	2	5.8	6.2	4.9	4.2	11.4	5.5	5.6	1.4	1.7	78.6975
A8MPP1	-0.370562	17.09	0.67	0.718651	907	15	0.18	1	7.38699	8.6	2.3	3.5	9.3	3.7	6.2	2.4	4.1	6	10.9	2.2	2.6	4.4	7.4	6.8	6.6	3.3	6.9	0.4	2.2	87.2216
A8MPS7	-0.0631579	6.81	0.431	1.11326	323	7	0.31	0	12.6935	12.7	3.1	4	7.7	4	10.5	3.7	0.6	0.6	12.1	1.5	0.6	7.1	2.5	9	5.6	5	7.7	0.9	0.9	84.644
A8MPX8	-0.442857	37.3	0.048	0.067948	630	0	0.28	0	0	5.4	2.2	3.8	7	4.8	4.8	3	5.6	8.3	8.4	2.1	5.9	4.1	3.8	4.6	8.4	7.3	6.2	1.4	3	77.8254
A8MPY1	-0.0411135	20.56	0.115	-3.35156	467	2	-0.1	0	11.7773	4.5	1.5	5.8	4.1	7.1	3.2	3	6.9	4.7	8.4	4.7	4.1	3	2.8	5.8	10.7	6.2	7.5	1.9	4.3	85.5246
A8MQ03	-0.404861	36.11	0.381	0.229833	144	10	4.1	0	26.3889	8.3	11.8	2.8	3.5	0.7	7.6	5.6	3.5	2.1	4.9	2.1	2.8	14.6	9	3.5	7.6	2.8	4.2	0.7	2.1	52.9167
A8MQ14	-0.932294	6.97	0.146	1.02328	1090	15	0.26	1	38.9908	2.9	6.8	2.8	7.9	4.3	8.1	8	4.7	9.9	5.5	0.9	0.7	3.7	6.8	5.6	7.7	7.5	1.8	0.6	3.9	47.9725
A8MQ27	-0.192973	23.24	0.227	0.748223	555	6	1.59	0	30.2703	10.8	3.4	5.8	3.6	3.6	8.8	2	2.3	2	10.3	0.7	2.7	10.5	2.3	9	7.6	4.9	7	1.1	1.6	80.3784
A8MQB3	-0.662443	14.03	0.038	2.40883	221	1	1.39	0	13.1222	8.6	4.5	3.2	5	1.8	5.4	3.2	2.3	5	10.4	1.8	0.9	13.1	4.1	10	12.2	4.1	1.8	1.8	0.9	63.2579
A8MQT2	-1.02405	76.95	0.369	3.38653	603	0	3.17	0	22.2222	9.8	2	3	13.1	1	7	3	1.7	8.1	10.4	1.3	3	4.3	9.1	7.1	8.1	2.7	3.5	0.8	1	67.0978
A8MT33	-0.780992	24.38	0.376	3.02842	242	1	0.37	0	17.3554	9.5	0.4	4.5	17.4	0.8	5.8	2.9	2.9	7	14	2.5	1.7	5	5.8	7.9	5	1.2	5	0.8	0	89.9587
A8MT65	-0.811949	18.75	0.07	1.1426	544	9	-0.06	1	20.9559	3.3	4.8	2.4	8.8	3.3	4	6.1	5	10.1	6.6	3.1	4.4	2.9	5.3	5	8.8	6.8	4	1.5	3.7	60.2022
A8MT66	-0.900606	26.06	0.182	1.40402	165	1	-1.09	0	0	1.2	1.8	4.8	8.5	6.1	3.6	4.2	4.8	6.7	6.7	2.4	8.5	6.1	6.1	4.8	9.1	6.1	4.8	1.2	2.4	60.1818
A8MT70	-0.865	67.12	0.084	2.74802	800	13	0.97	0	37.75	3.9	2.4	5.9	11	3.4	3	2.4	3.9	9.5	10.1	1.1	5.8	3.8	5.5	4.2	11.5	5.4	4.5	0.8	2.1	71.525
A8MTA8	-0.519273	5.82	0.093	1.01924	275	1	1.39	0	12.3636	5.1	1.1	2.9	5.8	6.2	9.5	3.6	1.8	4	10.2	1.5	2.2	12.4	6.9	5.5	6.5	5.5	5.1	0.7	3.6	66.6545
A8MTB9	-0.302865	3.12	0.069	-0.15429	384	0	0.77	0	0	5.5	2.6	6.2	4.7	2.1	6	2.6	5.7	2.1	9.1	3.4	4.9	5.5	4.2	7.3	9.4	5.7	7	2.6	3.4	83.75
A8MTJ3	-0.349153	11.58	6.66	0.227025	354	6	-1	0	0	6.2	2.5	6.2	8.2	5.1	5.1	2.5	7.1	8.2	8.5	2.8	4.8	1.7	4.2	4	7.1	5.9	5.6	0.6	3.7	83.1921
A8MTL0	-0.117568	2.03	0.001	-0.51033	148	0	-2.12	0	6.75676	7.4	4.1	0	7.4	2	2.7	2.7	6.8	4.1	12.2	3.4	2	2	8.8	11.5	3.4	2	8.1	6.8	2.7	104.73
A8MTL3	-0.590333	55	0.052	0.643918	300	3	3.3	0	13.6667	5.3	2.7	2	5	5.7	6.3	3.7	3	5.7	8	1.3	2.3	6	7.3	7	13.7	7.3	4.3	1	2.3	60.8
A8MTQ0	-0.439442	78.88	0.674	1.27306	251	2	2.75	1	12.3506	12	2.4	3.2	5.2	3.6	7.2	1.2	1.2	3.6	8	0.8	2	12.4	5.2	8	10	4.4	6.4	2.4	1.2	66.1753
A8MTY0	-0.889984	2.75	0.089	1.26375	619	10	-0.68	1	27.6252	4.2	6.3	1.5	8.4	4.2	6.1	7.3	5.3	14.1	5.3	1	5	2.9	3.9	3.1	6.8	7.6	2.6	0.5	4	53.2795
A8MTY7	0.101775	0	0.733	-1.88468	169	0	3.42	0	47.3373	1.8	32.5	0	0.6	0.6	3	1.8	1.2	0.6	1.2	0.6	1.2	11.2	7.7	3.6	12.4	14.8	3	0.6	1.8	19.5858
A8MTZ7	-0.739405	37.92	0.379	1.65693	269	1	1.59	0	0	5.2	1.9	7.8	6.3	4.1	4.5	2.2	5.2	4.8	8.9	1.5	4.5	7.4	7.1	5.9	11.5	5.2	3	2.2	0.7	68.9219
A8MUH7	-0.560697	21.14	5.64	1.86282	402	9	0.79	0	0	5.5	0.7	6.7	9	2.2	9	3.2	4	8.5	7.7	2.2	3.7	5	3.7	3.5	8.2	4.5	9.5	0.5	2.7	78.4826
A8MUK1	-0.559623	39.06	0.013	0.317449	530	4	0.11	0	5.4717	8.1	3.2	4.5	5.8	2.5	5.1	5.5	2.6	5.8	10.4	2.3	3.4	5.1	7	5.5	7.9	5.7	5.3	1.1	3.2	74.2075
A8MUM7	-0.0260563	0.7	0.1	-0.472272	142	0	-0.83	0	0	1.4	1.4	4.9	7.7	4.9	4.9	2.8	7	3.5	9.2	3.5	5.6	4.9	2.1	6.3	7.7	2.1	12.7	1.4	5.6	101.338
A8MUP6	-0.00784983	27.99	0.09	-1.87925	293	0	0.15	0	0	8.2	3.8	3.8	5.5	4.4	7.8	3.1	4.1	3.1	10.6	2.4	2.7	4.4	5.8	5.1	9.2	3.8	7.5	3.4	1.4	87.2014
A8MUV8	-0.86493	2.81	0.065	1.4157	499	3	0.13	1	26.4529	3.8	7.8	3.4	7.8	4.4	5.6	5.6	4.6	13	6.6	1	3.6	3.2	2.4	6.4	7	7	2	1	3.6	53.3868
A8MUX0	0.0692456	27.47	0.749	-1.37215	517	2	1.87	0	50.8704	5.2	18.4	1.5	4.8	1	1.7	0	2.9	1.9	2.7	0.4	0.6	13.9	5.2	3.9	18.6	6	8.9	0.2	2.1	52.9014
A8MUZ8	-0.776667	12.67	0.078	1.21548	300	2	-0.63	1	6.33333	3.3	5	3.3	6.3	3.7	5.3	6.3	4.3	9.7	9.3	3	3.7	2.7	5.3	6.3	9.3	7	2	0.7	3.3	62.4333
A8MV23	-0.017217	5.19	0.489	-1.56485	424	5	0.6	0	0	7.3	1.7	3.3	5.2	6.4	7.1	3.3	4.5	3.8	11.8	1.7	3.1	5.7	5	4.2	8.7	7.3	6.1	1.7	2.4	88.5613
A8MV24	-0.628571	1.95	0.04	0.794476	154	0	2.28	0	0	7.1	0.6	5.8	1.9	5.2	10.4	5.2	3.9	2.6	7.8	0.6	3.9	5.2	5.8	9.7	5.8	5.2	5.2	1.9	5.8	67.7922
A8MV65	-0.678834	77.3	0.094	1.35123	326	1	2.99	0	20.5521	8.3	1.5	4.3	5.8	3.1	5.5	8	1.8	3.1	5.5	3.1	1.2	12.6	5.8	2.5	10.7	6.4	4.9	1.8	4	51.227
A8MVA2	0.0975	0	1.72	-2.19401	160	0	3.48	0	44.375	1.2	31.2	0	0	0	4.4	2.5	1.2	0	1.2	0.6	1.2	10	8.1	3.1	14.4	13.1	3.8	0.6	3.1	21.875
A8MVS1	-0.767667	9.67	0.024	1.36693	300	0	-0.24	1	6	3.3	5	4.3	6.3	3.7	5.3	6	5	10	9	3	2.7	3	5	6.7	9.3	6	2	0.7	3.7	63.7333
A8MVS5	-0.101739	15.65	0.339	-0.324635	230	7	1.6	0	0	8.3	1.7	4.3	3.5	5.2	6.5	1.3	3	3	10.9	1.7	3.9	9.1	4.8	4.8	11.3	7.4	6.5	1.3	1.3	81.4348
A8MVU1	-0.731148	35.79	9.58	1.80596	366	5	0.04	0	0	6.8	1.1	5.5	7.7	3	4.9	1.9	4.9	6.8	7.4	2.2	2.2	8.2	5.5	7.9	7.9	5.5	5.2	1.9	3.6	69.8361
A8MVW0	-0.3046	57.99	0.227	0.39724	826	21	4.53	0	31.477	9.9	0.7	3.9	5.8	2.3	10.4	2.1	2.4	2.3	11.9	1.1	1.6	11.1	3.4	7.6	9.9	4.8	5.6	1.3	1.8	81.7918
A8MVW5	-0.162987	15.15	0.047	-1.44901	462	8	0.61	0	0	4.5	1.9	5	4.8	3.9	7.1	3.7	6.7	5.2	8	2.2	3.7	6.9	5.2	2.8	7.6	6.5	8.7	0.9	4.8	87.0563
A8MVX0	-0.679976	68.25	0.035	1.67365	844	10	1.64	0	10.0711	8.6	1.5	3.4	10.1	3.7	5.5	2.5	3.1	7.3	9.6	2.1	3	7.1	6.8	5.3	9	3.7	4.1	0.8	2.7	70.1185
A8MW92	-0.876794	71.98	0.732	2.98674	1017	33	1.57	0	16.9125	5.7	2.3	6.9	8.8	2.6	4.7	2.5	3.9	10	8.1	1.9	3.9	6.4	4.5	4.9	10.2	4.1	4.5	1.4	2.7	65.6047
A8MWP4	-0.822807	23.68	0.002	2.34678	228	0	2.47	0	17.1053	7.9	3.9	3.1	3.1	1.8	8.3	4.4	0.9	2.6	7	2.6	1.8	17.1	9.2	8.3	10.1	2.6	3.9	1.3	0	50.1316
A8MWP6	0.0227545	0	0.003	0.367612	167	0	0.46	0	4.79042	7.8	3	3	5.4	3	12.6	1.2	1.2	1.8	15.6	4.2	0.6	6	6	5.4	9	4.8	4.2	4.8	0.6	85.3293
A8MWX3	-0.58805	43.61	1.66	2.53502	477	1	1.39	0	11.1111	7.8	0.8	5.5	6.9	2.1	8.4	1.5	4.2	6.3	9	1.9	1.5	11.1	6.9	5.5	9.2	3.6	5.5	0.8	1.7	75.0734
A8MWY0	-0.403984	11.95	0.196	-1.38646	1029	9	2.65	0	5.73372	5.4	5.7	4.9	6.6	5.1	8	1.8	4.9	6.7	5.2	1.7	5.2	5.9	2.7	3.2	9.2	7	5.2	2.1	3.4	59.6987
A8MX76	-0.365205	6.58	0.014	-0.852779	684	5	-0.17	0	3.21637	5	2	4.2	6.6	5.6	6	2.3	3.8	6	13.2	2.3	3.5	4.8	6.6	6.4	6.9	3.8	4.8	3.2	2.9	85.1023
A8MXD5	-0.521379	39.66	0.051	1.61343	290	2	2.26	0	0	4.5	4.8	5.2	8.6	4.5	9	2.4	4.1	6.6	8.3	1.7	5.2	3.1	3.8	7.6	8.3	3.8	6.9	0	1.7	72.8966
A8MXK9	-0.0385542	0	0.0346667	0.498244	166	0	1.03	0	4.81928	7.8	3	3	5.4	3	12.7	1.2	1.2	1.8	14.5	4.2	0.6	6.6	5.4	6	9	4.8	4.2	4.8	0.6	81.1446
A8MXT2	-0.758036	38.1	0.077	2.12024	336	1	1.45	0	0	8.3	0.9	3	9.5	3.6	7.1	1.2	2.1	6.2	8.6	2.4	3	6.5	5.4	8.6	10.7	3.9	4.8	0.6	3.6	63.9286
A8MXV4	-0.34	6.67	4.69	0.661498	375	3	1.21	0	11.2	8	1.6	5.3	5.9	5.3	6.4	4.3	2.4	2.9	12.3	1.3	1.3	11.2	1.9	8.3	6.9	5.1	4.8	2.7	2.1	79.12
A8MXV6	-0.175801	43.77	0.497	0.3081	281	6	1.44	0	0	11.7	2.5	1.4	6.4	2.8	9.6	2.1	3.9	2.5	10.7	1.4	2.1	10.7	4.6	8.5	6	4.6	5.7	1.4	1.1	85.1601
A8MXZ3	0.0544	2.4	0.578	-2.64921	250	1	4.83	0	51.2	0.4	35.6	0	0.4	0.4	2.8	1.6	1.2	0.4	0.4	0.4	1.2	11.2	8.4	4	12.4	15.6	2	0.4	1.2	12.44
A8MY62	-0.06	2.4	0.004	0.125866	500	6	1	0	26.6	11.6	0.8	4.6	4.4	4	8.4	3	1.6	2.4	15	1.6	2.4	9.4	2.8	7.4	4.8	4.6	6.2	1.4	3.6	94.32
A8MYJ7	-0.125972	4.24	0.209	1.30404	566	0	-0.28	0	32.6855	15.4	2.8	5.3	6.2	1.9	8	3	1.6	2.8	17.3	0.9	0.7	4.1	6.7	8.5	5.7	3.5	3.9	0.5	1.2	100.371
A8MYP8	-0.606324	1.58	0.263	1.65797	253	2	2.61	0	14.6245	11.1	1.2	3.6	1.2	3.6	11.1	2.8	2.8	2.8	4.7	0.8	2.4	14.6	3.6	9.5	6.3	6.7	4.7	1.6	5.1	54.1107
A8MYU2	0.00626632	25.59	0.051	-3.79596	1149	5	0.25	0	14.3603	4.7	2.5	4.4	5	6.5	5	1.9	7.8	5.6	11.1	1.8	4.7	4.4	3.5	4.4	10.2	6.7	5.4	1.3	2.9	94.3429
A8MYV0	-0.681319	30.14	0.039	1.10067	355	6	0.97	0	10.1408	6.2	1.4	5.4	6.2	4.8	6.2	3.4	5.4	10.1	7	0.6	3.1	7	3.7	5.9	4.5	4.8	9.3	1.1	3.9	77.0604
A8MYX2	-0.394857	12.57	0.014	1.30381	175	1	3.1	0	0	9.1	3.4	0.6	9.1	0	12	4.6	3.4	5.1	7.4	1.7	1.7	9.1	3.4	2.9	10.3	6.3	5.7	3.4	0.6	68.0571
A8MYZ0	-0.355435	22.61	0.007	-0.059356	460	1	0.08	0	0	5.7	2	4.6	7	5.4	7.6	2.8	5.4	5.4	11.1	2	4.6	3.5	5.4	5	8.5	5.7	3.9	2	2.6	81.4348
A8MYZ6	-0.368699	74.59	0.182	2.46558	492	10	2.11	1	41.2602	16.5	0.8	6.7	4.7	2.2	11.6	1.4	1.8	3.9	10	2	2.2	13.2	1.8	5.3	7.7	1.8	2.4	1.8	2	69.5122
A8MZ25	-0.954268	45.73	0.217	2.71362	164	0	0.79	0	14.6341	7.9	2.4	3	4.9	3.7	11	2.4	1.2	4.9	6.1	1.8	1.2	12.2	3.7	14.6	9.8	3	3.7	2.4	0	47.0732
A8MZ36	-0.894684	8.31	0.475	2.18584	301	0	1.69	0	10.9635	9.6	2.3	4.7	11	1	7.6	4.7	2.7	3.3	9.6	1.7	1.3	5.6	11	9	4.3	3.3	4.7	1.3	1.3	71.0631
A8MZ97	-0.389175	19.07	0.11	0.484959	194	1	-0.53	0	0	4.6	2.6	3.6	10.8	3.1	5.2	1.5	5.7	7.2	9.3	3.1	4.6	5.7	4.6	6.2	4.6	7.2	8.8	0	1.5	88.3505
A8MZA4	-1.91271	81.63	0.046	6.52142	724	0	1.09	0	68.9227	3.2	0.6	1.4	27.3	0.1	1.1	3.3	4.7	12	5.5	5.2	1.4	2.3	13	8.3	2.2	3.2	1.5	3	0.6	47.4448
A8MZF0	-0.591843	79.15	0.217	1.87581	331	0	2.62	0	20.5438	10.3	0.9	0.9	7.9	1.5	6	2.4	1.2	1.8	6.6	1.5	1.5	20.5	4.5	7.6	8.5	6.6	7.6	1.5	0.6	62.8097
A8TX70	-0.410019	26.46	0.126	-1.18594	2615	18	4.65	0	31.7782	5.3	1.4	6.3	5.9	5	9.3	2.2	6.2	6.8	8.5	2.1	5	4.1	5.5	4.7	7.2	5.2	6.1	0.5	2.7	80.2906
A9QM74	-0.0263566	17.25	0.156	-0.276158	516	3	-1.2	0	0	8.3	2.1	4.3	7	2.1	4.8	1.7	6.6	5.4	13.8	1.7	4.8	5	6	4.3	6.4	5.6	7.4	1.2	1.4	109.05
A9YTQ3	-0.459914	48.79	0.028	1.10784	701	7	2.13	1	10.9843	8.7	3.3	4.9	4.4	3	8	3.1	1.9	3.9	10	2.6	1	11	5.4	8.1	8.4	5	5	0.9	1.6	69.3581
B0FP48	0.0353612	22.81	0.6735	-1.05436	263	1	0.41	0	0	8.4	1.5	3.4	2.7	2.7	6.8	2.3	4.2	1.1	14.1	0.8	4.2	7.2	6.1	5.7	9.1	8.7	7.2	1.1	2.7	100.494
B0I1T2	-0.401768	2.16	198	-0.013218	1018	31	0.61	0	9.43026	8	1.8	5.2	6.8	4.1	6.1	3.8	4	4.1	10.7	1.8	3.3	4.5	4.8	9.4	5.1	4.5	7.4	1.2	3.3	86.7878
B0YJ81	0.258681	23.61	1.03	-3.0714	288	9	0.23	0	0	9	0.7	2.8	4.9	5.9	6.9	2.4	6.9	3.8	10.8	3.1	1.7	4.9	2.1	5.6	6.6	7.3	7.3	2.1	5.2	99.2361
B1AJZ9	-0.882649	72.52	0.051	3.58939	1412	8	1.31	0	31.8697	6.6	1.1	4.5	12.6	1.6	3.2	2.1	4.3	10.7	10.8	2.5	3.7	3.3	8.6	5.8	7.9	3.9	5.4	0.4	1.3	81.0269
B1AK53	-0.591452	44.5	5.94	1.99398	854	9	2.76	0	22.4824	10.5	1.9	4.7	6.8	1.4	7.8	3.6	1.6	4.3	10.5	1.9	2.2	11.9	4.9	6.2	8.1	4.4	4.4	0.9	1.6	70.9368
B1AKI9	-0.749569	28.02	0.236	1.29652	464	4	3.64	0	0	7.3	3.2	8	6.5	3.4	5.6	2.4	3	5	8.2	1.3	4.7	6.7	4.1	6	9.3	6.7	3.2	2.4	3	60.4095
B1AL46	-0.496697	63.44	0.077	1.33958	878	0	2.09	0	13.6674	8.3	2.5	2.7	6.8	2.6	8.8	2.1	0.9	4.6	10.4	1.8	1.5	13.7	6.5	5.4	8.8	4.9	5.5	1.5	0.9	68.1435
B1AL88	-0.613755	30.57	0.045	0.355048	458	0	3.97	0	12.8821	6.6	4.8	4.1	7.4	3.5	6.8	2	2	4.8	10	0.9	4.1	4.4	8.1	5.9	9.4	5.7	4.4	2.2	3.1	66.048
B1ANS9	-0.320259	14.34	0.018	-0.596228	1081	10	1.12	0	6.84551	4.2	2	6.3	5.9	5	5.4	3	6.8	7.5	9.6	2.2	4.1	4.4	4.6	5.6	7.7	4.6	7.1	1.4	2.6	89.0379
B1APH4	-0.883705	18.3	0.011	1.6569	448	1	0.22	1	6.47321	3.3	3.6	4.7	8.3	3.6	6.2	3.8	3.3	6.7	8	1.8	6.5	4.2	5.8	6.9	7.1	6.5	4.9	0.9	3.8	61.9866
B1ATL7	-0.371812	19.8	0.186	1.09387	298	1	2.08	0	16.1074	6.7	2.3	2.7	4.7	3.4	9.1	5	3.7	2	8.1	2	4.7	16.1	3	5.4	9.1	3.4	6.4	1.7	0.7	71.0067
B2CW77	-0.847191	14.61	0.026	2.06616	178	3	0.81	1	13.4831	6.7	3.4	2.8	3.9	2.2	10.1	2.2	0.6	6.7	8.4	0.6	2.8	10.7	1.1	13.5	8.4	5.1	5.1	4.5	1.1	56.4607
B2RC85	-0.666667	21.72	0.169	0.691697	870	18	2.73	0	4.5977	4.6	1.5	5.1	8.6	5.1	6.8	3.2	4.8	7.9	7.7	3.2	5.2	3.4	3.1	5.6	8.3	4.9	4.6	1.7	4.6	66.7931
B2RD01	-0.515508	9.09	0.003	1.75712	187	4	-1.15	1	0	10.2	1.1	4.3	10.2	2.7	3.2	2.7	5.3	7	10.2	3.2	1.6	4.3	5.3	7	9.6	6.4	3.7	1.1	1.1	81.4973
B2RN74	0.770552	5.83	0.04	-6.07401	326	0	-0.62	0	9.20245	4.9	4.6	1.5	2.5	9.2	6.1	1.8	7.4	3.1	13.8	4	4	4.9	2.8	1.8	8.6	6.4	7.1	1.8	3.7	107.914
B2RNN3	-0.588889	50.45	0.66	0.923187	333	1	3.57	0	20.1201	3.9	1.2	6	5.1	3.6	20.1	2.1	4.8	7.5	6.6	1.2	3.3	8.1	3.3	4.2	5.1	5.7	5.1	1.2	1.8	63.2132
B2RTY4	-0.62398	47.57	0.866	0.973577	2548	63	1.6	0	8.20251	5.4	1.6	5	8.1	4	4.1	2.5	5.2	8.2	10.2	2	4.6	4.2	5.3	6.8	9	4.9	5	0.8	2.9	80.1766
B2RU33	-0.773063	35.42	0.098	1.89724	542	3	5.22	0	8.85609	5.2	3.9	6.8	8.3	1.8	6.1	3.7	3.1	8.9	9.8	3.5	6.1	3.1	5	5	8.5	3.5	5	1.1	1.7	69.9815
B2RUY7	-0.324324	7.21	0.021	0.493389	222	2	1.63	0	12.1622	5	12.2	5.9	9	3.2	6.8	4.5	5.4	6.8	4.1	0.5	5.4	8.6	2.7	1.8	4.1	2.3	8.1	1.4	2.7	65.3604
B2RV13	-1.05	4.88	0.555	1.87707	164	1	-0.3	0	9.14634	4.3	1.2	4.3	5.5	1.8	2.4	4.3	6.7	9.8	7.9	1.2	9.1	3.7	5.5	9.8	6.1	5.5	4.9	1.2	4.9	75.4878
B2RXF0	-0.0273684	23.68	0.02	-2.45587	380	0	1.38	0	11.0526	9.2	1.8	2.6	2.4	6.6	11.1	2.6	2.1	1.1	12.4	2.1	1.6	6.8	6.1	8.7	6.6	3.4	5.8	2.4	4.7	82.4474
B2RXF5	-0.43981	41.23	0.595	0.877667	422	2	0.73	1	15.6398	7.3	4.7	4.7	5.7	3.3	7.3	4	0.7	4.3	11.8	0.7	0.7	10.9	4	8.8	8.1	3.6	6.4	0.7	2.1	74.8815
B2RXH2	-0.510277	34.78	0.01	0.488998	506	4	3.12	0	0	6.5	2.4	3.4	6.1	4	8.9	4	3.6	4	8.1	3	3.6	6.3	5.9	5.9	6.9	6.9	4.7	2	4	65.751
B2RXH4	-0.611517	63.48	0.021	2.45109	712	5	2.11	0	32.3034	5.1	2.5	4.4	10.5	1.5	6	1.8	2.8	4.5	11	1.1	2.7	10.4	4.5	5.6	11.4	6.2	5.6	1.3	1.1	75.0281
B2RXH8	-0.954608	58.7	93.6	3.1324	293	6	2.68	1	10.2389	7.8	0.3	8.5	8.9	2.7	8.2	1.4	3.8	10.2	4.8	2.4	6.5	3.4	4.8	4.4	10.6	2	6.8	0	2.4	60.9215
B3KS81	-1.89343	100	0.05	7.04881	715	32	2.82	0	45.035	3.9	0.6	3.4	3.6	0.1	4.3	3.2	0.8	7.8	1.5	1.1	2.8	8.5	4.3	18.6	26.4	5.6	1.5	0.6	1.1	17.6503
B3SHH9	0.665471	16.14	0.019	-2.36078	223	2	0.61	0	19.2825	11.7	1.3	2.7	4.5	5.8	8.5	1.3	5.8	0.4	19.3	2.7	1.3	3.1	3.6	5.8	8.1	5.8	4.5	1.8	1.8	122.601
B4DS77	-0.639858	74.06	0.145	0.578255	424	2	3.49	0	0	7.3	3.1	5.2	4.2	3.3	7.8	3.8	2.1	5.4	8.5	2.4	5.7	8.7	4.7	6.4	5.7	6.8	5.2	0.9	2.8	63.75
B4DU55	-0.711723	6.22	0.17	0.967969	563	16	0.02	1	22.0249	3.6	5	1.4	6.9	4.6	6.9	6.4	5.7	10.7	6.6	1.4	3.6	3	5.3	6	9.9	5	4.1	0.7	3.2	63.1972
B4DX44	-0.859953	0.94	0.053	1.43014	427	4	0.29	1	27.8689	3.7	8	4	8.4	5.6	5.6	6.6	3.7	13.3	6.3	0.9	3.3	2.8	2.3	5.6	6.6	5.9	2.8	1.2	3.3	51.171
B4DXR9	-0.905983	1.54	0.362	1.31168	585	3	-0.13	1	25.4701	3.8	6	1.7	10.1	5.1	6.8	6.2	5.1	13.3	5.3	0.3	4.3	3.1	2.9	4.6	6.3	7	2.9	1	4.1	52.8547
B5MCN3	-0.310076	1.51	0.046	0.331809	397	5	0.13	0	0	4.3	1.8	4.8	7.8	4.8	7.3	1.5	4.3	6.3	12.8	2.5	3.3	4.8	5.8	6	7.3	3	6.5	1.5	3.5	90.0756
B5MCY1	-0.17999	25.28	0.038	-2.88954	1934	0	0.51	0	30.2999	4.4	2.6	4.8	7.1	5.1	3.8	1.7	7.3	8.2	10.9	1.7	5.6	4.5	4.4	3.4	8.6	3.4	7	1.3	4.1	95.6205
B5MD39	-0.0822222	4.44	2.65	0.007125	225	0	0.49	0	0	11.6	0.9	4	4.4	4.4	8	3.1	5.8	2.7	5.8	1.8	4	6.2	4.4	3.6	7.6	9.8	7.6	1.3	3.1	78.5333
B5ME19	-0.796389	28.45	28.5	2.66184	914	41	0.26	0	19.5842	6.1	1.3	6.9	11.3	2.6	5	2.7	5	8.3	9.5	3.1	4	2.8	4.9	6.5	6.5	4.6	4.6	0.8	3.4	76.2035
B7U540	-0.0988453	22.86	0.018	-1.02153	433	3	-0.48	0	0	8.1	2.3	6	7.2	5.8	6.9	3	6.5	3.7	9	3.2	3.2	3.2	3.5	7.2	6	4.4	7.2	1.2	2.5	89.1917
B7Z1M9	-0.402266	57.22	0.042	1.95873	353	3	2.42	0	27.1955	9.6	2.5	3.7	3.7	3.4	10.8	2.5	1.1	1.7	12.7	0.3	0.8	14.7	2	12.5	9.1	3.1	4.2	0.8	0.6	76.0907
B7Z6K7	-0.939883	15.09	0.219	1.53992	855	17	2.12	1	25.3801	3.4	6.8	1.3	8.8	4.7	9	9	2	9.6	5.1	0.6	2.6	2.8	4.7	6.1	10.9	4.1	4.6	0.6	3.5	44.4444
B7ZAQ6	0.556264	7.47	1.4	-6.68129	455	0	-0.92	0	24.6154	3.7	1.1	2.6	4	9.7	5.1	1.5	10.3	4.8	12.3	4.6	2.6	2.2	3.7	4.4	8.6	5.5	7	1.8	4.4	112.418
B7ZBB8	-0.418994	46.09	0.159	1.83706	358	5	1.52	0	25.6983	14.2	3.6	3.9	9.8	3.4	8.7	0.8	0.6	2.5	10.1	0.6	0.8	11.5	6.7	7.3	6.4	2	5.3	0.6	1.4	71.0335
B8ZZ34	-0.538035	73.8	0.033	1.72933	397	0	4.94	0	41.3098	14.9	3	3.5	2.5	2.3	10.6	1.5	0.3	2	8.8	1	1.8	14.9	3.8	11.6	5.3	4.8	3.5	1	3	60.4534
B9A064	-0.403738	16.82	2525	0.800391	214	3	0.52	0	0	7	2.8	2.3	5.1	1.9	8.4	1.4	0.5	5.1	9.8	1.4	1.9	10.7	5.1	5.1	11.2	7.5	7.5	2.8	2.3	68.785
B9A6J9	-0.665574	33.88	0.074	1.44117	549	0	3.02	0	0	6.7	2.4	5.5	6	3.1	7.7	2.7	3.8	5.6	8.7	2.2	1.8	8.6	5.8	8.6	6.9	4.2	4.6	2.7	2.4	68.9617
B9EJG8	0.502008	15.66	0.008	-3.81595	249	2	0.59	0	0	8	2.8	2.8	4.8	7.2	5.6	1.6	6.4	3.6	12	3.2	4	3.6	3.6	3.2	7.6	4.8	9.2	2	3.6	106.867
B9ZVM9	-1.0796	50.71	0.077	3.64906	353	1	0.3	0	0	10.8	0.6	4	9.9	1.4	7.6	2.8	1.7	5.7	7.1	2.5	2.3	9.6	7.4	8.2	11	4	2.3	0.8	0.3	51.5864
C4AMC7	-0.560907	45.57	2.475	2.57415	463	0	1.26	0	11.4471	8.2	0.2	5.4	7.8	2.4	8	1.3	4.3	6	8.9	1.7	1.3	11.4	7.6	5	8.4	3.7	6.3	0.2	1.9	77.7538
C9J069	-0.621414	67.62	0.123	2.28655	976	24	3.64	0	38.0123	11.9	2.4	4.5	6.4	3.2	7.6	2	1.6	1.1	7.9	1.1	1.2	14	1.8	12.1	7.3	5.4	4	0.9	3.5	60.6352
C9J2P7	-0.546226	39.43	0.01	0.261447	530	0	0.12	0	5.4717	7.7	3.2	4.7	5.8	2.5	5.3	5.5	2.6	6	10.6	2.3	3.4	4.7	6.8	5.3	7.9	5.8	5.5	1.1	3.2	75.1132
C9J442	-0.283951	4.94	0.075	-0.273289	243	5	0.1	0	5.76132	4.1	5.8	1.6	4.5	3.3	4.5	3.7	1.6	2.1	12.8	2.1	2.9	9.1	8.6	7.4	9.9	5.8	6.6	3.3	0.4	79.3827
C9J798	-0.35467	12.45	0.315	0.52111	803	15	0.35	0	0	6.8	2.2	5	7.7	3.7	5.9	2.9	3.1	5.9	12.1	1.4	2.5	5.4	4.6	7.1	7.5	5.4	7.5	1.6	1.9	87.7709
C9JDV5	-0.209655	2.76	0.002	0.46397	145	2	0.32	0	0	6.9	2.1	3.4	2.8	4.1	3.4	2.8	7.6	5.5	9	3.4	5.5	8.3	2.8	5.5	9.7	10.3	3.4	1.4	2.1	81.4483
C9JE40	-0.389687	43.28	0.162	0.522503	543	2	0.58	1	22.6519	6.6	1.5	4.4	9.4	3.1	4.2	3.1	2.9	4.2	14.5	1.8	2.2	8.5	8.1	4.2	7.2	4.2	5.5	1.7	2.4	90.884
C9JG80	-0.789543	88.93	0.053	2.97134	1138	0	2.35	0	29.9649	6.1	1.5	5.5	4.1	1.7	2.9	4.1	4.2	5.5	10.4	1.6	2.8	16.8	4.3	9.1	9.4	5.2	3.6	0.6	0.6	73.4007
C9JH25	0.062069	65.52	0.009	-0.355193	899	7	3.11	0	52.614	12.1	2.4	2.9	4.7	3.2	11.5	1.1	1	0.8	16.7	0.6	0.8	12.3	2.3	6.3	10.8	4.4	2.9	1.9	1.2	89.4883
C9JI98	0.160795	43.75	1.81	0.327015	176	4	-1.28	0	22.7273	22.7	1.1	2.3	2.8	1.7	10.8	0	2.3	0.6	13.6	1.7	0.6	9.1	3.4	11.4	6.8	1.7	4	1.7	1.7	96.3068
C9JJ37	0.14055	3.09	0.004	0.059526	291	0	-0.14	0	27.1478	11.7	3.4	2.4	10.3	4.5	4.8	2.4	1	2.4	15.5	0.3	1.7	5.5	3.8	9.3	4.5	2.7	11.7	0.7	1.4	109.897
C9JJH3	-0.571132	39.06	0.01	0.467379	530	0	0.22	0	5.09434	7.5	3.2	4.7	5.8	2.5	5.1	5.1	2.8	5.7	10	2.3	3.4	5.3	7.2	6	7.5	5.7	5.8	1.1	3.2	74.5472
C9JLJ4	-0.545283	39.25	0.012	0.288516	530	0	0.04	0	5.09434	7.9	3.2	4.3	6.2	2.5	5.3	5.1	2.6	5.8	10.6	2.3	3.4	4.9	7.2	5.5	7.7	5.7	5.5	1.1	3.2	75.3019
C9JN71	-1.02392	9.04	0.065	2.10823	531	18	-0.35	1	24.1055	4.1	5.6	1.5	8.7	4.9	6.4	6.8	3.2	11.7	4.5	0.9	2.4	4	4.3	7.3	9.4	5.8	3.6	0.4	4.3	44.6328
C9JPN9	-0.534906	39.62	0.011	0.286532	530	1	0.22	0	5.28302	7.9	3.2	4.3	6	2.5	5.3	5.3	2.6	6	10.6	2.5	3.4	5.1	7	5.3	7.5	5.7	5.5	1.1	3.2	75.3019
C9JQI7	-0.343836	16.29	0.002	-1.03699	657	4	-0.16	0	9.43683	5.3	2.3	4.3	8.1	4.7	3.3	3.5	6.1	9.4	11.7	1.8	4.6	3.8	4.3	3.7	7.6	3.7	5.6	1.8	4.4	91.1111
C9JR72	0.0825328	2.84	0.173	-0.217374	458	3	2.29	0	14.4105	14.4	3.1	5	5.7	5	8.7	2	1.3	0.9	12.4	0.9	1.5	6.1	3.3	7.6	4.4	5.9	7.2	1.7	2.8	88.952
C9JRZ8	-0.356329	0.32	4.84	0.49987	316	8	-1.02	0	0	6.6	0.9	6	8.5	6.6	4.4	3.2	6	9.8	8.5	2.2	3.2	5.4	3.5	3.5	4.4	5.1	7	1.9	3.2	83.6076
C9JSJ3	-0.80768	69.91	0.002	2.40636	638	10	2.05	1	21.6301	6.7	2.5	5	6.1	2	6	2.4	2.2	8.3	10.2	1.3	2.5	9.6	6.1	5.5	12.1	5.5	3	1.6	1.6	63.6677
C9JTQ0	-0.305	26.58	0.014	2.06018	380	12	1.33	0	39.2105	16.1	1.3	3.2	5.8	1.8	11.6	2.1	1.1	1.1	11.8	1.6	2.1	8.9	3.4	11.6	7.1	3.4	5	1.1	0	80.8421
C9JVI0	-0.545472	39.25	0.012	0.277221	530	0	0.16	0	5.4717	7.9	3.2	4.5	5.8	2.5	5.3	5.5	2.6	5.8	10.4	2.3	3.4	4.9	7	5.3	7.7	6	5.5	1.1	3.2	74.566
C9JVW0	-0.241549	69.01	0.028	0.737739	142	0	1.06	0	17.6056	13.4	3.5	1.4	3.5	0.7	12	0	0.7	0	9.9	0.7	0	17.6	2.8	12	8.5	2.8	6.3	1.4	2.8	72.9577
D6R901	-0.53434	39.62	0.012	0.286785	530	0	0.26	0	5.28302	7.9	3.2	4.3	6	2.5	5.3	5.3	2.6	5.8	10.6	2.5	3.6	5.1	7	5.3	7.7	5.5	5.5	1.1	3.2	75.3019
D6R9N7	-0.551509	39.25	0.012	0.328124	530	0	0.21	0	5.4717	7.9	3.2	4.5	5.8	2.5	5.3	5.5	2.6	6	10.4	2.3	3.4	4.9	7	5.3	7.7	5.8	5.5	1.1	3.2	74.566
D6RA61	-0.551509	39.43	0.011	0.282399	530	0	0.05	0	5.4717	7.9	3.2	4.5	5.8	2.5	5.3	5.5	2.6	6	10.4	2.3	3.2	4.9	7.2	5.3	7.7	5.8	5.5	1.1	3.2	74.566
D6RBM5	-0.408743	29.51	0.007	1.09044	183	0	-0.99	0	0	10.4	4.4	4.4	5.5	3.3	5.5	5.5	1.6	3.8	10.9	3.8	3.3	6.6	6	6	7.1	5.5	3.8	0.5	2.2	70.4918
D6RBQ6	-0.546038	39.43	0.012	0.268567	530	0	0.02	0	5.4717	8.1	3.2	4.5	5.8	2.5	5.3	5.5	2.6	5.8	10.4	2.3	3.4	4.9	7.2	5.3	7.7	5.7	5.5	1.1	3.2	74.7547
D6RCP7	-0.546226	39.43	0.011	0.283903	530	0	0.09	0	5.4717	7.9	3.2	4.3	6	2.5	5.3	5.5	2.6	6	10.4	2.3	3.2	4.9	7	5.3	7.7	6	5.5	1.1	3.2	74.566
D6REC4	-0.961656	33.99	0.001	3.51017	459	1	2.13	0	36.3834	12	0.9	2.6	10.5	1.3	7.6	0.9	2.6	6.1	10	1.7	1.3	4.1	10.5	13.9	4.6	2.6	4.1	1.7	0.9	73.268
D6RF30	-1.06557	76.44	0.052	3.20107	607	3	3.8	0	30.1483	8.9	1.3	3.5	11.7	1.3	5.3	4	2	9.2	10.4	2	3.5	5.3	9.2	6.9	7.1	2.8	3.8	1	1	68.0725
D6RGH6	-0.497403	42.34	0.003	2.18599	385	4	2.1	0	0	10.1	2.9	7.3	5.7	3.9	6.5	1.8	2.9	3.6	10.9	1.3	3.1	9.6	4.4	7.5	9.1	4.9	3.1	0.5	0.8	72.8571
D6RJB6	-0.54717	39.25	0.012	0.27939	530	0	0.13	0	5.4717	7.9	3.2	4.5	5.8	2.5	5.3	5.5	2.6	5.8	10.4	2.3	3.4	5.1	7	5.3	7.7	5.8	5.5	1.1	3.2	74.566
E2RYF6	-0.33057	97.41	0.001	-0.452012	1773	42	2.58	0	79.8646	9	0.2	1.2	9.4	1.4	9.4	1	2.9	0.9	2	2	1.2	1.3	0.2	0.6	18.5	33.6	4.5	0.2	0.6	40.9701
E5RG02	0.0597701	16.67	0.042	-0.986941	174	0	-0.6	0	0	3.4	4	3.4	1.7	2.9	8	2.9	5.7	5.7	11.5	2.9	2.3	6.3	5.7	4	10.9	4.6	8	4	1.7	94.023
E5RHQ5	-0.749871	88.98	0.136	2.5959	1161	2	1.51	0	29.6296	5.9	1.5	5.3	3.7	1.9	3	4.6	4.7	5.3	10.4	1.7	2.8	16.6	4.7	8.4	9.6	5.3	3.1	0.7	0.6	74.0568
E5RIL1	0.0353612	22.81	0.742	-1.05436	263	0	0.41	0	0	8.4	1.5	3.4	2.7	2.7	6.8	2.3	4.2	1.1	14.1	0.8	4.2	7.2	6.1	5.7	9.1	8.7	7.2	1.1	2.7	100.494
E5RJM6	-0.146867	5.26	0.004	1.67367	399	0	-1.22	0	46.8672	18	0.5	4	8	0.3	13.5	4.8	0.8	0.5	15.3	0.8	0	4.8	3.8	9.3	3.3	4.8	5.5	2.3	0	96.5915
E7ERA6	-0.172691	33.73	0.006	0.476445	249	7	1.87	0	21.6867	11.2	6.4	2	4	2.4	6.4	1.2	1.2	2	10	2	1.2	15.3	3.2	9.6	8.4	5.2	5.6	2	0.4	71.4056
E7ETH6	-0.749254	12.94	0.285	1.13505	402	3	1.25	0	11.9403	3.7	5.5	2.5	8.5	4.5	8.5	6.5	2.2	8.2	7	1	2.5	3.7	5.7	5.5	10.7	3.7	5.7	1	3.5	56.2189
E7EU14	-0.429825	0	0.805	0.453722	171	2	-1.7	0	0	7.6	2.9	5.3	5.3	2.3	5.3	4.1	4.1	10.5	9.4	4.1	1.2	4.7	4.7	5.3	5.8	5.3	6.4	3.5	2.3	78.7135
E7EW31	-0.669557	99.41	2.61	2.87808	1015	22	4.67	0	38.7192	10.9	0.8	2.9	6.3	2.4	8.8	0.7	1.8	2	6.9	0.6	1.3	18.7	4.8	9.1	10	4.6	5	1.2	1.4	59.3202
E9PAV3	-0.334745	99.28	314	1.79084	2078	32	4.16	0	64.7257	12.5	0.6	1.8	3.5	1.2	6.4	0.6	2.5	7.2	6.5	0.9	1.7	21.7	2.6	0.8	12.5	11	5.7	0	0.5	64.3551
E9PB15	-0.63253	23.49	0.017	1.78784	166	3	-1.09	0	11.4458	9	3	11.4	7.2	3.6	3.6	4.2	3	4.8	6.6	3	4.2	6	1.2	6	7.2	2.4	6.6	3.6	3	65.8434
E9PGG2	-0.510818	45.65	0.012	1.74211	379	5	-0.19	1	8.70712	9	2.1	4.7	7.4	3.4	6.1	1.6	0.8	2.4	12.4	1.3	2.9	10.3	8.7	7.1	7.7	4.2	5.8	1.3	0.8	77.2559
E9PIF3	-0.634146	15.72	0.017	1.13054	369	0	1.19	0	0	5.4	3.3	4.3	5.7	2.4	3.3	3.8	4.6	7.9	10.6	2.4	3.5	8.9	4.3	8.1	7	6.8	4.3	0.8	2.4	77.1816
E9PJ23	-0.821412	31.29	0.145	1.54008	425	0	1.37	0	29.8824	4	2.8	4.2	4.7	2.4	3.1	3.3	4.7	9.4	8.9	1.4	3.5	10.1	5.4	10.4	6.8	5.9	6.1	1.4	1.4	74.9647
E9PJI5	-0.628997	11.38	0.02	0.871983	369	0	1.61	0	0	5.7	3.5	4.6	6.2	2.4	3.5	3.5	4.3	6.5	10.3	2.4	3.8	9.5	3.3	8.1	7.3	6.8	3.8	1.6	2.7	73.7669
E9PKD4	-0.636571	10.29	0.012	0.88641	350	0	1.42	0	0	5.7	3.4	4.3	6	2.6	4	3.7	4.6	7.1	10	2.6	3.7	8.6	3.4	8.3	7.4	6.6	3.7	1.7	2.6	73.3143
E9PQR5	-0.715046	27.08	0.051	1.00413	432	0	1.35	0	20.1389	4.2	3.2	4.4	4.4	2.5	3.2	3.2	4.6	9	10	1.4	3.7	10.9	5.1	9.3	6.7	5.6	5.8	1.4	1.4	77.8241
F2Z333	0.20708	21.68	0.017	-0.142823	226	0	0.93	0	29.2035	15.9	5.8	2.2	4.4	2.2	6.6	1.3	1.8	0.4	12.8	2.2	1.3	13.3	1.8	10.2	3.5	3.1	7.1	1.8	2.2	93.4071
F5GYI3	-0.352756	53.81	0.003	1.89931	381	0	2.25	0	12.336	10.8	1.8	3.4	8.4	2.6	8.9	2.6	1.8	1.8	12.9	1.3	0.8	12.3	5.2	6.8	9.4	2.6	4.2	0.8	1.3	80.2625
F5H284	-0.425	0.61	84.9	1.0102	164	0	0.55	0	0	6.1	2.4	4.9	5.5	8.5	11.6	2.4	7.9	9.8	3.7	1.8	5.5	3	1.8	5.5	6.1	6.7	4.3	0.6	1.8	63.6585
F5H4A9	-0.0623482	49.8	0.066	0.752432	247	2	2.3	0	14.9798	9.3	3.2	4.9	5.7	2	15	0.8	2	1.2	13.8	1.2	0.8	11.3	2.8	8.1	6.5	1.6	6.5	0.8	2.4	89.6761
F5H4B4	-0.815263	28.95	0.175	1.40117	570	8	0.8	0	9.64912	5.1	2.6	3.9	7.9	4.7	2.6	3.2	3.3	9.6	8.8	2.3	5.8	5.4	4	6.7	10.5	5.1	4	1.4	3	64
F8VTS6	-0.185366	4.88	0.329	-0.112143	287	0	0.36	0	0	4.5	4.9	5.6	6.3	4.9	5.9	2.1	5.6	6.3	8.4	2.1	3.1	4.9	4.5	5.9	9.1	4.2	8.7	1.4	1.7	84.1463
F8W1W9	-0.823776	25.64	0.053	1.75858	429	0	1.29	0	22.1445	4.4	2.6	4.2	4.9	2.3	4.2	2.8	4.4	8.4	9.1	1.6	4.2	11.4	4.2	10.7	6.8	5.6	5.4	1.6	1.2	72.704
F8WBI6	-1.01867	72.78	0.298	3.20317	632	0	4.02	0	22.7848	8.9	1.6	3.3	13.3	1.3	5.5	4	2.4	7.8	11.1	1.6	3.6	4.7	9.5	6.3	6.8	3.2	3.3	0.9	0.9	70.9494
F8WCM5	-0.3345	34.5	8.04	0.838108	200	0	0.36	0	0	12	2.5	2.5	6.5	2.5	7.5	1.5	1	0.5	11.5	1	1.5	11	7.5	7.5	9.5	5	5	2.5	1.5	75.25
F8WFD2	-0.62	8.86	0.016	0.833129	350	0	1.29	0	0	5.7	3.7	4.3	5.7	2.6	4	3.7	4.6	7.4	10	2.6	3.7	8.9	3.4	8	7.1	6.6	3.7	1.7	2.6	73.3143
G3V0H7	0.30875	16.72	0.076	-4.90745	640	2	0.76	0	14.2188	4.5	3	2.8	4.2	6.2	7.7	1.9	8	5.3	11.1	3	5	3.8	2.2	3.6	9.7	4.8	8	1.1	4.2	101.984
H0Y354	0.169799	10.07	0.006	-0.250282	149	0	-1.09	0	9.39597	4	9.4	6.7	4.7	4.7	3.4	2	8.1	6	9.4	2	6	2.7	1.3	4.7	8.7	5.4	8.1	0.7	2	95.4362
H0Y7S4	-0.00575916	1.83	0.013	-0.713096	382	0	0.11	0	22.7749	3.1	5.5	5.2	4.7	3.7	3.1	2.4	4.7	6.5	17.3	2.9	4.5	3.9	5	5.8	6	5.2	6	1.8	2.6	106.361
H0YKK7	-1.29436	71.27	0.048	4.81224	550	0	2.65	0	44	6.4	2.5	1.3	23.1	0.5	5.3	1.6	1.5	4.2	12.9	0.9	2.5	4.2	9.8	11.1	4.9	2.7	2.5	1.1	0.9	69.7636
H0YM25	-2.06864	82.35	0.044	7.79069	810	0	-2.02	0	74.8148	2.7	0.4	1.4	30.1	0.1	1.2	1.9	5.4	13.3	4.2	5.4	1.1	0.6	14.2	9	2.1	2.1	1.5	2.7	0.5	44.5679
H3BQB6	-0.957246	59.06	0.467	3.34988	276	2	3.48	0	0	5.8	1.1	6.5	10.5	2.2	5.8	1.1	4.3	9.8	7.2	2.2	4	5.4	4	8.3	10.1	4.3	5.8	0.4	1.1	67.8261
H3BS89	-0.072449	13.27	0.017	-1.62677	294	1	1.01	0	0	7.8	4.8	3.7	3.1	4.4	8.8	2.4	6.1	2.7	11.2	3.4	4.8	4.1	2	9.5	5.4	5.4	3.1	2.7	4.4	84.3537
H3BSY2	-1.06155	76.11	0.085	3.22376	632	0	3.73	0	31.0127	8.5	1.3	3.3	12.2	1.4	5.7	3.5	1.9	8.7	10.4	1.9	3.8	5.2	10.1	6.2	7.1	2.8	3.8	0.9	1.1	67.6899
H3BV60	-0.192089	34.49	0.009	1.22111	316	5	2.11	0	46.8354	15.5	2.2	2.2	2.5	4.7	7.9	1.9	0.3	0.9	9.5	0.3	0.3	20.3	2.5	11.1	7.6	3.2	6.3	0.6	0	72.1203
H7BZ55	-0.824017	84.53	0.319	4.09765	1655	0	2.79	0	65.4381	13.4	1.2	3.3	13.9	0.3	4.8	1.8	1	3.4	14.9	1.1	0.9	1.9	12.5	10.8	6.4	4	3.7	0.7	0	85.8863
H7C241	0.38972	2.8	1.45	-2.56105	214	0	-0.6	0	9.34579	6.1	2.8	2.8	2.8	9.3	7	0.5	7.5	1.9	7.9	5.1	4.2	4.7	4.2	4.7	7.9	7	7	1.9	4.7	86.5421
I3L1E1	-0.688172	51.61	0.003	2.26177	186	0	3.21	0	17.7419	8.6	2.2	2.7	7	0.5	12.4	2.7	0.5	1.6	11.3	1.1	1.6	17.7	3.8	8.1	6.5	5.9	2.7	2.2	1.1	62.5269
I3L273	-0.681853	100	0.004	1.41225	518	5	2.54	0	27.027	6.9	0.6	4.4	6.9	3.5	4.6	2.9	2.3	4.4	9.7	1.4	3.9	17.8	2.9	4.4	8.7	9.3	3.5	0.4	1.5	63.7066
I6L899	-1.0065	74.64	0.152	3.10241	631	3	3.73	0	22.504	8.7	1.6	3.3	13	1.3	5.5	4	2.4	7.8	11.1	1.4	3.6	4.9	9.5	6.2	6.7	3.3	3.5	1.3	1	71.3629
M0QZC1	-0.378419	50.76	0.003	1.41856	329	2	1.68	0	28.5714	11.6	2.4	3.6	5.2	3	10	0.9	1.2	0.9	10.3	0.3	0.6	18.2	1.8	10.3	8.2	3.3	4.6	2.7	0.6	69.8176
O00115	-0.261389	5.28	8.58	-1.09963	360	5	1.14	1	0	8.3	2.5	3.9	2.8	4.7	9.2	2.2	2.2	4.4	10	1.4	4.4	7.8	6.9	3.1	8.9	3.9	5.8	3.3	4.2	72.9167
O00116	-0.334498	12.31	43.9	0.420447	658	19	0.18	0	0	8.1	2.1	5	6.8	4.4	9	2.6	5.9	5.9	7.9	1.8	4.1	4.4	3.5	5.8	6.2	5.9	5.9	1.2	3.3	79.1793
O00141	-0.319026	20.42	0.214	0.078069	431	12	0.17	0	0	6.5	1.2	4.4	6.3	5.8	4.9	3.5	5.3	7.9	11.1	2.3	5.8	7.2	3.2	3.9	6.7	4.2	5.3	0.7	3.7	86.2181
O00142	-0.476604	18.49	2.03	0.947357	265	7	0.03	0	0	4.9	2.3	3.8	9.1	2.6	4.9	3.8	4.2	4.5	10.6	3.4	3.4	6.4	2.6	9.8	6	4.2	7.5	3	3	84.1887
O00144	0.223858	18.1	0.006	-3.95267	591	0	1.6	0	15.736	11.5	4.2	2.4	4.7	4.9	8.8	2.4	3.4	3.2	11.2	3	1.9	6.8	2.5	5.6	5.2	5.9	6.8	2.4	3.2	87.8849
O00148	-0.297892	7.73	241	0.242908	427	20	0.7	1	0	5.2	2.1	7	8.4	5.9	4.2	2.3	5.4	6.6	9.4	3.5	3.3	4.2	6.1	6.1	5.4	3.5	9.1	0	2.3	89.1803
O00151	-0.521884	47.72	817	1.31107	329	29	1.24	0	0	7.3	2.4	3.6	7.9	3	6.7	3	4.3	6.7	7	1.8	5.8	7	4.6	4.3	7.9	6.7	7.3	0.6	2.1	72.31
O00154	-0.302895	14.74	141	0.729073	380	10	0.88	0	10.2632	7.9	3.2	3.7	7.4	2.1	7.4	2.6	4.7	5.8	6.8	2.9	3.7	5.3	4.2	7.4	6.8	5.3	10.3	0.5	2.1	82.8158
O00155	0.485596	15.51	0.037	-2.27021	361	4	-0.94	0	32.41	13.9	3.9	3.3	2.2	4.4	8.6	1.1	2.2	0.6	18.6	0.6	1.4	6.9	1.4	9.1	7.8	3.3	5.8	2.5	2.5	111.745
O00159	-0.386736	4.8	104	0.082007	1063	44	0.98	0	8.4666	7	1.4	4.1	7.2	4.4	5.5	2.4	4.8	6.2	11.2	0.9	4	4.2	4.7	8.5	6.3	5.3	7.2	1.3	3.3	90.3387
O00160	-0.548998	14.12	6.39	0.826469	1098	29	1.75	0	8.10565	5.6	1.2	5.1	7	4.8	8.4	1.7	4.9	6.2	8.4	2.4	4.4	5.2	5.5	8.1	5.9	4.1	6.6	1	3.6	76.694
O00161	-0.821801	22.27	154	2.31917	211	18	1.73	0	0	6.2	2.8	7.6	9	0.5	7.6	0.5	8.5	7.1	7.6	2.4	8.1	2.8	6.6	5.7	5.2	8.1	2.4	0.5	0.9	75.8768
O00165	-0.969534	35.84	15.5	2.77665	279	14	3.79	0	30.1075	2.2	0	10	8.6	8.6	10	3.2	2.5	1.8	5.7	1.8	1.4	11.5	3.2	9.3	9.7	4.3	3.6	1.8	0.7	44.6953
O00167	-0.424535	50.37	1.02	0.465187	538	3	6.02	0	5.20446	6.9	1.5	5.2	4.6	3.7	8.2	2.8	3.9	3.5	8.7	1.9	4.6	6.3	4.5	4.8	10.6	6.7	5.2	1.1	5.2	71.2639
O00170	-0.492121	2.73	99.2	1.15827	330	15	-0.07	0	0	9.4	2.4	7	8.5	2.7	5.5	3.6	5.5	7.3	9.7	2.4	2.4	4.5	6.7	5.8	3.3	2.7	6.1	1.2	3.3	86.0606
O00178	-0.307474	22.27	44.6	0.780891	669	34	1.31	1	0	6.9	1.6	5.1	6.1	3	9.4	2.2	4.5	6	9.1	3.1	3.1	5.7	3.7	6.1	8.5	6.3	7.5	0.4	1.5	81.5994
O00180	0.282738	22.92	0.971	-4.01638	336	6	-0.54	0	8.63095	5.7	2.7	3.9	6.2	8.6	6.5	3	4.8	4.2	12.5	1.2	2.4	2.4	4.2	4.2	8	4.5	9.8	1.5	3.9	101.458
O00182	-0.164507	0.85	22.7	-1.02328	355	2	2.26	0	7.60563	4.5	1.7	2.8	2.5	7.6	7.9	3.7	5.1	2	6.5	2.5	5.1	9.9	6.5	5.6	8.2	5.9	8.5	1.1	2.5	74.0563
O00186	-0.436486	7.6	27.2	0.346853	592	14	0.23	0	18.4122	5.7	2.7	7.1	7.4	3	3.5	1.9	7.3	11.1	9.3	2.5	4.4	4.2	3.4	3.9	6.4	5.2	6.1	1.2	3.5	87.9392
O00187	-0.282945	4.23	112	-0.504841	686	8	2.86	0	4.8105	6.4	3.9	5.7	6.1	4.5	9.2	2.9	4.5	4.5	8	1.3	2.6	6.6	2.6	4.1	7.6	7.4	5.4	1.7	4.8	70.9475
O00189	-0.131126	8.61	0.776	0.345678	453	7	1.42	0	27.1523	4	1.1	4.6	5.7	4.6	8.4	3.1	3.1	2.9	14.6	1.3	2	6.4	4.4	7.1	12.6	3.1	7.9	0.7	2.4	95.894
O00192	-0.555509	55.51	1.74	2.38688	962	33	3.72	0	19.2308	9.7	1.2	6.2	7.7	1.8	8.9	1.9	1.4	3.7	10.4	1.6	2.5	8	3.2	9.6	6.8	5.2	7.5	1.1	1.7	77.183
O00193	-1.45847	56.28	139	4.49086	183	22	0.58	0	13.6612	6	0.5	13.7	13.1	2.2	8.2	4.4	1.1	8.7	4.9	2.7	2.7	3.8	2.7	4.9	13.1	1.6	3.3	0.5	1.6	38.9617
O00194	-0.486697	14.22	110	1.09528	218	6	-0.17	0	0	6.4	1.8	7.3	6	5.5	7.8	0.5	4.1	6.9	9.2	2.8	6.4	3.7	5.5	5	4.1	6.9	5.5	0.9	3.7	74.2661
O00203	-0.382541	26.05	43.3	0.895934	1094	24	1.22	0	25.4113	6.5	0.9	5.7	8.1	2.8	4.6	1.6	6.2	8.5	10	2.4	4.7	4.5	4.2	3.8	10.7	5.4	6.9	0.5	2.1	89.4698
O00204	-0.544658	27.12	1.78	1.27211	365	10	1.32	0	10.411	4.4	1.1	6.6	7.1	5.2	7.1	1.9	5.8	5.2	7.7	2.5	2.2	10.4	3.8	5.5	9.3	4.4	4.1	2.5	3.3	68.6575
O00206	0.0327771	5.96	0.267	-2.50813	839	9	-0.56	0	28.9631	3.7	2.5	3.9	6	6.9	4.6	2.7	5.2	4.4	15.5	1.9	6.6	3.1	5	3.7	9.7	4.6	6	1.2	2.7	101.859
O00212	-0.110952	16.67	0.36	-0.089269	210	2	-0.09	0	11.9048	8.1	3.3	5.7	4.8	5.2	7.1	2.9	2.4	4.8	8.1	1.9	4.3	5.2	2.9	6.7	5.2	4.8	11.9	1.4	3.3	83.4762
O00213	-0.512958	60.99	0.849	1.67366	710	10	4.51	0	0	9.7	1.8	4.2	9.6	2.7	7.6	2.8	2.3	3.5	9.9	1.8	3.7	8.3	4.8	5.1	9.3	4.4	5.2	2.1	1.3	72.0704
O00217	-0.392381	15.24	71.3	1.15939	210	4	-0.47	0	0	11.4	4.3	4.3	9	3.3	5.7	1.4	4.8	3.8	9	3.3	3.3	6.2	2.4	8.6	4.3	6.7	2.4	1	4.8	72.1905
O00219	0.192767	7.41	0.133	-4.06162	553	5	-0.29	0	5.42495	7.4	2.5	3.6	4.5	6	7.6	2	5.4	3.8	12.5	2.7	2.2	2.4	4.3	6	6.9	5.1	7.2	2.5	5.4	98.2098
O00220	-0.247863	39.74	0.453	-0.024706	468	7	2.42	0	4.48718	9.6	4.5	4.5	6.2	2.6	9.4	2.6	3	3.6	8.8	2.4	3.8	7.1	3.2	6.6	7.3	5.8	7.1	1.5	0.6	75.8974
O00221	-0.4336	48.6	299	1.71806	500	10	3.09	0	21.8	11	2.4	5.2	6	0.4	10.8	3	1.8	2.2	13.8	1	1.8	8.8	5.6	7.8	7.6	4.8	3.8	1	1.2	82.86
O00222	-0.0490088	11.01	0.281	-3.7854	908	5	1.12	0	8.59031	6.8	3.1	4.1	5.6	4.6	6.4	2.2	8.6	5.6	7.8	2.3	3.6	4.7	3.6	5.2	7.6	6.3	6.6	1.4	3.7	89.989
O00231	-0.182227	1.18	757	1.28126	422	22	0.32	0	25.5924	11.1	1.2	5.9	8.3	2.6	3.1	1.7	5.9	8.3	14.5	1.9	2.4	2.4	5	5	7.3	4.5	5	0.5	3.6	105.047
O00232	-0.384211	3.07	178	1.08782	456	18	-0.21	0	9.42982	5.7	1.5	5.3	9.6	2	3.1	1.3	6.8	9.4	11.8	3.9	3.9	1.8	5	5.7	5.9	5.9	6.6	1.1	3.5	97.4781
O00233	-0.619731	15.7	61	1.90185	223	9	1.01	0	0	7.6	1.3	4.9	8.5	1.3	7.6	3.6	5.4	5.8	7.2	2.7	4.5	4	8.1	6.7	8.1	2.2	8.5	0.4	1.3	81.3004
O00237	-0.232993	21.75	21.967	-1.94199	685	2	1.22	0	3.35766	4.4	2.6	5	7.4	5.5	5	2.5	4.5	5.4	11.4	2.6	5	4.4	2.6	4.2	8.8	5	5.8	3.4	4.5	83.3723
O00238	-0.360159	11.35	0.099	-0.010727	502	5	1.8	0	0	4	3.8	5.4	6.8	2.8	6.4	3	6.2	6.4	10.2	2.6	3.2	5.2	3.4	6.2	8	6.2	5.6	1.4	3.6	83.8645
O00254	0.625668	19.79	0.361	-6.2957	374	2	-0.05	0	22.9947	8	3.7	1.9	2.4	8	4	2.9	8.3	3.5	13.9	1.9	5.3	4.8	1.1	2.4	5.6	8.3	5.6	1.6	6.7	110.856
O00255	-0.359837	25.69	2.86	0.586915	615	16	2.02	1	0	8.9	1.1	4.4	8	3.4	8.1	2	3.1	5	10.7	1.5	2.3	7.3	4.7	6.3	6.5	4.7	7	1.6	3.3	83.122
O00257	-0.884107	84.11	1.58	2.60115	560	26	1.97	0	25.7143	10	1.1	3.8	7.7	1.6	7.9	5.4	2.7	9.5	6.4	1.6	3	10.9	4.1	5.4	5.9	4.5	5.4	0.9	2.5	61.0536
O00258	0.368391	12.07	0.557	-2.06273	174	3	0.21	0	0	10.3	1.7	3.4	3.4	4.6	2.3	1.7	6.3	6.9	10.3	4.6	2.3	3.4	4	5.2	8	4	11.5	3.4	2.3	108.678
O00264	-0.56359	24.62	228	1.85991	195	13	-0.21	1	11.2821	7.7	1	11.3	8.7	5.1	8.2	1.5	2.6	6.2	11.8	1	1.5	6.7	2.6	5.6	5.6	4.6	4.6	0.5	3.1	77.0769
O00267	-0.738362	29.53	41.9	2.75445	1087	62	4.94	1	15.8234	4.6	0.6	6.9	9.4	2.9	8.9	2.1	4.4	5.7	6.2	2.4	3.2	7	4.9	5.6	7.9	5.5	7.3	0.8	3.7	66.9365
O00268	-0.295392	85.16	4.46	1.6864	1085	24	5.05	1	38.8018	16.5	0.5	2.2	3.8	1.5	8.4	1.3	2.6	4	8.1	1.3	2.5	14.5	7.8	4.7	6.6	7.1	6.2	0	0.6	76.1014
O00270	0.633542	6.58	0.329	-3.88035	319	0	2.5	0	17.8683	11.3	4.1	2.2	1.9	6.3	5.6	2.5	2.2	1.9	17.9	1.3	2.8	5.3	3.4	6.3	7.5	3.4	9.4	1.9	2.8	116.803
O00273	-0.451964	27.49	33.1	1.66222	331	16	-0.27	0	0	9.4	2.1	7.9	9.1	1.2	3.9	1.2	3.3	5.7	13.9	0.6	2.4	3.3	7.3	5.1	10	5.4	5.7	1.2	1.2	93.1722
O00287	-0.628676	59.19	1.27	2.60104	272	8	1.4	1	25	12.5	2.2	4.4	8.1	1.5	12.5	1.1	0.7	6.2	8.1	2.2	2.2	5.9	7.7	4.4	8.8	4.8	4.8	0.4	1.5	60.7721
O00291	-0.503279	26.42	4.6	1.06093	1037	15	0.29	0	10.4147	8.8	1.8	5.3	10.4	2.6	4.4	2.2	3.5	6.2	12	2.4	3.5	2.8	6.8	5.7	9.1	4.6	5.6	0.8	1.6	85.1688
O00292	-0.227596	16.12	0.671	0.24784	366	1	-0.32	0	0	8.7	2.5	3.6	6.3	3	6.8	2.5	1.6	2.5	13.4	2.2	1.6	7.7	6.8	9	7.1	3	7.9	2.7	1.1	90.3279
O00294	-1.04963	53.51	0.497	4.52879	542	5	3.38	0	19.5572	9	0.7	5.5	10.5	3	7	0.7	2.4	9.8	7.4	1.3	3.3	9.4	3	9.8	6.1	4.2	4.4	0.6	1.8	60.0185
O00295	-0.7325	55.96	0.268	1.82481	520	9	1.15	0	0	4.8	1.5	5.8	6.9	4	8.1	2.9	2.1	5	11.2	2.5	5.2	6.2	5.2	8.3	8.1	4.6	4.6	1	2.1	69.9423
O00299	-0.283817	1.66	665	1.00613	241	14	-0.32	0	0	8.3	2.5	5	9.5	5	5.4	1.2	2.9	7.5	12.4	0.8	5.4	5.8	3.3	3.7	4.1	6.2	7.1	0.4	3.3	88.6307
O00300	-0.483042	10.97	0.16	0.041435	401	4	0.87	0	15.9601	3.2	6.2	4.5	6	4.2	4.2	4.2	4.5	9.7	10	1.2	4.5	4.5	5.7	3.5	6.7	7.5	5.2	1.5	2.7	74.8379
O00303	0.0431373	24.09	422	0.087018	357	13	0.78	0	13.4454	13.4	0.6	4.5	4.5	2	5.6	2.2	4.2	2.8	8.4	3.1	4.5	10.1	3.1	3.4	7.6	7	9.8	0.3	3.1	91.0364
O00305	-0.704615	43.46	0.221	2.05373	520	17	0.42	0	13.0769	6.3	0.8	5.4	6.2	2.3	5	3.5	5	5.4	7.9	1.7	3.7	5.6	4.6	8.5	13.1	6.2	5.6	0.6	2.9	72.7692
O00308	-0.69046	33.45	3.15	0.678064	870	19	2.72	0	7.70115	4.9	1.1	4	7.7	4	7.4	2.6	3.6	4.8	8.5	2.1	5.4	6.8	4.9	6.4	7.1	7.7	4.9	2.2	3.7	66.3448
O00311	-0.408362	38.85	0.314	0.913072	574	25	0.92	0	8.7108	7.5	2.4	5.1	5.9	4	5.4	2.6	5.4	8.7	9.2	2.3	3.8	4.7	5.7	4.5	9.1	5.2	5.6	0.3	2.4	80.7317
O00321	-0.585965	53.22	0.131	1.6769	342	5	4.33	1	17.8363	9.6	3.5	5.6	4.7	1.8	12.9	1.2	1.5	3.2	8.2	0.9	2.3	8.5	3.8	6.1	9.6	6.4	2.6	5	2.6	54.9123
O00322	0.526744	3.49	0.387	-3.72248	258	0	0.4	0	0	8.5	3.9	3.9	4.3	7	7.8	1.6	6.6	1.6	9.3	5.4	1.9	3.9	1.9	4.3	6.6	6.6	7.8	3.1	4.3	92.9845
O00327	-0.486422	56.87	0.737	1.38581	626	18	2.3	1	0	5.3	2.2	7.3	5.1	3.4	7.8	2.7	5.8	6.1	8	3	3.7	6.9	2.9	5.6	10.7	5.9	4.6	0.6	2.4	72.2843
O00329	-0.254981	5.36	15.7	-1.42279	1044	13	0.9	0	13.6015	6.5	2.9	4.4	7.8	4.5	4.7	3	3.5	6.4	13.6	2.7	3.6	5.2	5	5.4	6.4	4	5.9	1.7	2.8	90.6034
O00330	-0.217166	25.55	26.4	1.16854	501	8	1.19	0	0	9	0.8	5.8	6	2.6	7.4	1	7	7.4	9	1.2	2.6	8.6	3.2	5.4	7.4	5.8	7.6	1.6	0.8	93.2535
O00337	0.49923	9.55	3.65	-4.66952	649	5	-0.3	0	31.1248	10.3	3.1	2.8	5.2	6.5	6.6	1.2	5.4	2.9	14.3	2.5	2.3	3.5	3.7	5.4	8	4.2	7.9	2.2	2	110.031
O00339	-0.41318	9.31	2.11	-0.050037	956	12	1.81	0	7.11297	6.2	7.1	6	8.2	3.8	6.5	3.8	4.5	5.9	7.7	2	4.3	2.6	4.1	5.8	7.5	5.3	6.1	0.1	2.7	71.4958
O00341	0.495357	14.29	0.686	-4.11464	560	2	0.3	0	17.6786	9.1	2	3.6	4.6	4.6	6.8	1.6	8.4	3.6	11.6	3.6	3	5.5	3.2	4.1	6.4	6.4	9.3	0.5	2	114.036
O00358	-0.27882	72.92	0.06	1.59355	373	5	4.09	1	46.1126	20.1	1.3	2.4	3.8	3.8	13.4	1.3	2.7	2.7	4.8	1.3	2.1	12.6	1.9	7.2	5.6	4	2.9	0.5	5.4	57.9357
O00370	-0.512	1.96	0.443	0.178309	1275	7	0.04	0	37.8039	4.6	1.5	4.9	5.6	3.7	3.6	2.1	10.4	11.9	9.3	2.1	6	4	4.3	4.9	5.4	7.1	2.8	2.4	3.4	89.5922
O00391	-0.191432	26.64	53.3	-0.684171	747	11	1.48	0	12.1821	12.2	1.9	3.5	6	4.8	6.7	2.8	2.3	4.4	11.1	1.5	3.6	7.2	3.5	7.1	6.6	3.5	6.8	2.3	2.3	84.1901
O00398	0.537168	13.57	0.401	-5.44231	339	0	-0.68	0	21.5339	8.3	5	2.4	2.1	7.4	3.2	1.8	9.1	4.4	11.2	3.8	3.8	3.8	2.4	5	8.3	5.3	5.6	1.8	5.3	103.894
O00399	-0.128947	7.37	9.84	0.856274	190	2	0.04	0	11.0526	6.3	3.2	3.7	7.4	1.6	7.4	1.6	11.1	6.3	5.3	3.2	6.8	7.4	3.7	3.7	3.7	6.8	8.4	0	2.6	94.3684
O00400	0.302368	12.93	1.58	-4.51127	549	7	0.18	0	20.5829	6.7	1.6	4.6	3.5	6.2	7.7	1.1	4.9	5.1	14.4	1.8	3.3	5.3	3.3	2.9	7.1	6.4	7.8	2.4	4	104.754
O00401	-0.835446	67.92	6.26	2.93465	505	22	4.9	0	17.8218	6.5	1.4	6.1	5.5	3	6.9	1.4	3	6.5	6.3	1.6	5	17.8	4.4	5.5	6.7	4.4	5.5	0.8	1.6	58.9109
O00408	-0.19745	13.71	3.04	-0.913469	941	10	0.5	0	0	7.9	3.2	6.9	6.7	3.7	4.9	3.2	5.1	5	12.1	2.7	3.7	4.6	5.7	4.5	6.3	4	6.2	0.5	3.2	92.8799
O00409	-0.823265	74.69	0.147	2.7074	490	19	2.47	1	13.0612	5.7	1.8	6.5	6.5	3.3	6.5	2.9	3.9	7.1	6.9	2	4.5	9.4	3.7	4.7	13.1	4.9	3.3	1	2.2	57.3673
O00410	-0.133637	4.56	210	-0.6791	1097	19	-0.26	1	3.82862	8.8	2.4	6.2	8.1	3.8	4.4	2.6	5.5	5.4	11.8	3.8	4.4	4.2	6.4	3.2	5.1	3.6	6.7	1.2	2.5	95.5971
O00411	-0.332033	17.72	1.92	-0.450144	1230	9	0.76	1	28.0488	8.4	2.5	3.8	6.3	3	5.7	3.3	1.5	5.1	13	2.4	1.5	6.8	7.4	7.6	5.9	4.1	7.9	1.5	2.1	87.6829
O00418	-0.769103	33.24	3.23	2.12627	725	51	2.65	0	7.86207	7.2	1.4	7.9	9	3.4	7.4	4.1	3.2	5.2	8.8	3	4.3	4.4	4	5.9	8.1	3.3	4	1.5	3.7	65.5724
O00421	0.311628	11.05	0.361	-4.08699	344	8	0.59	0	8.13953	6.4	3.5	3.8	4.9	8.1	3.5	2.3	4.7	5.2	14.8	2	3.5	4.4	3.2	4.1	6.4	5.8	7.6	1.2	4.7	104.273
O00422	-0.769281	17.65	74.9	1.72598	153	16	-1.1	1	0	3.9	0.7	5.2	7.8	3.9	5.9	2	5.2	7.8	5.9	3.9	3.3	7.8	3.3	8.5	6.5	8.5	5.9	0.7	3.3	64.3137
O00423	-0.388712	17.42	2.27	-0.817838	815	26	2.29	0	7.60736	4.9	2.1	6.4	4.9	3.8	8.8	3.2	4.5	5.8	7.6	1.2	4.2	3.8	3.4	4.9	9.9	7.6	8.1	2	2.8	75.7669
O00425	-0.427461	18.48	87.1	0.91405	579	21	1.21	1	7.94473	7.8	1	3.3	7.8	2.8	6.7	2.1	7.9	8.1	7.8	1.4	4.1	7.1	7.3	4.5	6.6	5.2	6.6	0.3	1.7	88.1002
O00429	-0.258967	18.48	171	0.770649	736	28	1.23	0	7.06522	6.9	1.2	5.3	7.9	2	5.4	2	7.1	6.1	11.4	2	4.9	5	4.1	6.4	6.4	5.8	7.7	0.4	1.8	101.454
O00442	0.0360656	0.82	29	-0.143011	366	5	-0.59	1	8.46995	8.7	2.5	4.1	6.3	3.6	10.7	1.6	8.5	6.3	8.2	3.3	3.3	4.6	4.1	4.6	4.4	6	7.4	0	1.9	95.1366
O00443	-0.302135	26.63	2.22	-1.65671	1686	52	2.28	0	0	5.7	1.7	5.3	6	4.6	4.4	2.3	5.2	7.2	11.7	1.7	4.4	5.2	5	4.5	8.8	5.9	6.2	1.1	3.1	89.2764
O00444	-0.57701	41.44	0.368	0.447134	970	35	1.61	0	17.2165	5.1	1.3	4.6	5.9	3.8	5.6	2.9	5.4	6.8	7.8	2.7	5.8	5.5	4.1	4.9	11.4	6.8	4.8	0.9	3.8	70.567
O00445	-0.351295	20.73	0.844	0.253535	386	8	0.66	0	0	7.3	1.6	5.4	5.2	3.1	8	2.1	2.8	6.5	10.6	1.6	2.1	8.5	5.4	7	5.4	3.4	9.3	1	3.6	86.8394
O00451	-0.355388	28.02	0.42	0.224535	464	3	0.91	0	6.68103	7.3	6.7	4.7	6	3.7	4.7	1.3	3.4	4.3	9.7	1.9	5.4	5.6	3.7	7.3	10.3	5.8	4.5	0.6	2.8	71.7241
O00458	-0.331707	23.06	3.12	1.00869	451	5	1.48	0	0	8.9	3.1	6	8	4.4	6	2.2	5.1	8	10.4	2.9	2.7	3.1	2.7	5.8	7.5	6.9	3.8	0.4	2.2	80.3326
O00459	-0.626786	15.25	1.06	1.99671	728	23	1.53	0	9.47802	8.7	0.8	5.2	8.8	2.6	6.9	2.3	2.7	4.7	11.5	1.1	2.3	9.5	5.2	8	5.4	4.5	5.2	1.1	3.4	79.5055
O00461	-1.54224	91.81	5.33	4.89138	696	17	1.69	0	36.4943	7.6	0.1	5.6	18.7	1.3	3.6	4.7	1.1	5.9	7.9	1.4	4.7	3.7	13.1	6.5	3.3	2.7	4.9	0.3	2.7	57.0833
O00462	-0.235836	2.05	6.03	-2.57305	879	7	2.09	0	13.8794	4.7	1.9	4.6	6.6	6	5.9	2.4	5.6	4.4	8.8	1.7	5.1	4.4	4.8	3.8	8.8	5.7	7.1	3.1	4.8	81.0239
O00463	-0.534291	11.49	0.891	0.378526	557	2	0.35	0	4.8474	4.7	4.8	4.8	8.4	4.7	3.9	4.1	4.1	8.4	10.4	1.8	5.7	3.6	6.5	4.8	6.1	3.1	6.5	0.5	2.9	80.1257
O00468	-0.258414	23.8	11.6	-0.038624	2067	19	5.27	0	43.5897	9.4	6.9	4.8	5.8	2.8	11.1	2	1.3	2.2	8.6	0.6	2.1	8.9	4.1	7.2	7.2	5.8	7.1	0.7	1.4	68.5638
O00469	-0.358752	4.48	8.57	-0.889512	737	12	0.62	0	10.9905	4.9	1.8	6.6	6.1	5.7	6.9	3.1	6	7.1	8.1	2	6.4	4.9	3	4.5	4.2	4.3	7.9	1.9	4.6	82.7408
O00470	-0.690256	55.64	1.13	1.68099	390	4	3.73	1	18.7179	6.2	1.5	8.5	4.1	2.8	9.2	5.4	4.6	4.4	6.7	4.9	4.6	7.4	5.1	4.9	8.2	4.4	3.8	1	2.3	61.3077
O00471	-0.39548	7.91	7.18	0.16563	708	8	-0.29	0	0	5.8	2.5	5.5	8.6	5.1	4.1	3	6.4	7.8	10.9	2.3	4.4	2.4	6.9	5.2	5.8	4	5.9	0.1	3.4	90.1977
O00472	-0.880156	51.88	0.308	2.33078	640	31	2.33	0	0	5.6	1.2	5	7.3	2	4.5	2.8	5.2	8.4	8.4	1.4	5.6	6.9	5.9	6.1	10.3	4.8	4.2	0.3	3.8	70.875
O00476	0.51381	7.62	0.17	-4.68435	420	1	0.53	0	8.33333	6.2	2.6	2.6	3.1	5.5	7.1	0.7	8.3	3.8	12.9	2.4	2.9	5.5	3.3	3.3	11.2	5.2	7.6	2.4	3.3	110.929
O00478	-0.28339	18.32	1.35	0.089502	584	5	0.73	0	0	8.6	1.5	4.5	8.7	3.1	6.8	2.2	4.6	5	10.6	2.1	2.7	6.5	3.1	5.3	7.7	5.3	6	2.1	3.6	85.3767
O00481	-0.255945	4.87	0.749	-0.341478	513	2	1.09	0	0	7.4	1.8	4.7	6.6	3.9	7.2	2.1	4.1	6.2	10.9	2.1	2.9	5.1	4.1	5.7	7.4	4.9	7	2.5	3.3	86.2963
O00482	-0.402588	45.47	0.277	0.431042	541	6	3.11	1	0	6.1	2.6	4.4	6.1	3.3	5.7	2.8	4.6	6.1	11.1	4.1	4.1	5.2	7.4	5	8.1	3.7	4.8	0.4	4.4	81.3124
O00487	-0.174839	7.1	238	0.131849	310	8	-1.22	0	16.129	6.1	1	5.2	6.8	2.3	7.4	3.9	3.9	6.5	10.6	5.8	4.5	4.5	4.8	3.5	5.2	4.2	10.3	1	2.6	92.6774
O00499	-0.649916	47.89	25.4	1.85147	593	18	1.54	0	0	9.4	0.7	4.9	9.4	3.4	6.6	1.9	2	7.4	8.4	1.5	4	9.1	6.7	2.5	6.9	5.7	6.4	1.5	1.3	68.8027
O00501	0.756422	15.14	1.19	-3.57702	218	0	-0.1	0	24.3119	12.8	5.5	2.8	1.8	3.2	9.2	0.9	2.3	3.2	14.2	2.3	1.4	4.6	3.2	2.8	4.6	6.9	11.5	3.2	3.7	110.505
O00505	-0.118618	19.39	44.3	-0.59642	521	14	-0.4	0	23.6084	6.9	1.7	6.5	6.5	3.1	4.6	1.9	7.9	4.8	10.6	1.2	6.5	5.4	6.7	3.5	5.8	4.8	9.2	1.2	1.3	105.489
O00506	-0.54061	25.12	12.9	1.75313	426	14	0.13	0	0	5.4	0.9	5.4	9.4	4.2	6.8	3.8	6.6	8.2	9.9	1.2	2.3	5.9	3.5	5.2	7.7	5.6	4.5	1.2	2.3	82.4178
O00507	-0.323679	24.74	2.48	-1.79841	2555	29	1.55	0	17.6125	6.2	2.4	6.1	6.9	4.1	5	2.9	6	5.4	11.5	2.2	5.4	4.9	5.3	4.8	6.7	3.8	5.5	1.4	3.4	90.3444
O00512	-0.691304	100	4.06	2.56056	1426	64	5.03	0	52.8752	5.5	0.3	3.2	3.7	2.4	11.6	2.3	3	3.4	5.5	6.3	4.9	17.5	6.9	4.1	10.6	4	4	0.3	0.6	50.1543
O00515	-1.01315	98.07	15.7	3.93534	517	57	0.58	0	35.5899	8.9	0.2	3.3	11.8	0.8	3.9	0.6	2.1	8.7	8.5	1.2	1.7	7.7	5	9.7	14.1	5.4	5.2	0.8	0.4	65.5319
O00519	-0.0186528	5.7	1.98	-0.705278	579	10	2.37	0	0	8.5	2.8	4	5.4	3.6	8.6	1.4	1.6	4.1	13.3	2.6	2.6	6.7	4.5	5.5	7.4	4.8	8.3	1.6	2.8	90.4318
O00522	-0.430707	4.62	0.494	-0.196106	736	21	0.44	0	0	5.3	1.6	3.8	7.5	3.1	5	3.3	6.2	7.7	11.3	2.6	5.4	5.2	5	4.6	6.5	5.3	5.2	1.5	3.8	88.6277
O00526	0.655978	16.85	0.275	-1.19309	184	0	0.2	0	0	8.2	1.1	1.6	2.7	3.3	8.2	0.5	5.4	2.7	16.8	3.8	2.7	6.5	0.5	6.5	10.3	7.6	9.8	0	1.6	123.424
O00533	-0.475745	13.25	46.2	-0.25477	1208	15	1.52	0	11.5066	5	1.6	4.8	8.3	3.6	7.1	2.6	6.2	6.4	7.9	1.2	5.3	7	3.8	4	7.4	6.4	6.6	1.7	3.3	79.3791
O00534	-0.153435	6.87	5.83	-0.929569	786	13	1	0	0	7.5	1.7	4.7	6.2	4.3	6.6	2.4	5	6.1	10.7	3.1	3.2	6.1	4.6	3.7	9.3	5	6.5	0.8	2.7	87.3537
O00541	-0.688605	34.86	58.3	2.06289	588	17	1.05	1	21.5986	8.2	1.2	4.9	12.1	4.4	5.3	2.2	4.3	9.5	9.5	2	2.9	4.3	3.6	7.3	4.3	4.3	5.3	0.7	3.9	77.1769
O00548	-0.451176	14.66	0.384	-0.066373	723	5	4.62	0	20.8852	5.9	9.7	6.2	5.4	3.5	11.2	2.6	2.2	4.4	6.2	0.6	4	6.9	3.2	5.4	7.2	5.5	5.3	1.1	3.5	54.0941
O00555	-0.478412	51.14	0.213	-2.97886	2505	22	4.52	0	16.4072	7.6	1.1	4.8	6.4	5	7.7	2.7	4.6	4.4	8.3	3.4	4.2	6.9	4.2	8	6.5	4.8	5.1	1.3	3	72.6217
O00559	-0.797183	30.05	9.23	1.87176	213	14	0.22	0	0	6.6	1.4	6.1	9.4	4.2	5.2	0.5	4.7	8.9	8	1.9	3.3	3.8	8	6.1	6.6	8	4.2	2.3	0.9	68.2629
O00560	-0.054698	27.18	35.7	0.319139	298	16	-0.81	0	10.4027	7.7	1	5	5	3	7.4	2.3	10.4	5.7	8.1	3	5.4	5	4.7	4.4	8.1	4.7	7	0.3	1.7	100.134
O00562	-0.314791	38.34	1.29	0.128241	1244	27	3.03	0	10.4502	10.5	1.6	4.6	6.8	3.5	8.1	2.5	3.4	3.2	8.4	1.8	1.9	7.6	4.4	5.9	9.9	4.9	6.4	1.5	3	74.9518
O00566	-1.11028	62.56	19.8	5.08081	681	29	1.98	1	37.7386	5.1	0.3	9.7	15	3.4	2.9	1.3	5	13.1	8.7	1.6	3.8	3.2	5.1	4	7.2	4	4.6	0.6	1.5	71.6006
O00567	-0.470707	29.12	170	2.27852	594	45	0.81	1	10.9428	8.4	1.2	3.2	10.1	3.4	5.6	2.4	5.1	10.9	10.3	2	3.7	3.5	3.2	5.2	10.3	3.4	6.1	0.2	2	85.7407
O00570	-0.37468	80.82	4.4	1.74265	391	5	4.94	1	42.711	20.5	0.3	2	3.3	0.5	16.6	5.6	1.3	4.1	5.6	4.6	2.8	8.2	3.8	4.3	6.9	1.5	3.6	0.8	3.6	57.7749
O00571	-0.63429	29.76	229	1.67949	662	80	7.9	1	11.4804	5.6	1.1	7.3	6.2	4.7	11.5	2.1	4.7	4.8	7.1	2.1	3.6	3.6	3	8.3	11.3	3.6	4.7	1.1	3.6	65.1208
O00574	0.54269	11.7	0.078	-5.75437	342	1	-1.4	0	7.89474	5.3	2.6	3.2	2.9	7.9	4.1	3.5	6.7	5.3	12.9	3.8	3.5	2.3	3.8	1.8	7.6	6.1	9.6	2	5	109.649
O00584	-0.582422	16.02	67.7	1.15096	256	3	0.48	0	0	5.9	4.3	5.9	7.4	2.3	5.9	2.7	4.3	7.4	11.3	1.2	3.9	7.8	5.9	5.5	4.3	2.7	4.7	3.5	3.1	80.3906
O00587	-0.165732	15.26	0.12	-0.031166	321	1	-0.57	0	15.8879	6.5	3.4	4.4	4	5	6.2	3.7	2.2	2.8	15.9	1.9	2.8	8.1	5	8.1	6.2	5.6	4.7	1.6	1.9	90.5607
O00590	0.471354	18.49	0.136	-4.89321	384	2	-0.34	0	23.1771	8.6	2.3	3.1	3.6	7.8	5.2	2.9	4.4	2.9	15.4	2.6	3.6	3.6	3.4	4.2	8.1	3.9	7.8	2.1	4.4	108.438
O00591	0.0643182	20.23	0.384	-3.30853	440	5	0.23	0	12.2727	4.3	1.6	4.5	5	7	4.5	1.1	6.1	3.9	10.9	3	5	2.3	3.2	5.5	9.5	8	7.7	1.6	5.2	93.2045
O00592	-0.405556	66.13	11.1	0.785394	558	42	1.63	0	28.3154	8.1	1.4	4.5	5.6	0.9	5	2.5	2.9	4.7	9.3	2	2.9	7.7	5	2.3	13.4	14.9	5.6	0.5	0.9	71.7025
O00602	-0.42454	21.47	5.45	1.04424	326	0	2.21	0	14.1104	8.9	2.5	6.4	4.9	4	14.1	2.1	1.8	6.4	8.9	2.1	4.6	4.6	3.1	4.3	6.4	3.4	5.5	2.1	3.7	66.7791
O00622	-0.38084	8.92	3.87	0.96407	381	8	0.71	0	9.97375	5	10	3.9	6	2.9	7.3	1.6	3.4	7.6	8.1	1.6	4.5	6.6	4.2	6	6.8	5.8	5.8	0.5	2.4	66.7717
O00623	-0.0922006	13.65	0.123	-1.1016	359	4	0.21	0	0	7.8	1.4	3.3	4.5	4.7	4.2	3.9	3.1	5.6	12.8	2.2	2.2	6.1	5.6	4.7	8.9	4.7	7.8	2.2	4.2	92.3398
O00624	0.742141	7.06	0.056	-5.24686	439	0	0.46	0	11.3895	8	2.5	2.5	1.4	6.4	8.4	1.4	11.4	2.5	12.8	2.5	2.3	5	3.2	3	10.7	6.8	5	1.8	2.5	116.674
O00625	-0.562069	0.34	25.7	1.35437	290	5	1.58	0	0	4.8	0.7	4.8	8.3	4.1	10.3	3.8	5.2	7.2	7.6	2.4	3.1	7.2	3.8	4.8	7.6	4.5	6.2	1.4	2.1	72.5862
O00628	-0.0944272	1.86	0.62	-0.277622	323	0	-0.27	0	3.71517	8.4	4	6.5	4.6	4.3	7.4	3.4	4.6	2.8	9.3	0.6	2.2	4.6	3.7	5	8.4	6.5	6.8	3.7	3.1	82.4458
O00629	-0.164299	15.16	48	-0.330545	521	8	-0.25	0	14.5873	6.9	1.7	7.1	6.3	2.9	4.8	2.7	7.9	4.2	10.7	1.3	6.7	5	6.9	3.6	5.8	4.4	8.6	1.2	1.2	104.568
O00634	-0.316897	8.79	0.074	0.851411	580	3	2.37	0	50	11.9	6.7	5.2	2.6	2.6	11.2	2.4	0.7	2.1	9.1	0.7	1.7	9.7	2.6	10.5	7.2	4.5	5.2	1.7	1.7	65.2241
O00635	-0.563656	2.8	4.54	0.359354	465	2	1.78	0	4.73118	3.7	4.7	4.1	8.8	4.5	5.6	3.4	2.6	7.1	10.8	2.4	2.8	3.9	6.9	5.2	7.5	7.1	4.9	1.3	2.8	70
O00712	-0.686667	53.81	5.92	1.10207	420	39	1.24	1	12.1429	4	1.4	5.2	5	3.6	4	3.8	4.5	6.7	7.6	2.1	2.9	12.1	4.8	5.5	11.4	5.2	5.2	1.2	3.6	66.5952
O00716	-0.332258	49.68	0.521	1.57904	465	12	0.94	1	0	9.5	1.5	4.9	6.7	1.1	8.8	1.5	3.9	6.2	13.1	1.5	3.2	7.1	5.6	3	9.9	5.8	4.1	0.2	2.4	87.5699
O00744	-0.421337	14.4	1.34	0.787208	389	3	1.18	0	16.7095	6.9	6.4	3.6	5.1	3.9	9.8	3.6	1.8	4.1	11.3	1.5	3.3	6.2	3.6	10.3	8	3.9	4.4	1.8	0.5	70.7455
O00746	-0.257754	14.97	5.15	1.07881	187	7	0.64	0	0	8.6	0.5	3.7	4.8	3.2	10.7	3.7	4.3	1.6	7.5	3.2	1.1	5.9	4.3	10.7	9.6	2.7	9.1	2.7	2.1	80.8021
O00748	-0.0872987	6.08	7.13	-0.831938	559	2	0.66	0	0	8.1	1.1	4.1	6.1	5.4	8.2	3.2	4.1	3.4	11.1	3.4	3.6	6.8	5.9	4.3	6.8	3.6	7.2	1.6	2.1	88.1038
O00750	-0.363035	25.95	2.1	-1.37362	1634	24	4.06	0	0	6	2.3	6.1	5.8	4.3	6.1	2.8	4.2	5.2	11.6	1.8	3.7	6.2	4.3	6.4	7.7	4.8	5.8	1.5	3.2	84.2595
O00754	-0.296637	7.42	8.235	-1.31438	1011	5	0.41	0	2.67062	8.3	1.2	5.1	4.5	4.4	6.9	2.7	2.8	2.4	10.8	2.1	4.7	6.7	5.6	6.9	5.9	5.6	7.3	2.7	3.4	82.3838
O00755	-0.399713	8.6	0.007	0.182282	349	4	1.17	0	7.16332	7.7	7.2	3.4	5.7	3.2	9.2	2.3	4.9	7.2	6.3	2.3	4.9	3.2	4	7.2	5.2	5.4	5.4	1.7	3.7	67.106
O00757	-0.112684	2.95	3.76	0.40972	339	11	0.09	0	0	8.8	1.8	5.3	5.9	2.4	8.6	0.9	5.3	8	9.7	2.1	3.2	3.8	3.8	3.2	7.1	6.2	8.6	0	5.3	92.3304
O00762	-0.393296	16.76	15.9	1.18728	179	5	0.31	0	0	9.5	1.1	4.5	5.6	2.8	7.3	1.7	3.9	6.7	10.1	2.2	4.5	7.3	4.5	3.4	7.8	6.7	4.5	1.7	4.5	76.9274
O00763	-0.227339	26.24	1.7	-2.21573	2458	36	1.39	0	6.26526	6.9	1.4	5.1	7.2	4.1	6.5	2.7	6.3	4.9	9.6	2.9	3.7	5.3	4.3	5.9	6.7	4.9	7.1	1.2	3.1	89.6013
O00764	-0.207051	0.96	43.8	0.192309	312	10	-0.99	0	11.2179	5.8	1.3	5.8	6.7	2.2	6.1	2.9	4.5	4.5	10.3	3.8	4.2	4.8	5.8	5.8	6.1	4.2	11.2	1	3.2	95.8013
O00767	-0.190529	14.76	9.24	-2.14862	359	12	-0.59	0	6.40669	7.5	0.8	5.6	3.6	5.8	5.8	4.5	5.3	5.3	10.6	2.2	3.6	5	1.4	5.8	6.4	6.1	5.3	2.8	6.4	84.7911
O14490	-0.779836	81.78	0.642	2.43971	977	28	1.83	0	12.1801	7.7	2.4	6.2	6.9	2.5	4.3	2.9	3.6	5.4	6.8	2.5	3.5	6.6	5.4	7.2	12.2	6.4	4.5	0.9	2.4	61.0542
O14493	0.751196	10.05	2.03	-2.87535	209	7	-0.41	0	12.9187	12.9	4.3	2.4	1.9	1.4	8.6	0.5	5.7	3.3	12.9	4.8	3.3	3.3	4.3	2.4	7.7	3.8	10.5	2.9	2.9	116.22
O14495	0.103859	23.47	0.84	-2.28222	311	5	0.17	0	0	7.1	3.5	4.2	2.6	6.4	5.8	2.6	8	5.5	10.3	2.6	4.5	4.5	3.2	5.8	8	4.5	5.5	0.3	5.1	94.4051
O14497	-0.777549	85.16	23.8	2.07984	2285	100	7.46	1	48.14	8.4	0.7	3.4	4.5	1.8	10.8	2	2.4	3.3	6	3.9	4.1	13	9.6	3.8	10.9	4.5	2.9	0.6	3.4	49.8906
O14498	0.025	16.59	7.58	-0.69712	428	0	0.64	0	15.4206	9.1	2.6	4.4	5.6	4	7.9	3	3.5	1.9	15.4	0.5	4	8.2	4.4	3.7	8.2	5.4	5.1	1.6	1.4	97.8271
O14503	-0.577913	59.47	0.479	1.77287	412	10	2.65	1	10.1942	5.8	1.9	4.6	6.8	2.7	6.6	3.6	3.6	7.3	11.4	2.4	2.2	10.2	5.3	4.9	9.5	4.6	3.9	0.2	2.4	75.7767
O14508	-0.476263	13.13	0.199	0.661777	198	1	-0.14	0	0	6.1	2.5	4	6.6	2	8.1	2	4	7.6	11.6	1.5	2.5	5.6	4	5.6	7.6	8.1	4	2	4.5	78.8384
O14511	-0.67	69.41	0.634	1.61691	850	22	4.15	0	31.8824	9.6	3.1	4.1	4.8	1.8	7.2	2.4	2.2	4.5	7.3	1.2	3.1	9.4	4	8.8	13.6	4.4	4.8	0.6	3.2	60.8
O14512	-0.498623	55.94	0.055	1.87057	581	6	2.32	0	15.1463	6.2	2.2	3.8	6.2	3.4	8.8	2.1	2.6	3.8	11.4	1.2	1	15.1	5.3	6.9	9.5	3.6	4.1	0.9	1.9	72.5473
O14513	-0.830487	93.5	0.157	3.5998	1909	56	2.61	0	30.1205	5.4	1.7	4.7	8	1.9	5.7	2.4	2.8	7.3	8.6	1.7	3.5	8.5	5.3	5.9	14.4	6	4.7	0.4	1.1	63.6564
O14514	-0.310354	38.64	0.024	-1.69731	1584	12	4.7	0	14.5202	8.1	3.9	4.5	5.7	3.3	8.1	1.5	3.2	3.7	9.6	1.4	3	8.3	4.4	7.2	7.9	5.8	6.2	2.3	1.8	76.25
O14520	0.401754	21.35	0.026	-3.12273	342	1	-0.14	0	0	8.5	0.6	1.5	3.8	5.6	10.2	3.2	6.1	2.6	10.2	4.4	3.5	6.1	2.3	3.8	7	5.6	9.4	2.3	3.2	99.4737
O14521	0.494969	28.93	1.85	-1.16859	159	0	-2.39	0	14.4654	14.5	3.1	3.1	1.3	1.9	8.2	6.3	2.5	3.1	17	1.9	1.3	4.4	2.5	3.8	7.5	3.1	8.2	3.1	3.1	114.214
O14522	-0.334768	15.54	0.318	-2.34625	1441	25	1.89	0	12.6301	6.3	2	4.6	6	3.5	6.5	2.5	5.3	4.2	7.9	1.9	4.8	6.1	4.9	5.8	6.8	6.5	8.1	1.6	4.5	81.5545
O14523	-0.400142	50.99	1.62	1.17617	706	43	1.96	0	11.3314	8.6	1.1	4.1	7.2	2	6.8	1.3	3.3	3.8	11.2	1.6	2	8.8	4.2	7.6	11.3	7.4	5.7	1.4	0.6	81.4164
O14524	0.137613	17.34	0.747	-3.63814	444	9	0.68	0	8.10811	3.8	3.2	2.3	7.7	5	6.3	1.1	8.1	5.4	11.3	2	3.4	3.8	4.3	4.3	8.1	5.2	8.1	2.3	4.5	102.883
O14525	-0.351382	20.51	0.075	-0.537523	1302	5	2.52	0	3.76344	5.1	3.8	6.3	7.1	2.9	6.7	2.7	4.7	3.8	10.5	2.2	3.8	6.1	4.2	5.4	9.3	5.5	5.8	1.5	2.8	81.0829
O14526	-0.510349	43.31	0.534	1.36949	889	30	3.42	0	20.8099	9.3	1.2	4	7.6	3.8	6.5	2.2	1.5	4.2	9.4	1.8	2	9.6	3.9	7	11.2	5.8	5.6	1	2	68.2002
O14529	-0.673755	72.88	0.129	3.17004	1486	28	2.64	1	31.1575	8.5	0.6	3.8	10	2	6.7	1.3	3.2	6.1	10.6	1.7	2.3	10.6	6.2	5.5	10.6	3.9	4	0.7	1.6	73.7954
O14530	-0.815487	19.91	10.5	2.17702	226	7	1.13	0	11.0619	3.1	1.3	8.8	10.2	5.3	4	3.1	3.5	11.1	12.4	1.8	3.1	2.2	5.8	4.9	5.8	6.2	4.4	0.9	2.2	78.0531
O14531	-0.166084	10.84	3.79	0.386656	572	3	0.64	0	0	10.1	1.9	5.6	5.8	3.5	8.7	3	5.9	5.6	6.5	2.4	3.3	5.4	3.1	5.2	6.5	5.4	8.7	1	2.1	83.8986
O14543	-0.425778	18.22	0.187	0.945529	225	5	1.07	0	0	5.3	1.3	3.6	4.9	4.4	6.2	2.7	2.2	4.4	10.7	1.3	2.2	11.1	5.3	5.8	12.4	5.8	6.2	0.4	3.6	73.6444
O14544	-0.565981	42.99	0.381	1.45334	535	22	1.26	0	12.5234	4.7	1.5	6.4	5.6	3.4	6.4	3.2	3.4	5.6	9	2.6	3.6	6.7	4.7	6	12.5	4.5	6.7	0.7	3	72.2991
O14545	-0.816495	63.75	6.52	2.48109	582	35	3	0	4.29553	6.2	4.3	5	10.1	2.6	6.2	2.9	4.1	3.8	7.7	1.5	5.7	7.9	6.7	6.9	8.2	4.3	4	0.5	1.4	63.8832
O14556	-0.209804	13.24	34.3	0.676415	408	6	0.65	0	11.0294	8.8	1.5	4.9	5.1	2.7	6.4	2.2	5.1	5.6	5.4	2.9	3.7	10	2.9	5.1	6.4	5.6	11	0.7	3.7	81.9118
O14558	-0.07875	13.12	77.2	1.40169	160	3	-1.2	0	28.75	15	0.6	3.1	8.1	3.8	5.6	4.4	1.9	1.9	10	0.6	0	13.8	3.1	6.9	6.2	2.5	10	0.6	1.9	90.3125
O14559	-0.462937	67.91	0.122	1.85763	1287	14	3.43	0	44.289	8.3	1.8	3.5	5.2	3	9.5	2.3	1.6	1.7	11	1.2	1.4	14.7	4	8.4	11.7	3.4	4.4	1.1	1.9	69.9456
O14561	0.0570513	37.18	101	1.13196	156	3	-1.16	0	0	9	1.9	8.3	5.8	2.6	3.8	0.6	5.1	4.5	13.5	4.5	0.6	7.1	5.1	5.8	5.8	3.8	8.3	0	3.8	105.641
O14562	-0.520712	30.42	19.9	1.38417	309	9	0.92	1	0	11.3	0.6	5.8	8.1	1.3	8.7	1.6	3.6	9.1	6.5	3.6	2.6	7.4	4.9	2.9	4.9	5.5	7.4	1.6	2.6	72.0388
O14569	0.729279	19.82	1.65	-2.78288	222	2	-1.14	0	22.0721	12.2	2.3	0	2.3	3.2	8.1	4.1	2.3	3.2	22.1	2.3	0.9	3.6	2.7	4.5	9.5	4.1	7.2	2.7	3.2	127.928
O14576	-0.606977	36.59	2.41	0.709157	645	14	1.54	0	8.99225	6	1.4	6.8	9.5	3.6	5.4	3.3	2.5	5.4	7.4	2.3	3.7	5.1	4.5	5.1	8.2	6	9	2.2	2.5	70.8217
O14578	-0.655205	60.04	1.45	1.80217	2027	59	2.51	0	24.815	7.5	1.8	4.5	11	3	4	2.6	3.9	7.5	11.4	2.5	3.6	4.2	6.4	6.7	7.8	4	4.8	0.6	2.3	81.0212
O14579	-0.344156	5.19	193	0.621957	308	12	-1.17	0	0	11.4	1.3	7.8	7.1	2.9	4.5	2.3	2.9	4.5	13	2.6	2.6	4.5	6.2	5.8	6.5	3.9	5.5	0.6	3.9	89.4156
O14581	0.675081	2.27	0.205	-4.11726	309	3	-0.21	0	0	7.4	3.9	2.9	2.6	6.8	5.5	2.9	7.1	2.6	14.9	4.5	3.6	3.6	2.6	2.3	10.4	6.5	5.8	0.6	3.6	110.162
O14593	-0.309231	1.54	1.21	1.4598	260	4	0.42	1	0	9.2	0.8	7.3	8.5	1.9	7.3	2.3	3.8	3.1	13.1	0.8	3.8	6.9	4.6	3.8	6.9	6.5	6.2	1.2	1.9	93.0769
O14594	-0.537245	57.76	1.46	1.27428	1321	3	3.32	0	18.6223	8.8	2.6	4.6	8	2.9	8.7	3.3	1.9	2.3	6.9	1.8	2.8	9.9	4	6.1	8.6	6.4	6.6	2.1	1.8	62.1272
O14595	-0.139852	22.51	0.096	0.214977	271	5	-0.6	0	0	6.6	3.3	6.3	7.4	5.5	4.8	2.2	5.5	4.4	11.4	1.1	2.6	4.8	4.8	6.3	7	5.2	7	0.4	3.3	93.1734
O14602	-0.994444	29.17	58.8	3.18247	144	5	0.2	0	13.1944	4.9	1.4	13.2	9	2.8	9.7	1.4	7.6	11.1	7.6	1.4	6.2	2.1	2.8	6.9	2.1	2.1	4.2	0.7	2.8	76.5278
O14607	-0.457238	42.46	0.276	-0.712322	1347	19	1.79	1	10.245	7.1	2.7	4.1	5.3	2.9	5.7	3.9	3.7	6.1	10	1.5	6.4	5	5.6	3.6	10.1	5.9	5.7	1.6	3.2	77.1938
O14613	-0.31381	58.1	2.68	1.9661	210	11	1.58	0	0	3.3	0.5	7.1	5.2	3.8	10.5	2.4	5.7	4.3	12.4	2.9	1.4	11.9	4.3	3.8	10	6.2	3.3	0.5	0.5	83.5714
O14617	-0.491761	31.14	44	1.25967	1153	35	2.12	0	10.0607	6.9	1.6	5.6	8.1	2.3	3.6	2.8	5.6	10.1	10.6	2.7	3.2	5.3	4.9	4.9	8.6	3.8	6.4	0.4	2.5	88.4649
O14618	-0.305109	9.49	58.2	1.26513	274	1	3.24	0	14.2336	6.9	3.3	6.6	5.8	1.8	14.2	3.6	4.7	2.6	10.2	1.8	3.6	4	6.9	5.8	5.5	4.4	6.9	0.7	0.4	85.4015
O14626	0.495611	7.52	0.341	-4.78457	319	0	0.47	0	17.8683	5.6	4.4	2.5	3.8	7.2	2.2	1.9	10.7	7.2	11.9	2.5	6	3.8	2.2	3.1	5.6	6.3	7.5	1.3	4.4	115.486
O14627	-0.536972	76.41	0.361	1.33258	284	0	5.51	1	11.6197	6.3	1.1	3.2	4.9	3.2	11.6	2.1	3.2	4.9	4.6	3.5	2.8	8.8	3.9	4.9	12.7	6.7	6	1.8	3.9	53.9085
O14628	-0.761049	9.38	0.105	0.757793	629	10	0.1	1	22.0986	2.7	6.4	3.3	8.7	5.4	6.5	5.4	4.3	10.3	7.2	1.1	4.8	3.5	4.8	3.7	7.8	6.7	3.2	1.1	3.2	56.566
O14638	-0.378971	10.29	0.575	-0.760167	875	13	1.31	0	9.71429	4.8	3.9	5.3	6.3	5	5.1	3.4	4.1	5.5	9.3	3	5.8	7	3.3	4.5	6.3	5.7	5.8	1.6	4.3	73.8514
O14639	-0.716067	47.17	12.5	1.69704	778	76	3.36	0	4.24165	4.9	4.2	5.1	6.3	3.6	7.2	3.7	4.1	6.7	6.8	2.3	2.7	7.8	3.9	7.6	9	5.4	4.1	0.5	4	59.4216
O14640	-0.567626	56.83	1.04	1.55481	695	26	3.45	0	12.3741	7.8	1	5.9	5.3	3.2	8.6	2.4	3.2	3.2	6.6	2.2	3	8.2	3	8.2	12.4	6.2	6.3	1	2.3	64.2878
O14641	-0.566576	58.15	2.93	1.66935	736	72	4.32	0	33.9674	6.2	0.7	4.9	6.7	2.7	10.1	2.7	3	2.4	7.1	3.1	3	11.1	2.2	6.8	12.8	5.2	5.7	0.8	2.9	62.0109
O14645	-0.817442	14.73	0.614	2.35268	258	2	0	0	0	6.6	1.9	3.9	11.2	1.2	2.7	0.8	5	8.1	10.1	1.9	2.3	7.4	8.9	8.5	5.8	5.8	5.4	0.8	1.6	81.2791
O14646	-1.08456	48.71	4.2	4.18908	1710	94	6.61	1	38.0117	4.1	1.2	7.5	9.2	2.6	5.6	3.6	4.8	9.4	8.1	1.5	3.9	3.7	5	6.7	11.8	3.6	3	1.5	3	62.9181
O14647	-1.14092	51.81	2.59	4.8726	1828	63	4.95	1	27.8446	4.3	0.9	6.8	10.4	2.6	5.6	3.4	4.2	10.6	8	1.5	4	4.8	5	7	9	3.6	3.8	1.5	2.7	63.2166
O14649	0.0403553	34.26	1.3	-2.9473	394	12	1.71	0	0	8.6	2.5	2.8	4.3	5.6	9.6	2.5	4.6	2.8	10.7	2.8	2	2.5	4.3	7.4	8.4	7.1	6.1	0.8	4.6	85.6853
O14653	-0.549528	8.49	9.89	0.824105	212	1	-0.95	0	9.90566	3.3	0.9	6.6	6.1	3.8	3.8	3.8	6.1	5.2	12.7	4.2	4.7	1.9	9.9	8	5.7	6.6	5.2	0	1.4	91.934
O14654	-0.663644	79.55	8.87	2.73314	1257	57	14.68	0	50.5171	11.5	1.4	5.3	6	3.5	10.8	1.8	2.1	3.8	6.1	1.9	3.4	9.1	3.6	8.4	10.7	2.9	4.5	0.9	2.2	56.5632
O14656	-0.0253012	8.73	23.8	-0.597547	332	2	-0.79	0	0	6.6	1.8	6.9	5.1	6.3	6.3	2.7	6.9	7.2	12	2.1	4.2	3.3	2.7	4.2	6.3	3	6.3	1.2	4.5	98.9759
O14657	-0.0857143	9.52	2.31	0.120291	336	6	-1.26	0	0	9.2	1.8	5.7	5.7	6.2	6.5	3.3	6.5	7.1	11.3	1.5	4.2	3.6	2.7	5.7	5.1	3.6	6	1.5	3	96.131
O14662	-0.373846	28.31	4.2	0.932454	325	4	-0.83	0	0	6.5	0.9	6.8	8.3	2.5	4	3.1	7.1	4.6	11.7	2.5	3.4	2.5	7.1	8	7.4	4.6	7.4	0.3	1.5	101.077
O14668	-0.451376	42.66	0.25	-0.103645	218	7	0.77	0	0	3.7	1.8	3.2	10.1	7.8	6	1.4	6.4	3.7	6.9	0.9	5.5	8.7	3.7	6.4	6.9	7.3	5.5	1.4	2.8	71.5138
O14669	-0.413366	27.72	0.436	0.956075	202	3	-0.21	0	13.8614	6.4	2	3	8.4	2.5	8.4	3	2.5	0.5	14.4	1	2.5	13.9	3.5	6.9	6.4	5.9	3	2.5	3.5	80.6931
O14672	-0.59893	13.24	18.6	0.27992	748	9	1.65	0	4.81283	4.9	4.8	5.7	5.9	4.4	8.2	3.9	5.3	6.6	6.1	2.1	4.7	5.3	4.5	5.7	7.5	5.1	4.5	0.8	3.7	62.9679
O14678	0.0513201	8.42	1.04	-2.55065	606	4	0.43	0	15.1815	4.8	1.3	5	5.3	5.3	7.3	1.7	5.3	3.8	15.2	2.3	2.1	4.1	5.3	5.6	7.8	6.1	6.3	1.7	4	102.772
O14681	0.294118	17.06	1.6	-3.80693	340	10	-0.02	0	8.82353	7.1	1.5	2.6	3.5	8.8	4.4	2.4	7.4	4.4	13.5	1.8	2.4	4.7	5	5.9	10.9	2.6	5.9	2.6	2.6	105.559
O14682	-0.150085	3.23	0.18	-0.64302	589	18	0.5	0	0	7.8	3.6	4.6	6.6	3.6	5.3	2.9	4.2	5.9	11	2.2	3.9	3.9	3.6	4.4	8.1	5.4	7.1	1.7	4.1	88.0815
O14683	0.385714	8.99	6.7	-1.93205	189	7	-1.79	0	0	7.9	0.5	3.7	3.7	4.2	7.4	1.1	7.4	5.8	14.3	2.6	1.1	3.7	4.2	5.3	6.3	5.8	9	1.6	4.2	118.624
O14684	0.402632	3.95	3.31	-2.13022	152	1	-1.54	0	0	11.2	2.6	2.6	2.6	5.9	4.6	3.9	3.9	2.6	13.8	3.9	2	7.2	2.6	7.2	5.3	3.9	8.6	1.3	3.9	105.263
O14686	-0.647625	84.81	1.9	3.40015	5537	192	5.25	1	40.6899	7	2.1	3.6	7.6	2.2	8.5	2.2	1.9	4	10.6	1.8	1.9	14.6	8.2	4.6	9.4	4.1	3.9	0.6	1.2	67.0255
O14709	-0.818465	29.06	0.43	1.73611	1029	14	0.64	1	21.0884	3.5	5.2	3.1	9.1	3.7	6.1	5.9	4.5	9.9	8.1	1.3	4.1	3.9	5.2	5.7	7.6	4.9	4.1	1.2	2.9	64.2274
O14713	-0.38	28	0.997	1.16567	200	21	0.29	0	16	5.5	2	6.5	6	2.5	7	1.5	5	8.5	10	1.5	3	2.5	4	3	16	5	6	0.5	4	81.4
O14715	-0.55864	45.16	1.33	0.823908	1765	48	1.71	0	17.1671	6.5	1.3	5.4	8.9	3.9	5.3	2	3.7	8.3	10.5	1.4	4.4	4.3	4.2	4.9	9.5	5	6	1.4	2.9	79.6147
O14717	-0.172634	0	0.242	0.581548	391	1	-0.2	1	0	3.8	1.5	4.6	7.7	4.9	4.9	1.8	7.2	6.4	13.3	2	4.3	5.9	5.9	4.3	6.4	5.1	6.1	0	3.8	101.432
O14718	0.394065	11.28	0.241	-4.36535	337	0	0.04	0	16.0237	7.4	2.7	4.2	1.2	4.5	5.9	1.5	11	3.9	7.4	5	5.3	5	1.8	3.3	8.6	7.4	6.8	2.4	4.7	98.9614
O14727	-0.268189	2.08	2.39	-1.35732	1248	19	0.85	0	6.89103	5.2	3.3	6.9	6.2	4	5.1	3.8	5.3	7.1	11.1	2.1	4.2	2.4	4.6	3.8	8.2	5	7	2.1	2.5	89.4872
O14730	-0.608478	23.7	1.41	1.70854	519	14	0.78	0	0	7.3	1.5	6.9	9.8	4.2	5.2	3.3	4	8.7	7.9	3.7	4	4.8	3.3	4.6	6.2	4.2	6.4	1.2	2.7	72.3507
O14732	0.0135417	5.9	3.72	0.483588	288	5	-0.34	0	13.1944	13.2	2.8	4.9	7.3	3.5	7.6	3.1	6.2	3.5	10.1	1.7	1.4	3.1	3.1	7.3	5.6	6.6	6.2	1	1.7	94.9653
O14733	-0.522196	21	2.38	1.41171	419	24	0.73	0	0	5	1.9	5.7	6.4	3.6	6.4	2.4	5.5	8.1	9.8	3.6	2.6	6.9	4.5	7.2	6.9	5.3	5	0.7	2.4	79.1169
O14734	-0.291223	10.03	5.82	0.031258	319	5	0.16	0	0	7.2	2.5	5	5	3.8	6.9	4.4	3.1	3.8	9.1	3.1	1.3	8.2	7.2	6.3	6.9	2.5	8.8	2.2	2.8	80.3448
O14735	0.612676	1.41	35.7	-2.63371	213	0	-0.26	0	0	10.3	2.8	4.2	1.9	7	6.1	3.3	5.6	2.3	16.4	4.2	3.3	4.2	0.9	4.7	8.5	4.2	5.2	0.9	3.8	111.362
O14744	-0.330141	4.4	100	-0.388823	637	12	0.05	1	0	6.6	1.9	4.7	7.4	4.9	5.2	2.8	5.2	4.6	9.6	2.2	4.9	6.9	4.1	5.7	6.6	4.9	6.4	2.2	3.5	82.81
O14745	-0.711453	30.73	108	2.69454	358	31	2.13	0	0	9.8	1.4	5.3	10.1	2.2	7.5	2.2	2.5	6.1	8.9	1.4	4.2	7.5	5.3	6.7	8.7	2.5	6.4	0.3	0.8	73.0726
O14746	-0.200883	18.64	0.13	-0.997423	1132	14	2.63	1	24.0283	8.7	2.6	3	4	4.2	6.6	3	2	3.5	13	1.1	1.9	7.7	4.2	11	6.6	5.1	7.8	1.6	2.5	89.8587
O14753	-0.609363	22.47	0.279	1.4327	267	4	0.45	1	5.99251	4.1	6	4.5	5.6	3	5.2	5.2	0.7	7.9	9.7	2.6	2.2	7.9	4.1	6.7	8.2	5.6	6.7	0.4	3.4	64.5693
O14756	-0.00883281	6.31	2.7	-1.58271	317	1	-0.96	0	0	6.9	1.9	3.8	5	3.8	7.3	2.2	5	4.4	12	3.2	3.8	2.8	4.1	6.3	6	6.6	7.9	2.5	4.4	96.2461
O14757	-0.459244	14.08	4.1	0.764884	476	29	0.4	0	0	4.2	2.1	6.3	6.5	3.8	5.7	2.1	5.7	8.6	10.3	2.3	4.8	5.7	3.8	5.3	7.4	4.2	6.3	2.1	2.9	84.7479
O14763	-0.408636	35.91	1.27	0.964586	440	3	1.28	0	0	7.5	4.1	5.2	8.9	1.6	8	2.3	3.2	4.5	9.1	2.3	2.3	7.3	4.1	6.6	7.7	5.7	7.5	1.1	1.1	77.1136
O14764	0.0435841	23.89	0.307	-2.3999	452	7	0.03	0	10.8407	10.8	0.9	5.1	4.2	4.2	5.5	2	6	3.1	10	3.3	3.5	3.8	3.3	7.1	8	4.9	7.7	2	4.6	95.4204
O14770	-0.604612	56.6	1.27	1.70142	477	8	3.58	1	21.5933	7.1	1.3	7.3	3.6	2.5	9	6.3	3.4	3.6	7.1	5	3.8	10.3	5.7	3.8	8.8	3.8	4.8	0.6	2.3	61.9916
O14771	-0.805447	55.99	0.045	2.08301	459	7	1.64	1	0	7.2	3.3	4.6	9.6	3.9	9.2	4.4	1.5	4.4	7.4	0.7	0.7	7.4	6.5	8.7	8.1	3.9	5.7	2.2	0.9	58.4532
O14772	-0.00988468	2.02	1.3	-1.21938	594	4	0.28	0	0	6.1	2.9	5.4	5.9	5.7	5.9	1.9	6.2	6.6	12.6	2.4	3.9	3.5	3	3.7	9.4	4.9	5.4	0.7	4	94.6293
O14773	-0.179396	5.68	64.8	-0.246002	563	1	1.44	0	0	6.9	1.6	3.6	4.8	4.6	9.4	3.4	2.5	1.4	11.2	0.9	3	7.8	5.7	5.2	10.3	5.5	7.3	1.8	3.2	81.3854
O14775	-0.230886	0.25	1.14	-0.007532	395	1	0.74	0	4.81013	8.4	4.8	6.8	5.3	4.3	7.1	2.8	2.8	6.1	8.1	2.8	3.5	1.8	3	4.6	10.1	5.8	7.3	2	2.5	72.1013
O14776	-0.868033	57.47	68.1	3.35126	1098	21	4.03	1	46.5392	9.9	0.4	4.5	10	3	3	1.4	3.9	8.9	5.1	3.5	1.7	10.8	6.8	6.3	6.1	6.6	5.2	1.2	1.6	60.1457
O14777	-0.749065	19.16	2.08	1.87713	642	27	0.72	0	22.7414	5.9	1.4	4.5	12.8	3.1	4.2	2	5	10	11.1	2.2	5.3	2.8	5.6	4.5	7.3	4.4	4.2	0.6	3.1	80.6854
O14782	-0.777175	26.23	7.72	2.55937	793	20	2.16	0	10.5927	7.9	0.5	4	10.6	2.1	6.2	2.1	4.2	7.6	9.2	3	4.2	5	5.8	7.4	7.3	4.8	4.9	0.5	2.5	74.338
O14786	-0.441062	9.64	12.7	-0.479255	923	24	2.05	0	15.818	4.3	2.4	5.7	6.9	4.2	9.3	2.6	6.5	6.2	6.7	2.2	4.9	5.7	3	4	7.9	5.5	5.7	2	4.1	72.5352
O14787	-0.0535117	4.35	19.8	-1.08347	897	8	-0.1	0	19.621	7	3	6.6	6.8	4.1	4.2	2.5	6.6	4.7	13	3.2	4.2	6	5.9	3.7	5.2	3.7	5.9	1.3	2.2	100.68
O14788	-0.395584	23.97	0.339	-0.156015	317	1	1.49	0	0	7.3	1.3	5.7	4.7	5	7.9	4.4	5.7	5	8.2	2.5	3.2	5.4	4.4	5.4	9.5	4.7	4.4	1.3	4.1	74.1956
O14791	-0.239196	13.07	306	0.441005	398	6	0.18	0	0	9	0.3	4.8	8.5	2.8	7.3	1.5	4.8	6.3	12.6	2.3	4.8	3.3	4	5.3	7.3	4.8	7	1.8	1.8	97.0603
O14792	-0.457655	10.75	0.005	0.38572	307	3	-0.31	0	0	5.2	0.7	5.2	5.9	5.5	5.2	5.2	3.6	5.2	12.4	2	3.9	7.2	5.2	7.2	5.5	2.9	6.5	1.6	3.9	86.3518
O14793	-0.387467	18.93	1.01	0.073081	375	4	1.1	0	0	4	3.7	6.7	6.1	3.7	5.6	1.6	6.9	7.5	8.8	2.4	4.3	6.4	4.8	4.8	5.6	6.1	5.9	1.6	3.5	82.3733
O14795	-0.504085	27.84	0.96	-0.316974	1591	37	1.75	0	6.66248	6.1	2.3	6.7	7.5	3.8	4.7	2.5	4	6.7	9.2	2.4	3.4	4.8	5.6	5.2	7.8	6.2	6.8	1.6	2.8	77.0145
O14798	-0.286486	38.22	0.337	-0.518904	259	2	1.66	0	18.5328	10	5.8	1.9	9.3	2.3	5	1.9	3.5	3.1	3.1	3.1	3.9	9.7	3.9	3.1	8.5	12.7	7.7	0.4	1.2	58.0309
O14802	-0.24777	9.5	4.27	-0.552731	1390	20	0.8	1	14.964	6	2.5	5.3	6.5	4	6.8	2.4	6.7	8.3	10.5	2.8	4.3	4.7	3.8	5.1	5.5	5.5	6.3	0.3	2.7	91.3885
O14804	0.718991	4.45	0.104	-5.56865	337	0	-0.86	0	8.60534	8.3	4.2	3	2.4	8.6	4.2	2.4	6.8	3.3	14.8	1.8	2.1	4.5	3.6	3.6	5.9	6.5	7.7	2.4	4.2	115.163
O14807	-0.450962	16.35	0.995	0.767318	208	1	-0.08	0	0	5.8	0.5	8.2	5.3	4.3	4.8	3.4	6.7	9.6	7.7	2.9	2.4	4.3	5.3	5.3	4.8	6.7	8.2	1	2.9	85.7212
O14813	-0.467254	77.11	3.05	2.03559	284	4	3.54	1	26.4085	14.1	2.1	3.5	5.3	4.2	11.3	1.4	1.1	5.3	8.1	0.7	1.4	12.3	3.5	5.6	9.5	3.5	2.8	1.1	3.2	57.9577
O14815	-0.421449	5.8	0.247	0.212903	690	4	0.7	0	6.95652	7.4	1.7	6.5	8.6	7	5.8	2.5	5.5	6.2	9.9	1.4	3.6	4.5	4.5	5.7	6.2	4.6	4.1	2.2	2.2	79.0725
O14817	0.720588	5.46	2.29	-3.86369	238	0	0.69	0	0	10.5	5.5	2.9	2.9	7.1	8.4	0.8	5	3.8	15.1	2.1	3.4	1.7	3.8	1.7	4.6	7.1	6.7	2.9	3.8	108.655
O14818	-0.432258	5.24	323	1.43232	248	11	0.24	0	0	8.9	1.2	6	8.9	2.8	6	1.2	6.9	8.9	6.9	1.2	3.2	2.4	4	7.3	5.2	5.6	9.3	0.4	3.6	89.2339
O14827	-0.388601	30.8	0.186	-0.005616	1237	18	0.89	0	0	6.9	2.1	5.3	7.4	4	4	2.9	6	6.3	10.8	2.4	4	4.9	4.6	6.5	7.8	5.4	5.1	0.9	2.6	87.2191
O14828	0.0256484	27.38	70	-2.50043	347	16	3.3	0	20.4611	12.4	2	2.3	5.2	8.1	5.2	0.9	3.2	2.9	9.8	2	4.3	9.2	5.2	4.9	7.5	4.6	5.8	1.7	2.9	79.683
O14829	-0.464625	13.78	0.147	-0.248642	653	7	0.65	0	13.17	3.2	1.8	6.1	6.7	4.9	5.4	4	7	6	10	2.5	6.1	3.2	4.1	5.7	7.4	5.5	5.1	1.2	4.1	84.1654
O14830	-0.5	22.18	0.094	0.557742	753	5	0.41	0	0	5.7	2.3	5.8	7.6	4.6	4.9	3.3	5	5.7	10.5	2.1	3.7	3.7	4.8	7.2	9.4	4.2	4.8	1.3	3.2	80.1726
O14832	-0.409467	12.13	3.42	0.354021	338	5	-0.18	0	0	5.6	2.1	4.4	6.8	5.6	6.5	5	5.6	7.7	8	3	4.7	5	4.1	5	5.3	5	6.8	0.9	2.7	78.432
O14836	-0.445051	30.72	0.82	0.381695	293	1	2.06	0	8.87372	6.8	8.9	3.4	5.8	2.7	8.5	2.4	1.7	3.1	7.8	1.4	2	8.9	5.8	8.2	9.9	4.8	5.1	1	1.7	58.942
O14842	0.643667	8	0.004	-2.87332	300	2	1.56	0	44	14.3	3.3	1.3	1	5	11.3	1.7	1.7	2	18.3	0.3	3	7	1.3	5	6.7	4	6.7	2.7	3.3	111.667
O14843	0.394798	18.21	0.475	-4.2687	346	0	0.1	0	15.3179	6.9	3.2	2.6	4.3	6.4	7.8	2.6	3.5	1.7	15.3	1.4	2.3	4.3	4	5.8	8.1	4.3	9.2	2.3	3.8	107.023
O14862	-0.390379	15.45	0.399	1.0589	343	7	0.11	1	13.1195	7	0.6	3.8	7.3	5.5	4.1	1.5	6.1	13.1	8.7	2.9	4.7	3.5	5.5	4.4	5	7	7.9	0	1.5	87.8134
O14863	0.137296	18.88	0.11	-2.20622	429	5	1.41	0	0	7.9	1.6	6.1	4.2	3.7	5.6	3	7	4.2	12.8	2.8	4	3	3.5	4.7	9.6	4.9	7.5	1.2	2.8	106.83
O14867	-0.605842	65.49	0.896	1.5258	736	23	1.98	1	16.1685	5.6	4.6	6.4	9.4	3.5	4.3	1.8	3.8	6.4	9.5	1.2	3.1	5.2	6.7	4.8	11.5	5.6	4.6	0.3	1.8	70.8967
O14874	-0.23932	17.96	6.73	0.661303	412	10	0.72	0	0	7.8	1.2	6.6	4.6	3.6	6.8	4.9	6.8	4.1	11.9	2.7	1.9	5.8	3.4	8.5	5.8	5.3	4.9	0.2	3.2	94.733
O14879	-0.735306	5.31	44.7	1.39976	490	16	-0.07	0	17.551	6.9	2.7	4.7	11	2.9	5.1	2	3.5	8.4	11.2	1.6	6.5	3.3	6.9	3.3	7.3	3.1	3.9	1	4.7	75.4898
O14880	0.281579	0	144	-1.3686	152	5	-0.22	0	0	9.2	2.6	0.7	3.3	4.6	11.8	3.9	5.3	5.3	10.5	2	2.6	4.6	2	3.9	7.2	3.9	8.6	1.3	6.6	95.5921
O14893	-0.391071	14.29	7.46	0.918795	280	7	-0.9	0	0	7.1	2.9	5.4	7.9	2.5	4.3	1.1	2.9	4.6	11.8	1.8	2.9	8.2	6.8	6.8	7.5	3.6	7.9	2.1	2.1	87.0357
O14894	0.556345	7.11	0.011	-2.33897	197	0	1.24	0	22.335	8.1	9.1	2	2.5	3	13.2	1.5	4.1	2	13.2	2.5	5.1	3.6	1.5	5.6	5.1	5.1	8.6	2.5	1.5	100.457
O14896	-0.470021	26.12	5.47	0.859516	467	12	-0.14	1	10.0642	4.5	2.1	5.8	7.3	3.9	5.6	1.9	5.8	6	8.8	2.8	3	10.1	7.5	3.9	6.4	3.6	6	2.4	2.8	78.6724
O14901	-0.301953	66.02	0.417	0.737127	512	18	0.94	1	10.3516	8.2	3.9	5.3	4.1	2.7	5.9	3.1	2.7	4.5	9	2.3	1.8	10.4	4.5	6.1	9.6	7.6	7	0.8	0.6	74.2969
O14904	-0.384384	11.78	0.366	1.07133	365	0	0.95	0	16.1644	10.4	6.6	3	7.1	3.6	8.5	2.7	1.4	5.2	9.6	1.1	2.2	4.4	3	9.6	6.6	6	5.2	1.6	2.2	68.2466
O14905	-0.265266	11.2	0.766	0.39428	357	2	1.01	0	7.0028	10.6	7	3.1	4.8	3.1	8.7	2.5	0.3	5	12	1.1	1.7	4.2	4.8	8.4	8.4	5.3	4.8	1.7	2.5	72.521
O14908	-0.328529	21.32	14.8	1.81473	333	13	1.34	0	13.5135	7.5	0.6	5.7	8.7	4.5	13.5	2.1	4.8	5.7	10.8	2.4	1.8	6.9	2.1	7.2	3.6	4.8	5.4	0.3	1.5	84.0841
O14910	-0.483691	23.61	5.78	1.39111	233	2	-0.08	0	9.87124	8.6	0.9	2.6	9	2.1	6	3.4	3.4	6.4	9.4	2.6	2.1	4.3	9.9	6.4	5.6	6	9.4	0	1.7	86.1803
O14917	-0.428559	34.6	0.364	0.259083	1159	23	2.82	0	12.5971	6.8	1.9	7.1	6.5	2.8	7.4	2	4.4	4.6	8.7	1.6	5.5	6.7	3.8	5.2	8.3	6	7.7	0.3	2.7	80.233
O14920	-0.496032	11.24	12	0.745377	756	62	-0.17	0	8.06878	5	2.4	4.8	8.9	2.4	4.9	1.7	4.5	5.7	12.8	2.9	4.4	4.4	8.1	6	6.9	5.3	5.3	2	1.9	87.9497
O14921	-0.745912	16.35	0.326	1.28371	159	4	-0.65	0	0	5	3.1	2.5	9.4	3.1	0.6	1.3	7.5	8.2	5.7	5.7	5	4.4	5.7	7.5	9.4	5	2.5	2.5	5.7	63.8365
O14924	-0.544091	59.99	0.912	1.86173	1447	31	3.64	0	20.7326	7.3	1.9	5.9	6.6	3.7	9.1	2.4	3.5	5.7	8.4	1.3	3.2	7.1	3.8	6.6	11.6	4	5.9	1	1	70.85
O14925	0.0344498	20.1	10.16	0.250406	209	5	1.5	0	16.7464	9.6	1.4	2.9	3.3	3.8	16.7	1	2.9	3.3	13.4	4.3	5.7	2.9	2.9	4.3	4.3	9.1	3.3	1.4	3.3	82.7273
O14926	-0.435976	1.02	0.029	0.733896	492	1	1.08	0	0	8.3	2.4	6.5	5.9	4.7	9.3	3.5	2	3.9	10	1.2	2.6	4.1	3.3	8.9	6.5	5.1	6.7	1.8	3.3	74.5528
O14929	-0.453699	4.3	92.5	-0.09205	419	12	0.01	0	12.8878	5	1.7	6.2	9.3	6.9	4.3	1.9	4.8	6.9	9.8	3.1	3.1	3.3	5	6.2	4.1	6.2	5.7	0.5	6	78.401
O14931	0.173134	25.37	0.192	-0.677	201	0	-0.38	0	0	8	2.5	2	4.5	3.5	10.9	3.5	3	2	12.4	1.5	1.5	9	3	7	7.5	4	10.4	2	2	98.408
O14933	-0.392157	2.61	23.6	1.04495	153	1	-0.11	0	0	4.6	2	5.2	6.5	4.6	1.3	2	4.6	6.5	13.1	3.3	7.2	11.8	3.3	5.9	4.6	3.9	5.9	1.3	2.6	90.4575
O14936	-0.426242	19.98	6.36	0.197213	926	35	1.12	0	0	6.4	1.7	6	7.9	3.6	5.4	3.8	5.9	6.4	8.7	2.5	3.8	5.4	4.3	5.4	6.4	4.9	7.1	1	3.5	84.3197
O14939	-0.297535	9.32	0.295	-0.811273	933	27	0.5	0	0	6.5	1.5	5.9	5.7	4.1	6.6	3.5	4.4	4.1	12	1.8	2.5	5.6	3.6	7.5	7	6	6	2.1	3.5	87.8992
O14944	0.0715976	29.59	0.568	-1.58281	169	1	-0.07	0	6.50888	4.1	6.5	3	5.9	3	5.9	2.4	4.7	3.6	10.7	3	3	4.7	4.1	5.9	7.1	7.1	9.5	0.6	5.3	91.5976
O14948	-0.62853	68.88	0.48	2.30508	347	6	0.87	1	0	6.1	0.9	7.2	7.5	1.7	5.5	2.6	5.8	5.5	11.8	2.3	3.5	5.5	6.3	5.8	10.1	6.3	2.9	1.2	1.7	82.9683
O14950	-0.777907	18.6	572	2.01067	172	11	0.02	0	11.0465	7.6	0.6	11	8.7	7.6	5.2	1.2	5.2	8.7	6.4	5.2	5.8	3.5	3.5	4.7	2.9	8.1	1.7	0	2.3	57.9651
O14958	-0.508521	11.03	9.48	1.70356	399	8	-0.45	0	32.3308	5.3	0.5	13.3	12.3	6.8	3.5	1.5	6.3	8	9.5	1.5	2.8	4.3	2.5	2.8	4.5	3.3	6.8	1.3	3.5	86.4662
O14960	-0.235099	10.6	1.13	0.757533	151	0	0.44	0	0	7.3	4	2.6	2.6	2.6	10.6	2.6	7.9	7.9	7.3	2	4.6	6	5.3	4	7.9	4.6	4.6	0.7	4.6	80.1325
O14964	-0.697297	68.98	35.5	1.91263	777	35	3.36	0	29.9871	10.3	1.3	2.8	8.4	2.2	5	1.8	2.7	4.9	7.7	3.5	3.1	9.4	10.3	4.9	8.5	4.2	4.6	0.5	3.9	64.3887
O14965	-0.658065	33.75	4.72	1.45252	403	29	1.52	0	0	6	1.7	2.7	7.7	3.2	4.7	3	3.5	7.9	10.7	1	4.7	7.4	6.7	6.5	8.2	4.2	6.2	1	3	79.1067
O14966	-0.386207	12.32	15.5	0.539248	203	12	-0.79	0	0	4.9	2.5	7.4	4.4	3.9	4.4	1	3.9	6.4	8.9	3.4	4.9	2	4.9	5.4	11.3	6.9	7.4	3	3	76.3054
O14967	-0.73377	35.9	4.31	1.9436	610	9	-0.04	0	34.2623	5.6	1.3	9.5	12.1	4.1	5.2	2	6.7	9.7	6.7	2	3.6	7.4	2.5	2.6	5.2	3.3	5.1	3	2.5	72.7377
O14972	0.0565657	0.34	4.47	-0.844464	297	1	0.18	0	10.4377	4.7	2.7	3	7.1	5.1	5.7	2.7	6.7	6.7	10.1	1.7	4.4	5.4	3.7	3.7	6.1	7.7	10.4	0	2.4	100.64
O14974	-1.05515	73.69	47.8	4.75008	1030	138	2.03	0	40.5825	7.3	0.7	6.5	11.7	1.1	4.7	1.2	3.5	8.4	7.4	1.3	3.9	3.1	4.4	7.1	11.7	8.7	4.3	0.9	2.3	62.0777
O14975	-0.0974194	3.06	7.08	-1.62572	620	12	-0.23	0	5.32258	7.4	2.3	6.3	4.7	5	7.1	2.4	5.6	6.6	10.5	1.8	3.5	3.7	2.9	6	3.9	5.8	8.1	1.1	5.3	93.7097
O14976	-0.415713	49.35	14.1	0.505088	1311	59	2.29	0	9.07704	8.7	2	5.3	7	3.9	7.3	2.2	3.6	4.6	8.9	1.9	3.1	9.1	4.5	5.3	9.3	4.2	5.6	1.2	2.4	73.6308
O14977	-0.0828125	7.59	0.736	-0.391522	448	0	1.34	0	0	6.7	2.5	6	7.6	5.8	7.4	2.2	6.7	6.5	7.6	3.1	5.8	4	3.1	0.9	8	3.8	7.6	0.9	3.8	84.4196
O14978	-0.885798	46.56	0.077	2.46131	683	14	1.69	1	21.3763	4	4.1	2.3	11.4	3.1	7.9	5.9	2.5	4.2	9.7	1.6	2.8	8.1	5.6	8.2	8.6	4.7	3.1	1	1.3	60.2635
O14979	-0.951905	42.62	187	2.47933	420	22	16.83	1	17.8571	8.1	0.7	4.8	5.5	3.6	12.1	1.9	3.1	6.7	5.5	1.2	4.3	6.2	6.7	7.9	7.6	4.3	3.6	0.7	5.7	51.881
O14980	-0.09169	4.48	233	-2.35729	1071	20	-0.4	1	16.3399	5.4	1.9	4.5	7.4	5.2	3.5	3	7.1	5.8	11.6	3.6	5.6	3.7	6.2	3.6	5.1	5.7	7.2	1.2	2.7	99.0943
O14981	-0.16874	22.66	7.57	-1.73996	1849	29	0.99	1	12.7637	7.2	2.2	5.5	6.4	2.8	4.7	2.8	5.1	5.7	12.8	2.7	4.1	4.6	5.9	4.8	6.7	5.7	7.5	1.1	1.8	98.6533
O14983	0.0529471	2.7	20.2	-2.25549	1001	25	1.14	0	15.4845	9.1	2.4	5.3	7.9	3.6	6.7	0.9	7	5.3	9.7	2.9	3.8	4.6	2.3	5.1	5	6.4	8.5	1.3	2.3	98.7812
O14986	-0.449074	40.19	0.288	0.693574	540	10	1.12	0	0	5.6	0.7	5.6	7	4.8	5.7	2.4	4.8	7.2	10.6	3	3.9	5.2	3.3	4.6	10.2	5.9	4.3	0.4	4.8	77.8519
O14994	-0.529483	43.45	0.865	1.10268	580	14	2	0	30.5172	7.2	0.7	4	4.1	3.4	6.9	2.2	3.8	5	7.2	3.6	2.9	9.7	7.8	5.3	13.1	4.1	5.5	0.9	2.4	66.2759
O15013	-0.442586	47.33	1.78	0.338245	1369	47	1.99	0	0	7.2	1.5	5.3	8.3	2.5	6	2.8	4.2	5.6	9.4	2.8	3.5	6.5	4.8	4.9	9.5	4.5	7	1.1	2.4	80.84
O15014	-0.88292	94.47	2.28	3.59023	1411	106	3.6	0	31.8923	6.9	1.6	5.4	7.3	0.9	8.2	1.9	2.6	9.1	6.2	1.8	3.3	8.9	4	4.1	13.9	5.2	5.1	0.6	3	55.7406
O15015	-0.916048	27.61	0.396	3.45495	1829	29	2.83	1	38.2176	7.5	4.4	3.7	9	2.1	10	6.3	1.4	3.6	7.3	1.1	3.1	7.2	5	8.5	9	5.2	3	0.8	1.7	51.6867
O15016	-0.534868	65.87	0.031	0.391839	1216	4	2.64	0	33.8816	5.7	3.7	2.5	7.4	2.9	4.5	3.6	3.2	4.9	9.5	2.5	3.2	10.7	8.8	4.2	10.7	4.5	5.4	0.8	1.3	70.8059
O15018	-0.593308	85.63	0.18	2.69901	2839	72	2.86	0	30.4685	7.6	1.5	4.6	6.9	1.6	8.5	2.7	3.4	5.7	8.3	1.6	3.3	8.1	3.9	5.7	13.9	5.2	5.7	0.6	1.1	69.6971
O15020	-0.650837	17.45	8.02	2.64567	2390	39	3.88	0	50.2929	11.8	1	5.4	10.7	2.3	5.2	2.7	2.5	5	11.8	2.1	2.7	3.1	7.2	8.8	5.4	3.9	4.9	1.9	1.5	81.9665
O15021	-0.776477	83.34	0.658	3.74536	2623	111	4.58	0	23.6371	7.2	1.5	4.4	7.5	2.4	7.1	3.1	2.6	6.5	8.5	1.6	2.7	10.4	3.8	6.6	13.3	5	4.1	0.4	1.5	62.3027
O15027	-0.606534	81.23	18.5	1.6646	2179	165	5.32	0	33.318	9.5	1.2	4.2	6.4	2.6	7.7	2.7	1.4	2.8	8.5	1.4	3.9	12.6	5.9	4.8	11.2	3.7	5.5	1.1	2.9	62.9784
O15031	-0.309086	15.23	6.17	-1.76042	1838	24	1.8	0	8.10664	6.7	2.6	5.5	6.7	3.8	6.5	2.4	3.8	4.7	9.9	1.7	3.8	5.9	5	5.7	6.7	6	8.1	0.9	3.4	83.6725
O15033	-0.272539	11.42	0.047	-1.71294	823	14	0.59	0	6.31835	4.9	2.2	3.8	7.4	6.3	5.2	3.4	4.1	5.5	9.4	1.9	4.6	5.2	4	5.3	7.5	5.7	8.4	1.2	3.9	81.774
O15034	-0.581844	54.47	0.128	1.98157	1052	12	2.18	0	0	7.4	1	6.5	8.3	3	7.3	2.2	3.6	4.3	8.4	1.9	3.2	8	4.4	6.7	8.7	4.7	6.7	0.6	3	73.6977
O15037	-0.564602	42.18	1.18	1.27435	678	23	3.67	0	10.9145	8	1.9	5.5	7.4	3.8	10.9	2.8	2.8	4.1	9.6	1.6	1.9	7.2	5.6	8.1	7.7	2.7	5.2	2.1	1.2	71.2537
O15040	-0.26669	32.96	0.346	-0.853984	1411	27	1.35	0	13.9617	6.9	2.5	5.4	5.7	3	7.8	2.2	3.8	4.2	10.1	1.3	2.7	6	5.5	4.3	11.4	5.8	7	2.6	2.1	81.1198
O15041	-0.488645	13.29	0.044	0.197607	775	3	2.09	0	9.03226	5.8	2.7	6.2	7.1	4.6	6.5	4.4	5	6.2	8.6	2.2	3.2	4.4	3	7	6.3	4.9	5.8	1.4	4.6	75.9871
O15042	-1.14286	63.95	52.2	5.17661	1029	76	4.48	1	22.1574	5.1	0.8	5.8	11.7	3.5	4.2	2.2	3.8	10.5	6.9	2.6	4.3	7.4	3.2	7.8	10.5	3.6	3.5	0.9	1.8	56.8902
O15047	-0.896719	73.93	1.7	4.81505	1707	98	5	1	34.6221	8.3	0.8	5	10.3	2.6	6.7	1.5	2.5	4.5	6.3	1.5	2.1	12.3	3.9	7	12	5.3	4	0.6	2.8	54.0832
O15049	-0.869118	63.42	1.12	3.22805	544	18	2.16	0	21.3235	9.4	1.5	3.1	11	2.4	8.1	1.7	1.1	4.4	12.3	1.3	1.5	7.7	7.2	10.3	9.4	3.1	2	0.9	1.7	67.5735
O15050	-0.405162	24.51	0.103	-0.09712	2925	18	1.69	0	33.3675	6.6	2.6	5.8	9	4.6	4.9	2.4	4.9	7.9	11.8	1.9	3.5	4	4.4	6.1	6.1	3.7	5.6	1.3	3	88.0239
O15054	-0.66056	73.1	0.554	2.17779	1643	21	4.44	1	16.0682	8.7	1.8	2.8	6.7	2.3	7.5	2.8	2.3	4.1	7.9	0.9	2.4	16.1	4.1	6.5	9.4	5.7	4.8	1.3	2	62.2885
O15055	-0.556653	69.32	0.469	1.45492	1255	27	3.28	1	21.3546	7.6	2.5	4.4	7.5	3.3	5.8	3.1	2.8	6.1	8.3	2.2	3	9	4.8	4.1	12.4	5.4	5.2	0.6	2.1	65.7849
O15056	-0.429144	40.57	1.44	0.013538	1496	38	1.8	1	0	7.2	1.3	6.1	6.2	4.3	7.2	2.4	3.2	6.4	10	1.4	2.7	7.2	4.6	5.7	7.9	5.8	7	1.4	2	78.9973
O15060	-0.389747	15.45	0.341	-0.145371	712	5	1.8	1	9.69101	5.9	4.2	5.9	6	4.8	6.5	5.5	3.4	5.5	10.1	2	4.6	5.3	3.9	3.8	8.7	5.9	5.3	0.4	2.2	73.9607
O15061	-0.773227	74.19	8.46	3.15316	1565	52	2.12	0	21.0863	8.4	0.4	5	12.5	2.2	8.3	2.2	2.9	4.3	7.7	1.3	1.6	4.3	5.4	8.6	9.5	5.8	6.9	1	1.7	69.8147
O15062	-0.533087	70.9	0.322	1.22481	677	21	2.79	1	13.7371	6.5	2.2	4.7	6.9	4.1	5.6	3.2	2.8	4	7.2	3.7	4.7	6.2	5.9	5.3	13.7	4.9	6.5	0.1	1.5	64.5199
O15063	-0.487196	58.13	0.354	0.30388	1070	26	3.01	0	17.2897	9	2.1	4.3	4.7	3.5	7.6	2.5	2.9	4.7	8.2	2.6	3.6	8.7	8.6	3.9	9.3	5.7	5	1.3	1.9	66.9813
O15066	-0.873226	21.15	3.14	3.1455	747	19	0.72	0	21.419	6.3	0.3	5.2	11.8	2.1	6	2.1	5	9.6	8.4	2.5	4	3.1	5.4	7.4	7.4	4.6	6	0.4	2.4	75.9705
O15067	-0.199253	3.06	93	-0.242608	1338	20	1.77	0	27.13	9.4	2.2	4.9	6.8	3.6	9.9	2.6	2.3	2.5	11.1	1.9	3.3	7.9	4	6.5	6	4.3	7.8	1.7	1.5	84.3498
O15068	-0.552067	25.15	1.15	1.80259	1137	24	1.88	0	0	7.7	2	5.5	9.1	3.3	5.9	2.7	4	6.7	10.7	1.9	2.8	4.6	5.6	6.3	8.4	3.8	5.2	1.1	2.6	80.0704
O15069	-0.444558	95.13	0.173	2.85512	1562	10	2.58	0	42.3175	13.1	1.1	6.3	9.3	1	6.9	1	1.7	2.6	10.4	1.5	0.6	13.1	6.7	2.8	10.1	6.4	4.7	0.4	0.4	73.6172
O15072	-0.618091	25.56	0.234	0.689991	1205	7	4.81	0	8.87967	5.2	4.6	5.7	6.4	2.8	7.1	4.2	4.3	5.4	6.7	2.2	4.7	5.9	4.4	6.1	8	5.1	5.9	1.5	3.5	65.361
O15075	-0.491486	30.41	4.54	1.15653	740	46	2.76	0	0	5.3	1.4	6.2	6.1	3.6	6.5	1.8	5.1	7	7.8	1.5	3.6	5.5	3.1	6.6	11.1	6.4	7.4	0.5	3.4	77.4189
O15078	-0.955143	79.51	0.285	4.72317	2479	35	0.24	0	59.3384	5.4	0.5	4.8	14.9	1.3	2.1	1.7	5.7	12.4	13.1	2.4	5.6	1.4	7.7	5.4	5.7	4	3.9	0.4	1.6	89.9879
O15079	-0.633806	58.91	0.476	1.79469	494	11	4.72	0	0	7.3	2.8	6.7	6.9	1	7.1	1.6	3.4	4.7	8.1	1.8	2.4	7.3	5.7	6.7	11.7	6.1	5.9	0.6	2.2	69.3117
O15083	-1.04629	46.71	0.976	4.15494	957	14	1.59	0	46.2905	6.8	0.3	5.9	12.4	0.8	3.2	4.2	4.1	10	12.7	2.7	4.3	1.7	6.9	7.2	7.5	5.1	2.7	0.2	1.1	80.2821
O15084	-0.11396	1.71	6.96	-0.273133	1053	13	0.57	0	23.0769	12	2.8	6.4	4.7	2.2	7	4.6	3.9	4.5	12.4	1.9	6.6	3.3	2.8	3.5	6.8	5.8	6.1	0.5	2.4	93.2953
O15085	-0.649277	59.46	3.21	2.62308	1522	0	3.17	0	8.93561	6.5	1	6.1	8.7	2.2	6.6	2.5	4.1	5	11	2	2.8	8.9	5.2	6.5	9.9	4.7	4.3	0.7	1.4	77.569
O15090	-0.676538	59.23	0.033	2.29371	1300	14	2.82	1	15.3077	7.1	2.4	5.5	6.7	2.7	8.5	4.2	2.1	7.2	9.5	2.9	3.3	7	5.5	4.5	11.2	3.3	4.4	0.5	1.5	65.0923
O15091	-0.424528	12.86	6.46	0.17127	583	7	0.28	0	0	4.8	2.2	6	5.3	4.8	5.1	2.7	5.1	7.9	11.5	2.1	4.1	3.9	5.5	5.7	7.5	5	5.1	2.1	3.4	84.6141
O15105	-0.398357	31.46	0.04	0.578513	426	3	4.46	1	11.5023	7.3	4.5	4.2	5.6	3.3	11.5	2.8	2.3	4.7	10.6	0.7	2.3	7.7	4	7	7.7	3.5	5.2	1.9	3.1	72.6056
O15111	-0.300671	8.59	5.91	-0.025212	745	12	0.18	0	0	4.6	2.7	4.7	7.8	2.4	5.9	3.6	6.6	6.8	12.2	3.4	3.6	4.3	5.2	4.3	8.3	3.8	5.2	1.6	3	93.0336
O15118	0.222222	5.79	2.15	-6.93849	1278	6	1.25	0	23.2394	6.9	3.8	5.4	3.8	7	6.3	1.5	5.5	3.3	10.5	2.4	4.8	5.1	3.8	3.6	7.7	5	8.2	1.2	4.2	92.9656
O15119	-0.329341	70.39	2.54	1.61545	743	31	3.45	1	13.459	13.5	0.9	4.4	5.2	4.6	6.7	3.2	2.6	5.1	8.6	3.2	2.4	8.3	3.4	5	11	5.5	3.8	0.5	1.9	67.9542
O15120	0.309712	17.27	1.18	-2.13914	278	8	0.77	0	0	9	2.5	2.5	4.7	5.8	6.5	1.4	4	3.6	12.2	3.6	2.9	4.7	4	6.5	6.1	5.8	10.1	1.1	3.2	101.331
O15121	0.0374613	4.33	5.17	-2.49526	323	2	0.15	0	22.9102	6.2	0.9	5.3	4	7.1	5.9	5	9	5	9.3	4	4.3	5.6	1.5	4	4.6	3.4	5.3	2.8	6.8	92.6935
O15123	-0.598992	25.4	0.088	0.25632	496	5	3.77	0	15.3226	4.2	1.8	5	7.5	3.2	5.4	1.6	5.4	7.5	9.1	3.4	7.5	2	7.9	2.8	7.9	6.7	5	2	4	75.4637
O15127	0.14924	37.39	28.5	-3.30484	329	6	2.62	1	9.11854	9.4	2.4	3.3	3.6	9.1	5.2	1.5	4.3	1.8	10	1.5	4.3	6.7	7.3	4	8.8	5.2	7	2.1	2.4	85.4103
O15131	-0.266604	19.4	6.69	0.356944	536	11	-0.78	0	6.71642	6.9	2.4	5.2	7.8	3.5	4.3	1.1	7.1	5	10.6	1.7	6.7	5.6	6.7	5	5.8	4.3	7.1	1.1	1.9	96.5858
O15143	-0.198387	4.3	267	-0.022447	372	15	0.25	0	3.49462	9.1	3.8	4.8	4.8	3.8	7.3	3.2	4.8	7	7.5	1.9	4	3.8	2.2	4.6	9.9	5.4	7	3.5	1.6	77.6344
O15144	-0.439333	5	798	0.394184	300	12	-0.85	0	0	7.3	0.7	6.7	7.7	6.3	4.7	3.7	5	8.3	7.7	2.3	5.3	3	2	5.7	6	5.7	8	0	4	79.9333
O15145	-0.605056	1.69	924	1.0297	178	4	-0.77	0	0	5.6	2.2	5.1	6.7	5.1	5.1	0.6	6.2	10.1	8.4	3.4	5.6	7.3	5.6	3.9	5.1	5.1	2.8	1.1	5.1	70.7303
O15151	-0.604286	60.41	0.383	1.44259	490	18	0.16	0	8.57143	5.3	3.7	8.6	8	2.4	4.7	2.2	4.5	6.5	9.2	1.8	3.7	3.9	5.3	4.5	10	7.1	5.3	1.4	1.8	74.0204
O15156	-0.608534	49.17	5.76	2.46164	539	10	1.61	1	11.5028	9.5	3	5.2	8.3	2.4	9.5	4.5	1.9	3.3	9.1	1.9	1.7	11.5	3.3	6.1	6.7	5.4	3.9	0.2	2.8	63.4508
O15160	-0.280347	2.89	47.8	1.29791	346	11	0.16	1	10.1156	7.5	1.2	7.8	8.1	4.3	5.2	3.2	5.5	4	9	2.6	4	4.9	3.5	7.8	4.3	4	10.1	0.6	2.3	93.2081
O15162	-0.244654	31.13	3.51	-0.113237	318	4	4.02	1	17.9245	4.4	5.7	4.4	5.7	4.7	8.2	1.6	6.3	3.8	6	2.2	4.4	12.3	7.2	2.5	5.3	4.1	6.6	1.3	3.5	71.3836
O15164	-0.604667	52.48	3.57	1.1557	1050	53	2.5	1	16.381	5.8	3.2	4.7	6.7	3.2	4.3	2.6	4.6	6.3	7.8	1.9	5	9	7.3	4.7	10	4.6	5.9	0.7	1.8	71.219
O15165	-0.501961	57.19	0.038	0.537702	306	3	2.57	0	0	4.9	3.6	4.6	6.2	4.2	6.5	2.9	5.6	2	6.5	2.3	5.6	9.8	5.6	6.9	9.8	4.9	5.6	0.3	2.3	68.1699
O15169	-0.793852	68.33	0.483	2.79622	862	31	2.15	0	0	7.8	1.9	5.1	9.4	2.6	7.9	3.7	3	5.6	6.7	1.5	1.9	8.4	4.1	8	8.7	4.3	5.9	0.9	2.8	62.935
O15173	-0.493274	35.43	148	2.00996	223	10	1.22	0	14.3498	11.2	0.4	8.5	7.6	2.7	14.3	0.4	0.9	5.4	11.2	2.2	2.7	3.6	2.2	6.3	6.7	3.1	4.9	1.8	3.6	72.7354
O15178	-0.494023	57.7	0.779	1.06776	435	4	2.56	1	22.5287	8.3	1.1	3.4	5.1	3	7.1	3.9	2.5	3.9	7.8	3	4.8	10.1	3.9	3.9	12.4	4.6	5.3	2.1	3.7	63.954
O15182	-0.734731	13.17	3.11	3.03947	167	3	-1.75	0	13.1737	6.6	0	13.2	13.8	5.4	4.2	1.2	7.2	10.2	9.6	3	2.4	0.6	1.8	7.2	3.6	3.6	4.8	0.6	1.2	85.8683
O15194	-0.192029	21.01	2.43	0.556556	276	5	-0.23	0	0	4.7	2.5	7.6	6.2	5.4	5.1	2.2	5.1	4.7	10.1	1.4	3.3	8	3.6	6.2	8	2.9	9.4	0.7	2.9	91.3768
O15195	-0.446262	11.33	0.633	-0.332963	856	9	0.51	0	0	7.6	1.2	4.8	7.1	4.1	8.8	3.2	3.9	5.3	9.1	2	2.9	4.3	6.4	6	7.4	4.2	6.8	2.2	2.9	77.8154
O15197	-0.19618	12.63	0.147	-1.30438	1021	9	2.39	0	18.7071	9.4	2.7	3.7	5.9	3.5	9.3	3	2.4	2	10.3	1.4	1.7	7	6.3	6.4	8.6	4.8	7.4	1.8	2.4	80.6464
O15198	-0.488865	24.41	1.64	0.468896	467	13	1.63	1	5.35332	4.7	3.6	3.2	6	3.6	5.1	5.4	3	4.7	8.1	1.3	3.9	9.2	4.7	4.9	11.1	4.5	7.5	1.7	3.6	69.8715
O15204	-0.382553	7.87	7.5	0.114659	470	1	-0.3	0	0	4.5	3.6	4.3	6.8	2.8	5.5	4	5.7	7.7	10.2	2.1	6.2	5.3	4	3.2	7.4	6.4	6.2	0.9	3.2	84.5957
O15205	-0.250909	2.42	1.5	0.860724	165	8	-0.2	0	0	4.8	3	5.5	6.7	1.8	6.1	2.4	6.1	10.3	10.9	3	2.4	4.2	3	5.5	7.9	4.8	8.5	0.6	2.4	95.6364
O15209	-0.345899	64.35	0.921	1.32333	634	13	4.01	1	34.5426	8	2.1	4.3	5.8	3	12.8	3.2	1.4	3	7.4	2.4	2.2	10.1	2.7	5.2	11.7	5.2	7.7	0.6	1.3	64.9054
O15211	-0.367696	33.46	2.67	1.60241	777	24	3.26	0	19.4337	7.9	1.2	5	7.3	2.6	9	2.2	2.2	2.4	11.8	1	1.5	8.8	3.2	8.2	11.2	5.1	6.8	1	1.4	82.3423
O15213	-0.602623	22.79	9.12	2.29103	610	6	1.07	1	0	8.7	1.3	4.4	7	3	7.4	3.3	3.4	8	9.5	1.5	2.6	7.4	4.6	8	5.7	4.4	6.6	1.1	2	78.2131
O15217	-0.164865	0.45	1.42	0.440082	222	2	-0.11	0	0	5	0	4.5	7.7	5.4	5	2.7	7.2	7.7	13.5	3.2	4.1	6.3	5.4	5	3.2	3.6	6.8	0.5	3.6	105.36
O15218	0.462871	21.53	0.009	-5.63304	404	0	-0.6	0	14.604	6.2	3.7	2.2	3	5.2	4.5	5	5	1.5	14.6	2.7	3	6.9	2.7	3.7	8.9	6.4	8.7	2.5	3.7	107.574
O15226	-0.73913	38.99	12.1	1.91721	690	36	1.39	1	9.27536	6.1	1.7	4.9	7.4	2.6	6.5	2.2	5.5	9.3	6.2	2.2	4.9	5.1	5.9	5.1	7.7	5.9	5.9	0.7	4.1	69.1014
O15228	0.0445588	5	10.1	-1.48647	680	9	0.06	0	5.88235	5.1	2.1	4.3	7.6	5.9	4.7	1.5	5.3	7.2	12.5	2.9	3.4	4.4	3.2	4	8.2	4.4	8.7	0.7	3.8	99.7059
O15229	-0.081893	2.47	1.42	-1.06468	486	8	0.37	0	6.79012	6	2.1	4.9	3.9	6.8	4.7	3.5	6.8	5.8	9.9	4.3	4.5	5.1	3.5	5.8	8	3.9	5.8	1.2	3.5	87.6749
O15230	-0.2741	22	5.89	-1.70167	3695	28	5.07	0	45.5751	9.2	6	4.6	5.2	3.4	9.4	2.9	1.7	1.7	10.2	1.1	2.7	7.8	5.8	7.5	6.4	5.3	6.1	0.8	2.4	73.1962
O15232	-0.350823	17.08	0.804	0.691168	486	12	1.64	0	5.76132	9.3	5.8	6.2	6.2	2.1	7.6	3.3	4.1	4.7	8.2	1.2	2.5	5.3	3.7	6.4	7.4	6.6	6	0.2	3.3	74.7119
O15234	-1.13144	90.75	5.52	4.15102	703	41	4.67	1	25.0356	6.7	0.3	4.6	9.1	1.6	10.7	2.6	2.3	4.6	4.8	1.6	3.1	14.4	5.4	7.7	8.7	4.1	4.3	0.7	3	46.7994
O15240	-0.985203	83.09	4.06	4.68218	615	4	2.35	0	50.8943	13.5	0.2	3.7	15.8	1.5	6.7	2.3	1.1	2.4	9.3	0.5	1.5	12.5	5.7	9.1	5.9	3.1	3.4	0.7	1.3	63.9837
O15244	0.313874	6.67	0.48	-4.14502	555	5	0.62	0	7.56757	6.8	2.3	3.1	4.5	5.6	7.6	1.4	7.6	3.2	12.8	3.4	3.8	5.6	2.9	5.6	5.6	5	6.7	2.5	4	105.586
O15245	0.451805	6.14	0.922	-3.98555	554	3	0.04	0	14.9819	7.9	2.9	3.6	4	5.2	7.9	1.3	5.8	3.1	15	3.4	3.1	5.4	3.2	4.2	6.3	5.2	7	2.3	3.1	109.314
O15247	-0.517814	4.45	18	1.45766	247	4	1.01	0	0	6.1	2	6.9	8.9	6.5	4	1.2	4.5	9.7	10.9	1.2	5.3	7.3	2.4	4	4.9	5.3	4.5	0.8	3.6	78.9879
O15254	-0.0671429	1.57	3.6	-0.621427	700	7	0.28	0	0	9.4	1.9	5	5.9	5.1	7.1	2.7	3.3	4.7	13.1	1.7	2.6	4.9	3.9	5.9	8.3	3.3	6.7	1.3	3.3	92.9714
O15258	0.0811224	18.37	46.1	-2.76808	196	10	0.18	0	8.67347	5.1	1	4.1	3.6	8.7	6.1	2.6	6.6	6.1	8.2	4.1	1.5	5.6	2.6	6.1	6.1	5.1	8.2	2.6	6.1	86.4796
O15259	-0.485246	25.68	0.23	1.16251	732	13	1.22	0	10.3825	5.5	1.4	5.1	10.4	3.6	5.6	1.8	4.9	5.2	11.7	2.2	3.7	4.8	5.5	6.4	7.9	5.5	5.3	1.8	1.9	85.9153
O15260	0.562825	1.12	123	-3.88901	269	5	-1.2	0	24.1636	6.7	1.5	4.1	3	8.2	8.2	1.1	5.2	4.1	16	4.8	3	2.2	4.5	3.3	5.6	5.2	7.4	2.6	3.3	110.892
O15264	-0.389041	4.66	4.33	0.681077	365	8	-0.34	0	0	6.6	0.8	6	6.8	4.9	4.9	2.7	4.7	8.8	10.4	3.6	2.2	4.7	5.2	4.9	5.8	5.2	6.3	1.4	4.1	83.6164
O15265	-0.751682	86.1	0.64	2.48742	892	41	2.46	0	27.9148	6.3	2.2	3	4	2.1	6.4	3.9	2.5	6.6	6.5	1.9	4.1	12.1	4.9	5.8	15.8	4.9	5.5	0.4	0.8	57.1861
O15266	-0.642123	80.48	0.603	2.18647	292	7	2.02	1	0	10.6	1.4	5.1	8.6	3.8	8.2	4.5	2.1	7.2	9.9	2.1	3.4	4.1	5.1	6.5	6.8	3.4	5.1	0.3	1.7	72.2603
O15269	-0.064482	3.59	44.5	-0.030363	473	7	0.36	0	0	8.9	2.1	3.8	9.3	4	6.3	2.1	7.2	6.3	11.4	1.7	3.2	4.7	4	4.9	5.7	3.8	6.8	0.6	3.2	101.057
O15270	-0.196797	13.52	13	0.160184	562	11	1.06	0	5.16014	8	2.1	3.9	7.7	3.7	9.1	2.3	5.9	5	9.1	3.2	4.1	3.7	2.5	6.9	5.2	4.8	6.9	0.7	5.2	86.4235
O15273	-0.644311	8.38	1.25	2.10914	167	6	-0.05	0	0	6	3	2.4	12.6	1.2	6	1.8	2.4	3	11.4	3.6	0.6	6.6	9.6	8.4	6.6	6	5.4	1.8	1.8	75.3293
O15287	-0.123473	2.09	0.144	0.322989	622	4	0.11	1	29.9035	10.5	2.6	4.8	7.1	2.1	5.6	1.6	1.6	3.2	19.5	0.8	1.4	5.8	7.1	6.3	8	4.7	3.9	2.1	1.4	103.778
O15294	-0.242447	1.15	23.2	-0.408527	1046	16	1.01	0	16.7304	10.5	2.1	5.4	5.7	3.3	5.4	3.6	5.9	5.1	10.4	2.8	6.2	5.1	4.5	4.6	5.1	4	5.4	1	4	89.7992
O15296	-0.173373	0	1.88	-0.582842	676	2	0.1	0	0	7.2	1.6	4.1	6.7	4.7	6.8	2.8	4.7	3.4	12.4	1.6	3.3	7.8	5.3	5.2	6.1	5.5	5.6	2.4	2.7	90.4734
O15297	-0.51686	42.15	2.17	1.31317	605	19	0.55	0	0	6.9	2.1	4.6	6.3	2.6	6.9	2.3	3.8	6.1	7.6	3	4.3	8.3	4	7.1	8.8	5.1	7.4	1.3	1.3	72.9917
O15303	0.0119726	7.75	0.248	-2.58766	877	6	1.74	0	10.2623	10.3	2.5	3.8	5.4	3.8	8.1	1.5	5	2.9	9.5	2.1	2.5	6.4	3.6	7	7.2	6.3	7.9	1.5	3.1	89.5553
O15304	0.0125714	11.43	0.651	0.466057	175	5	-1.28	0	9.14286	10.3	9.1	4.6	5.7	2.3	9.1	1.1	1.7	4	8.6	2.3	0	5.7	4.6	7.4	8	3.4	9.1	1.1	1.7	76.9143
O15305	-0.43374	1.22	78.8	1.1685	246	9	3.68	0	0	4.1	2.4	7.7	6.9	6.5	8.9	1.2	6.9	8.5	8.5	2	3.7	4.1	4.5	5.7	4.1	4.5	5.3	0.4	4.1	79.6341
O15315	0.053125	7.03	1.6	-0.14562	384	1	-0.66	1	0	7.6	3.1	3.1	8.1	3.6	5.7	2.1	5.7	4.4	14.1	2.1	2.1	4.2	4.9	4.4	9.9	6.8	5.5	0.5	2.1	100.599
O15318	-1.47623	40.36	3.02	4.64962	223	3	1.01	0	39.9103	5.4	0.4	11.2	16.6	2.7	7.2	0	2.2	12.1	4.9	4	3.6	6.7	1.8	5.4	3.1	4	2.7	0.9	4.9	41.1659
O15321	0.255941	5.28	1.885	-6.12002	606	0	0.6	0	11.8812	4.8	1.5	3.8	4.5	6.9	8.6	3.3	6.8	2.1	11.7	2	3.1	4	2.5	5.6	7.4	5.3	8.6	2.6	5	101.749
O15327	-0.370346	24.46	6.25	-0.147376	924	20	0.55	0	0	4.5	2.1	5.3	8.2	3.7	5.3	2.8	5.6	7.1	11.6	2.4	4	5.2	5.2	4.4	7.6	5	6.3	0.6	3	89.8593
O15335	-0.239833	7.24	3.31	0.643049	359	0	-0.56	0	24.5125	8.4	2.5	4.7	3.9	4.5	4.5	3.6	2.5	6.4	17.5	0.8	7	5	4.2	6.4	6.7	3.9	4.5	1.1	1.9	99.4986
O15344	-0.338831	5.7	1.64	-0.744052	667	18	0.93	0	4.49775	6.6	4.5	5.1	6.9	3.1	3.4	3.7	6.4	5.8	9.6	1.2	5.2	4.3	4.6	4.9	7.9	7	5.7	1.2	2.4	85.6822
O15347	-1.4135	43	142	3.94559	200	10	0.98	1	35.5	7.5	1.5	6.5	15.5	5	6.5	0.5	2	20	2	3	3.5	6.5	1	3.5	5.5	2	4	1	3	34.7
O15350	-0.519811	56.92	66.4	0.835435	636	15	2.69	1	0	6.6	1.7	4.2	5.3	3	7.7	3.8	3.8	3.6	7.4	3.1	3.9	9.1	6.1	5	9.7	6.1	5.8	0.6	3.1	67.0126
O15353	-0.462346	74.38	0.007	1.16517	648	2	3.86	1	16.5123	7.1	1.7	4.2	5.1	4	9.4	3.7	2	4.6	10.5	2	1.7	16.5	4.2	2.5	10.3	4	2.9	0.8	2.8	64.3519
O15354	0.0603589	33.44	0.024	-2.90667	613	3	1.86	0	4.73083	9.5	4.7	2.6	5.5	4.2	7.8	1.1	5.5	3.4	11.1	2	3.4	6.2	3.1	6.7	7.3	6.2	5.1	1.8	2.6	89.0212
O15355	-0.805861	37.18	93.6	3.8653	546	32	3.6	0	23.4432	7.9	2.2	8.2	15.2	1.8	9.3	1.5	4	6.4	6.6	2.6	3.7	4.8	2.9	3.3	7.7	4.8	4.8	0.4	2	63.1136
O15357	-0.481161	44.44	11.1	0.934342	1258	56	2.67	0	9.30048	6.7	1.1	5.4	7.2	3.7	7.4	2.1	3.7	5.2	10.6	1.1	2.5	9.3	4.2	6.4	8.9	5.4	5.7	1.1	2.2	78.7679
O15360	-0.0244674	15.46	0.367	-2.65897	1455	18	0.93	0	28.7285	9.1	2.6	4.5	6.6	5	4.1	3.4	3.1	3.2	14.6	1.9	1.5	5.4	5.5	6.3	9.9	3.8	6.5	1.5	1.4	96.7629
O15370	-0.960317	66.03	0.354	3.75704	315	4	2.58	1	35.2381	11.7	1	6.3	11.4	1.9	11.7	1.6	1.9	4.1	6	2.5	0.6	11.7	3.2	9.5	5.7	2.5	2.9	1.9	1.6	50.9841
O15371	-0.842336	14.6	165	1.90792	548	25	2.78	1	0	5.1	2	7.5	8.6	4.6	4.7	1.3	4.4	7.1	6.6	2.6	5.1	3.8	5.8	7.7	6.9	4.9	5.7	1.8	3.8	64.2153
O15372	-0.552557	11.36	118	0.737331	352	18	-0.4	1	8.80682	6	0.9	4.8	7.7	3.1	6	2.8	4.5	7.4	9.7	3.7	4.3	3.7	8.8	3.7	7.7	4.5	6.2	0.6	4	79.4886
O15374	0.420534	15.61	0.37	-5.07567	487	8	0.23	0	15.1951	7.2	1.8	2.9	3.7	7.6	7.6	1.8	7.6	4.7	12.5	2.3	3.3	3.7	2.5	2.5	9	7.4	5.7	2.3	3.9	102.341
O15375	0.53703	19.8	0.197	-4.73456	505	3	-0.64	0	21.1881	9.7	3	2.2	2.8	6.9	8.9	1.8	4.8	2	14.3	3.2	2.4	5.7	4	4.2	8.1	4.8	6.5	2.6	2.4	102.792
O15379	-0.348131	10.05	2.5	-0.139942	428	7	0.66	0	6.7757	5.4	2.8	7.7	6.3	5.8	7.5	4.4	5.1	3.5	8.2	1.9	4.9	4.9	4	4.2	5.1	4.2	6.8	0.5	6.8	76.9626
O15381	-0.427804	35.16	6.67	1.82491	856	37	1.31	1	0	7.7	2.1	6.7	8.3	2.9	6	1.4	5.1	7.4	10.6	2.5	3.6	5.6	4.2	6.8	7	4.1	6.4	0.2	1.4	87.8505
O15382	-0.0721939	6.63	114	-0.541919	392	2	0.47	0	0	5.9	1.8	3.6	5.9	4.1	8.4	2.3	3.8	4.6	13	3.3	2.6	7.1	5.1	6.4	4.3	4.3	8.2	2.8	2.6	95.2041
O15389	-0.319964	19.06	0.526	-0.243825	551	7	1.02	0	0	6	2.9	3.3	6.7	3.1	7.6	1.3	3.4	4.2	12.3	1.3	3.4	8.3	4.7	5.8	10.5	5.3	4.9	2	2.9	81.7786
O15391	-0.732796	35.75	3.7	1.7602	372	8	0.87	1	0	4.8	2.4	6.5	7.3	3.8	7	4	3	7.5	8.1	2.7	4.6	7.3	5.1	3.2	8.6	6.5	4.8	0.8	2.2	61.8548
O15393	-0.248374	21.75	1.77	-1.07286	492	4	2.11	0	14.0244	6.7	4.5	3.9	3.3	2.2	8.7	2	4.5	4.9	6.7	2.2	6.5	6.9	4.5	3	8.9	5.1	7.7	3	4.7	72.7033
O15394	-0.411828	14.46	4.7	-0.245093	837	15	0.09	0	7.8853	5.5	1.7	4.8	8.7	2.9	7.2	1.8	7.9	6.9	7.2	1.4	5.1	5	4.2	4.2	8.1	6	7	1.1	3.3	84.6476
O15397	-0.174156	10.61	6.64	-1.76334	1037	12	0.27	0	7.61813	6.3	1.8	5.8	8.5	4.1	3.2	2.6	7.6	5.4	11.8	2.8	4	4.1	6.8	4.2	4.6	4.8	6.7	1.4	3.7	101.157
O15399	-0.19229	37.43	0.068	-1.24746	1336	8	3.24	0	42.8144	11.3	1.9	4.2	4.9	3.8	10.3	2.6	2.7	2.2	9.7	1.6	1.8	11.3	2.2	7.7	7	3.7	6.2	2.2	2.7	77.7769
O15400	-0.630651	24.14	149	0.996299	261	18	-1.92	1	21.4559	5.7	0.8	5.4	8.8	2.3	3.8	1.5	9.2	5	7.7	1.5	3.8	3.1	12.3	6.9	8.4	5.4	6.1	0.8	1.5	89.272
O15403	0.499426	23.52	0.069	-4.80934	523	13	-0.36	0	15.87	8.4	2.1	2.9	5	7.6	7.6	1.9	8.2	4.4	10.7	3.1	2.5	4.2	2.7	3.8	8	5.2	8.2	1	2.5	106.08
O15405	-0.692708	95.14	1.18	1.41805	576	2	3.76	1	17.1875	8.9	0.2	3.1	3.5	2.6	4	3.3	4.2	4	7.8	3.8	3.6	8.7	17.2	2.6	11.3	5.6	3.8	0.2	1.7	66.6493
O15409	-0.755944	73.71	0.215	1.07483	715	11	2.41	1	17.7622	6	1	3.1	5.7	1.4	4.2	3.4	3.8	3.5	10.1	2.7	4.2	6.2	17.8	3.6	10.6	5.6	5.2	0.7	1.4	75.021
O15417	-0.703942	95.75	0.57	5.01457	2968	122	5.01	0	50.1011	11.6	1	4.3	8	2.1	9.1	2.1	1.3	6.4	9.1	1.4	1.1	11.4	3.7	6.9	11.1	3.5	3.8	0.6	1.5	63.2345
O15427	0.66172	15.27	16.4	-4.57566	465	6	0.4	1	29.6774	9.7	2.4	3	3.7	7.5	11.6	1.1	4.3	3.4	12.9	2.8	1.7	6	1.7	3.9	6.5	3.4	10.5	0.9	3	107.333
O15431	0.282632	33.68	2.01	-2.34831	190	6	0.09	0	15.7895	6.3	1.1	2.1	3.2	6.3	8.4	6.8	5.3	3.2	8.9	8.9	3.2	3.7	3.2	1.6	9.5	6.3	7.4	0.5	4.2	83.1053
O15432	0.791608	17.48	6.14	-3.46885	143	8	-1.14	0	0	8.4	0.7	3.5	1.4	5.6	7.7	4.2	6.3	2.1	14.7	3.5	2.1	2.8	3.5	1.4	9.1	4.9	11.2	2.1	4.9	122.657
O15438	0.233268	14.34	1.29	-6.2075	1527	16	0.72	0	21.5455	8.5	1.6	4.3	4.6	4.8	6.4	2	5.8	3.8	13.4	2.4	3.3	4.5	4.3	4.8	7.6	4.8	8.2	1.9	2.8	107.086
O15439	0.078717	12	5.45	-4.66063	1325	27	-0.38	0	19.6226	7	1.2	4.3	5.7	5	5.5	2.1	7	5.7	12.6	2.2	3.5	3.5	4.3	4.9	7	6.1	7.5	1.8	2.9	105.215
O15440	-0.0163535	18.65	0.321	-3.62223	1437	28	1.06	0	6.81976	7.5	1.3	4	6.4	4.4	6.2	2.6	6.8	5.8	11.6	3	3.1	3.4	3.8	5.8	8.2	5.6	6.9	1.2	2.3	99.4154
O15442	-0.269018	2.76	0.022	-0.290153	326	0	1.54	0	0	4.6	1.5	4.9	4.9	4.9	6.7	3.7	4.9	3.4	8.6	2.5	4.6	8.6	5.2	4.9	5.5	4.9	8.6	2.5	4.6	82.1472
O15444	-0.115333	50.67	0.073	0.038399	150	3	-1.71	0	0	10.7	3.3	1.3	2	4	6	4	3.3	7.3	11.3	1.3	6	4.7	3.3	6	10.7	2.7	6.7	2.7	2.7	87.2
O15446	-0.964706	79.22	12.1	4.21982	510	36	1.8	1	36.4706	8.2	1	2.2	11.8	1.8	8	0.8	1.6	10.8	6.9	2.5	1.6	13.9	7.1	4.1	5.3	7.3	4.9	0.2	0.2	55.3333
O15455	-0.104535	4.65	0.166	-1.81903	904	10	0.19	1	31.0841	3.5	1.9	3.9	6	6.4	3.8	3.8	6.3	6	16.2	1.4	8.5	3.5	4	3.3	8.6	5.1	4.3	1.5	2	103.628
O15457	-0.239957	15.81	0.027	-0.600137	936	15	3.83	1	19.4444	6.7	2	3.7	6.6	3.6	4.3	1.5	7.6	5.9	9.8	2.4	5.3	4.4	4.6	4.5	10.3	7.4	4.7	0.2	4.5	88.2799
O15460	-0.436262	5.23	12.6	0.434432	535	6	1.47	0	0	8.4	1.3	6.2	8.8	3.6	6.5	2.4	2.8	5.4	10.8	2.1	2.8	3.9	3.6	6.7	5.4	5.8	6.9	2.1	4.5	81.6822
O15466	-0.151862	11.44	0.099	-1.42589	376	6	-0.59	0	12.766	4.8	3.2	3.2	5.3	6.9	4.5	2.9	5.3	5.3	9.8	2.4	5.3	4.8	2.9	6.9	6.6	5.3	7.2	1.3	5.9	84.734
O15479	-0.603135	33.86	7.61	1.88114	319	15	0.52	0	10.0313	8.2	0.9	3.1	10	4.1	6.9	1.6	2.5	10	8.8	1.6	2.8	6.3	3.1	4.7	10	5.6	6	1.3	2.5	69.4357
O15480	-0.595087	39.6	0.094	1.21431	346	9	-0.02	0	13.0058	6.9	0.9	3.5	5.2	4.3	5.5	1.7	3.8	13	8.1	4.3	4	3.8	5.2	5.2	9.2	5.8	5.8	1.2	2.6	69.9133
O15481	-0.725723	39.6	0.965	1.91106	346	7	0.66	0	0	7.5	0.6	3.5	8.7	3.2	4.9	1.2	2.9	7.2	9.5	3.2	3.5	6.4	5.2	7.2	10.7	7.2	3.8	0.9	2.9	66.8786
O15482	-0.450244	28.29	0.02	1.11405	410	8	1.4	0	0	7.1	2.9	2.9	9.8	2	4.1	3.2	3.2	4.1	14.4	2	2.7	6.1	7.8	6.3	10.5	3.7	4.4	1.2	1.7	88.2927
O15484	-0.520781	0.47	1.91	-0.061667	640	1	1.16	0	0	5.9	2.7	6.2	6.6	4.4	6.7	3.6	4.5	5.9	8	1.2	4.1	4.8	4.1	7	6.4	5	7.2	2.7	3	75.5312
O15488	-0.300998	28.74	0.497	0.117515	501	13	1.08	0	0	7.4	2	5.2	7.4	4.4	5.6	3.4	3.2	3.6	10.8	1.4	3.4	6.6	5.4	3.6	10.8	6	6.4	1.4	2.2	80.3992
O15492	-0.472277	20.3	0.265	1.53111	202	6	-0.12	0	0	10.9	3.5	4	10.4	7.4	4	3.5	2.5	7.4	9.9	1.5	3	2.5	2	5.4	9.9	8.4	1.5	1.5	1	63.4653
O15496	0.0272727	18.18	0.305	-0.270197	165	1	2.88	0	10.303	5.5	10.3	3.6	6.1	1.8	9.7	2.4	3.6	3.6	15.2	1.8	2.4	8.5	4.2	4.8	4.2	3	3.6	1.2	4.2	89.2727
O15498	-0.289899	0	55.2	0.602819	198	6	-1.69	0	0	7.1	1.5	6.1	7.1	4	3.5	2	3.5	7.6	10.1	2.5	2.5	3	4.5	5.1	10.6	5.1	9.1	0.5	4.5	86.6162
O15499	-0.423415	63.41	0.086	2.21874	205	4	1.46	1	41.4634	17.1	4.9	0.5	6.3	2	10.2	1.5	2	3.4	8.3	0.5	1	12.2	3.9	12.2	7.3	1.5	3.4	1.5	0.5	66.9268
O15503	0.267148	28.16	0.482	-2.27955	277	0	0.03	0	0	10.8	2.5	2.9	2.5	4.7	8.3	3.6	4.7	1.8	11.6	1.8	3.2	7.2	2.5	5.8	9	4	7.9	2.9	2.2	97.2202
O15504	-0.440662	66.43	2	1.33973	423	15	5.52	1	24.5863	8.3	0.7	3.1	4.3	7.8	9.7	0.9	2.8	5.2	6.1	0.9	5.9	7.3	4.7	3.8	16.8	4.7	4.3	1.4	1.2	55.6501
O15511	-0.403974	3.31	509	1.81735	151	6	0.02	0	0	9.9	0.7	8.6	6	2.6	7.9	0.7	4	9.3	7.9	2.6	5.3	2.6	4	4	8.6	3.3	9.3	0.7	2	83.3113
O15514	-0.630986	11.27	14.8	2.39983	142	3	-2.38	0	14.7887	8.5	1.4	4.9	14.8	5.6	2.8	2.1	3.5	6.3	12.7	2.1	3.5	2.8	6.3	5.6	7.7	4.9	2.8	0	1.4	79.7887
O15516	-0.609456	68.44	0.637	-0.117038	846	22	1.81	1	32.1513	4.4	1.1	3.9	5.4	4	4.3	3.5	4.5	4.1	8.4	3	3.3	5.4	12.1	4.4	12.4	7.7	5.3	0.6	2.2	70.0473
O15519	-0.354583	13.12	0.451	0.581126	480	8	0.17	0	14.1667	4	2.1	6.5	7.1	3.3	5	3.1	4.8	7.9	14.2	3.1	2.7	3.3	5.4	6.2	8.1	2.5	6.5	0.6	3.5	96.625
O15520	-0.378846	30.77	0.013	-0.511822	208	3	0.01	0	0	5.8	4.3	1.4	4.3	4.8	6.7	3.4	3.4	8.7	7.7	2.4	7.2	3.8	2.9	4.8	11.1	4.3	6.7	1.9	4.3	68.4135
O15522	-0.586611	69.87	0.398	1.91028	239	1	2.89	1	25.1046	13.4	1.7	3.8	6.3	2.5	7.5	2.1	0.4	3.3	10.9	0.4	0.8	11.7	5.4	9.6	9.2	2.9	4.2	1.7	2.1	69.5816
O15523	-0.635303	31.52	42.1	1.56513	660	25	8.36	1	11.9697	5.3	1.2	7.1	6.2	4.4	12	2.3	4.8	5	7.1	2.1	3.8	4.1	3	8.3	9.7	3.6	5	1.1	3.8	66.4848
O15524	-0.357346	24.17	0.455	1.14526	211	0	1.19	0	13.7441	12.3	2.4	3.8	4.3	5.7	4.7	3.8	2.4	0.5	8.5	1.4	2.4	9.5	3.3	13.7	9	3.3	6.6	0.5	1.9	74.0758
O15525	-0.645062	35.8	2.43	2.20697	162	2	-0.62	1	0	10.5	0.6	1.9	9.9	0.6	5.6	0.6	1.9	10.5	11.1	1.9	3.7	4.3	4.9	8.6	6.8	7.4	8	0	1.2	84.321
O15528	-0.178937	6.69	0.003	0.219409	508	0	0.08	0	9.64567	9.8	1.8	2.6	6.9	4.1	7.3	3.1	2	2	13	1.4	1.8	8.1	3.9	9.6	6.1	5.3	7.3	1.8	2.2	89.311
O15529	0.422832	17.63	0.04	-4.42302	346	0	0.2	0	15.0289	6.6	3.5	2.6	4.3	6.4	7.8	2.6	3.5	1.7	15	1.4	2.6	4.3	3.8	5.5	7.8	4.3	9.8	2.6	3.8	107.283
O15530	-0.506475	26.26	5.1	0.53895	556	50	2.76	0	0	5.9	1.6	5	7.4	4.9	6.1	2.7	4.5	6.8	10.1	1.8	3.2	6.8	5	5.4	7.9	4.7	4.9	1.1	4.1	76.8345
O15533	-0.0330357	16.29	429	-0.225682	448	4	1.49	0	37.9464	12.3	1.3	2.9	5.4	2.7	9.2	2.9	1.1	2.9	14.5	1.6	0.7	11.2	4	4.9	8	4.2	5.8	2.5	2	90.0446
O15534	-0.528527	70.85	1.48	1.71726	1290	41	5.34	1	33.4109	8.8	2.1	4.6	6.2	2.4	8.8	2.4	2	2.9	8.8	1.3	1.7	11.6	4.9	6	13	5.3	4.7	0.5	1.9	64.876
O15537	-0.367411	5.8	0.838	0.437188	224	5	0.68	0	0	4.5	4.5	5.4	6.2	3.1	7.6	0.9	6.7	4.9	9.8	1.3	4	4.5	5.4	5.4	8.5	5.4	3.6	4	4.5	79.2411
O15539	-0.544751	11.05	0.21	1.95066	181	5	-1.23	0	13.2597	7.2	1.7	5.5	10.5	5	2.2	1.7	6.6	13.3	11	2.8	3.3	5	4.4	2.8	7.7	2.8	2.8	1.1	2.8	84.1436
O15541	-0.999125	50.15	6	2.87095	343	27	0.89	0	0	6.1	3.8	7.6	10.5	3.5	8.2	2	3.8	8.5	3.8	1.7	2.6	6.1	4.4	7	6.1	4.7	5	0.6	4.1	50.0583
O15547	-0.153061	16.78	0.005	-1.43226	441	3	1	0	3.62812	7.9	3.2	3.9	5	5.2	9.1	2.5	2.5	4.5	9.5	0.7	2.7	6.1	4.5	4.5	5.9	7.9	7.7	3.6	2.9	77.1655
O15550	-0.459101	41.68	1.03	-0.430038	1401	21	2.2	1	6.49536	7.7	2.4	3.5	5.3	2.6	6.3	3.6	3.6	5.3	10.1	1.7	6.5	6.1	6.1	3.4	10	6.1	5.1	1.7	2.9	75.7816
O15551	0.605	14.55	4.16	-2.41498	220	11	-0.14	0	13.1818	13.2	4.1	3.2	2.3	1.8	8.6	0	5.5	3.6	13.2	2.7	2.7	4.1	4.5	3.2	5.5	6.4	9.5	2.7	3.2	113.545
O15552	0.49	11.52	1.39	-4.45113	330	2	-0.18	0	15.1515	6.7	2.1	2.4	3	6.1	6.7	1.2	6.1	1.8	15.2	1.8	3.3	4.8	3.6	7	7.9	4.5	9.4	2.4	3.9	116.636
O15553	-0.64507	31.5	0.087	1.46772	781	12	3.33	0	0	7	2.2	4	8.7	2.7	7.8	2.4	4	6.3	9.1	1.2	2.4	7.7	5.9	7	8.6	4.6	5.2	0.8	2.4	73.201
O15554	0.223653	4.45	0.638	-2.44292	427	6	-0.54	0	17.096	9.1	2.1	2.6	4	3	7.5	3.3	3.5	4.7	17.1	3.5	2.3	3.5	4.7	6.8	4.9	5.2	7.7	2.6	1.9	111.92
O43143	-0.513585	16.98	223	0.98039	795	29	1.33	1	0	6.7	1.8	7	6.7	3	4.8	3.1	5.4	5.9	9.3	3	3.1	5.4	4.5	7.7	5.8	6	6.2	0.6	3.9	81.9371
O43147	-0.412724	36.28	0.017	-0.059403	1006	8	1.8	0	4.37376	7.6	2.5	5.4	7.7	3.2	6.2	4.4	3.8	5.1	10.2	2.1	2.3	5.6	5.2	6.2	8.2	3.3	6.9	1.6	3	82.1074
O43148	-0.788025	30.04	29.7	1.74752	476	16	-0.31	1	22.479	5	2.5	5.9	10.9	4.8	4.8	0.8	3.8	11.6	7.8	2.5	5.3	2.9	3.8	4.8	8.4	4.2	5.5	0.6	4	65.9454
O43149	-0.236069	35.93	6.66	-2.30891	2961	46	1.62	0	12.3945	7.7	2.9	5.6	7.4	3.9	5.3	2.9	3.6	5.6	12.4	2.3	2.7	4.6	5.2	4.8	8.4	5.1	6.2	1.4	2.2	88.1189
O43150	-0.579423	36.48	12.1	1.72832	1006	25	2.54	0	0	7.6	2.2	6.1	7.4	2.8	5.4	2.7	4.8	7.9	9.8	1.7	5	7	5	4.5	7.4	5.6	4.9	0.8	1.9	78.668
O43151	-0.603064	72.47	0.041	1.92806	1660	28	4.51	1	20.6627	9	1.9	3.3	7.7	3	8.1	2.5	2.5	6	8.6	1	2.6	11.7	4.7	4.8	9.9	4.6	4.4	1.4	2.3	64.9025
O43155	-0.193485	21.52	0.192	-1.31388	660	11	0.53	0	7.12121	3.9	2.3	3.9	4.5	3.5	5.3	3.3	5.5	3.9	12.7	2	7.1	6.2	4.1	4.8	8.9	7.1	6.5	1.5	2.7	93.7424
O43156	0.00725436	18.37	5.38	-1.76042	1089	14	0.28	0	16.1616	6.9	2.4	5.1	6.8	3.4	4.1	2.9	4.2	5.4	16.2	1.8	3.1	4.6	6.5	3.9	7	4.6	8	0.8	2.3	109.559
O43157	-0.210679	22.9	1.56	-1.41083	2135	15	2.46	0	16.9555	8.2	2.7	5.3	6.2	2.8	7.7	2.4	2.6	2.3	11.1	1.5	2	8.9	4.8	6.1	7.4	6	8.1	1.2	2.8	84.7166
O43159	-0.755044	50.22	6.69	2.70427	456	24	0.11	1	0	9.4	2.9	5.3	6.8	3.9	5	2	1.5	9	8.6	0.9	2.6	8.6	6.1	7.9	8.6	3.3	5.9	0.9	0.9	65.943
O43164	-0.863418	61.02	0.844	2.8859	708	49	2.65	0	32.0621	6.4	2.5	7.5	12.7	2.7	6.2	3.1	2.8	3	6.4	1.3	4.4	6.2	5.5	3.8	11.9	4.7	5.4	1.1	2.5	57.726
O43166	-0.67184	65.63	1.97	1.60933	1804	178	2.68	0	14.4124	5.7	1.2	5.4	6.7	3.6	5.8	2.6	3.8	6.1	7.6	2.3	4.1	6.2	3.6	6.5	14.4	5.7	5.2	0.7	2.8	65.1386
O43167	-0.749211	22.09	0.185	1.59028	697	15	0.79	1	5.59541	5.6	2.9	3.6	8.5	3.3	5.5	5.6	4.2	7.6	8	1.9	3.7	5.2	7.2	4.4	9.5	6.6	4.6	0.1	2.2	66.4706
O43169	-0.488	22.6	288	0.700225	146	12	0.2	0	0	6.2	1.4	6.2	10.3	2.1	8.2	2.7	4.1	6.2	8.9	1.4	2.1	3.4	2.1	4.1	11.6	4.1	6.8	2.1	6.2	74.7333
O43172	-0.493678	12.84	43.7	1.37644	522	7	0.37	0	0	7.3	2.3	5.6	7.5	2.7	8	3.8	5.2	6.5	9.2	1.7	3.6	3.8	2.7	6.3	7.7	5.9	5.2	2.5	2.5	78.3142
O43173	-0.215263	14.47	0.004	-1.09998	380	4	0.65	0	7.36842	5	1.6	3.4	3.7	7.4	4.7	3.9	5.3	6.8	11.1	2.6	5.8	4.5	4.5	4.7	7.6	6.3	5.3	1.6	4.2	83.8947
O43174	-0.0810865	8.25	0.175	-0.135766	497	5	0.51	0	0	5.8	2.8	3.4	6.8	5.2	7.6	2.8	5.2	5.4	13.5	2.8	2.8	5.4	3.6	7	5.8	4.4	5.6	1.2	2.4	95.1509
O43175	0.0932458	0.75	209	0.035721	533	20	0.36	0	0	10.1	2.4	3.8	5.8	2.8	9.4	1.5	4.5	4.9	12.2	2.4	3.6	4.9	5.1	4.1	6	6.6	8.3	1.1	0.6	99.1932
O43181	-0.642857	26.29	45.9	1.08389	175	5	-0.79	0	0	7.4	0	4.6	5.7	2.9	2.9	0.6	2.9	8	6.3	3.4	5.1	4	3.4	9.1	9.1	10.3	9.1	4	1.1	69.6
O43182	-0.63501	65.4	9.38	2.03546	974	39	3.19	0	13.655	7.8	1.3	5.9	6.2	2.6	7.1	1.7	2.7	5.1	10.6	1.3	2.7	8	5.7	6.8	13.7	4	4.1	1.3	1.4	71.3655
O43184	-0.358746	25.63	2.71	0.099839	909	4	3.29	0	5.50055	7.3	5.5	4.5	4.5	2.9	8.4	3.4	3.6	5.3	9.1	2	4.7	7.6	4.4	6.4	6.3	5	6.2	0.9	2.2	74.8955
O43186	-0.551505	76.92	0.189	1.2642	299	2	2.38	1	26.7559	10	1	3.7	3.3	2.7	6.4	0.7	1.3	4.3	7.7	2.3	1.7	13.4	7	5	13.4	5	4.7	1.3	5	58.8294
O43187	-0.27968	32.64	0.092	0.660491	625	7	1.38	0	0	8	3.2	5.3	7.4	2.9	5.4	1.8	4.3	4.5	11	2.2	3	6.7	4.5	6.1	9.3	4.5	5.9	1.9	2.1	85.072
O43189	-0.506878	39.51	1.29	1.24727	567	14	3.24	1	29.2769	6	4.1	4.2	5.1	3	10.1	2.3	1.8	4.2	10.1	1.2	1.4	10.2	3.9	9	10.6	3	5.5	1.9	2.5	67.9365
O43193	0.290534	22.09	0.015	-2.81748	412	10	0.8	0	9.46602	9	2.4	2.4	3.4	4.1	8	1	4.1	1.2	14.1	2.2	2.2	8.3	1.2	9.5	7.8	5.1	8.3	2.2	3.6	103.908
O43194	0.130022	29.36	2.7	-3.79364	453	8	-0.63	0	0	6.6	2.6	1.3	4.9	5.7	3.3	3.3	5.5	3.5	11.5	3.1	2.9	4.6	4.9	6.2	11.5	6.4	7.7	1.5	2.9	95.3201
O43196	-0.0185851	8.15	2.81	-0.860533	834	7	0.7	1	14.2686	6.8	1.8	5.5	6.5	4.4	6	2.5	5.5	4.9	14.3	2.3	3.2	5.4	4	5.5	7.7	4.2	6.7	0.6	2.2	103.465
O43236	-0.785565	36.61	3.04	1.92319	478	6	1.65	0	8.159	4.6	1.7	8.2	8.6	4.4	5.4	2.5	4.4	6.7	7.5	2.1	3.6	7.1	4.6	7.9	5.2	5.2	6.5	1	2.7	69.9163
O43237	-0.495732	34.15	27.9	1.50136	492	36	2	0	0	6.7	1	5.7	8.3	3	7.5	2.6	3	8.1	9.8	2	3.3	6.3	3.3	4.3	8.7	5.5	7.5	1	2.2	78.4553
O43240	-0.130797	11.96	1.1	-0.090606	276	0	0.96	0	0	9.4	4.3	4.3	2.5	1.1	8.3	3.3	2.9	3.3	12.7	1.8	2.9	7.2	6.2	6.5	6.5	4.3	6.9	2.5	2.9	90.1449
O43242	-0.529213	21.35	216	1.16883	534	19	0.28	0	0	9.6	0.4	5.8	7.9	4.1	4.3	2.4	4.1	6.6	10.9	2.6	3.2	4.9	5.6	7.7	5.8	4.9	5.2	0.2	3.9	83.1835
O43246	0.649921	14.02	0.261	-6.13914	635	1	0.68	0	26.7717	11.2	1.3	2.4	3	5.7	8.3	2.5	4.9	1.3	15.6	2.5	1.7	5.7	3.3	3.6	9	4.7	8.2	1.9	3.3	114.772
O43247	-1.005	57.5	0.099	2.5405	280	4	1.81	0	0	7.1	0.7	5.7	6.4	2.1	8.2	2.5	2.5	7.1	7.5	1.8	5.4	6.1	6.8	5.4	12.9	5	2.9	1.4	2.5	54.4286
O43248	-0.761513	51.97	0.228	1.98041	304	7	1.64	1	0	9.2	2.6	2.3	8.2	4.9	6.9	2.6	1.6	5.6	6.2	2	5.6	9.2	3	6.9	11.5	2.6	3.6	0.7	4.6	50.4934
O43251	-0.41359	53.33	6.29	0.88284	390	7	3.53	1	30.5128	13.1	0	3.8	3.8	4.1	11	2.1	2.8	2.3	4.9	1.3	4.1	8.7	5.1	5.1	6.7	8.2	6.2	0.3	6.4	60.9231
O43252	-0.413301	1.28	23.6	0.223631	624	8	0.68	0	0	7.4	2.2	5.6	7.7	3.5	7.4	3.2	3.4	6.2	9.5	3.2	4	5.3	4	6.1	2.9	5.3	7.9	1.8	3.5	80.1442
O43255	-0.0648148	20.99	0.259	-0.544191	324	12	1.84	0	5.8642	10.8	5.9	2.8	4.6	3.4	7.4	4.6	4.6	3.4	8	2.5	3.4	9	4.6	3.4	7.7	5.9	5.2	0.9	1.9	75.3704
O43257	-0.887662	23.38	0.902	1.77458	154	1	0.74	0	0	7.1	5.2	6.5	4.5	4.5	6.5	1.9	0.6	7.1	8.4	0.6	3.9	7.1	7.1	11	3.9	5.8	5.2	0.6	1.9	57.6623
O43264	-0.262644	5.65	20.3	0.318346	779	17	-0.8	1	13.4788	5.8	1.9	4.4	9.1	3.3	3.1	2.6	5.6	7.4	13.5	2.8	3.9	4	5.3	4.2	8.2	5.5	5.9	0.8	2.7	97.4968
O43272	-0.297667	8.33	1.43	0.723829	600	2	0.4	0	10.8333	10.8	1.7	4.2	8	4	6	2.5	2.5	4	12	3.3	2.5	4.5	4.8	8.5	5.2	4.5	6	1.2	3.8	84.7833
O43278	-0.335728	15.5	4.34	-0.790104	529	6	2.14	0	5.86011	6.8	5.9	5.1	6	4.5	8.3	2.3	3.2	3.4	7.9	0.8	4.3	7.2	4.2	6.2	5.7	7	6.6	1.3	3.2	69.4896
O43280	-0.378731	8.58	0.469	0.109772	583	7	0.38	0	17.4957	6.5	1.2	5.1	6.7	3.9	7.2	1.9	2.4	5.1	14.2	2.1	3.9	6	6	4.5	6.2	4.5	4.6	3.3	4.6	84.837
O43281	-0.400178	61.32	0.895	1.90695	561	13	2.28	0	29.0553	12.3	1.4	5	6.2	1.1	8.4	2	1.6	2	10.7	1.2	1.2	16.8	4.8	5.5	7.1	3.6	5.5	0.4	3.2	76.2923
O43283	-0.745652	61.59	0.058	2.18417	966	9	1.79	0	11.5942	5.7	2.2	5.2	8.7	2.6	5.8	3.9	4.2	5.8	8.2	2.2	3.4	6.4	5.1	6	11.6	5.1	4.3	1.3	2.3	66.7495
O43286	-0.342784	8.76	0.268	-0.730384	388	6	1.17	0	0	5.2	1	5.7	4.6	6.7	6.7	3.4	4.4	3.9	11.1	3.1	5.7	5.4	4.4	7	5.2	4.4	5.4	1.5	5.4	81.1598
O43290	-1.08425	81.5	39.4	4.92974	800	58	1.9	1	32.25	6.9	0.4	6.2	13.6	1.8	8	1.2	2.8	9.5	9.2	1.5	2.2	3.9	4.9	9.1	6.9	4.9	4.9	0.5	1.6	67.8125
O43291	-0.246032	9.52	2.95	-0.243348	252	1	3.02	0	0	7.9	5.2	4.8	5.2	4	6.7	0.8	1.6	3.2	10.3	2.4	6.3	3.2	2.8	9.1	9.1	4	7.9	1.6	4	77.381
O43292	0.396135	7.89	3.51	-3.41291	621	3	0.21	0	30.5958	11.3	1	2.4	4.3	4.2	8.4	2.7	1.8	2.1	19.3	2.4	2.1	5.5	4.5	5	5.8	5	7.4	1.9	2.9	115.024
O43293	-0.620925	4.41	1.89	2.28198	454	17	-0.24	0	22.0264	7	0.7	4.6	12.6	4.4	5.5	2.2	6.2	7	11	1.3	3.5	2.6	3.5	9.5	6.4	4	4.6	0.7	2.6	87.467
O43294	-0.436876	44.9	32.3	1.13152	461	31	2.37	0	16.269	6.5	5.9	4.1	6.1	6.1	9.5	3.7	1.3	3.7	8.9	1.3	1.7	10.4	3.9	5.9	10.4	5.4	3.3	0.7	1.3	55.705
O43295	-0.633394	48.04	1.81	1.51135	1099	31	2.64	0	0	6.2	1.5	5.8	8.5	3.4	4.5	3.4	5	6.4	8.7	3.1	3.5	5.6	5.1	6.6	9.7	4.6	5.2	0.3	2.8	74.8135
O43296	-0.711324	14.35	0.281	1.11965	627	28	0.85	1	11.9617	3.8	5.7	3	9.6	4.3	8.3	6.2	3.3	7.5	6.5	1.6	2.7	4.8	4.8	5.1	7.8	6.9	4.9	0.6	2.4	56.7305
O43298	-0.671092	50.75	0.488	1.54876	467	9	-0.08	1	5.56745	5.8	2.6	4.9	10.1	4.1	6.4	5.6	3.4	5.4	6.4	3.2	3.6	3.9	5.1	4.3	10.1	5.4	6	0.6	3.2	61.5846
O43299	0.0763321	13.14	0.634	-1.04433	807	5	1.48	1	27.2615	10.3	2.5	4.3	5.6	4.2	4.7	2.4	1.7	2.1	17	1.4	1.4	5.9	5.5	7.3	9.3	5.5	6.8	0.9	1.4	103.024
O43300	-0.139147	18.6	0.027	-1.35902	516	9	0.04	0	14.5349	4.3	3.1	3.7	5	5.4	5	4.1	5.8	4.5	14.5	2.7	5.4	4.1	4.5	5	8.1	7.6	2.9	1.9	2.3	92.0543
O43301	-0.255852	13.04	5.57	-0.115484	675	9	0.37	0	0	8.1	0.7	6.1	6.2	5	7.3	2.1	5.8	6.8	8.6	1.6	2.7	4.9	4.1	4.7	7.3	6.2	7.1	1.2	3.4	84.8148
O43303	-0.618972	78.75	0.679	1.85642	1012	32	2.78	0	13.834	6.3	1.4	4.2	8.1	2.9	4	2.1	4.3	8.3	8.9	3.4	5.5	5.1	6.2	5.3	10.6	5	6.4	0.4	1.5	76.5909
O43304	-0.372701	16.52	0.036	0.397172	696	7	0.46	0	0	5.5	2	4.5	8.3	2.9	6.9	3.7	3.9	3.4	11.2	1.9	2.4	5.7	4.5	7.5	8.5	4.2	7.6	2.3	3.2	86.3793
O43306	0.0286815	15.67	0.426	-3.97862	1168	11	1.77	0	9.41781	9.4	2.7	4.3	5.4	4.7	6.7	2.6	5	3.7	12.1	3.2	3.6	3.7	4.3	7	6.1	4.6	6.9	1.1	3.1	95.976
O43307	-0.640698	16.09	0.538	1.26961	516	4	2.34	0	8.33333	5.2	1.9	8.3	7.9	5	4.3	2.5	6.2	6.8	8.1	3.1	4.7	3.9	6.6	6.6	4.8	2.3	5.6	2.3	3.7	77.4612
O43309	-1.03212	20.86	0.157	2.16618	604	8	0.69	1	31.1258	3.5	5	3.5	12.4	3.1	6	6	4.1	7.3	6.8	1.2	2.6	4	7.8	6.5	7	6	3.5	1	3	56.1755
O43310	-0.840301	39.46	1.7	2.20569	598	17	2.56	0	0	5.5	1.7	5.9	8.7	2.8	6.2	3.3	3.5	5.7	9.2	3	3.8	6	6	7.2	8.7	6.5	3.5	1.2	1.5	65.2676
O43312	-0.687285	70.6	3.96	2.42856	755	36	2.93	0	23.0464	7	1.3	5.3	6.6	2.1	6.1	2	4.2	5.4	7	2.5	2.1	9.7	5.6	6	13.4	6.4	4.4	0.8	2.1	63.6026
O43313	-0.363791	42.77	0.539	0.754814	823	2	1.32	0	21.0207	7.9	2.3	5	5.6	3.9	5.3	2.2	4.3	4.1	8.6	2.2	4.9	7.5	6.2	2.8	12.4	8.6	4.7	0.5	1	71.8712
O43314	-0.569268	41.51	5.49	1.25762	1243	57	1.7	0	7.72325	5.1	1.8	5.4	7.7	3.1	5.6	2.8	5.2	7.7	8.8	2.2	3.9	6	3.2	6.2	9.4	5.1	6.1	0.6	3.8	77.7876
O43315	0.687119	9.15	0.292	-3.45117	295	2	0.42	0	20	11.2	1.4	2	4.4	7.1	11.5	1.4	8.5	3.7	10.8	3.1	3.1	4.7	2	3.1	6.1	3.1	8.8	1.4	2.7	112.102
O43318	-0.536799	44.39	5.55	1.00487	606	36	2.12	0	0	7.1	2.1	4.1	7.4	2	5.6	2.1	5.1	6.3	7.4	3.5	4	5.9	5.9	5	11.1	5.9	5.4	1.3	2.6	71.7987
O43323	-0.129293	10.35	0.004	0.402619	396	0	-0.62	0	23.2323	12.6	1.5	5.1	5.3	3	8.8	3	1	2	13.6	1.3	2.8	6.8	1.8	10.6	4	3.3	8.6	2.3	2.5	94.6465
O43324	-0.294828	1.15	75.7	-0.148231	174	2	-2.04	0	0	6.3	0.6	3.4	5.7	2.3	5.7	4.6	5.2	6.9	14.4	0.6	5.7	1.7	5.7	3.4	7.5	6.3	6.3	1.1	6.3	100.862
O43345	-0.837656	7.19	0.04	0.912604	1280	15	-0.65	1	46.0156	4.4	6.5	0.7	10.9	4.5	6.7	6.8	5	17	4.5	1.1	2.3	3.4	1	1.6	7.6	7	2.8	1.5	4.9	49.7031
O43347	-0.283425	46.69	3.74	0.811458	362	7	2.17	1	0	9.1	1.1	4.1	5.2	6.1	10.5	2.2	2.8	4.7	5.5	4.4	1.7	8.6	3.6	5	6.9	8.3	6.4	0.6	3.3	59.8619
O43353	-0.420741	29.07	2.47	0.73241	540	26	1.69	0	0	5.4	1.9	4.6	7	2.4	4.1	4.1	6.9	5.7	11.1	2.6	4.4	6.5	5	5.2	10	4.4	4.6	1.3	2.8	88.8519
O43361	-0.858226	12.6	0.115	1.24932	778	8	0.29	1	21.5938	3.3	5.4	3.3	8	5.3	6.7	7.5	4.2	8.7	6.7	0.9	3	3.2	6.4	6.6	7.3	5.7	3.9	0.5	3.5	57.1337
O43365	-0.776749	91.42	4.22	1.87488	443	6	4.43	1	27.991	11.1	1.1	1.8	3.4	1.8	9.9	4.1	1.4	4.3	6.3	1.8	3.8	16.9	6.1	3.4	11.1	4.5	2	0.5	4.7	46.8849
O43374	-0.359153	13.7	0.334	0.562329	803	5	0.37	0	0	6.8	2.2	5	7.7	3.7	5.9	2.7	3.1	5.9	12.1	1.5	2.5	5.4	4.6	7.2	7.5	5.4	7.3	1.6	1.9	87.4097
O43379	-0.354941	50	1.47	-0.27187	1518	78	1.59	0	10.6719	7.4	2.5	5.3	6.7	3.1	6.5	3.6	3.5	3.8	9.8	1.3	2.8	7.7	4.5	4.9	10.7	5.5	6.8	1.3	2.3	78.9526
O43390	-0.932859	31.91	198	2.532	633	36	10.17	1	18.4834	6.3	0.8	6.2	8.1	2.8	12.2	1.4	3	7	5.7	1.6	3.8	6.6	5.5	7.7	4.4	3.5	6.3	0.8	6.3	58.5308
O43395	-0.806589	35.43	26.5	2.92671	683	24	0.47	1	11.5666	7.6	0.4	4.8	10	3.1	4.7	2.2	4.7	11.6	8.1	2.3	3.2	6.1	5.3	6.7	5.7	5.6	6.1	0.9	0.9	75.1245
O43396	-0.45917	7.27	112	0.879767	289	10	0.61	0	0	5.2	2.4	6.9	7.6	6.6	7.3	1.4	4.8	6.2	6.2	2.8	5.9	5.9	5.5	3.8	5.9	5.9	7.3	0	2.4	69.4464
O43402	-0.331905	4.29	18.9	0.405539	210	2	-0.58	0	6.66667	9	3.8	7.6	5.7	2.4	4.3	6.7	4.3	5.2	9.5	2.4	4.3	5.7	2.4	4.3	4.3	5.2	7.1	1.9	3.8	83.619
O43405	-0.0254545	5.45	1.79	-1.00993	550	6	1.13	0	15.4545	8.4	2	5.1	4.7	6.4	9.3	1.6	6.5	6.4	5.8	1.8	4.4	4.5	3.1	4	8	5.8	9.1	0.9	2.2	82.9455
O43414	-0.0525223	24.33	5.31	-0.174238	337	1	1.19	1	0	8	2.7	3.9	3.9	5.3	8.9	3	4.7	4.7	9.8	3.9	2.1	8.9	4.7	3.9	6.8	4.5	5	3	2.4	79.3472
O43422	-0.380552	10.12	0.716	0.055388	761	17	1.06	1	0	5.3	2.6	5.3	9.6	4.9	3.3	3.3	5.8	6.3	11.4	2	5.5	3.7	3.7	5.4	7.1	5.8	5.7	1.1	2.5	88.7779
O43424	-0.193446	14.6	0.061	-2.33428	1007	7	1.84	0	12.2145	5.5	1.5	6	5.3	4.6	7	1.9	6.7	4.2	9.4	2.7	5.6	4.1	4.1	5.5	7.4	6.8	7	2	3.2	88.3615
O43426	-0.406675	44.37	1.58	0.183695	1573	58	3.36	1	19.0083	7	1.3	5.1	5.9	4.9	6.2	1.7	4.1	5.5	9.3	1.7	3.9	8.4	4.8	5.5	10.6	5.5	5.8	1.2	1.7	76.2683
O43427	-0.218407	2.47	8.82	0.658777	364	3	0.79	0	9.61538	6.6	1.4	9.6	4.9	6.3	4.9	3	3	6.3	14	2.7	3	2.2	3.8	6.6	5.5	4.9	7.1	1.1	2.7	93.7363
O43432	-0.612808	74.07	16.3	2.27537	1585	39	3.34	1	18.4227	6.4	1.3	5.7	9.5	3.2	4.6	1.3	5.3	7.3	8.5	2.1	3.2	8.9	5.4	5.3	8.4	5.9	5.7	0.8	1.3	76.9085
O43439	-0.682616	66.56	0.852	2.00432	604	25	2.27	0	0	7.8	2.3	3.1	8.3	2.5	5.3	3.6	3.3	4.6	8.6	1.8	4.8	8.6	5	7.5	8.9	6.3	5.1	1.2	1.3	69.1556
O43447	-0.0570621	4.52	129	0.312686	177	4	1.01	0	0	4.5	2.8	5.6	4	7.9	11.9	1.7	6.2	6.8	4.5	3.4	5.6	6.2	2.8	4	6.2	4	10.2	0.6	1.1	75.8757
O43448	-0.282178	23.02	0.267	0.175305	404	4	2.91	0	12.3762	7.9	2.2	3	6.4	1.5	12.4	2.2	4.5	5	9.9	2.2	2.7	5.2	5	6.2	7.2	5	6.7	2	3	83.2921
O43451	-0.315617	5.55	2.5	-3.27123	1857	17	2.49	1	25.3635	5.2	1.2	6.1	4.8	5	7.1	2.3	4.9	3.4	8.7	2	5.9	6.4	3.8	4.6	7.2	7.1	6.9	2.5	4.8	78.2929
O43462	0.428516	15.22	0.355	-5.29639	519	9	-0.27	0	16.5703	5.6	2.3	3.7	2.5	6.6	6	2.9	6.7	2.7	11.9	1.7	4.2	4.2	3.7	3.5	11.2	5.6	10	1.7	3.3	107.534
O43463	-0.595388	6.07	1.41	0.994271	412	4	0.59	1	20.3883	5.1	5.1	6.3	7.3	3.4	6.6	1.9	4.4	5.3	9	1.2	4.9	3.9	4.1	9.7	4.9	3.6	6.3	1.5	5.6	75.4612
O43464	-0.0556769	24.89	27.9	0.408484	458	15	0.85	0	19.214	10.7	0.2	4.1	4.6	2	9.8	1.3	5	1.3	9.8	1.3	2.4	7.4	3.5	9.6	7.2	7	9.6	1.3	1.7	96.4629
O43482	0.0100437	31.88	1.4	0.30242	229	6	1.1	0	0	10	3.9	3.5	5.7	3.5	7	3.1	3.5	4.8	11.4	2.2	3.1	6.1	3.9	4.4	9.2	4.8	7.4	1.3	1.3	89.476
O43488	-0.277716	12.53	120	0.941117	359	9	-0.14	0	11.9777	12	2.2	3.3	7	3.6	8.1	3.9	1.7	3.6	10.6	2.5	2.8	5.8	4.2	6.1	6.4	4.7	5.8	1.9	3.6	76.7409
O43490	-0.0150289	6.94	2.65	-3.84978	865	12	-0.19	0	30.9827	4.6	2.5	4.7	4.9	4.3	6.1	2	7.4	5.3	12.9	1.6	6.2	3.8	3.9	4.2	7.9	6	6.4	0.8	4.4	102.416
O43491	-0.815224	69.55	75.9	2.7736	1005	77	0.34	1	21.8905	5.9	0.9	4.8	13	2.2	5.8	2.4	4.7	8.9	7.1	1.2	2.1	5.6	5.8	5.3	8.3	6.7	7.3	0.6	1.8	72.7264
O43493	-1.21648	79.96	10.1	2.47447	479	43	1.31	0	24.4259	8.1	0	6.3	9.4	1.9	7.1	1.9	2.1	10.6	5.2	0.4	3.5	9	4.8	2.7	13.8	6.7	4.8	0.4	1.3	43.6156
O43497	-0.127934	51.33	0.205	-4.40017	2377	17	3.31	0	21.9184	6.9	2.3	5	5.8	4.5	7	2.7	4.8	3.2	11.7	2.6	2.9	7.2	3.5	6.4	10.2	4	5.8	1.3	2.1	88.2162
O43502	-0.125798	8.24	0.748	0.181398	376	1	-0.38	1	0	7.2	2.7	5.1	7.7	4.5	5.9	2.9	5.6	5.3	12.8	1.9	1.9	3.5	5.3	6.4	6.1	6.9	6.4	0.5	1.6	97.2606
O43505	-0.224337	6.27	7.53	-0.401231	415	3	-0.21	0	0	9.4	1.9	3.9	6.7	4.6	5.8	2.2	1.7	3.4	12.5	2.7	4.3	6.5	5.5	7	5.3	2.7	7.7	1.4	4.8	87.2048
O43506	-0.127135	15.01	4.43	-2.50201	726	5	1.29	0	6.19835	4.1	6.2	5.1	4.8	4.4	7.6	4	5.4	4.7	9	2.1	5.2	4.8	5.4	3.2	5.6	5.2	7.7	1.8	3.7	82.3691
O43508	-0.182731	44.18	0.292	0.621762	249	3	-0.79	0	0	12	1.6	3.2	6.4	2.8	8.4	2	2	2	15.3	0.4	1.6	6.4	5.2	10.4	7.2	3.2	6	0.8	2.8	96.8675
O43511	0.365256	16.92	0.234	-4.21143	780	7	0.55	0	18.9744	7.6	1.5	4.4	5.1	5.1	6.4	0.8	9.2	5.1	11.2	1.5	3.6	4.1	4	3.8	7.3	5.6	9.7	0.8	3.1	115.321
O43513	-0.736052	21.03	4.48	1.88145	233	2	1.05	0	0	3.9	1.7	6.9	10.3	2.6	3.4	4.3	7.3	5.6	10.7	5.2	4.7	7.7	6.9	7.3	4.3	2.1	3.4	0	1.7	84.1202
O43516	-1.01431	88.87	43.3	3.67842	503	25	7.4	0	53.6779	4.4	0.2	3.2	2.4	2.4	12.9	0.8	1.8	3.2	5.6	0.6	3.8	28.2	2.4	8.3	12.5	4	2.6	0.2	0.6	40.5567
O43520	-0.240687	15.67	0.409	-3.55517	1251	20	1.1	0	17.0264	7.2	1.7	6	6.2	6	5.2	1.8	6.7	6.2	9.4	2.1	4.7	2.8	4.3	5.8	5.5	6.6	5.9	1.5	4.3	87.3221
O43521	-0.713131	60.1	1.51	1.78343	198	15	3.61	0	0	8.6	2	4.5	5.6	4	6.1	2.5	3	1	7.1	4	3	12.1	6.1	10.1	10.6	3	2.5	1	3	55.303
O43524	-0.593611	81.58	11.7	2.38618	673	46	2.02	1	16.3447	7.4	0.7	6.4	4.2	2.1	8.8	1.3	2.1	3.1	9.5	3.9	4.9	7.7	5.8	4.6	16.3	5.3	3.3	1.3	1.2	62.11
O43525	-0.36055	55.16	2.56	-0.346303	872	14	2.25	0	0	8	0.9	5.5	6	4.4	8.8	1.4	4.7	5.8	9.6	2.2	2.3	6.3	3.7	7	7.3	5.8	5.3	1.6	3.3	79.2317
O43526	-0.357339	52.64	0.277	-0.556148	872	22	2.31	0	0	7.8	2.3	4.5	5.3	4.1	8.7	1.7	4.4	5.6	8.3	1.6	2.1	7.9	3.6	7.5	9.9	4	6.2	1.5	3.2	74.9541
O43529	-0.294101	14.89	0.422	-0.702273	356	2	-1.13	0	7.58427	3.7	1.7	5.9	7.3	7.6	3.9	4.5	7.3	7.3	9.8	1.7	3.1	6.2	2.8	6.5	3.9	4.5	6.7	1.7	3.9	90.0281
O43541	-0.496976	39.72	1.26	1.6539	496	5	2.97	1	31.8548	8.5	3	5.2	6.5	2.8	11.7	1.4	1.8	2.4	9.9	0.6	1.6	9.9	2.4	10.3	9.1	3.2	5.4	1.6	2.6	69.8589
O43542	-0.0592486	3.18	0.64	0.65072	346	5	-0.84	1	16.185	9.8	2.3	4	5.5	2.9	6.6	3.5	3.5	3.5	16.2	1.2	1.4	6.1	6.4	7.5	7.5	4.6	6.1	0.9	0.6	104.075
O43543	-0.144643	6.43	0.137	-0.060332	280	6	0.07	1	0	3.6	4.3	5	8.2	5.7	4.6	3.9	4.6	4.6	13.9	2.1	2.1	2.5	3.6	5.4	12.9	4.3	4.6	0.7	3.2	89.4643
O43548	-0.271667	5	0.118	-1.5326	720	6	0.43	0	0	5.7	2.4	5.8	4.6	4.2	6.1	1.9	5.6	5.1	9.6	1.7	5.4	5.4	6	4.2	8.6	5.1	7.1	2.1	3.5	85.2778
O43557	0.0129167	19.17	0.087	-0.243786	240	4	-0.32	0	12.0833	5.8	1.2	2.9	5.4	2.9	12.1	2.9	1.7	1.7	14.6	1.7	0.8	4.2	4.2	8.3	8.8	5	10	2.5	3.3	98.2083
O43559	-0.791667	71.34	0.046	2.30649	492	7	2.93	0	11.3821	5.9	2.6	5.3	6.1	3.3	8.1	3.7	1.8	2.4	8.9	1.4	4.9	11.4	5.1	8.5	8.1	4.9	4.5	1.2	1.8	60.874
O43566	-0.436042	46.47	1.44	1.90882	566	32	2.23	0	0	7.4	1.6	3.9	7.8	3	8	1.2	2.5	5.5	13.3	0.9	1.9	8.7	5.8	6.9	10.4	4.2	5.3	0.5	1.2	84.1166
O43567	-0.241995	30.71	0.791	-0.204397	381	4	0.44	0	8.39895	5.5	2.6	8.4	7.1	4.2	4.2	2.4	7.1	6	10.5	1.6	5.2	5.2	3.4	3.9	7.9	4.2	7.1	0.3	3.1	94.6457
O43570	-0.215819	10.17	3.65	-0.636614	354	1	0.29	0	0	6.8	1.4	3.7	5.1	3.7	6.2	4.2	5.1	4.8	11.6	1.7	5.1	6.2	5.1	3.4	9.3	4.8	6.2	1.4	4.2	89.8023
O43572	-0.454834	51.36	0.98	0.676512	662	28	0.3	0	12.0846	7.9	1.2	5.4	6.9	4.7	4.7	3	4.7	6.3	8.8	3	3.3	4.7	5.6	4.2	12.1	5.6	4.5	0.9	2.4	73.429
O43581	-0.492556	29.28	1.03	0.481509	403	7	0.16	0	9.42928	4.5	1.5	6	6	3	6	1.7	5.5	9.4	9.2	2.5	4.5	6.2	3	5.7	8.4	5.5	7.2	1.7	2.7	82.4318
O43583	-0.707576	30.3	101	2.21513	198	10	0.61	0	12.1212	7.6	3.5	8.1	10.1	3.5	7.6	0	6.6	12.1	4.5	1	2	4.5	5.6	4	5.1	4.5	6.1	1	2.5	68.4848
O43586	-0.78101	17.31	1.23	2.08732	416	10	1.2	0	8.17308	8.4	1.9	5.3	10.8	2.6	5	1.4	3.6	6.2	9.1	2.2	2.6	3.6	8.2	7.2	7	5.5	4.3	1.2	3.6	70.649
O43592	-0.018815	1.87	45.5	-2.06416	962	6	0.25	1	25.7796	7.4	2.3	5.2	7.5	5.7	3	2	5.3	5.4	12.9	2.9	3.4	3.6	7.2	4.3	6.4	4.2	7.7	0.8	2.8	100.634
O43593	-0.450715	46.34	0.641	0.78988	1189	8	4.36	1	28.8478	8.7	3.8	3.4	6.5	2.3	11	3.4	1.4	3.4	10.8	0.9	1.4	11.5	5.8	6	7	4.4	4.8	2.5	0.9	70.4542
O43597	-0.667302	50.16	1.08	1.09307	315	34	1.69	0	8.25397	4.1	8.3	4.8	4.4	1.3	6.7	3.2	2.2	5.1	8.3	1	3.5	9.2	5.4	7.9	11.4	5.1	5.1	1	2.2	59.7143
O43598	-0.32931	16.67	163	1.77224	174	14	0.25	0	0	12.1	1.1	5.2	10.3	3.4	10.9	1.1	2.9	0.6	8.6	1.7	0.6	5.2	4	10.9	5.2	3.4	8	1.7	2.9	80.2299
O43602	-0.739178	45.21	1.57	2.08473	365	0	1.7	0	0	6	1.4	7.9	4.1	4.4	5.8	1.6	3	8.8	7.4	2.2	5.2	5.5	3	6.6	12.3	6	5.5	0.3	3	62.5205
O43603	0.531525	28.42	0.186	-3.87858	387	2	-0.4	0	11.8863	11.9	4.1	2.1	1.6	4.4	8.8	2.8	4.7	1.6	14.5	1.6	2.3	5.7	2.1	7	7.2	4.9	7.8	2.1	3.1	108.941
O43609	-0.602194	51.1	0.439	1.08474	319	11	1.01	0	8.15047	4.7	8.2	3.8	5.3	0.9	6.9	3.8	4.4	4.7	8.2	1.6	4.1	7.5	5	7.5	12.2	4.4	3.4	0.3	3.1	63.605
O43610	-0.251042	45.49	0.101	0.359277	288	5	0.04	0	9.375	7.6	9.4	4.5	3.8	2.1	4.9	3.8	3.5	3.5	10.1	1.4	1.4	8.3	6.2	5.2	13.2	5.2	3.1	1	1.7	69.5139
O43613	0.322588	24.24	0.116	-3.96566	425	8	-0.29	0	0	10.1	3.1	2.8	3.5	4.9	4.2	1.9	4.5	3.5	12.2	2.6	2.4	6.4	3.1	6.4	8.7	4	9.4	2.4	4	102.565
O43614	0.216892	27.25	0.333	-4.74658	444	4	-0.51	0	0	6.8	3.6	2.5	4.7	5	3.6	2	7.4	4.3	9.9	2.7	3.8	5	3.4	5.6	7.4	7	8.8	2.9	3.6	99.8649
O43615	-0.558628	26.33	59.8	1.76762	452	13	2.26	0	0	6.9	1.3	6	9.3	3.8	6.4	1.3	4	9.1	10.4	2.7	3.1	3.1	4.4	7.1	7.5	3.8	6.4	1.3	2.2	81.5487
O43617	-0.23	7.22	83.2	1.10054	180	0	-1.06	0	0	6.1	1.7	7.2	8.3	5	6.7	1.1	5.6	5	10.6	3.9	6.1	2.8	2.8	6.1	6.1	5	7.2	0.6	2.2	89.8889
O43623	-0.573134	42.91	0.157	1.03507	268	11	0.67	1	20.5224	5.6	5.2	3.4	4.9	3.7	4.1	6.3	3.7	8.2	8.2	1.5	3	7.5	3.4	4.1	14.2	5.2	3.4	0.7	3.7	61.903
O43633	-0.618018	19.82	178	2.84035	222	13	-1.44	0	7.65766	11.3	0	8.1	9.5	1.4	4.5	0	4.5	8.6	10.8	7.7	4.1	1.4	6.3	8.6	5	3.6	4.5	0	0.5	84.0541
O43638	-0.491818	63.64	0.392	1.51776	330	1	2.81	1	15.1515	8.5	2.7	3	4.2	5.2	10.6	1.8	2.4	3	7.3	2.7	2.1	15.2	3.6	7.3	8.2	6.1	2.4	0.9	2.7	53.3333
O43639	-0.631842	22.37	11	1.10607	380	20	0.85	0	0	6.8	1.1	5.3	8.4	3.2	7.1	2.1	2.9	7.1	7.9	1.1	5	4.5	3.2	6.1	8.9	4.5	8.2	2.6	4.2	72.5789
O43657	0.359184	3.67	1.86	-3.6225	245	0	-0.31	0	0	6.9	4.5	3.3	4.5	6.9	6.1	1.2	8.2	6.1	9.4	2	5.3	2	2.4	3.3	5.7	7.3	8.6	1.6	4.5	100.245
O43660	-0.490467	4.47	53.6	0.77808	514	12	0.34	0	4.86381	8	1.2	5.3	4.5	2.3	6.2	4.9	4.5	6.6	6.8	1.9	3.9	6	3.7	5.4	7.8	8	8	2.3	2.7	75.1167
O43663	-0.714677	33.06	3.04	2.4271	620	45	1.9	0	12.7419	6	1.9	3.2	12.7	2.7	3.7	1.9	4.5	8.1	11.1	2.6	3.7	3.5	6.6	7.1	7.7	5.2	4.7	1.1	1.8	80.5484
O43665	-0.90663	24.86	111	2.09221	173	0	-1.94	0	0	6.4	1.2	6.4	11.6	6.4	1.7	2.3	2.9	10.4	10.4	3.5	3.5	2.3	6.4	4	11.6	3.5	2.3	1.2	2.3	63.6464
O43670	-0.637657	71.34	33.1	2.39706	478	6	5.49	1	26.3598	7.1	1	3.6	3.1	1.5	9.8	2.1	4.2	5.2	4.6	6.5	1.7	19.9	7.3	3.3	6.1	6.7	3.3	0.4	2.5	51.0879
O43674	-0.183069	21.69	23.9	0.231948	189	1	-0.81	0	0	9	0	3.7	7.4	5.3	6.9	3.2	6.9	5.3	9.5	2.1	1.6	6.3	1.1	9.5	4.2	4.2	6.9	1.6	5.3	92.9101
O43679	-0.730295	42.09	0.312	0.970514	373	3	0.73	0	9.65147	4.3	1.9	5.9	6.2	4.6	4.3	2.1	3.2	5.1	8	3.8	5.6	7	4.6	6.4	8.6	9.7	3.8	1.3	3.8	59.0885
O43680	-0.684916	59.22	0.353	2.1364	179	1	0.67	1	0	6.7	1.7	4.5	7.8	1.7	6.7	1.1	1.7	8.4	10.1	2.8	5	5	3.4	6.7	11.2	6.7	6.1	1.1	1.7	70.2793
O43681	-0.108333	9.77	83.4	0.317855	348	2	-0.28	0	0	6.9	2.3	5.7	8.9	5.2	5.7	1.7	6	6.6	9.8	4.6	3.4	6	4.3	2.9	6.3	4.3	6.9	0.6	1.7	88.5345
O43683	-0.475115	54.29	1.23	0.333304	1085	61	0.6	0	0	6.9	1.8	4.3	7.9	4.4	5.1	3.2	3.9	7.1	9.4	3.1	5	6.1	6.1	3.4	7.8	4.5	5.9	1.2	2.8	75.7788
O43684	-0.514024	2.13	155	0.904277	328	11	0.63	0	0	5.2	2.4	6.4	4.9	4.3	5.8	3	4.3	5.2	6.7	2.1	5.5	5.8	4.6	5.2	8.2	7	7.3	1.8	4.3	69.2073
O43688	0.227778	19.44	0.695	-2.97	288	18	-0.51	0	6.94444	8.7	3.1	4.9	2.8	5.2	5.6	2.8	2.4	3.1	13.2	1.7	2.4	4.2	2.4	6.2	7.3	5.2	10.1	1.7	6.9	98.8194
O43692	-0.149225	11.63	0.547	-0.62339	258	1	1.13	0	0	8.9	5	4.7	2.7	3.1	5	1.6	4.7	3.9	7.4	3.1	6.2	7	3.1	5	8.1	4.7	6.6	3.5	5.8	74.8837
O43699	-0.233775	15.23	0.751	-0.856828	453	3	0.84	0	0	7.7	2.2	3.3	5.7	4	7.1	3.1	3.8	3.3	9.9	1.5	3.1	7.7	6	5.3	8.2	6.8	7.1	2	2.2	81.5894
O43704	-0.544595	2.03	1.99	0.823895	296	3	0.34	0	10.1351	3.4	1	5.7	8.4	5.1	3.7	3.4	7.1	10.1	8.4	4.1	5.4	5.7	1.7	3.4	5.1	7.1	4.4	2.7	4.1	76.723
O43707	-0.636773	4.17	575	1.15763	911	69	0.66	1	6.58617	8.5	0.9	6.9	9.5	3.3	4.5	3.4	6.6	6.4	9.2	2.6	5	3.2	6.1	5.6	5.2	4.5	4.1	1.8	2.7	81.8771
O43708	-0.0986111	1.85	45.8	0.646989	216	1	-0.18	0	0	7.4	2.3	4.6	4.6	2.8	4.6	0.9	8.3	5.6	11.1	2.8	3.2	6.9	7.9	5.6	6	5.6	6	0.9	2.8	100.694
O43711	-0.537801	74.57	0.391	1.87841	291	5	3.37	1	12.0275	11.3	0.7	3.8	4.5	4.1	5.5	2.4	2.4	4.1	8.9	1.7	2.7	12	5.8	7.9	9.6	4.8	4.5	1.4	1.7	68.5223
O43719	-1.34795	63.18	30.6	6.39934	755	66	1.9	1	38.9404	5.2	1.3	11.8	18.1	4.1	7.3	1.2	2.1	9	6.1	1.3	3.3	3.7	2.9	4.8	8.1	3.6	3.3	0.9	1.9	46.7947
O43731	0.61215	0.47	0.67	-4.3574	214	2	-0.51	0	16.3551	3.7	1.9	2.8	3.7	9.3	4.7	0.9	8.4	5.6	15.4	2.8	3.3	1.9	2.3	3.7	6.1	7.5	7.5	1.4	7	118.364
O43734	-0.675958	70.91	0.403	1.08677	574	7	2.11	0	13.2404	6.1	1.4	4.7	6.6	3	4.5	3.8	3.8	3.5	8.5	2.4	3.8	13.2	7	6.4	8	3.3	5.7	1	3	71.0105
O43736	-0.0737643	6.46	0.675	0.423365	263	3	0.9	0	0	6.1	2.7	5.7	7.6	5.3	6.1	0.8	7.6	5.3	11	2.7	4.6	4.9	2.7	6.8	5.3	4.9	6.5	0.4	3	97.4905
O43739	-0.64925	16	0.741	1.69723	400	2	0.45	0	0	4.5	1.5	6.8	10.8	4.8	6.5	1.5	6.5	7.5	9.5	2.5	5.8	4.5	2.8	7.2	4.5	4.2	4.5	1.2	3	79.95
O43741	-0.494118	26.1	6.62	1.27104	272	24	-0.2	0	0	4.4	0.7	6.6	6.2	4	6.2	4	4.8	7.4	8.5	2.2	3.7	7.7	3.3	3.3	11	4.8	7	1.5	2.6	76.2868
O43745	-0.619388	8.16	0.889	1.92996	196	3	0.3	0	0	5.6	0	9.2	7.7	5.1	6.1	3.1	4.6	5.1	9.7	3.1	2.6	4.1	5.6	9.7	7.1	3.1	7.1	0	1.5	82.0408
O43747	-0.111679	12.77	85.3	-0.538904	822	12	0.33	0	0	7.3	1.8	4.9	6	2.8	4.7	1.8	6.4	5	12	3.4	5.2	5.1	4.6	5.2	7.3	6.8	6.6	0.4	2.6	98.4672
O43752	-0.420784	22.35	19.3	0.570445	255	13	-1.25	0	0	6.3	0.4	6.3	9.4	3.5	3.9	1.2	5.1	4.3	11.8	3.1	4.3	1.2	8.6	6.7	8.2	6.3	7.1	2	0.4	92.5098
O43759	0.0167382	23.18	2.89	-2.17735	233	1	1.99	0	6.43777	11.2	1.7	5.2	3.4	7.3	9.4	0.4	3.9	2.6	6.9	1.7	3.9	6	6	2.6	8.2	3.9	7.3	2.1	6.4	74.1631
O43760	0.168304	22.32	9.91	-2.83889	224	6	0.66	0	15.625	12.1	2.2	5.4	2.7	8.9	6.7	0.4	3.6	2.2	7.1	0.9	4.5	5.4	4.9	3.6	7.1	4.9	8.9	1.8	6.7	79.7321
O43761	0.241485	22.71	0.662	-1.65389	229	2	0.62	0	21.8341	13.1	1.7	3.5	3.1	8.7	10.5	0	2.2	0.9	10	0.9	2.2	5.2	4.8	6.6	7.9	6.6	7.4	2.2	2.6	82.3144
O43763	-0.51338	69.37	0.446	2.13254	284	2	5.19	1	25.3521	9.9	0.4	2.5	4.2	3.2	13.7	3.5	1.8	3.2	11.3	1.4	2.5	11.6	4.2	9.5	7	3.5	3.9	1.4	1.4	71.9014
O43765	-0.490415	21.73	145	1.70802	313	20	1.77	0	11.8211	11.8	1.3	4.8	8	2.9	6.7	1.3	4.5	4.5	9.6	3.2	6.4	5.8	7.7	3.8	8	3.5	3.2	0	3.2	75.9105
O43766	-0.546505	11.56	0.48	1.74441	372	2	0.38	0	0	6.7	2.7	6.5	6.7	2.7	7	1.6	2.7	8.6	10.8	2.2	4.3	5.9	2.4	6.7	4.8	6.2	6.5	1.3	3.8	77.8495
O43772	0.127243	2.33	14.9	-1.08682	301	7	0.58	0	7.30897	7.6	2	3	3.7	7.3	11	0.7	5.3	6	10	3.7	2.7	8	3.7	4.7	4.3	6	6.3	1	3.3	85.5482
O43776	-0.491058	5.11	248	1.04011	548	11	1.99	1	0	4.4	2.7	5.8	8.9	4.2	7.1	2	4.4	6.4	9.9	2.7	3.6	5.3	3.5	6.9	5.1	5.1	6.4	1.3	4.2	78.4124
O43781	-0.446429	37.24	0.849	1.23131	588	15	2.35	0	0	5.1	2.4	4.8	4.9	3.9	8.3	3.1	5.8	8.2	9.4	2.2	3.7	7	4.4	5.8	7.5	4.3	5.3	0.7	3.4	79.4218
O43790	-0.33251	32.3	93.5	1.30468	486	9	6.2	0	5.96708	8.2	6	3.5	10.5	2.3	7.2	0.8	4.5	4.9	8.4	1.2	4.3	2.5	4.3	7.6	8.6	4.3	7.6	0.2	2.9	80.8642
O43791	-0.24385	9.09	1.08	0.354695	374	3	0.43	0	0	8.6	3.5	5.6	8.3	5.1	4	1.6	3.2	7.8	9.6	3.7	4.3	4.5	2.9	4.3	9.1	2.7	7.2	1.6	2.4	79.5455
O43795	-0.488468	4.05	21.6	0.13906	1136	31	0.31	0	19.4542	6.9	1.6	4.1	7.9	4.8	4.2	1.9	6.1	9.5	9.9	1.7	5.8	2.8	4.6	6.7	6.2	3.7	6.1	1.3	4.1	86.963
O43808	0.274919	4.23	2.32	-2.50837	307	6	-0.96	0	0	7.5	0.7	2.3	3.6	5.9	6.5	2.6	5.2	6.2	14.3	2.6	3.6	2.9	3.6	5.9	5.2	7.5	9.4	1.3	3.3	111.107
O43809	-0.395595	12.78	183	0.778856	227	8	-0.41	1	0	3.5	0.4	3.5	7	5.3	7	2.2	5.3	6.2	11.9	1.8	4.8	8.8	5.3	5.7	3.1	5.7	6.2	1.8	4.4	88.4141
O43813	-0.16817	1.75	109	-1.16344	399	12	0.31	0	8.27068	9	3.3	4.3	4.8	4.3	8	3	4.5	5.5	11.8	2.3	4	5	4.8	4	3.8	4	4.3	1.3	8.3	84.9123
O43815	-0.545769	38.97	16.6	2.10234	780	35	1.82	0	7.5641	9.1	1	7.6	7.8	3.2	6.5	2.7	3.8	6.4	9.2	1.8	4.2	4.4	4.1	4.6	8.6	5.5	5.6	1.4	2.3	76.4615
O43818	-0.417474	20	34.7	1.50755	475	14	0.85	1	0	10.3	2.3	4.8	8.4	2.3	9.3	3.2	4.4	6.1	9.5	0.8	1.5	3.6	4.2	7.6	9.5	2.7	6.3	1.9	1.3	82.8211
O43819	-0.399624	23.31	3.82	0.961184	266	5	0.97	0	0	8.3	1.1	6	4.5	3.4	9.4	3.4	2.6	2.6	12.8	1.5	0.8	6	7.5	9.4	5.3	4.5	6	1.5	3.4	85.8271
O43820	-0.203837	6.47	0.122	-0.718815	417	0	1.41	0	22.0624	11.8	3.1	3.1	3.6	3.6	9.1	6.2	1.9	1	11.5	1.4	2.6	7.7	5.3	7	5	3.1	5.3	4.1	3.6	79.4245
O43822	-0.429297	26.95	0.633	1.88028	256	9	0.28	0	0	7.4	2.7	2.7	10.5	0.8	6.2	2	2.7	3.1	15.2	1.6	2.3	5.1	3.9	10.2	10.5	6.2	4.7	0.8	1.2	91.0938
O43823	-1.0026	63.73	11.3	3.94755	692	31	4.38	1	18.2081	9.5	1.4	7.8	9.7	3.9	10.4	1.9	1.9	5.5	4.6	2.5	3	6.8	4.6	7.5	7.2	4.2	3.6	0.6	3.3	45.3757
O43824	-0.257946	16.47	1.69	1.1411	516	1	0.33	0	9.49612	9.9	1.2	4.8	6.8	2.5	7.9	2.7	3.1	4.7	11.8	1.7	1.9	5.4	3.5	9.5	5.4	5.6	8.7	1.4	1.4	93.3721
O43825	-0.475592	25.83	0.083	-0.976967	422	1	1.61	0	12.3223	5	1.9	2.8	5	5	5.5	4.3	5.9	5.9	10	2.1	6.6	5.9	3.8	6.4	6.4	5.9	3.8	2.1	5.7	77.891
O43827	-0.639017	26.01	0.658	0.375574	346	1	1.46	0	0	4.9	2.6	5.5	6.4	3.2	6.4	2.6	3.5	7.2	9.8	2.6	6.4	2.9	5.2	5.2	8.1	4.3	5.2	2.9	5.2	71.8497
O43829	-0.725167	30.29	0.725	1.91579	449	20	1.12	1	0	6.5	3.8	7.3	9.8	4.5	4.7	4	4.2	9.1	6.7	2.7	2.7	3.3	4.7	4.7	8	6	4.9	0.2	2.2	63.2294
O43837	-0.101558	11.43	171	0.726597	385	6	-0.16	0	0	10.4	1.3	3.4	7	3.1	7.8	3.4	4.9	6.5	8.6	4.2	4.2	3.4	3.1	4.9	6.8	4.4	9.1	0.5	3.1	89.4286
O43847	-0.451347	17.3	30.7	-0.197073	1150	16	1.42	0	10.1739	6.1	1.6	6.3	10.2	5.1	5.4	2.6	4.6	6.5	10.6	2	4.5	4.5	3.8	4.1	5.7	5.6	5.7	1.3	3.7	82.007
O43852	-1.00381	16.83	169	2.61692	315	18	-0.86	0	14.6032	5.4	0.6	14.6	11.4	5.4	5.1	3.2	3.5	9.2	6.7	2.9	2.5	2.5	3.5	4.1	3.5	4.4	5.4	1.9	4.1	60.6667
O43854	-0.490208	3.75	4.74	0.418599	480	4	2.24	0	5	4.8	5	5	5.6	3.1	9.6	2.3	6.2	5.6	6	1.9	6	5.6	4.6	5	6	5.6	5.2	2.5	4.2	67.8333
O43861	0.000784656	13.86	0.19	-4.32055	1147	28	0.4	0	8.19529	7.1	2.4	4.3	6.3	4.8	5.8	1.9	5.2	5	10.6	3.2	2.5	3.3	4.3	5.8	7.9	6.3	8.2	1.4	3.7	92.7986
O43865	-0.265283	15.28	18.8	0.137733	530	28	0.37	1	0	8.1	3.6	6	6.2	2.8	6.2	1.5	5.1	7.2	7.9	2.6	4.2	3.4	4.3	4.7	6.8	6.2	8.1	1.5	3.4	82.4151
O43866	-0.442651	4.32	594	0.750871	347	1	1.33	0	19.0202	4.9	7.8	6.3	7.8	2	11.2	2.9	2.3	4.6	7.8	0.6	2.3	4.3	5.5	5.8	7.2	3.7	8.4	3.2	1.4	68.4726
O43868	0.490729	9.57	0.167	-5.48512	658	2	2.3	0	6.83891	9.4	3	2.1	5	6.8	7.9	1.1	6.1	4.3	12	2.6	3	3.2	3.2	3.6	7.8	6.2	8.2	2	2.4	103.754
O43869	0.623035	5.69	0.009	-5.45308	369	2	-0.25	0	18.4282	6	3.5	2.4	2.7	7.3	5.1	2.4	6.8	3.3	13.3	5.4	3	4.3	1.9	3.8	7	7	7.6	1.4	5.7	106.179
O43895	-0.198665	8.9	1.31	-1.48192	674	9	0.79	0	3.11573	7.6	1.3	4.5	5.9	3.4	6.8	2.1	4.6	3.7	9.3	2.4	3.6	4.7	4.5	4.9	8	7.7	7.4	3.1	4.5	83.4718
O43896	-0.73291	38.44	3.9	2.59862	1103	35	5.13	1	8.88486	7.7	1.4	4.9	9.2	2.1	7.4	1.9	3.4	4.7	8.5	2.5	3	8.1	5.3	8.9	7.8	4.4	5.5	1.1	2.3	70.0635
O43897	-0.571668	10.17	0.02	0.084316	1013	8	1.35	0	13.228	4.1	3.9	6.2	7.7	5.1	9.3	2.8	5.4	5.7	6	1.6	4.6	4.7	3.2	5.8	6.9	5.5	5.2	1.9	4.1	63.9783
O43900	-0.725691	43.09	0.373	1.74388	615	19	3.43	0	31.8699	7.6	6.3	4.2	7.5	3.7	7.6	5.4	2.9	2.3	6	1.5	1.3	9.6	4.2	10.6	9.6	3.1	3.4	1	2.1	52.4228
O43903	-0.441534	23.96	0.589	1.42682	313	14	0.43	0	0	5.8	3.5	4.5	7.7	2.9	6.1	1.9	3.5	9.6	12.1	3.2	3.8	6.7	2.9	4.8	8.9	4.5	4.5	1.3	1.9	79.7764
O43908	-0.420253	10.76	0.0505	0.045698	158	1	0.66	0	0	3.2	5.1	1.9	7	1.9	5.7	2.5	7.6	7.6	10.1	1.9	5.7	4.4	6.3	7	5.7	5.7	5.7	1.9	3.2	88.7975
O43909	-0.228836	8.81	272	-1.6792	919	4	3.01	0	0	6.4	2	5.1	6.9	5.1	5.3	2.5	4.7	4.4	10.9	2.4	4.1	6.7	3.7	6.3	6	5.1	7.1	1.5	3.8	87.617
O43913	-0.131724	8.28	14.1	-1.52246	435	2	0.03	1	0	4.8	2.1	5.3	6	6.2	3.4	3.9	5.5	6.9	14	0.7	4.1	4.6	3.4	4.6	6.2	6.4	6.4	0.7	4.6	99.7011
O43915	-0.555932	27.68	0.077	0.901667	354	0	0.14	0	8.47458	4.2	8.5	3.7	8.5	3.7	2.8	4.2	3.7	6.8	7.1	2.3	3.1	6.8	4	6.8	9.9	5.9	5.4	1.4	1.4	61.6667
O43916	-0.259611	9	0.116	0.10695	411	7	0.1	0	0	7.8	2.7	4.9	5.6	4.1	5.1	1.9	3.9	4.4	11.9	1.2	3.9	5.6	3.2	9	6.3	6.3	6.8	1.5	3.9	89.2214
O43918	-0.384037	54.13	0.001	1.66684	545	5	2.61	1	23.4862	11.7	3.3	5	5.9	2.6	8.8	2.8	2	4.4	10.3	0.9	0.9	11.7	4.8	6.6	7.5	4	5.1	0.9	0.7	74.5872
O43921	-0.348826	29.11	0.057	0.229196	213	0	1.04	0	12.2066	8.5	2.8	3.8	5.6	5.2	7.5	2.8	2.3	1.9	10.8	1.4	4.7	12.2	1.4	7.5	6.1	3.8	4.2	1.4	6.1	71.9718
O43924	-0.309333	4	29.4	0.951907	150	0	-2.38	0	0	5.3	1.3	4	10.7	7.3	4.7	0.7	4.7	7.3	9.3	3.3	4	3.3	4	6	7.3	5.3	7.3	2.7	1.3	81.2
O43929	-0.207798	2.75	3.76	-0.038501	436	8	-1.21	1	0	4.6	1.6	3.2	7.6	5.3	3	3.9	5.7	6.7	13.8	3.4	6.2	3	6.4	4.6	8.7	3.2	6.4	0.7	2.1	99.2431
O43933	-0.277007	31.18	10.2	-0.426302	1283	19	0.93	0	0	5.9	1.4	5.8	6.5	3.6	5.8	2.7	5.4	6	12.2	1.8	3.6	4.9	6.4	4.6	9.4	4.4	6.9	1.2	1.6	94.2089
O43934	0.580624	8.46	0.175	-5.96998	449	2	-0.12	0	18.7082	8.2	1.6	3.1	3.8	10	8.2	0.9	8.7	3.6	10.7	2.2	4.2	2.4	2.9	2.2	10.2	5.6	6.7	1.3	3.3	103.185
O60216	-0.711252	50.55	33.2	2.912	631	38	2.08	0	20.4437	5.9	0.8	8.7	11.7	3.3	4.4	1.7	5.5	6.7	9.7	3	4.1	7.6	5.2	4.8	5.4	4.3	4.9	0.8	1.4	79.4453
O60218	-0.324684	0.32	10.6	0.444229	316	10	-1.15	0	10.443	7.6	1.3	5.4	7.9	4.7	4.7	2.8	6.3	10.4	9.2	1.3	3.5	5.7	3.8	3.2	5.1	4.1	7.6	1.9	3.5	90.0949
O60224	-1.14255	43.09	0.722	2.70195	188	1	0.23	0	11.7021	5.3	0.5	6.9	9.6	4.8	5.9	2.1	3.7	11.7	5.3	3.7	5.3	7.4	3.7	7.4	5.3	3.2	4.3	1.1	2.7	52.9255
O60231	-0.60269	24.98	16.2	1.84721	1041	19	1.53	1	21.0375	8.8	1.2	4.3	11.7	3.5	5	1.9	3.2	6.1	10.3	2.1	1.9	4.4	4.6	9.3	5.9	5.4	6.4	0.9	3.2	79.952
O60232	-0.365829	37.69	21.3	1.73563	199	2	-1.07	0	14.0704	14.1	4	5.5	7	0.5	5.5	1.5	2.5	3	12.6	2	2	7.5	8	6.5	6.5	5	3.5	1	1.5	83.0653
O60234	-0.490845	2.82	134	0.930673	142	6	-0.18	0	0	3.5	2.1	6.3	11.3	6.3	2.1	0.7	3.5	7.7	8.5	4.2	2.1	4.9	4.9	7	6.3	4.9	9.2	0.7	3.5	76.7606
O60235	-0.16244	7.18	1.11	-1.26683	418	0	0.83	0	7.17703	7.4	2.2	3.6	4.1	3.3	7.7	2.2	6.7	2.4	8.6	1.7	7.2	4.1	5	6.5	8.4	6.5	7.4	2.2	3.1	88.6364
O60237	-1.03269	70.47	1.76	4.48265	982	65	1.76	0	32.3829	8.1	0.8	5.2	12.5	1.4	4.8	1.5	2.9	6.6	8.4	1.4	4.4	4.3	4.5	8.9	11	6.4	4.2	1.1	1.6	63.9409
O60238	-0.73242	40.64	4.73	1.77727	219	14	1.52	0	16.895	3.7	0.9	4.1	9.1	3.2	7.8	5	3.7	5.5	7.8	3.2	6.8	7.8	2.7	3.2	16.9	1.4	5	1.4	0.9	62.7397
O60239	-0.862198	45.05	0.399	3.38929	455	18	1.67	0	12.967	8.8	1.1	5.9	13	2.2	5.9	0.7	2.9	7.3	7.7	3.1	2.6	4.6	5.5	7	11.2	3.7	5.1	0.4	1.3	64.5934
O60240	-0.35364	34.87	216	1.78899	522	23	2.39	0	12.6437	12.6	1	3.6	8.6	1.5	6.3	1.9	1.9	4	10	1.7	1.9	8.4	4	7.1	8.8	6.1	7.9	1.1	1.3	81.7433
O60241	-0.211924	37.1	0.036	-1.97789	1585	20	3.9	0	6.30915	8.5	4.1	3.6	6	3.5	7.9	1.9	2.2	3.1	10.1	2.2	2.3	8	3.6	6.6	9.8	6.1	6.1	2.2	2.1	74.2461
O60242	-0.283706	37.25	0.038	-2.87418	1522	18	4.3	0	16.0315	5.3	4	4.3	6.2	4.1	5.8	2.4	4.9	4.8	9.3	3.2	5.1	4.7	4.8	5.3	8.6	6.9	6	2.1	2.3	77.8778
O60243	-0.648662	13.38	0.174	0.996665	411	1	1.28	0	11.4355	4.9	2.9	6.1	7.1	4.9	6.6	1.9	2.4	4.4	10.7	2.7	2.7	5.8	4.1	11.4	4.4	5.8	4.9	1.7	4.6	70.219
O60244	-0.185213	21.94	3.34	-1.45397	1454	23	4.16	0	8.94085	7.2	1.8	4.1	4.1	3.6	5.4	2.8	5.4	4.7	11.3	2.8	4.4	8.9	5.6	5.1	8	5.7	6	0.9	2	90.0206
O60245	-0.390365	22.54	0.366	-0.532813	1069	0	3.54	0	22.3573	5.9	0.8	7.7	5.5	3	8.4	1.3	5.1	4.9	8	1.5	5.5	5.9	4	5.2	8.7	6.3	9.2	0.4	2.8	83.1899
O60248	-0.843348	66.95	0.826	2.19058	233	7	4.69	1	13.7339	10.3	1.3	2.6	4.7	1.3	9.4	2.1	0.4	4.7	9	2.6	2.1	13.7	5.2	7.7	11.2	3.9	1.3	1.7	4.7	50.8584
O60256	-0.00135501	4.61	104	-0.045396	369	12	-0.23	0	10.2981	7.3	1.9	5.1	6.8	3	5.1	2.2	10.3	6.5	7.6	4.1	3	5.1	3.8	5.4	7.9	4.3	8.4	0	2.2	101.436
O60258	-0.846759	28.7	0.051	1.61376	216	3	0.28	0	11.1111	6.5	2.3	2.3	5.6	5.1	6.9	2.3	4.2	6.5	7.4	1.9	5.1	4.6	8.8	11.1	5.6	6.9	3.7	0.5	2.8	62.3611
O60260	-0.393763	13.98	0.832	-0.318468	465	17	1.49	1	7.52688	5.8	7.5	4.9	6	3.7	8.2	3.2	3.2	3.9	6.5	1.5	3.7	6.2	5.8	6.7	6.5	5.2	7.7	1.7	2.2	66
O60264	-0.719106	20.91	67.4	2.30429	1052	37	0.51	1	18.4411	5.8	1.1	5.9	9.6	3.9	4.9	1.5	5.4	8.8	9.3	3	4.9	5.4	4.2	7.1	5.3	4.7	4.6	1.5	2.9	76.4924
O60266	-0.0212413	16.7	0.708	-4.22469	1144	16	0.43	0	12.4126	7.1	1.8	4.6	6.6	4.9	5.7	2	4.8	4.9	11.1	3.8	4.4	3.8	3.8	5.3	7.2	5.1	8.6	1.1	3.5	93.9685
O60268	-0.896594	33.09	3.14	2.22003	411	3	2.54	0	11.6788	6.3	1.9	6.1	11.7	5.1	6.6	2.2	2.4	7.1	7.5	2.2	4.4	5.1	4.1	5.4	8.8	5.8	3.2	1.5	2.7	54.4039
O60269	-0.320087	76.42	0.476	1.50965	458	13	1.33	0	26.2009	13.8	2.8	2.8	6.6	0.7	9.4	3.1	0.7	2.2	9.6	2.4	0.9	9.2	5.2	6.1	12.4	4.4	5.7	2	0.2	70.2402
O60271	-0.595761	59.12	19.6	1.20379	1321	139	2.26	0	10.0681	6.4	1.1	5.9	10.1	2.1	6.9	2.3	3.9	6.6	8.9	2	3.6	4.3	5.4	4.7	9.5	5.5	7.6	1.1	2.2	77.9864
O60279	-0.401272	64.39	0.382	0.813412	629	8	1.26	0	9.69793	6.4	2.2	6.4	8.4	2.7	9.7	2.4	3	4.3	9.4	1.7	2.1	7.2	3.8	4.6	8.6	6.5	7.3	1.4	1.9	75.93
O60281	-0.608483	68.05	1.91	0.55002	2723	31	2.48	1	40.6904	5.4	3.2	3.9	8.1	3.5	4	2.5	4.2	8.4	8.8	1.8	7	5.1	5.9	3.5	9.7	6.5	6	0.4	2.1	73.5659
O60282	-0.811181	30.2	7.01	2.54744	957	16	1.05	0	21.4211	6.7	1	6.1	11.5	1.7	3.9	2.4	5.4	9.9	10.1	2.4	5.1	2.2	6.4	5.7	6.5	5.1	5.4	0.2	2.2	83.1661
O60284	-0.747469	95.42	0.012	3.02052	1047	22	2.26	1	8.02292	6.4	3	5.7	9.2	2.2	6.3	3.2	4.1	8	8.6	2	4.9	6.7	4.1	4.2	9.8	5.5	4	0.3	1.7	67.574
O60285	-0.651437	53.71	0.264	1.88201	661	21	1.74	0	0	5.7	1.4	6.1	6.8	2.4	6.1	3.3	5.1	7	8.9	2.3	3.2	6.4	3.5	7.6	11.3	3.6	5.3	0.9	3.2	75.9758
O60287	0.0181858	20.78	12.7	-3.93847	2271	39	0.85	1	31.7041	8.6	1.8	5	6.4	3.6	4.3	2.6	3.9	5	15.8	2.2	2.6	4.8	5.5	4.9	7	5.1	7.3	1.4	2.3	106.72
O60290	-0.313944	22.33	0.932	-0.105334	1169	10	0.43	0	0	7.9	2.7	4.5	8	3.8	6	2.5	4.7	5.4	10.3	2.5	2.6	6.6	3.8	6.9	7.3	4	6.1	1.5	3	83.8666
O60291	-0.467391	48.73	0.77	1.44455	552	26	1.14	0	0	6.9	2.4	7.4	7.4	3.8	5.3	2.5	4.7	4.9	9.1	0.7	3.3	8.7	3.6	5.3	11.6	3.1	6.2	0.2	3.1	78.442
O60292	-0.673723	64.68	1.27	2.0489	1781	103	2.93	0	19.4834	7.9	1.3	5.3	6.1	3.1	7.5	3	3	5.2	8	1.5	2.8	8.9	4.5	6.9	10.6	6.4	4.7	0.9	2.4	64.5143
O60293	-0.716792	66.47	1.63	1.68782	1989	94	4.81	1	27.5515	5.6	1.7	4.8	8.9	3.7	3.9	1.7	3.8	8.6	10.6	1.6	4.7	6.3	5.4	5.8	10	4.6	4.7	1	2.7	75.0226
O60294	-0.101749	4.23	1.89	-0.893259	686	10	1.2	0	0	9.6	2.3	3.6	6.6	5.1	8.3	3.5	3.1	1.6	11.5	1	2.5	5.7	4.2	7.3	8.2	4.5	7	1.9	2.5	86.7638
O60296	-0.522319	60.72	0.446	1.44791	914	23	1.91	0	11.9256	5.3	1.8	4	9.6	2.8	5.3	2.2	4	4.8	11.9	2.3	3.6	5.8	6.9	5	11.9	6.2	4.5	0.3	1.6	80.558
O60299	-0.754235	72.07	0.082	3.18283	673	19	6.66	0	23.477	9.7	1.3	3.3	9.7	1.3	11.6	1.2	1.3	4.8	10.1	1.3	1.3	6.2	7.1	8.3	11.9	3.3	4	0.7	1.5	65.9138
O60303	-0.698393	56.49	0.349	2.01984	1618	41	2.68	0	7.47837	6	1.2	7.5	7.7	2.6	7	3	4.7	5.3	9.3	1.5	3.6	7.2	4.3	7	8.3	5.4	4.9	1.5	2	74.8702
O60304	-0.823542	60.42	0.045	2.31328	480	5	3.01	1	20	5.8	3.3	3.3	10	3.1	9	4	1.5	3.5	9.4	1	1	10.6	6.7	9.4	6.5	4.4	4.8	1	1.7	61.9792
O60306	-0.34862	11.31	14.7	-1.13396	1485	18	1.23	1	11.3805	5.7	1.3	4.8	8.1	5.3	4.3	2.8	6.1	5.3	10.2	2.6	4.8	5.9	4.9	5.9	4.8	6.3	6.2	1	3.6	87.5084
O60307	-0.511077	64.02	0.451	2.07916	1309	62	3.3	0	30.1757	7	1.1	4.8	7.3	3.5	7.6	2.8	3.4	3.6	10	1.7	1.9	8.9	2.9	8.8	12.5	4.7	5.2	0.6	1.8	74.5302
O60308	-0.489946	32.22	0.325	1.24478	925	30	0.89	0	8	8.9	2.2	5	9	2.9	4.8	3	5.1	8	10.3	2.4	2.5	5.6	4.5	6.1	7.2	3.7	5	0.4	3.6	83.1568
O60309	-0.592472	81.95	0.114	0.543948	1634	2	1.78	0	35.8629	5.6	1.2	3.1	9.4	2.5	3.9	3.4	3.8	5	10	1.6	4	10.6	6.8	2.9	9.3	9	5.4	1	1.5	74.951
O60312	-0.170981	31.89	0.194	-2.94946	1499	15	0.67	0	12.0747	7.2	2.6	4.1	5.9	4.5	5.7	2.3	3.7	4.2	12.1	1.8	3.3	5.1	4.3	7.1	9.5	5.7	6.9	1.3	2.7	88.7925
O60313	-0.583646	14.37	37	1.32554	960	0	0.26	0	8.85417	5.5	1	5.9	9.2	3.8	3.4	2.8	5.3	8.9	10.5	2.1	3.9	3.3	4.9	6.5	6.9	5.3	6.6	1.9	2.4	86.3021
O60315	-0.916392	65.16	0.399	3.40209	1214	73	1.32	1	37.6442	4.6	2.1	5.4	9.4	2.7	5.3	4	3.9	8	7.4	3.2	5.5	7.2	4	4.3	10.8	5.4	3.4	0.2	3.1	58.4185
O60318	-0.358283	52.47	3.09	0.095963	1980	41	2.86	0	10.7071	7.2	2.1	4.5	7.7	4.4	6	2.4	2.9	5.1	10.8	1.8	3	6.6	5.3	5.7	10.7	4.7	6.7	1	1.2	80.2778
O60320	0.0289425	44.34	0.003	-0.85374	539	2	2.82	0	10.9462	10.4	3.9	3.9	4.8	3	6.5	2	1.9	1.5	10.9	2.4	2.2	10.9	4.3	4.5	11.3	5.9	7.8	0.6	1.3	82.9128
O60330	-0.2647	13.3	0.054	-0.663652	932	8	1.04	0	0	8.8	0.8	6.5	6	2.7	7.4	1.8	3.9	3.4	10.9	1.3	5.2	5.7	4.2	5	8.9	5.7	7.9	0.6	3.2	89.5708
O60331	-0.488024	47.01	1.6	1.43032	668	18	1.91	0	0	9.4	0.7	5.5	8.7	4	7	2.1	3.7	5.5	8.2	1.9	1.9	6.7	4.3	5.1	9.7	5.7	5.4	0.4	3.6	71.7665
O60333	-0.492731	44.22	2.12	0.427964	1816	62	1.83	0	19.3833	5.9	1.4	5.5	9.1	3.9	5.2	2.3	5	5.9	9.4	2	4	4.9	3.8	5.7	10.3	5.7	5.9	1	3.1	79.4604
O60336	-0.424439	48.55	0.205	1.09277	1514	27	2.09	0	12.6816	7.8	2.1	4.8	6.5	2.4	6.9	2.6	3.6	4.2	9.1	1.4	2.6	8	4.9	6.1	12.7	4.8	6.6	1	1.9	76.6645
O60337	0.38033	6.48	0.128	-6.98879	910	11	0.39	0	26.5934	7.6	2.5	3.4	5.6	4.7	5.9	3.2	6.4	2.5	14.4	2.3	3.7	5.5	4.1	4.4	4.5	4.1	9.5	2.7	3	115.989
O60341	-0.370892	24.41	29.5	0.998936	852	27	3.19	1	10.2113	10.2	1.1	3.8	8.2	3.2	7.7	1.8	3.8	6	9.3	1.8	3.6	7.6	5	5	6.2	5.2	7	1.1	2.5	81.4437
O60343	-0.553082	45.07	10.5	0.84847	1298	77	2.69	0	10.7858	5.8	2.2	4.9	8.1	4	4.5	2.8	4.2	6.1	10.9	2.3	3.2	6.5	6.2	6.2	10.8	4	4.6	0.6	2.2	77.7735
O60346	-0.307455	41.47	0.563	0.668051	1717	34	4.82	0	18.2877	9.6	2.4	4.3	6.9	2.4	7.2	2.5	3.1	3.9	11.4	1.6	4	8.7	4.7	5.6	9.3	4	6.3	0.5	1.7	84.3506
O60347	-0.503484	58.84	0.083	1.52589	775	9	3.13	0	0	9.4	1.8	5.3	9.2	4.6	8.1	1.5	4	4.9	8.9	1.5	2.7	7.6	3.2	7.6	8.1	3.5	4.4	1.4	2.1	72.4645
O60353	0.00113314	31.73	0.495	-3.96342	706	17	0.38	0	10.0567	5.5	4.2	3.7	5.8	5.8	6.7	2.7	5.5	6.1	9.9	2.5	2.4	5	3.5	4.4	7.9	6.5	6.9	1.7	3.1	85.864
O60359	-0.221905	24.76	0.091	-1.18254	315	1	0.61	0	0	7	1.9	4.4	4.4	7	6	3.5	6.7	4.4	7	2.2	3.2	3.8	1.9	8.3	11.7	6.7	5.4	1	3.5	75.873
O60381	-0.686381	47.08	1.08	1.21183	514	14	1.65	1	12.8405	4.9	3.1	6.2	6.6	3.5	6	3.5	2.1	6	7.6	3.1	5.1	6	4.1	4.3	12.8	4.3	5.4	2.1	3.1	58.5992
O60383	-0.394934	41.63	0.377	-0.668334	454	12	1.85	0	0	6.2	2.9	3.5	5.1	4.2	5.1	3.7	4.2	5.7	10.6	2	4.2	6.6	4.2	6.2	11	4.2	4.8	1.5	4.2	77.7753
O60391	-0.0758389	18.12	0.022	-0.945376	1043	6	1.51	0	44.4871	13	1.6	3.9	4.9	3.5	8.1	2.6	2	2.4	13.7	1.3	1.4	9.3	3.6	8.4	6	4.3	6	2	1.6	91.8792
O60393	-0.577858	75.4	0.077	1.90557	691	3	3.22	1	15.1954	7.5	2.6	4.3	6.2	3.2	8.7	1.6	2.3	4.6	9.4	1.7	1.7	15.2	5.9	4.6	9.4	5.1	3.2	1.2	1.4	62.4747
O60403	0.892698	2.86	0.011	-5.79093	315	2	-0.3	0	24.127	7.6	3.8	1.3	2.2	7.6	6.3	3.5	6	2.5	16.5	4.8	2.2	4.1	1.9	2.9	9.2	5.7	7.6	0.6	3.5	117.619
O60412	0.686834	5.33	0.01	-4.67237	319	2	-0.07	0	23.1975	4.4	3.4	2.8	2.2	7.5	6.3	2.2	6.9	2.5	15.7	4.7	3.8	3.4	2.2	3.1	10.3	8.2	6.6	0.3	3.4	111.505
O60422	-0.289676	73.28	0.074	1.79495	494	3	2.6	1	42.915	16.2	0.8	1.6	4.9	2.4	15.6	3.8	1.6	3.6	10.9	2.2	1.6	11.1	4.3	5.9	5.9	3.4	2.2	0.8	1	71.5992
O60423	-0.0646154	18.77	0.015	-4.16237	1300	11	3.25	0	5.23077	7.5	2.2	4.6	6	5.2	5.8	1.8	5.2	4.8	11.4	2.5	3.6	4.1	4.4	6.2	7.2	5.5	7.2	1.6	3.2	93.2308
O60427	-0.0707207	3.6	3.44	-3.42832	444	0	0.81	0	18.6937	7	1.1	3.8	3.8	8.3	5	6.8	4.5	5.6	11.9	2.7	3.8	5.4	4.5	3.6	5.2	3.8	5.9	3.6	3.6	88.0856
O60431	0.512394	6.2	0.234	-4.20411	355	0	0.45	0	0	6.8	2.8	3.1	3.1	6.8	5.6	3.1	7.3	3.7	13.5	4.5	2.3	5.9	3.7	2.5	8.5	7	6.2	0.8	2.8	106.028
O60437	-0.98246	39.12	11.4	4.1075	1756	35	0.38	0	52.3349	7.4	0.6	5.4	14.2	1.3	3	2.2	3	7.6	12.3	1	3.3	2.7	9.3	8.9	5.5	3.2	6.3	0.7	2.1	85.2563
O60443	0.0409274	8.87	4.4	-0.509456	496	5	0.09	0	14.5161	6.5	2.6	6.7	6.2	4.8	6.5	1.2	4.2	5.8	14.5	1.4	2.6	4.2	6	4	7.1	5.2	8.7	0.4	1.2	104.718
O60447	-0.579012	34.94	0.501	1.01595	810	23	0.54	0	10.8642	5.7	1.2	4.2	10.9	3.3	3.7	2.7	4.7	7.3	11	3.6	4	3.2	7	5.6	9.3	4.4	5.6	1	1.7	82.9383
O60449	-0.490418	6.27	0.453	-1.65013	1722	14	1.88	0	16.7247	4.9	3.7	5.7	6.5	4.5	5.9	3.1	4.8	7	8.4	1.5	4.9	4.6	3.5	4	8.7	5.3	4.9	4.2	3.8	70.662
O60462	-0.469495	12.24	0.922	-0.178445	931	3	1	0	0	5.2	2.6	6.4	7.1	4	7.6	2.4	5.8	4.4	8.1	1.9	3.8	6.2	4.2	4.9	8.6	5.8	4.6	2.3	4.2	72.5886
O60469	-0.327286	22.66	0.015	-2.3742	2012	24	1.79	0	24.503	6	1.5	4.6	5.6	2.7	6.6	1.6	6.7	4.7	7.7	1.6	4.5	6.3	4.3	5.6	10.1	7.7	7.2	1.4	3.6	82.5944
O60476	-0.392668	23.4	6.66	0.305108	641	4	0.85	0	0	7.3	0.6	5.3	7.6	4.7	8.3	4.2	5.5	6.9	11.2	2.2	3.7	5.1	1.7	5.9	5	4.2	4.4	2.2	3.9	85.1014
O60477	-0.471485	7.23	0.153	-0.698722	761	2	0.71	0	0	3.5	3	4.5	5.1	5.1	5.1	2.9	5.4	4.3	10.6	2.9	5	3.8	6.7	8.1	8.8	5.4	4.1	1.8	3.7	77.8844
O60478	0.272682	22.81	0.228	-5.56605	399	9	1.29	0	14.0351	5.5	2	5	1.5	8	4.3	0.8	3	4	14.3	1.3	4	6.8	3.5	4.5	8.3	5.5	9.5	2.3	6	100.576
O60479	-0.841463	77.7	0.425	1.7306	287	6	2.65	1	19.5122	8.4	0.7	3.5	3.8	1.7	5.6	3.5	1.4	4.9	8.4	1	4.2	12.2	7.3	4.2	12.5	4.9	3.5	1	7.3	56.5157
O60481	-0.674946	63.6	0.788	1.49958	467	7	2.08	1	8.13704	10.1	2.1	3	4.9	4.9	9.4	8.1	1.7	5.1	5.1	2.6	4.1	8.8	3.2	4.5	10.3	4.7	3.9	0.6	2.8	47.9657
O60486	-0.266199	17.41	0.308	-1.90461	1568	14	1.47	0	0	6.1	3.1	4.8	6.8	4.3	5.5	2.2	5.2	6.9	10	1.5	4.8	4.3	3.7	4.9	8.4	6.4	7	1.3	2.8	85.8482
O60487	-0.0353488	24.19	0.529	-1.31945	215	3	0.85	0	0	7	1.4	6	6	5.1	5.6	2.3	6.5	5.6	9.3	1.4	2.8	4.2	3.3	6	6	5.1	10.2	2.3	3.7	98.3256
O60488	-0.193952	5.77	54.2	-0.644478	711	34	0.96	0	16.315	6	2.7	4.2	6.6	3.2	7.9	1.7	7.3	9	10	3.1	4.9	5.2	2.7	3.4	5.6	5.8	5.6	1	4.1	89.8312
O60493	-0.62963	19.14	118	1.86381	162	13	-0.35	0	0	4.3	0.6	6.2	8	6.2	5.6	1.9	6.2	6.2	8.6	1.2	4.9	6.8	4.3	9.3	4.9	5.6	6.2	0.6	2.5	80
O60494	-0.295115	4.17	9.38	-5.62772	3623	20	4.06	0	52.0011	4.1	4.3	5.4	4.4	5.5	9	2.9	5.5	2.3	7.1	1.2	6.3	6.2	4	3.8	10.6	6.7	5.2	1.5	4.1	68.2998
O60496	-0.648786	35.44	10.3	1.99351	412	25	0.96	0	10.4369	10.7	1.7	4.6	8.7	4.1	8.7	1.2	1.9	3.6	8.7	0.7	1.5	10.4	5.3	8.5	6.6	4.1	4.1	1.5	3.2	64.2961
O60499	-0.264257	20.88	7.05	0.608951	249	9	-0.78	0	0	8.4	0.8	6	10.4	2.8	5.6	1.6	4	4	12	4.4	2.4	2.4	7.2	6.8	6.4	3.6	8.4	1.6	0.8	95.5422
O60500	-0.245608	12.25	3.5	-0.488792	1241	14	1.73	0	0	8.1	1.6	4.4	6.8	2.6	8.3	2.3	2.8	2.3	11.6	1	3.1	8	4.4	6.3	8.1	6.8	7.7	1.9	2.1	86.7446
O60502	-0.337991	22.05	38.9	0.266866	916	18	0.54	0	0	7.1	2.1	5.6	9.6	4.4	5.9	1.3	4.9	6.6	8.6	3.4	3.1	6.1	4	3.7	7.6	4.7	6.3	1.4	3.6	78.2533
O60503	-0.128086	27.12	0.268	-3.33116	1353	42	1.91	0	0	6.7	2.9	4.7	6	5	6.4	2.8	4.4	5.5	10.6	2.3	3.4	4.3	3.9	5	9.5	5	7.4	1.1	3	86.6741
O60504	-0.939642	66.92	5.87	2.34645	671	36	3.47	0	20.8644	6.3	0.6	5.5	6	3.1	7.7	2.8	3	4.2	6.9	1	2.7	11.3	5.5	9.5	9.4	5.1	4.3	2.2	2.8	57.1535
O60506	-0.880899	34.19	246	2.39546	623	22	8.33	1	17.9775	7.5	0.6	6.4	7.2	3.5	12.2	1.9	3	7.4	5.6	1.8	4	5.3	5.6	7.2	4	4	5.9	0.8	5.8	58.5714
O60507	-0.238378	6.76	0.084	0.437178	370	5	-0.09	0	0	5.9	1.9	4.6	6.2	3	5.4	3.2	5.4	7.8	11.1	4.3	3.2	5.9	3.5	5.9	5.4	4.9	7.6	1.4	3.2	92.1892
O60508	-0.553886	18.65	7.48	1.25257	579	22	0.4	1	0	7.1	2.1	6.6	6.9	4.1	6.2	2.8	4.5	8.6	6.6	2.6	3.6	5	4	4.3	7.9	4.7	6.6	2.2	3.6	69.2228
O60512	-0.501781	22.14	1.17	0.965237	393	4	1.47	0	19.8473	6.4	1.3	4.6	4.3	3.1	9.4	4.1	2.3	1.8	11.7	2.3	4.1	10.4	3.8	9.4	6.1	3.8	5.6	1	4.6	77.1756
O60513	-0.386628	15.41	0.51	-0.782721	344	4	0.22	0	0	4.1	1.7	3.8	7	5.5	6.7	3.8	3.2	7.3	12.5	1.7	5.8	3.8	3.5	6.4	4.9	4.4	7.6	1.7	4.7	87.2093
O60518	-0.0848869	5.25	3.72	-1.01434	1105	14	0.28	0	6.33484	8.1	2.4	6.7	7.7	3.5	4	2.3	6.3	5.7	12.4	3	4.4	4.1	5.4	3.6	5.5	3.9	7.1	1.4	2.4	101.846
O60522	-0.301908	36.98	0.092	-1.17032	2096	25	0.88	0	16.6031	5.2	2.9	5.4	8.8	3.4	5.1	1.9	5.3	6.3	10.5	1.6	4.4	5	4.5	4.3	8	4.7	7.8	1.3	3.4	89.8998
O60524	-0.770818	36.9	8.88	2.70345	1076	41	0.71	0	28.2528	6	0.7	7.1	10	2.9	4.6	2.2	4.7	11.2	9.4	2.1	3.7	4.1	5.3	4.5	6.5	5.3	5.9	0.7	3	78.3829
O60542	-0.101923	37.82	0.355	0.646348	156	2	0.09	0	14.7436	11.5	4.5	3.2	3.2	2.6	14.7	2.6	0.6	1.9	14.7	0.6	0	5.1	5.8	9.6	6.4	3.8	4.5	2.6	1.9	84.5513
O60543	-0.139726	18.26	0.101	0.219466	219	7	0.6	0	0	5.5	1.8	5	4.6	5	7.3	1.8	3.7	4.6	12.3	4.1	1.8	4.6	3.7	8.2	7.8	7.8	6.4	0.5	3.7	86.347
O60547	-0.380376	6.45	26.3	0.488068	372	10	-0.43	0	0	7.3	1.6	4.8	7.8	4	7.8	3.2	4.8	7	8.1	1.9	5.1	3.8	2.7	5.4	5.1	5.4	8.3	1.3	4.6	81.7473
O60548	-0.162828	80.61	1.17	1.41199	495	6	4.38	1	48.6869	18.6	1.8	3	4.2	3.6	15.8	3.2	2.4	2.2	7.7	1.2	1.2	14.3	1.6	4.6	7.7	2	2	0.4	2.2	63.8384
O60551	-0.516466	17.67	4.66	0.973537	498	12	-0.55	0	0	5.6	1.2	6.6	6.8	3.8	4.8	2.8	4.6	8.6	10.6	2.6	4.2	5.8	4.2	4.8	7	4.6	6	1.6	3.4	82.6104
O60563	-0.701653	64.88	3.79	0.877522	726	25	2.93	1	17.7686	6.6	1	4	6.1	2.8	4.3	5.4	3.3	7.2	8.5	2.2	4.4	7.2	5.2	4.1	12.4	7.3	5	1.1	2.1	67.1901
O60565	-0.80163	39.67	2.56	1.56328	184	4	0.28	0	0	4.3	4.9	2.7	6.5	2.7	7.6	2.2	4.3	8.7	7.6	2.2	3.3	7.1	7.6	7.6	7.1	7.6	3.3	0.5	2.2	60.4348
O60566	-0.54019	46.19	1.59	0.586748	1050	42	0.78	0	10.381	6.5	2.2	4.3	10.4	3.8	4.2	1.7	5.5	6.3	9.9	1.7	4.2	5.5	6.6	5	8.3	5.1	4.7	1.5	2.6	80.181
O60568	-0.422087	4.34	12.6	-0.111072	738	12	1.05	0	0	4.7	1.4	6.6	6.6	5	7.7	3.1	3.1	3.4	11.4	2	3.5	6.8	3.9	7.3	5.3	4.6	6.8	2.3	4.3	80.935
O60573	-0.873061	20.41	24.4	1.71232	245	3	0.46	1	0	4.5	0.8	6.5	6.5	4.1	6.5	2.4	5.3	7.3	6.9	2.9	6.1	5.3	5.3	7.3	6.9	5.7	4.1	2.9	2.4	64.0816
O60583	-0.676301	64.38	0.608	0.674997	730	29	1.49	0	21.7808	5.1	1.2	4.4	5.1	2.1	4.5	6.3	4.7	7.7	8.1	2.3	3.6	5.6	5.6	3.6	15.5	6.3	5.1	1	2.5	69.4521
O60602	0.0241259	4.55	0.084	-2.77839	858	4	0.16	0	29.7203	4.3	2.2	5.5	4.2	7.1	4.8	2.9	5.7	4.7	15.9	1.2	6.8	3.6	4.7	3.8	8.4	4.7	5.4	1.2	3.1	103.951
O60603	-0.114541	3.83	0.228	-1.27224	784	9	-0.27	0	21.6837	3.6	2.6	4.8	6.6	4.8	3.3	2.6	6	6.2	15.4	2.2	6.2	3.2	3.3	4.1	10.2	5.7	4.8	1.8	2.4	101.199
O60609	-0.12725	19.25	0.164	-0.181866	400	2	-0.05	0	7.25	7.8	7.2	4	4.5	3	3.5	3.2	2	2.8	14.2	3.2	4.8	9.5	3.8	6.8	7.8	5	4.2	1.2	1.5	83.45
O60610	-0.541903	46.23	154	1.94618	1272	46	4.24	1	31.6824	6.8	0.9	5.5	9.7	3.5	5.7	1.2	4.2	8.3	11.1	3.7	3.5	10	4.6	4.6	6.7	3.9	4.8	0.2	1.3	80.1494
O60635	0.675104	0	3.16	-4.28685	241	3	1.62	0	9.12863	10.4	4.6	3.3	3.7	9.1	7.5	0.8	5.8	5	10.8	3.3	5	2.1	3.3	0.4	4.6	7.1	8.7	0.8	3.7	100.373
O60636	0.577828	1.36	0.219	-3.34224	221	1	-0.81	0	20.8145	6.8	5	2.3	5.4	8.1	12.7	1.4	8.6	4.5	10.4	3.2	2.3	1.4	2.7	4.1	5.4	4.5	7.2	0.9	3.2	101.9
O60637	0.520158	0.4	0.523	-3.91673	253	9	0.84	0	5.5336	9.5	5.5	4.3	4.7	4	6.7	2	8.3	3.2	10.3	1.6	3.6	2	2.8	4	4.7	5.5	10.3	1.6	5.5	111.739
O60641	-0.0576626	59.65	7.23	0.79484	907	14	2.32	0	35.9427	16	0.4	5.3	3.7	4.5	6.6	0.9	2.3	4.2	7.7	2.9	2.9	11.4	3.2	1.7	10.7	8.6	5.5	0.6	1	71.1025
O60645	-0.36698	5.42	9.77	0.485085	756	12	0.46	0	0	6.6	1.2	6.6	8.3	2.6	3.4	1.9	5.2	6.9	11.2	3.4	3.2	3.2	5.8	6.5	6.1	5.6	8.2	1.1	3	95.7584
O60656	0.0579245	7.55	1.23	-1.8836	530	8	0.66	0	0	6.8	2.8	4.3	5.5	5.3	5.8	4	4.7	6.2	11.5	4	3.6	4.9	1.9	4.2	6.4	4.9	7.9	1.7	3.6	93.0566
O60658	-0.38275	26.3	1.86	0.734239	829	24	0.35	0	13.1484	7.6	2.4	6.2	7.5	3.7	4.9	2.9	7.4	5.3	8.3	2.5	5.8	4.6	4	6	6.8	5.4	5.5	0.7	2.4	84.8492
O60662	-0.172442	3.63	0.649	0.295907	606	1	0.68	0	8.08581	7.1	2.3	8.1	6.9	4.3	5.4	1.2	6.1	8.6	11.4	1.8	4	4.1	3.3	3.6	6.8	3.1	7.4	1.2	3.3	96.8482
O60663	-0.646517	53.73	0.409	1.44494	402	4	4.34	1	13.6816	6	5.2	6.7	6.5	3.5	7	1.7	2.2	5.7	8	3.7	1.5	6	8.5	6.7	9.7	3.7	4.7	0.5	2.5	59.4527
O60664	-0.385253	13.13	314	1.33836	434	40	0.94	0	9.67742	10.1	0.7	4.8	7.8	1.4	5.5	1.8	2.5	5.5	9.4	2.3	1.2	4.1	9.7	4.4	10.6	6.2	9.4	0.9	1.4	84.2627
O60667	-0.403077	51.28	1.01	0.317856	390	4	3.41	0	0	7.9	1.5	2.6	5.4	2.6	6.9	3.1	2.8	4.4	9.5	2.3	2.1	9.5	3.8	8.2	9	6.7	6.9	1.3	3.6	76.0256
O60669	0.362971	16.74	1.57	-3.86483	478	12	0.08	0	7.11297	8.2	1.5	2.3	3.3	7.1	8.4	1	5.9	5.9	10.9	3.3	3.8	5.9	2.3	2.9	9.6	4.2	8.2	1.3	4.2	97.0921
O60671	-0.13227	6.38	1.14	-0.368929	282	4	-0.34	1	0	4.6	3.9	5.3	7.8	5.7	4.6	1.4	6	4.6	10.3	2.8	5	3.9	5.7	3.5	8.2	6.7	6.4	0	3.5	86.7376
O60673	-0.622875	62.59	0.262	0.653878	3130	67	1.9	1	24.2812	4.8	1.9	5	6.7	3.7	4.2	2.4	5	7.7	9	2.1	5.5	6.2	5.1	5.3	11.1	5.7	5.2	0.6	2.7	74.2843
O60674	-0.432951	6.54	0.286	-0.455516	1132	25	0.18	0	16.8728	4.6	2.4	5	7.6	4.8	5.5	2.9	6.7	7	9.6	2.7	5.8	4.5	4	5.3	6.4	4.8	4.9	1.2	4.3	82.6767
O60675	-0.670513	32.05	1.69	2.03945	156	3	-1.26	1	0	9	0.6	1.9	10.3	1.3	2.6	0.6	1.9	9	10.3	1.9	3.8	3.8	4.5	10.3	9.6	8.3	9	0	1.3	82.5
O60676	-0.192958	17.61	1.25	0.342268	142	0	-3.12	0	0	7	4.2	3.5	7.7	2.8	2.1	0	4.2	10.6	14.1	2.1	6.3	4.2	4.2	4.9	5.6	4.2	7.7	2.1	2.1	100.915
O60678	-0.261394	15.44	12.3	0.164544	531	14	0.75	0	0	6	2.3	7.2	7.9	4.7	5.3	3.2	5.6	7.9	8.9	2.6	3.4	3.6	2.8	2.6	7.7	5.8	7.5	0.9	4	84.4256
O60682	-0.789806	65.53	0.126	2.60764	206	3	2.13	1	0	10.7	1.9	4.4	8.3	1	10.2	1	0.5	5.8	8.3	1.5	2.9	7.8	2.4	9.7	10.7	4.4	5.3	1	2.4	60.2427
O60684	-0.211754	19.4	32	0.504228	536	17	-0.77	0	0	7.5	2.4	5.4	8.2	3.5	4.7	0.7	6.5	4.7	11.4	2.2	5.4	4.5	5.6	5.4	7.6	4.9	6.2	1.1	2.1	95.1679
O60687	-0.554624	5.59	6.25	0.351817	465	10	2.72	0	10.5376	4.9	4.7	5.6	6	2.6	7.1	1.9	5.2	2.6	7.5	1.9	2.8	6.9	5.6	9	7.5	6	4.9	1.3	5.8	68.7742
O60701	-0.224494	5.67	111	0.408147	494	17	-0.37	0	8.2996	7.7	2.4	6.1	6.7	3.8	6.1	1.6	8.3	7.3	7.1	1.6	4.7	4.9	3	5.3	6.7	5.1	7.7	1	3	90
O60704	-0.0938992	8.49	1.14	0.357618	377	4	1.23	0	0	8	1.9	4.5	5.3	2.4	7.2	2.4	4.2	5.3	11.7	3.7	3.4	5.6	3.7	7.2	6.4	3.7	9.3	1.1	3.2	96.9496
O60706	0.12124	11.49	0.013	-5.16071	1549	7	-0.04	0	20.5939	6.9	1.6	4.3	5.4	4.8	5.5	2.2	7.4	5.1	13.2	2.8	4.8	3.2	3.5	4.5	7.1	6.8	6.3	1.6	3	105.571
O60711	-0.443005	31.61	10.2	0.714033	386	21	1.09	0	11.399	7	6	5.2	8	5.7	6	5.4	2.8	5.7	9.3	2.1	2.8	7	4.9	3.1	7	4.9	3.4	0.8	2.8	64.2487
O60716	-0.728202	55.89	87.5	2.26158	968	122	3.62	0	6.92149	6.7	1	6.9	8	1.5	7.2	2.4	4.1	5.6	9	1.9	5.1	5.7	4.2	7.5	7.7	4.9	6.3	1	3.2	76.157
O60721	-0.259236	50.86	0.062	-1.73396	1099	18	2.2	0	22.384	5.9	0.6	3.3	10.7	3.5	6.8	1.6	5.1	5.1	9.6	3.5	2.5	6.8	2.6	4.2	9.6	8.1	6.6	1.8	1.7	82.6661
O60725	0.339789	8.45	2.9	-3.01446	284	1	1.05	0	0	7.7	2.5	1.4	5.3	7	7.4	2.5	3.2	2.8	15.1	1.8	3.2	3.9	2.1	4.6	8.8	6	7	3.2	4.6	99.5775
O60729	-0.513052	32.93	0.387	0.444455	498	7	0.35	0	0	7.2	2.8	5.8	4.8	4.8	5.6	2.6	6.8	6.4	6.8	1.8	4.6	3.8	4.4	7.6	8.4	5.6	4.2	0.8	4.8	72.7108
O60732	-0.470053	81.79	1.41	0.561275	1142	17	2.82	0	51.9264	2.4	0.4	3.3	7.9	6.4	3.8	1.4	3.7	1.4	9.5	1	0.7	12.9	8.8	2.1	23.8	5	3.4	0.4	1.7	63.8354
O60733	-0.220844	8.68	0.095	-0.333426	806	3	-0.21	0	0	7.7	2.4	4.7	6	4.1	6.8	3.6	4.2	4	10.9	3	5.2	5.3	4.3	6.3	6	5.1	7.2	1	2.2	87.5931
O60741	-0.272921	41.69	0.048	-1.24497	890	10	4.21	0	3.70787	6.5	1.2	3.9	4.8	4.6	7	2.1	5.4	4.4	8.2	3.7	4	7.4	6	5.2	8.8	6.3	6.3	1	3.1	77.7865
O60749	-0.534682	31.21	96.8	2.04498	519	21	0.36	0	11.1753	9.2	0.4	6.2	11.2	4.2	3.5	1.5	4.8	7.9	8.3	2.7	2.5	5.2	4.6	5.2	8.7	4.8	6.4	1	1.7	78.7861
O60759	-0.543733	67.41	0.905	1.98603	359	16	1.9	0	13.9276	4.7	2.2	5.6	6.4	3.6	6.4	1.4	3.1	4.5	12	2.8	4.5	3.6	5.6	7.2	13.9	6.1	3.6	1.1	1.7	73.8997
O60760	-0.31206	0	1.32	0.468169	199	0	-2.07	0	0	6.5	1.5	7.5	6	4	3.5	2.5	7	6	11.6	3	4.5	5	4.5	5	2.5	7	4.5	3	4.5	92.1608
O60762	-0.292308	9.23	63	0.560607	260	10	-0.9	0	8.84615	3.5	0.4	4.2	7.3	3.8	8.8	1.5	8.8	6.9	10.8	1.9	3.8	3.8	2.3	8.5	7.7	4.2	6.2	0.8	4.6	97.8077
O60765	-0.898017	10.41	0.094	1.99089	605	9	0.55	1	20.9917	3.1	5.3	1.7	7.3	3.8	6	5.3	5.8	10.4	6.9	0.5	4.5	4	5.5	7.1	11.4	6.1	2.1	0.5	2.8	59.0083
O60774	-0.137106	5.19	0.025	-1.34827	539	2	1.16	0	6.49351	5	1.9	5.6	5.2	6.5	6.5	1.5	5	5.8	9.3	3.5	3.5	5.9	3.2	4.1	7.8	6.7	6.5	2.4	4.3	79.5547
O60779	0.619718	17.3	0.347	-6.84262	497	10	-0.27	0	16.0966	9.1	2	2.2	4	5.6	5.4	0.6	5.8	2.6	13.1	2.4	2.6	4.8	3	3.4	7.8	6.4	10.5	2.8	5.6	113.159
O60784	-0.430894	48.98	29.1	1.84056	492	24	1.16	0	0	8.3	1	6.9	8.9	3.3	6.1	1.4	3.9	3.9	10.8	2.8	4.3	7.1	5.5	5.3	7.5	6.1	5.9	0.6	0.4	82.5
O60806	-0.339062	58.26	0.044	0.326973	448	1	2.61	1	5.35714	7.4	1.1	2.7	4.9	2.9	8.7	5.4	4	3.8	7.6	2	5.4	9.6	2.9	2.9	11.2	5.8	6.9	2	2.9	72.7009
O60809	-0.105696	2.95	0.033	-0.665899	474	1	0.03	0	17.5105	4	3.2	4	6.5	4.6	3.6	2.3	3.6	5.3	17.5	3.2	3	6.3	4.2	7	7.2	4.4	4.9	2.1	3.2	100.359
O60810	0.0282427	0.63	0.004	-0.671593	478	0	0.36	0	23.2218	4.4	5.2	4.8	5.4	4.2	2.9	1.7	4.4	5.9	18	3.3	4	5.2	4.4	6.7	5.6	4.6	5	1.9	2.3	106.255
O60811	0.035654	3.38	0.025	-1.4457	474	6	-0.77	0	24.0506	4	4.9	2.5	7.6	4.2	3.6	3.2	4.9	4.9	19.2	1.9	2.5	5.7	4.2	6.1	7.4	4.9	3.6	1.9	3	108.207
O60812	-0.957679	64.16	93.6	3.25199	293	6	2.76	1	19.7952	7.5	0.3	9.6	9.6	2.7	8.2	1	3.4	10.2	5.1	2.7	5.1	3.4	4.8	4.4	10.6	2	6.8	0	2.4	60.5802
O60813	0.0225941	0.42	0.022	-0.575353	478	0	0	0	23.2218	4.6	5	4.8	5.2	4	2.9	2.1	4.6	5.9	18.2	2.9	3.6	5.2	5	6.9	5.4	4.6	5.2	1.7	2.1	108.703
O60825	-0.530891	17.03	5.14	0.578499	505	22	0.6	0	5.34653	5.1	1.8	5	7.9	3.8	4.4	1.2	5.1	6.7	8.7	2.6	5.9	5	4.4	7.3	6.3	5.1	7.5	0.8	5.3	81.0297
O60826	-0.502552	18.82	14.5	2.11132	627	8	-0.1	0	30.622	9.6	1	4.6	9.9	1.9	4.6	2.6	3.3	4.5	14	1.1	1.6	5.3	7.5	9.1	6.2	4.9	5.9	1	1.4	94.4817
O60828	-1.51094	56.98	66.7	4.51852	265	12	1.76	1	24.1509	7.5	0.4	12.8	9.1	0.8	5.3	3.4	1.1	8.3	6.8	0.8	1.9	7.9	1.9	11.3	8.3	3.8	3.4	1.5	3.8	48.3019
O60831	0.555056	3.37	25.7	-1.72849	178	2	0.05	0	19.1011	13.5	3.4	2.2	3.9	2.2	7.3	2.2	3.9	2.2	19.1	1.1	3.4	5.1	2.2	7.9	4.5	2.8	9	1.7	2.2	129.382
O60832	-0.482879	28.79	115	1.70508	514	18	-0.02	1	12.0623	7.6	1.6	4.9	8.4	1	6	2.5	6	12.1	8.9	2.3	1.8	4.5	3.1	5.8	5.8	5.8	8	1.2	2.7	89.144
O60840	-0.00758725	37.08	0.047	-5.9639	1977	15	3.44	0	11.6844	7.1	2.1	4.5	7	6	7.6	2.2	5.7	3.8	11.3	2.5	3.7	5	3.5	5.9	6.5	5	6.9	1.2	2.4	93.3637
O60841	-1.04926	49.34	105	5.87448	1220	55	2.78	1	37.2131	6.1	0.7	7.3	14.9	2.2	5.3	1.4	5.7	15	7	1.8	2.9	3.9	4.3	4.3	5.8	4	5.7	0.4	1.3	72.0164
O60844	-0.0826347	13.77	2.88	0.094862	167	5	1.56	0	0	5.4	1.8	4.2	2.4	3.6	13.2	2.4	4.8	4.8	10.8	0.6	3.6	3	2.4	6	12	3.6	7.8	1.8	6	88.6826
O60858	-0.133907	1.97	0.099	-0.839733	407	6	0.19	0	7.61671	3.9	3.7	5.7	7.4	7.6	3.4	1.2	5.9	8.6	12.3	2.2	4.2	4.7	4.4	3.2	6.9	5.9	5.2	1.7	2	89.8034
O60861	-0.862815	17.23	2.35	1.91691	476	19	2.38	0	0	5.7	1.3	4.6	9.7	2.5	5.9	2.7	2.9	8	8.8	2.9	3.2	6.3	6.3	6.1	7.8	6.1	4.6	2.1	2.5	64.958
O60869	-0.927703	23.65	187	2.63138	148	6	-1.57	1	13.5135	10.1	0	5.4	7.4	0	8.1	2	6.8	13.5	6.8	0.7	3.4	3.4	7.4	6.8	4.1	6.8	5.4	1.4	0.7	78.5135
O60870	-0.85827	11.45	2.3	2.43539	393	15	1.24	1	12.2137	4.1	1.8	4.8	10.7	3.1	5.9	2	6.6	12.2	7.9	1.8	3.3	2.5	4.8	6.1	7.6	6.6	4.1	1.3	2.8	72.4427
O60879	-0.60654	31.52	6.49	1.8524	1101	10	3.27	0	25.5223	5.9	1.2	4.9	10.4	3.8	4.4	1.6	5.7	9.2	11.6	2.9	6	6.5	4.5	5.3	6.3	3.4	4.1	0.3	2.1	85.4133
O60882	-0.407246	12.01	0.217	0.421154	483	18	2.9	0	5.38302	7.7	0.6	5.4	5	6	7.9	2.9	4.1	7	7	2.9	3.5	6.4	3.1	4.8	7	5.8	6	1.4	5.4	68.6749
O60883	0.22183	28.69	0.293	-3.76339	481	8	1.19	0	4.9896	7.5	5	2.1	5.4	3.5	6.7	1.5	4.4	3.1	12.9	1.9	2.7	7.1	4.4	4.6	8.3	6	7.9	2.3	2.9	97.6923
O60884	-0.697816	17.23	117	1.68885	412	13	2.12	0	12.1359	3.9	2.7	5.8	9.2	3.6	12.1	2.7	4.4	7.8	7	2.7	4.4	4.9	5.1	5.8	5.8	2.2	6.8	0.2	2.9	68.0825
O60885	-1.08106	78.63	15.5	3.96482	1362	64	2.73	0	36.417	7	0.6	3.5	7.5	1.8	2.2	3.3	2.8	8.3	6	2.6	2.6	17.3	10.8	4.6	7.9	4.5	5.1	0.4	1.3	56.0279
O60888	0.377095	39.11	138	-0.235218	179	3	-0.23	0	12.8492	9.5	1.1	2.2	6.1	2.2	5.6	0.6	4.5	3.4	11.7	2.8	1.7	8.9	3.4	3.9	11.2	4.5	12.8	1.7	2.2	109.944
O60890	-0.668454	29.43	0.611	1.55897	802	9	1.62	0	8.35411	4.2	1.4	4.9	9	4.5	4.9	2.5	5.7	8.4	8.7	2.5	3.9	7.9	4.6	5.9	7.2	6.2	4.6	0.5	2.6	74.0274
O60894	0.210811	12.16	0.017	-1.29055	148	3	-0.4	0	0	8.8	4.7	3.4	5.4	4.7	6.1	2.7	4.1	1.4	12.8	2.7	1.4	4.7	2.7	9.5	3.4	6.8	8.1	4.1	2.7	98.1757
O60895	-0.0114286	20	0.226	-0.13621	175	0	0.01	0	0	9.1	2.9	5.1	6.3	4.6	5.1	2.9	5.7	2.3	12.6	2.3	2.9	9.1	3.4	6.3	4.6	5.7	5.1	2.3	1.7	95.3714
O60896	0.301351	9.46	1.06	-0.935939	148	0	-0.08	0	0	5.4	5.4	4.1	6.1	4.1	8.1	1.4	4.1	2.7	13.5	4.1	4.1	6.8	2	5.4	2.7	6.1	9.5	2.7	2	101.351
O60902	-0.521148	77.34	12.9	2.00569	331	3	5	1	26.284	13.6	1.2	3.9	7.6	3.3	12.7	3.3	1.2	5.7	8.5	2.1	2.1	5.1	4.8	7.3	6.6	3.9	5.4	0.3	1.2	67.0695
O60906	-0.134043	11.11	0.432	-1.26845	423	0	0.38	0	0	8.3	2.1	3.8	5.9	4.5	8.3	5	3.1	3.8	13.9	2.1	2.8	5	5.2	4.7	5.4	4.3	5.4	2.4	4	90.4255
O60907	-0.333795	8.15	3.29	0.462795	577	15	1.35	0	0	9.5	2.4	5.2	5	3.3	8	4	5.4	4	6.6	1.7	5.7	3.6	4	4.3	10.4	6.9	6.1	2.3	1.6	73.7608
O60909	-0.293011	19.62	0.041	-0.285653	372	3	1.08	0	0	6.2	1.9	5.4	3.5	5.4	7.8	3.5	5.1	3	10.2	2.2	3.8	8.9	3	9.1	6.7	4	5.6	1.1	3.8	82.3118
O60911	-0.492216	5.39	2.38	0.521483	334	1	2.15	0	7.18563	8.1	2.7	3.9	5.7	5.4	9.9	1.8	2.1	8.4	5.7	3.6	7.2	3.6	3.9	3.9	6.9	3.3	7.2	2.7	4.2	59.2814
O60921	-0.0942857	3.57	1.82	0.169087	280	5	-1.09	0	7.5	5.7	2.5	4.6	7.5	3.9	2.5	3.6	6.8	7.9	12.5	3.2	7.5	4.3	2.9	3.2	6.8	5	7.9	0.7	1.1	103.714
O60928	0.00916667	9.44	0.193	-2.19868	360	3	-0.02	0	0	6.9	1.7	5	5	6.1	5.3	3.3	5.8	3.1	10.6	4.2	3.3	5.3	3.9	4.7	8.6	6.9	5.8	1.4	3.1	87.7778
O60930	-0.626224	27.27	0.69	1.16061	286	4	1	0	0	9.8	1.7	4.2	7.3	4.5	9.4	3.1	3.5	5.9	5.2	2.4	4.2	4.9	3.8	8.4	5.9	4.2	6.3	2.8	2.1	62.1329
O60931	0.531608	7.9	0.074	-6.35675	367	2	-0.63	0	28.3379	3.5	1.4	2.2	2.5	9	6	1.1	7.9	3.3	11.4	1.4	6	4.6	4.4	3.3	7.9	6	11.4	2.7	4.1	112.18
O60934	-0.698408	48.41	12.1	1.58742	754	49	0.58	1	15.3846	4.8	1.6	5.3	8.8	3.4	4.8	1.5	5.3	9.3	8.2	2.1	6.1	5.2	5.2	4.4	9	6.8	5.6	0.9	1.9	73.687
O60936	-1.04615	54.81	10.2	4.31558	208	11	2.58	0	33.1731	10.6	1.9	7.2	18.8	0.5	8.2	1	0.5	1.4	9.6	0.5	0.5	14.4	3.4	7.2	4.8	3.8	2.9	1.4	1.4	58.3173
O60938	-0.216761	3.98	1.79	-0.265408	352	5	0.55	0	8.52273	4.3	2	4.5	5.7	4.8	3.1	2.6	6.8	5.1	14.2	2.8	8.5	7.4	4.3	5.1	6.5	4	4.5	1.4	2.3	99.4318
O60939	-0.363256	26.05	0.896	-0.274767	215	5	0.01	0	0	3.7	2.8	5.6	7.4	4.7	6.5	2.3	3.3	5.6	9.3	3.7	6	6	3.3	6	6.5	4.7	9.3	0.9	2.3	79.6744
O60941	-0.555502	32.7	1.67	1.3438	627	23	1.47	0	4.46571	6.7	2.4	3.8	7.8	3.3	4.5	4	3.5	4.9	10.4	4.5	4.1	5.9	6.5	7.2	8	5.1	4.8	0.6	1.9	74.689
O60942	-0.592127	8.21	12	1.40399	597	5	0.24	0	0	3.7	2.7	6.2	7.4	5.5	6.9	2	5.4	8	8.4	3	4.9	7.4	3.7	6.5	4.7	4.9	5	1.2	2.7	71.8258
O75015	-0.0798283	8.15	61.6	-1.17926	233	4	-0.69	0	0	5.2	2.1	4.7	4.3	4.7	4.7	3.4	3.9	5.2	12	1.3	4.3	4.3	4.7	2.6	11.2	6.9	8.2	2.6	3.9	90.7296
O75019	-0.175256	11.45	0.507	-0.724124	489	6	1.81	0	0	6.1	2.2	2.7	4.7	2.9	8	2.9	4.1	3.1	10.8	0.8	2.2	9.2	4.9	4.7	11.9	6.1	6.7	2	3.9	83.9264
O75022	-0.519334	25.99	1.1	0.117571	631	13	2.72	0	9.98415	7.3	1.4	3.6	6	2.7	7.4	3.6	1.4	2.9	10.8	1.7	2.1	10	5.5	5.9	11.1	5.9	5.1	1.6	4	69.588
O75023	-0.283051	21.53	1.5	-0.310558	590	6	2.71	0	10.8475	7.8	2	3.7	5.3	2.4	8	2.4	2.7	3.6	11.9	0.5	1.4	10.8	5.6	5.3	9	5.8	6.4	1.4	4.2	83.322
O75027	-0.00518617	21.28	16.8	-1.44183	752	24	0.09	0	9.84043	9.8	0.7	4.1	4.5	4	8	2.7	5.9	5.6	10.6	2.5	4.4	3.1	3.9	5.3	6.9	5.7	8	1.3	3.1	97.2872
O75030	-0.659506	71.29	1.32	2.11622	526	30	0.54	1	0	5.5	1.9	4.2	8	1.5	4.2	2.7	4.8	5.1	10.3	3.8	5.9	7.2	7.6	5.3	9.5	6.5	4.2	0.2	1.7	76.2167
O75031	-0.137425	4.19	0.115	0.437419	334	1	-0.79	0	15.2695	7.2	2.1	4.2	10.5	3.9	4.8	1.2	3.9	7.5	15.3	2.7	3	2.4	6	5.1	7.2	3.9	7.5	0.9	0.9	103.623
O75037	-0.573855	53.08	0.302	2.18491	1637	26	1.92	0	16.4325	8.2	1.9	5.2	9	2.5	6	1.7	5.6	6.5	9.2	2.1	3.6	3.5	5.8	7.4	8.5	5.7	5	0.6	1.8	80.1283
O75038	-0.571186	52.68	0.181	1.82727	1416	16	3.13	0	16.596	6.7	1.7	5.9	6.1	2.7	9.1	2.1	3.3	4.7	8.8	2.1	2.6	8.1	5	7.5	10.2	4.2	6	1.2	2	71.4901
O75044	-0.636881	49.67	3.18	1.68649	1071	75	2.68	0	0	6.1	2	6.2	7.9	3.3	3.7	2.8	4.9	7.4	8.5	2.6	4	5	6.2	5.6	10.2	5.3	5.8	0.3	2.2	75.2941
O75051	-0.181468	19.9	0.332	-2.78701	1894	25	1.48	0	7.86695	5.4	3	5.4	5.6	3.6	6.2	2.6	5.6	4.8	10.2	1.7	4.2	5.5	4.5	4.9	8.8	5.4	7.9	1.1	3.6	89.9736
O75052	-0.496245	51.58	2.59	1.70104	506	15	1.27	0	0	7.1	1.2	6.3	7.5	2.8	6.3	3	3.8	6.7	11.9	2.2	2.8	5.7	7.3	5.1	8.1	4	6.3	0.6	1.4	86.3439
O75054	-0.43124	13.9	0.71	-1.07644	1194	0	1.89	0	10.8878	5.6	1.7	4.4	8.2	3.9	5.5	2.2	4.3	3.9	8.2	1.1	3.4	5.2	5.4	6.9	10.1	6.3	8.5	2.3	3.2	79.0536
O75056	-0.230995	84.62	0.69	1.00735	442	12	1.85	0	38.914	13.3	0	4.3	7.7	2.5	8.1	0.5	2	2.5	8.8	0.9	0.9	12.7	2.7	5	6.6	12.9	7	0.2	1.4	76.0407
O75061	-0.556955	59.04	0.633	0.333075	913	34	4.16	0	9.09091	6	1.4	5.9	4.4	4.4	8.2	2.8	3.4	6.2	7.9	2.3	3.8	9.1	5.4	3.7	10	5.9	5	1.3	2.7	64.6331
O75063	-0.192176	6.11	1.95	-0.191349	409	2	-0.2	0	0	7.8	2	7.1	5.6	3.4	5.4	3.4	4.6	5.6	11.7	2.4	2.9	5.1	3.2	6.1	4.9	5.1	7.8	1.7	3.9	94.401
O75064	-0.214706	31.08	2.7	-1.00994	1496	22	3.38	0	24.0642	8.4	2.3	3.1	6.8	3	7.3	2.4	2.2	2.5	13.4	1.3	1.5	10.7	4.9	7	8.7	3.9	6.4	1.3	2.9	87.5134
O75069	-0.660085	62.48	0.939	1.80706	709	12	1.85	0	7.33427	8.9	0.7	5.8	7.3	1.6	7.8	3.4	3.4	5.6	11.4	1.7	3.1	4.8	7.3	6.3	10.2	4.2	4.4	0.3	1.8	79.323
O75071	-0.533131	28.69	1.77	1.41657	495	11	1.49	0	0	5.7	1.2	5.3	8.9	2.6	4.8	1.4	4	8.9	11.7	2.4	5.3	4	5.3	4.2	11.1	5.1	6.3	0.6	1.2	85.2727
O75072	-0.285033	5.21	0.189	-1.06404	461	4	-0.59	0	7.37527	4.6	2	5.4	5.9	7.4	5.6	3.3	5.6	8.7	10.4	1.3	3.9	4.6	4.3	3.9	5.6	4.8	6.1	2.8	3.9	84.7722
O75074	-0.438571	35.84	0.616	0.645494	770	3	5.07	0	34.1558	9.5	5.8	6.4	4.9	3.1	10.1	1.9	2.1	1.4	9	0.9	2.1	9.7	4.9	8.4	8.2	3.5	4.2	1.4	2.3	64.5844
O75077	-0.475	18.51	0.209	0.215877	832	14	2.61	0	5.40865	6	5.4	5	5.4	2.9	8.8	3.4	4.6	6	7.8	1.7	4.9	5.3	4.9	4.9	8.1	4.9	5.2	1.3	3.5	69.2788
O75078	-0.344343	16.64	0.599	0.088323	769	6	2.28	0	17.6853	6	5.7	4.7	5.5	3	12	3.3	3.1	3.3	9.5	1.4	3.6	6.1	4.6	6.6	7	4.9	5.9	1.3	2.6	72.1456
O75081	-0.722205	69.68	0.849	2.50683	653	22	2.75	0	21.2864	10.1	2.6	4	7.4	1.8	6	4	1.8	4	8.9	1.7	3.1	11.2	4	8.3	9.6	5.5	4	1.1	1.1	63.4609
O75083	-0.238119	0.17	565	-0.872517	606	20	1.38	0	9.57096	6.3	2	7.4	3.8	3.5	9.7	4	5.6	6.6	6.4	1.3	3.8	3.6	2.8	3	9.2	5.3	9.6	1.8	4.3	81.0066
O75084	0.223868	16.38	0.645	-4.32633	574	4	2.24	0	6.62021	8.4	4	3.1	4.5	6.6	9.1	2.3	4.2	3	10.6	2.8	1.4	7	3	5.4	5.9	5.4	7.1	2.3	4	86.8293
O75093	-0.282725	3.39	0.204	-0.42257	1534	7	3.11	0	13.3638	6.4	6.9	4.8	5.2	3.3	8.3	2.4	4	3.7	11.4	1.3	6.5	5.9	5.5	5.1	6.6	5.3	4.2	1	2.1	78.7419
O75094	-0.246553	5.91	0.778	-0.380709	1523	9	2.21	0	13.1976	5.3	7	5.1	4.8	2.9	6.9	2.8	4.7	5	11.2	1.1	6.2	5.9	4.4	5.6	7.4	5.2	5.9	0.6	2.1	84.6159
O75095	-0.315899	6.23	0.156	-0.521821	1541	4	6.96	0	34.3933	7.8	15.6	4.6	4.9	2.5	14.5	4.3	0.6	1	5.6	0.6	2.7	7.8	4.6	6.1	5.4	4.5	3.8	1.2	1.8	43.4393
O75096	-0.494331	13.54	0.011	-0.084737	1905	14	4.27	0	21.6798	5.9	4.9	9	5.2	2	8.1	2.8	4.9	3.3	8.4	1.7	5	4.6	3.2	6.7	7.7	6.1	5.1	2.7	2.5	72.7979
O75106	-0.0813492	6.48	3.26	-2.0778	756	6	0.47	0	0	7.4	1.1	4	4.6	5	8.3	4.2	3.3	1.9	12.2	1.1	3.4	7.9	4.6	5.8	7.5	4	8.3	1.7	3.6	91.9312
O75110	0.0621777	7.83	0.909	-4.73083	1047	13	0.32	0	9.36008	5.9	2.5	4.2	5.9	4.5	5.4	1.7	5.7	4.4	11.5	2.6	3.1	3.4	4.6	6.1	7.3	6.5	9.4	1.3	4	100.115
O75113	-0.445647	54.35	1.46	1.19493	896	29	1.01	0	0	6	1.8	5	9.2	4.4	4.9	2.3	4.9	5.6	10.5	2	4.6	6.8	5.2	5	7.9	6	5.7	0.7	1.5	82.6004
O75116	-0.843156	53.53	34.1	2.64618	1388	39	1.4	1	28.17	6	1.4	6.5	11.2	2.7	3.3	1.9	4.8	10.4	10.7	3	4.8	3.5	6.6	5.5	6.1	4.2	4.3	0.8	2.4	78.7176
O75121	-0.231785	25.92	0.113	-0.236326	409	7	-0.29	0	0	6.4	1.7	4.4	9.8	3.2	4.6	2.7	6.6	6.4	7.6	2.7	3.9	5.4	3.2	3.4	7.8	8.3	9	0.5	2.4	87.8973
O75122	-0.461592	47.3	10	1.35638	1294	154	2.68	0	12.983	9	1.1	6.1	5.6	2.9	5.8	2.2	3.6	5.7	9.9	2.1	3.8	4.9	3.9	6.7	13	5.6	5.7	0.6	1.9	77.9907
O75123	-0.789552	3.36	0.035	1.08623	536	6	0.14	1	12.6866	2.4	5.6	2.6	9.3	4.3	8	7.1	5.8	7.1	7.1	0.6	3.7	2.8	6.2	6.7	8.6	5.4	3.7	0.4	2.6	63.4515
O75127	-0.417429	12	6.71	0.780231	700	0	0.87	1	13.4286	8.6	1.6	4.4	7.4	3.9	6	2	2.3	6.3	13.4	2.6	3.1	6.6	5.6	6.9	5.4	5.3	5	1.1	2.6	84.3571
O75128	-0.702855	86.28	1.51	2.80101	1261	55	2.9	0	21.4909	8	1.3	5.3	6.9	1.7	6.9	3.3	2.9	6.3	7.8	1.5	3.6	9.8	3.8	5.9	11.7	5.5	6.2	0.6	1	67.7002
O75129	-0.284466	18.6	3.2	-0.889156	1339	7	1.98	0	0	6.3	3.2	5.1	7.1	3.3	7.1	2.3	3.8	4.3	11.2	1.9	2.5	6	4.2	5.8	9.4	6.1	6	1.2	3.2	82.36
O75131	-0.251769	4.66	122	-0.581199	537	14	0.82	1	0	5.4	2.8	6.3	5.2	5.4	6.5	1.1	6.5	6.9	7.8	2	5.6	5.2	5.8	3.4	6.7	5.4	7.4	0.9	3.5	82.9236
O75132	-0.415713	40.14	0.083	0.706284	1171	48	1.32	1	12.895	6.3	2.6	4.9	7.6	3.2	4.7	3	3.8	6.5	9.9	2.9	3.2	6	3.3	5	12.9	4.7	5.9	1.3	2.3	77.0282
O75140	-0.426762	41.98	0.376	-1.40909	1603	38	1.76	0	4.99064	6.2	1.8	5.4	6.2	5	5.7	2.8	3.8	4.6	8.3	2.8	3.4	5.4	5	6.1	9.8	6.1	6.4	1.6	3.6	72.0711
O75144	-0.0155629	14.9	7.8	-1.73704	302	3	-0.39	0	11.2583	6	3	5	5.3	3.3	5.6	2	3.3	2	11.3	1.7	6	4.3	4.6	5.3	9.6	6.3	11.3	1.7	2.6	95.4305
O75145	-0.752261	67	1.59	3.56994	1194	29	3.52	0	34.1709	8.2	0.8	4.4	12.1	1.3	6.8	1.8	2.2	5.4	13.4	2.8	2.9	5.3	4.9	8.7	8.9	4.5	3.3	1.2	1.2	78.4338
O75146	-0.502341	28.93	7.4	1.3858	1068	16	0.51	0	27.4345	10.4	1.1	4.6	9.9	2.2	4.6	3.4	3.8	6.1	12.1	1.4	2.4	3.6	7.1	7	7.6	4.5	6.2	0.5	1.6	90.3933
O75147	-0.241403	5.49	0.65	-0.452685	1896	13	1.85	0	44.9895	8.8	2.8	5	9	2.4	8.7	3	2.4	2.4	10.2	0.7	1	7.2	3.9	8.2	5.6	5.3	10.3	1.4	1.7	88.1013
O75150	-0.871029	38.06	20.2	3.64386	1001	23	2.19	0	29.7702	8.5	1.3	4	14	1.6	5.4	1.9	2.7	7.7	12.1	1.9	2.6	3.9	7	8.8	6.3	4.3	4.5	0.2	1.4	79.1908
O75151	-0.742245	58.85	3.16	2.53177	1096	52	2.19	0	11.2226	7.9	1.6	5.7	6.8	2.9	5.7	2.2	2.7	11.2	7.8	1.6	3	7.8	3.4	4.4	10.1	6.2	5.4	1	2.6	64.4708
O75152	-0.751481	88.89	18.2	2.83604	810	59	2.27	1	20.4938	5.3	1.9	4.7	10	1.6	5.2	1.7	3.6	10.5	7.7	1.6	2.7	7	4.8	5.3	10.7	6.8	8	0.4	0.5	72.3951
O75153	-0.351031	27.96	31.7	0.281199	1309	28	0.64	1	0	7.9	1.9	5.3	8	4	5.9	3.1	4.1	4.8	11	2.2	4.1	5.8	4.7	6	6.7	4.4	6.6	0.5	2.9	85.9129
O75154	-0.725529	58.2	1.39	3.34163	756	13	3.67	0	22.3545	8.1	1.6	6.2	13.1	2.6	8.3	1.9	3.2	3	10.3	1.5	2	9.3	5.7	6.1	8.3	3.7	3.4	0.3	1.5	70.6614
O75155	0.0390777	7.61	1.7	-0.172201	1236	27	0.59	0	26.4563	10.8	2.1	6.1	6.8	3.1	4.9	2.4	3.6	3.9	15.7	2.2	1.5	6	4.4	6.3	7.3	4	7.3	0.3	1.3	106.974
O75157	-0.330641	95.9	2.89	1.22125	780	13	2.08	0	46.5385	11.7	0.9	3.5	4.1	1.4	8.5	1.4	1.9	2.1	6.9	1.9	2.4	13.7	9	2.7	12.2	6.5	7.9	0.3	1	69.2179
O75159	-0.721828	58.58	0.165	1.36596	536	10	0.11	0	0	4.1	3	6	5.8	3.9	5.2	3.5	4.1	5.8	8.6	1.9	3.9	5.6	5.4	8	10.8	5.6	4.7	1.3	2.8	67.1082
O75161	-0.233941	25.25	0.212	-1.30504	1426	17	1.15	0	12.9032	6.9	1.5	3.9	5.9	4.4	6.7	3.9	3	3.6	10.9	1.4	2.2	7.9	6	6.7	8.5	5.2	9	1	1.5	87.3983
O75164	-0.564756	38.91	0.724	0.849522	1064	26	2	0	9.96241	6.9	3.3	4.9	10	4.7	5.5	2.3	3.9	6.6	6.7	2.2	3.2	5.6	4.2	5.9	8	5.1	6.5	1.3	3.4	66.7199
O75165	-0.22247	12.93	18.3	-1.88951	2243	33	1.95	0	17.5658	7.5	1.8	4.5	7.9	4.5	5	2.5	5.6	6.3	11.9	2.8	4.7	4.3	4	5.1	6.3	5.1	5.7	1.1	3.2	92.461
O75167	-1.05978	71.92	1.86	4.31381	634	26	2.36	0	28.7066	7.1	0.3	5.4	10.7	1.9	5.7	1.3	3	9.6	6.8	0.9	3.5	9.1	3.5	6.8	10.1	8.4	4.6	0.6	0.8	58.5016
O75170	-0.330331	50.52	1.9	0.646286	966	22	2.21	0	17.0807	10.1	2.7	6.9	8	3.5	5.9	2.5	3.3	3.6	10.2	1.8	3.6	6.8	4.5	5.1	7.9	5.8	6.1	1	0.6	80.7453
O75173	-0.247192	8.24	0.87	-0.098657	837	4	5.47	0	23.7754	8.2	4.2	5	3.6	3.1	10.5	3	2.3	2.7	10.9	1.7	2.4	9.1	4.5	6.6	7.2	5.4	5.6	1.8	2.3	75.7826
O75175	-0.795618	56.71	23	2.14476	753	26	6.26	0	21.9124	8.1	0.5	5.2	7.3	2.4	6.6	2.5	3.6	6.8	6.8	1.6	3.7	10.8	5.4	3.9	11.2	5.6	4.2	0.9	2.9	60.8234
O75177	-1.01338	93.18	1.4	1.29233	396	1	2.08	0	53.2828	7.1	0.5	1.5	3.3	0.5	12.1	2.8	2.8	1	4.3	4	3.5	6.6	19.4	2.3	13.1	4.8	1.8	0	8.6	39.7727
O75179	-0.392163	50.02	7.7	1.18065	2603	105	4.19	1	40.4533	10.3	1.3	3.9	6.4	1.5	7.7	2.7	3.8	4.9	8.6	2.1	4.8	7.8	4.7	4	10.4	7.1	6.3	0.4	1.2	77.111
O75182	-0.635542	33.13	0.761	1.15681	1162	29	1.72	0	0	5.9	1.6	5.2	9.1	4.6	5.9	2.9	3.4	6.6	9.6	1.6	2.8	5.4	5.6	6.9	8	4	6	1.3	3.4	74.0878
O75185	0.161734	9.09	0.039	-2.37981	946	19	0.94	0	15.0106	6.8	2.1	4.3	7.2	4.2	7.9	0.6	6.3	6.4	12.1	3.4	2.7	4	3.9	3.9	7.4	5.8	8.7	0.6	1.5	104.049
O75190	-0.945706	49.08	17.1	3.16207	326	8	8.81	1	21.1656	6.1	0.3	6.1	8.3	8.6	12.6	2.1	1.8	8.6	5.2	1.2	3.4	6.4	2.8	7.7	9.2	3.7	3.4	0.6	1.8	43.4356
O75191	-0.1	1.31	1.94	-0.185137	536	5	0.03	0	0	9.7	2.4	4.7	5.6	4.5	8.2	2.8	4.1	3.4	9.1	2.4	2.8	5.2	5.8	4.3	9.1	4.1	7.3	1.3	3.2	82.4627
O75192	-0.0995951	8.1	0.149	-0.23012	247	4	-2	0	0	5.7	2	4	4.5	3.2	4.9	2	5.3	7.3	15.4	2.4	3.2	3.2	4.5	6.9	6.9	6.9	6.1	2	3.6	103.806
O75197	-0.28031	11.7	0.096	-1.27544	1615	16	3.15	0	14.2415	7.1	3.5	8.5	4.3	3	7.3	2.4	5.4	3.2	9.5	1.8	3.8	6.4	3.5	6.1	6.8	6.1	6	2.2	3.1	82.6749
O75200	-0.682126	27.05	0.051	0.920801	414	0	1.43	0	21.256	4.3	2.9	4.3	4.1	2.9	3.4	3.1	4.8	8.5	10.4	1.4	3.9	11.4	4.3	9.9	6.5	5.3	5.3	1.9	1.2	79.1063
O75204	0.140336	18.49	0.15	-1.10488	238	3	-0.06	0	0	12.2	2.5	1.7	6.3	4.2	8	3.4	4.2	2.5	13.4	1.3	1.7	7.6	5	4.2	6.3	4.6	5.5	0.8	4.6	96.8487
O75208	-0.458805	35.22	21.9	1.64463	318	10	0.56	0	0	10.7	0.9	4.7	7.9	2.8	6	3.1	2.5	2.8	11	3.8	3.1	4.4	6.9	6.9	7.9	6	4.7	1.9	1.9	77.1069
O75223	-0.496277	7.98	53.6	0.608019	188	3	0.17	1	0	5.3	2.1	4.3	9.6	3.7	8.5	1.1	5.9	8.5	6.9	2.7	5.3	4.3	4.8	2.1	7.4	5.9	5.9	1.6	4.3	72.0745
O75251	-0.113146	24.41	84.3	0.18196	213	3	0.12	0	0	10.3	2.3	4.2	2.3	1.9	8	1.4	3.8	3.3	7.5	4.7	1.4	8	3.8	10.3	7.5	2.8	9.9	1.4	5.2	82.8638
O75290	-0.839158	6.86	0.066	1.00922	641	7	-0.16	1	29.6412	2.8	5.9	1.6	10	5.9	6.9	7.3	5	10.5	7.2	1.2	4.2	4.1	5.9	5.1	6.1	4.5	2.8	0.3	2.7	58.4087
O75293	-0.121875	9.38	0.053	0.371719	160	1	-0.94	0	0	9.4	3.8	6.9	10	1.2	3.8	2.5	4.4	1.9	11.9	2.5	4.4	2.5	6.9	4.4	5	6.2	9.4	1.2	1.9	99.9375
O75298	-0.297064	65.14	4.28	-0.04109	545	8	2.28	0	0	7	0.7	5.3	7.5	2.8	7.9	2	2.9	2.8	13.6	0.7	1.1	7.9	4.4	6.8	10.3	7.2	6.2	1.5	1.5	89.4679
O75306	-0.265875	6.48	81.5	0.495881	463	3	0.56	0	0	7.3	1.5	5.6	6.3	3.9	7.8	2.8	5.2	4.8	9.3	3.9	2.6	6.7	4.1	7.1	4.1	3.9	7.3	1.7	4.1	85.0756
O75309	-0.114113	2.53	0.424	-1.29663	829	6	1.38	0	18.456	8.3	1.1	5.7	6.9	2.7	7.1	3.4	3.6	2.3	11.5	1.9	2.3	9.3	4.8	4.2	7.1	5.3	9.2	1.3	2.1	93.7153
O75310	-0.00699433	7.94	0.352	-2.42606	529	5	-0.57	0	7.75047	6	1.5	5.1	4.3	7.8	5.1	2.8	6.4	7.6	9.6	3.8	4	4.7	3.2	4	6.4	4.7	7	2.8	3	88.9981
O75311	-0.146336	19.4	0.063	-2.04573	464	6	1.24	0	7.11207	6.5	1.7	6.2	4.7	7.1	3.7	1.9	5.8	5.8	9.9	4.1	4.1	5	3.2	6.2	6.9	5.6	5.8	1.7	3.9	84.6983
O75312	-0.514161	12.42	45.3	1.67626	459	9	0.49	0	10.8932	8.1	2.2	5.7	10.9	3.7	5.9	1.7	5.7	4.6	8.1	3.1	5	7.2	5	5	5.2	6.5	4.8	0.2	1.5	75.4902
O75317	-0.466486	12.97	0.185	0.286063	370	2	1.4	0	0	4.6	3.2	5.7	7.8	5.4	4.1	3	5.4	7.3	10	2.2	6.2	3.5	4.1	4.9	6.5	5.9	5.1	0.5	4.6	79.5676
O75319	-0.852785	40.05	0.925	1.50035	377	5	1.74	1	0	4	2.1	4.8	5.8	4	8	5	4	5.6	8.5	1.1	5	7.4	5	8.8	6.4	3.4	4.5	2.1	4.5	65.6764
O75323	-0.61049	15.38	83	0.762926	286	7	0.23	0	4.1958	7	1.4	3.1	7.7	3.1	5.2	3.1	3.5	5.6	11.5	2.4	4.9	4.9	4.5	8.7	5.9	3.8	4.5	4.2	4.5	78.8112
O75325	-0.0652174	8.13	0.131	-0.515368	713	7	1.5	0	16.2693	9.5	2	3.4	5.5	2.5	5.6	2.9	2.8	1.4	16.3	1.5	5	7.9	4.3	7.3	6.5	5.3	6.3	2	2	102.23
O75326	-0.460811	12.31	46.4	0.022249	666	4	2.14	0	0	6.6	2.9	4.4	6	3.8	7.2	3.8	3.2	3.9	9.2	1.7	3.9	7.8	5	6.6	7.8	4.2	6.6	1.8	3.9	73.7838
O75330	-0.994061	15.33	1.99	3.55321	724	14	0.81	0	51.3812	5.9	1	4	15.2	2.2	2.2	1.5	3.5	13.5	13.8	1.8	5.2	1.5	8.8	3.7	7	3.9	3.5	0.3	1.4	83.2873
O75333	-0.359221	41.3	0.117	0.662888	385	6	1.53	1	11.1688	8.8	0.8	4.9	3.4	4.4	6.5	2.9	3.1	4.4	10.1	2.1	2.9	11.2	4.4	6	8.6	6	5.2	1.6	2.9	75.5584
O75334	-0.769451	66.75	0.719	3.12486	1257	22	1.55	0	24.1846	6.8	0.7	4.9	11.9	1.3	4.5	2.7	3.8	5.6	11.9	3.4	3.5	3.6	5.3	8.9	9.4	5.5	4.2	1	1.4	80.1909
O75339	-0.474071	14.27	4.96	0.293168	1184	18	2.39	0	7.77027	6.9	3.4	5.2	5.7	4.1	6.8	1.5	3.7	5	7	2.2	4.3	6.7	4.6	7.8	6.8	6.5	7.3	1.3	3.2	69.8226
O75340	-0.404712	10.99	221	0.184352	191	8	-0.55	0	0	5.8	0.5	9.4	2.6	7.3	8.4	0.5	6.8	3.1	5.8	2.1	4.2	3.7	7.3	7.3	7.3	4.7	6.3	2.6	4.2	72.9843
O75342	-0.196719	0	0.914	-1.15402	701	11	0.49	0	5.13552	6.3	2.3	4.7	6	4.7	6.1	3.1	6.1	4.3	11	2	3.3	7.1	3.1	6.6	4.9	5.8	5.6	1.9	5.1	89.1726
O75344	-0.349235	9.79	0.066	1.24433	327	2	-0.46	0	0	8.3	2.4	6.7	7	4.9	6.7	1.2	2.8	6.1	14.4	2.4	3.4	4.9	4.6	7.3	4.6	3.1	4.3	0.6	4.3	87.4618
O75346	-0.853707	0.2	0.095	1.26231	499	14	0.32	1	34.8697	2.8	5.8	2.2	8.2	4.2	6.4	7.2	5	13	6.6	1.2	4.4	4.2	2.4	4.4	5.8	8.8	3	0.8	3.4	56.8537
O75351	-0.551577	10.14	60.1	1.86348	444	18	0.18	0	9.45946	8.1	0.7	6.5	7.9	3.4	6.8	1.8	5	9.5	9.7	1.8	3.8	5.6	4.3	4.7	7.4	4.3	5.6	1.1	2	81.5315
O75352	0.704453	5.26	24.4	-3.14511	247	2	-0.64	0	19.0283	8.5	2	1.6	2.4	4.9	8.1	2	4.5	4.9	19	2.4	2.8	4.9	5.3	1.6	6.1	6.1	9.3	1.2	2.4	127.085
O75354	-0.138223	20.25	0.302	-0.764636	484	7	1.28	0	0	9.3	1.2	3.9	4.8	5	8.9	2.5	3.9	6.4	9.9	1.7	1.4	5	4.3	5.2	7.6	6.4	7	1.4	4.1	83.657
O75355	-0.0829868	14.93	0.058	-2.92223	529	1	0.17	0	0	6.8	2.5	3.6	5.3	6	6.6	3	4.7	4.3	9.3	1.9	4.5	5.1	4.7	2.8	8.7	6.6	7	1.5	4.9	81.6446
O75356	-0.064486	8.88	2.83	-1.1222	428	2	1.37	0	6.54206	6.3	1.6	4	6.8	6.5	9.6	2.6	3.7	5.4	10.5	2.1	2.1	3.7	4.2	3.7	7	7.5	7.5	1.6	3.5	83.5748
O75360	-0.854425	71.68	0.001	2.36906	226	2	3.17	1	15.0442	9.3	1.8	1.8	5.3	3.5	6.6	4	0.9	2.7	8.4	0.9	1.8	15	5.8	10.2	10.6	5.3	2.2	1.8	2.2	51.9469
O75362	-0.757061	41.98	1.35	1.82817	1048	52	2.03	1	17.1756	6.6	3.1	5.2	6	3.2	6.3	3.4	2.1	8.6	7.3	2.1	4.4	8.6	4.5	4.6	9.9	5.9	5.2	0.3	2.6	58.3683
O75363	-0.928253	99.49	4.78	3.4407	584	13	1.35	0	10.6164	8.7	0.9	7.2	9.2	2.2	8.4	1	1.9	10.6	5.3	1.4	3.9	8	5.5	2.1	9.9	7	6.2	0.3	0.2	54.6575
O75364	-0.406954	82.78	0.551	1.90257	302	4	2.58	1	27.4834	15.6	1.7	1.7	5.6	3.3	7.6	2	0.7	4.3	7.6	1	2.6	11.9	4.6	5.6	11.3	3	5.3	1.3	3.3	63.2119
O75365	-0.26763	2.89	1.23	0.621575	173	1	-0.4	0	0	8.1	3.5	5.2	5.2	3.5	5.2	2.9	4	8.7	7.5	2.9	2.3	6.9	2.3	6.9	3.5	6.9	9.8	1.2	3.5	81.6763
O75366	-0.416606	5.01	1.88	0.265612	819	8	-0.08	0	0	7.7	0.7	6.8	6.8	4.2	7.6	2.1	5.4	7.1	8.4	2.3	3.8	3.9	5.6	4.2	6	5.3	6.7	2.1	3.4	80.9768
O75367	-0.248925	21.51	303	1.64197	372	20	0.08	1	12.9032	10.8	0.8	3.5	5.9	3	9.1	1.6	5.9	12.9	9.7	1.3	4	4.8	1.9	3.2	8.3	4.6	6.5	0.3	1.9	90.2688
O75369	-0.292621	5.38	126	-1.5358	2602	176	1.74	1	40.8916	7	1.5	6	6.3	3.3	10.6	2.2	5.1	6.6	5.4	1.4	3.4	7.7	2.8	3.2	6.8	6.5	10.1	0.6	3.4	77.3751
O75373	-0.831157	0.19	0.045	1.36598	536	13	-0.26	1	27.6119	3.5	6.3	1.7	8.6	5.2	6.5	7.1	5.4	14.2	5.4	0.7	3	3.5	2.2	4.5	6.9	8	2.6	0.7	3.7	53.3209
O75376	-0.922869	90.04	4.95	4.20638	2440	184	2.57	1	43.6066	6.8	0.7	4.2	9.1	1.7	5.4	2.6	4.5	5.8	5.6	1.9	3.3	9.7	6.5	7	11.2	6	5.3	0.3	2.4	61.2541
O75379	-0.589362	8.51	8.26	1.55713	141	7	-0.33	0	0	4.3	0.7	9.2	7.8	3.5	4.3	1.4	7.8	7.8	9.2	3.5	5	3.5	4.3	9.2	6.4	2.8	7.1	1.4	0.7	91.2057
O75381	-0.738992	50.66	32.5	2.38874	377	25	1.39	0	0	7.2	0.3	4.8	10.9	1.6	6.9	2.1	4.2	4.8	8.8	1.3	2.9	7.4	8	5.3	11.4	4.2	5.8	0.8	1.3	74.7745
O75382	-0.325	4.97	3.96	0.707539	744	12	0.84	0	18.0108	8.5	2.6	4.7	6	4	9.4	2.8	3.2	4	9	1.2	3.8	5.5	6	7.1	7	4.4	8.6	0.3	1.7	81.1156
O75385	-0.32019	55.62	0.871	0.855556	1050	61	4.04	0	21.9048	8.1	1.7	3.8	4.9	3.8	8.3	3	3.2	4	10.9	2.2	2.1	10.2	4.9	6.2	11.7	4.5	4.9	0.3	1.5	77.1524
O75386	-0.590271	43.21	0.359	1.5765	442	4	0.81	0	0	6.8	1.6	6.6	6.1	3.2	5.7	2.5	4.1	5.9	8.4	2.9	5.2	5.7	5	7	8.4	4.8	6.8	0.5	3.2	75
O75387	0.372809	17.89	1.11	-4.39626	559	14	-0.23	0	21.288	7.7	2.7	2.9	3.6	6.4	7.9	1.3	4.7	2.9	14.8	3.6	3.6	4.7	4.1	3.9	7.5	7.7	5.7	1.6	2.9	100.34
O75390	-0.164592	6.22	244.7	-0.100832	466	10	-0.2	1	0	8.6	0.9	4.3	5.2	3	7.7	3.2	3.6	5.6	12.7	3.2	4.3	4.7	3.6	4.5	7.1	5.6	6.4	1.9	3.9	90.8584
O75391	-1.02907	10.57	22.1	3.07224	227	17	-0.13	0	11.4537	8.4	0.9	6.6	11.9	3.1	4.8	1.3	4	11.5	6.6	3.1	1.8	4.4	7	7.5	7.5	2.2	4.8	0.4	2.2	63.6564
O75398	-0.285133	64.96	0.939	1.23231	565	13	1.68	1	23.7168	15.6	2.8	4.4	7.4	1.8	6.4	2.3	2.8	4.4	6.4	1.6	3	7.6	3.9	4.1	7.4	8.1	7.1	0.9	1.9	72
O75400	-1.05308	56.53	47.1	4.45075	957	66	2.7	1	26.6458	8.3	0.5	4.9	11.6	2.6	4.2	2.8	2.8	10.6	5.4	4.5	3.2	4.8	4.1	5.9	10.6	6.1	3.7	1.4	2.2	51.0554
O75410	-0.743975	74.91	8.09	3.14256	805	51	2.41	0	32.5466	8.1	1.9	5.7	12.3	2.9	6	1.5	3.9	8.4	7.8	1.2	2.7	6.1	4.3	3.6	11.8	5.7	4.3	0.7	1	66.2236
O75414	-0.22957	5.91	3.03	0.953338	186	0	0.44	0	0	9.1	1.6	3.8	7	5.4	7	3.8	5.4	2.2	9.7	2.2	1.1	5.9	4.8	9.7	6.5	4.3	5.9	1.6	3.2	85
O75417	-0.377799	47.49	0.011	-0.407886	2590	48	1.13	1	20.3861	5.4	1.9	4.7	7.2	3.9	5.9	2.5	5.7	6.9	10.4	2.2	4.7	4.2	5.4	4.9	9.9	5.1	6.1	0.9	1.9	86.0386
O75420	-0.921256	80.48	2.03	4.23942	1035	42	4.64	0	37.3913	7.3	0.9	4.6	11.2	2.7	10.3	1.7	1.5	4.9	10.9	1.4	1.3	8.2	8	7.8	8.5	2.8	2.6	1.8	1.3	63.5169
O75425	-0.0387234	28.09	0.305	-0.342287	235	4	0.52	0	13.617	7.7	0.9	4.3	3.8	4.3	8.5	2.1	3.4	1.7	13.2	0.9	0.4	13.6	6	8.1	4.7	5.1	8.9	0	2.6	98.2979
O75426	-0.196552	11.38	0.036	-0.711975	580	6	0.24	0	0	6.2	4	3.8	5.2	4	9	2.6	2.8	4.3	11.7	2.2	1.6	5.7	6	7.6	6.2	4.8	7.4	1.2	3.8	84.1897
O75427	-0.363982	44.95	3.72	1.44403	683	40	2.61	0	32.3572	9.5	1.8	4.4	6.3	2.5	8.1	1.3	2	2.5	13.6	0.7	2.9	9.8	4.7	8.9	10.5	2.9	5.4	0.6	1.5	86.325
O75431	-0.222053	4.18	62.3	0.131868	263	4	-2.45	0	0	8.7	2.3	3.4	7.6	3.4	5.3	2.3	3.8	6.5	11.8	2.7	4.6	4.2	7.6	3	5.3	4.2	7.2	1.9	4.2	90.4943
O75436	-0.4263	9.48	37.2	0.524294	327	13	-0.38	0	0	3.4	0.6	4.9	10.4	5.8	5.8	2.4	7.6	8.6	8.9	2.8	3.7	4	4.3	5.5	4.6	4.9	7	0.3	4.6	88.1651
O75437	-0.914871	5.61	0.064	1.16765	659	18	-0.27	1	34.2944	2.9	5.5	1.4	9.6	4.4	5.8	5.9	5.2	14.4	6.2	1.5	3.3	3.5	2.9	4.2	7	8.5	2	1.8	4.1	52.9894
O75439	-0.168712	9.61	105	0.443283	489	8	0.87	0	0	9.4	2.7	4.5	7.2	2.7	6.5	2.7	5.7	3.9	10.6	2.7	4.5	3.1	3.1	7	6.7	6.7	6.1	1.4	2.9	91.002
O75443	-0.148213	12.16	0.009	-4.8947	2155	8	2.25	0	28.9559	4.7	6.8	5.4	5.4	5.5	7.8	1.8	4.8	4.4	7.4	1	5.4	4.2	3.7	3.9	7.8	7	7.3	1.4	4.4	73.5452
O75444	-0.489544	66.22	0.064	1.91942	373	7	6.18	1	28.1501	13.4	0.8	3.5	6.4	2.9	14.7	5.1	1.9	3.8	7	2.4	2.4	5.6	5.1	4.8	10.7	2.1	4.6	0.3	2.4	61.126
O75445	-0.263399	27.78	0.045	-6.66224	5202	52	3.22	0	35.4287	4.9	3.7	3.5	5.2	3.7	7.2	2.5	5.3	3.9	8.3	1.5	5.2	7.2	4.7	4.1	9.2	7.8	6.5	1.6	4.1	76.7109
O75446	-0.515455	42.27	12.3	1.58244	220	10	0.44	1	0	12.3	2.3	7.3	3.6	2.3	10.9	2.3	4.1	7.7	5.9	0.9	4.5	5	3.6	6.8	6.8	3.6	7.3	0	2.7	72.3636
O75448	0.00556117	11.93	3.32	-1.59069	989	30	0.32	0	14.2568	8.1	2.6	4.2	6.5	3.6	4.6	2.5	5.2	6.2	14.3	3.4	3.6	4	4.4	3.9	8.5	5.6	5.6	1.8	1.3	99.9292
O75449	-0.589613	21.79	2.06	1.92305	491	20	0.97	0	0	7.1	1	5.9	9.6	2.6	4.7	1.4	4.3	7.7	8.4	4.1	3.7	4.9	2.9	7.3	8.4	4.7	6.9	1.6	2.9	76.4562
O75452	0.0315457	6.62	2.83	-1.23272	317	5	-0.8	0	0	8.2	2.2	4.7	5.7	3.8	6.6	1.3	2.8	6	12.9	2.5	1.9	3.2	2.8	6.3	7.3	5.4	9.5	2.2	4.7	97.1609
O75459	-1.35137	60.27	13	3.73596	146	7	0.37	0	18.4932	4.8	2.1	7.5	18.5	0.7	8.2	0.7	1.4	3.4	5.5	2.1	1.4	11	8.9	6.2	7.5	4.1	4.8	0	1.4	45.411
O75460	-0.344217	17.91	0.232	-0.629682	977	16	1.9	0	0	5.3	1.5	5.5	6.9	4	5.9	3.4	4.5	5.7	11	2	2.6	6.8	4.4	4.7	8.4	6.4	6.4	1.1	3.4	84.2989
O75461	-0.607829	36.3	0.952	2.06737	281	7	0.26	1	0	5	1.1	7.1	9.6	1.8	4.3	1.8	5.7	6.4	10.3	1.4	4.3	5.3	5.3	7.5	7.8	4.6	8.2	0.4	2.1	91.1744
O75462	-0.392654	12.09	0.258	0.518169	422	1	1.86	0	0	7.6	2.8	4.7	3.8	1.9	9.2	2.8	2.6	4	11.1	0.7	3.3	8.5	3.1	7.8	8.3	5.5	6.2	2.8	3.1	79.0521
O75467	-0.628571	16.27	0.298	1.46251	553	12	1.21	1	15.7324	8.9	3.8	2	6.9	4.2	8.7	5.6	1.4	3.8	7.6	0.7	0.9	6.5	5.2	10.1	9.4	6.3	5.4	1.3	1.3	59.8553
O75469	-0.394931	32.95	0.19	0.894227	434	17	2.98	1	0	6	3.7	3.9	8.3	5.5	6.2	2.5	4.4	6.5	10.1	4.4	2.3	4.6	5.8	7.6	6.2	4.8	4.4	0.9	1.8	75.2995
O75473	0.250717	9.26	0.824	-3.46317	907	12	0.46	0	22.7122	6.2	2.9	4.2	3.9	5	4.9	3.2	5.4	3.7	17.2	1.8	5.5	5.8	3.1	2.9	10.4	5.2	5.5	1	2.4	110.309
O75474	-0.32618	53.22	0.629	2.57077	233	0	-0.01	0	16.309	16.3	2.1	5.2	7.3	0.4	10.7	0.4	1.3	0.9	11.2	0.4	0.4	11.2	5.2	10.3	6.4	2.6	6.4	0.9	0.4	83.5193
O75475	-1.41509	64.53	176	4.91032	530	52	0.69	1	28.1132	5.5	0.4	6.2	12.3	2.5	5.8	1.9	3.2	15.8	4.2	2.1	5.1	5.1	5.7	5.1	6.6	6.4	5.1	0.4	0.8	48.9434
O75477	-0.271264	15.61	25.3	0.494006	346	12	0.41	0	0	10.4	0.9	3.5	9.2	3.2	4	2.3	7.5	9	8.4	2.3	4	3.5	4.6	4	5.5	5.8	7.2	0	4.6	92.8161
O75478	-0.629571	15.35	0.188	1.85753	443	5	1.52	1	0	6.5	2.9	7	8.4	4.5	4.3	2.5	5.2	6.8	9.7	3.4	3.4	5.4	4.1	7.9	5.6	4.7	2.9	0.9	3.8	73.1603
O75486	-0.367192	20.5	0.43	1.47981	317	0	-0.58	1	0	10.4	1.6	6.6	6.9	3.8	3.5	2.2	5.7	5.7	9.5	4.1	3.5	2.5	5	7.3	9.1	4.7	4.7	0.3	2.8	83.1861
O75487	-0.329676	19.06	4.19	0.142934	556	8	1.33	0	0	7.7	3.4	5.8	6.5	5.2	5.8	1.8	2.9	6.7	9.2	3.2	6.1	3.8	4.3	4.9	7.9	3.4	7.4	0.9	3.2	76.1151
O75489	-0.292424	20.45	123	0.570941	264	5	-0.7	0	0	8.7	0.8	6.1	7.2	6.1	4.5	1.9	3.4	4.5	9.5	0.8	3.4	6.8	3	8.7	4.9	4.5	9.8	1.9	3.4	87.5
O75493	-0.225	11.59	0.038	0.475259	328	1	0.99	0	0	7.9	0.9	3.7	3.4	4.6	8.2	3.4	3.4	1.5	14	0.6	5.5	8.5	4	8.2	9.1	3.4	5.2	1.8	2.7	90.7317
O75494	-1.76183	67.18	50.5	4.06154	262	42	2.27	1	37.7863	3.1	0.4	6.5	4.2	3.4	3.8	2.3	1.5	8	2.3	1.1	3.8	5	3.1	19.5	18.3	4.2	3.1	0.8	5.7	26.7939
O75496	-0.969856	47.85	10.7	3.24912	209	23	1.1	0	15.7895	5.3	1	4.3	15.8	1.4	4.3	1.9	4.8	9.6	8.1	2.4	6.7	3.8	3.8	4.3	11	4.3	5.3	0.5	1.4	70.9091
O75503	-0.272626	8.1	18.1	-0.722247	358	0	0.91	0	11.7318	6.7	2	4.2	6.4	8.1	7.3	2	4.7	6.1	8.1	2.5	4.2	6.7	3.1	4.5	3.9	6.1	4.7	3.6	5	70.5866
O75508	0.879227	13.04	7.16	-4.35379	207	7	1.3	0	6.28019	11.1	6.3	2.4	1.9	2.9	9.7	1.9	6.3	2.4	13	1.9	1	3.9	2.4	3.4	4.8	7.2	11.1	2.4	3.9	118.696
O75509	-0.396947	38.17	0.219	0.381667	655	30	1.14	0	0	6.1	3.7	4.6	6	2.4	5.5	3.2	4.4	6	9.2	2	3.7	7.5	4.1	5.2	10.4	7.5	6.3	0.9	1.5	77.2519
O75521	-0.276904	16.5	34.6	0.408192	394	17	-0.29	0	0	8.9	1.8	4.3	6.1	4.6	5.6	1.3	3.8	8.4	9.4	2.8	5.6	5.6	2.8	4.6	8.1	5.8	7.1	1.3	2.3	80.9645
O75525	-0.845665	50.58	5.28	2.41673	346	7	3.94	1	6.6474	6.1	0	5.8	8.4	2.3	9.8	1.7	2.9	6.9	7.8	1.7	3.2	8.4	3.8	7.2	5.2	5.8	6.1	0.3	6.6	65.3757
O75526	-1.24949	78.32	13.5	3.90758	392	12	5.36	1	50.5102	6.1	0.8	7.4	5.1	2.6	17.1	1.3	0.8	3.1	4.8	1.8	0.8	10.7	0.5	16.8	9.9	2	2.6	0	5.9	35.4082
O75528	-0.939583	39.12	2.5	3.78139	432	11	1.19	0	21.2963	7.9	0.9	7.9	11.1	1.9	5.3	2.5	3.5	10.2	11.3	1.6	1.9	6.9	4.9	6.9	5.8	3.9	3.5	0.9	1.2	75.7176
O75529	-0.362988	11.38	1.06	-0.51069	589	7	0.43	0	0	6.5	2	6.5	4.9	3.4	5.1	2.7	3.7	3.7	11.7	1.9	4.9	4.1	5.8	5.1	10.9	5.6	5.8	1.2	4.6	83.4465
O75530	-0.573243	12.02	12.6	0.775926	441	17	0.29	1	8.39002	5.4	2.9	8.4	4.8	3.2	5.7	3.4	6.1	7.3	7.5	2.5	5.9	4.3	2.7	5.2	8.8	5	5	2.9	2.9	72.9705
O75533	-0.385583	29.45	152	0.424136	1304	77	4.3	1	6.44172	8.5	1	6	7	2.1	6.8	2.5	6.4	6.4	9.3	3.1	2.9	6.5	4	6.1	4.5	6.3	5.8	1.2	3.6	86.7255
O75534	-0.442607	17.79	75.4	0.474502	798	27	0.94	1	8.77193	5.4	1.9	6.6	7.8	5.5	8.1	2.3	5.6	7.5	6.5	1.9	5.3	4.3	4.1	5.3	5.8	5.3	8.8	0.1	2	78.2331
O75541	-0.868689	38.11	0.225	2.88574	412	3	2.16	1	21.3592	8	2.4	4.9	11.2	2.2	4.9	2.4	1.5	4.6	9.5	3.4	4.1	4.6	7	10.2	8	3.9	5.8	0.5	1	67.5
O75554	-1.25665	43.35	1.78	3.53343	376	22	1.04	0	26.8617	4.5	0.8	6.1	13.3	2.4	6.9	1.6	3.2	13.6	4.8	0.8	4	4.5	4	3.2	10.6	5.9	4.8	1.9	3.2	49.5213
O75558	-0.608362	8.71	70	1.49201	287	6	-1.04	0	0	8.7	2.8	8	8.7	3.1	3.1	2.8	5.6	7	10.1	2.8	3.8	1.7	7.3	8.4	4.9	3.1	5.6	0.3	2.1	86.0279
O75563	-0.809192	33.15	34.8	2.40075	359	26	0.31	0	16.4345	6.1	1.1	10.9	9.7	4.2	5.6	1.1	5.6	8.9	6.7	1.9	2.2	6.1	4.2	3.6	7.8	2.8	4.2	1.7	5.6	66.0446
O75569	-0.429712	18.53	63.6	0.967853	313	19	-0.05	1	0	8.3	2.6	2.9	7	2.6	6.7	3.8	7.3	7.3	8.9	1.6	5.1	5.8	4.5	4.2	8.6	6.4	3.2	0.6	2.6	81.1182
O75570	-0.717753	3.15	0.28	1.10354	445	7	-0.07	0	9.4382	5.4	2.2	5.2	7.9	2.5	4.5	4.7	6.3	6.5	10.8	1.8	4	2.2	9.4	8.1	4.7	4	4.9	0.9	3.8	86.3371
O75575	-0.745946	16.22	3.005	2.04554	148	3	-1.17	0	0	6.8	0.7	2.7	14.2	1.4	1.4	3.4	4.1	8.8	12.2	2	6.1	4.1	6.1	3.4	7.4	8.1	5.4	0	2	85.6757
O75578	-0.118766	6.08	0.259	-1.71346	1167	7	2.37	0	17.2237	7.5	2.1	4.5	5.8	4.8	9.3	3.2	2.8	2.5	12	1.4	2.7	5.8	4.7	6.6	7.8	5.3	8	1	2.2	88.4662
O75581	-0.34129	9.86	0.117	-1.46599	1613	47	3.81	0	22.8146	6	3.3	7.6	5.5	2.9	6.9	2.3	6	3.5	8.7	1.9	4.3	5.6	3.3	6	8.5	5.8	6.1	2.2	3.8	80.6324
O75582	-0.418579	14.21	2.35	0.475066	802	31	0.86	0	8.35411	6.4	1.2	5.6	7.5	4.7	6.6	4	4.6	8.4	10.3	2.4	3.6	4.4	3.6	4	7.9	5.9	5.7	0.7	2.5	81.3466
O75586	-0.558537	31.71	4.15	1.32958	246	4	-0.59	1	0	5.7	0.8	5.3	7.3	3.3	3.7	2.4	6.9	7.7	7.7	2	3.3	7.7	7.3	6.1	6.5	3.3	7.7	1.6	3.7	85.1626
O75592	-0.35109	45.97	34.7	-1.69233	4640	163	4.94	0	12.6724	6.8	3.1	5.2	6.6	3.1	7.3	3	4.7	6.5	9.3	2.2	3.6	5.2	4	4.7	9.6	5.5	6.1	1.1	2.2	78.9739
O75593	-0.416164	58.63	0.003	0.882448	365	2	2.86	1	16.4384	8.2	2.2	2.7	3.8	2.2	9.9	1.6	2.7	3.6	9.9	0.8	2.2	16.4	3.8	6.8	8.8	3.6	4.9	3	2.7	71.6712
O75594	-0.261735	11.22	24.7	0.340921	196	2	0.86	0	0	9.2	3.6	2.6	3.1	1.5	8.7	4.6	3.1	1.5	10.7	3.1	5.1	6.1	6.1	6.6	8.2	3.6	5.6	3.1	4.1	79.1837
O75596	-0.426904	15.74	4.04	0.915423	197	1	-0.4	0	0	5.6	3.6	6.1	5.6	3	7.1	2.5	7.1	9.1	9.6	1	5.6	2	4.6	6.1	6.6	5.1	6.1	2	1.5	88.5787
O75602	0.0950884	1.96	0.227	-0.548002	509	3	-0.78	0	21.8075	12.4	2	4.3	5.9	1.8	4.1	2.6	5.7	5.9	12.4	1.8	3.5	4.9	6.1	3.5	6.5	3.7	9.4	0.4	3.1	110.216
O75603	-0.657708	25.69	0.392	1.0174	506	4	1.21	1	10.6719	7.1	3.2	5.1	5.1	3.8	5.1	2.4	3.4	4.9	5.5	2	4.5	10.7	4.9	5.3	9.3	6.1	5.1	1.6	4.7	56.6996
O75604	-0.613884	45.29	0.127	1.16444	605	4	3.4	0	13.719	4.8	2.5	5.5	4.6	3.6	7.4	1.8	2.6	4.3	10.7	1.8	4	6.3	3.8	8.6	10.7	7.3	3.6	0.8	5.1	67.5537
O75607	-0.289888	35.39	34.3	1.76194	178	11	0.53	1	0	8.4	2.8	5.6	12.4	4.5	7.3	2.8	2.2	3.4	9	2.8	2.2	5.6	3.9	5.1	7.3	5.6	9	0	0	78.3146
O75608	0.066087	2.17	127	0.121917	230	2	0.88	0	0	9.1	2.6	4.8	3.5	3.5	8.7	2.6	7.8	4.8	9.6	3.9	4.3	7.4	4.8	2.6	7	5.2	5.2	1.3	1.3	92.087
O75610	-0.254918	17.76	0.436	0.583715	366	0	-0.04	0	0	8.5	2.5	3.8	6.6	3	7.1	2.5	1.6	2.5	13.7	2.2	1.4	7.7	6.8	9	6.8	3.6	7.4	2.5	1.1	89.5355
O75616	-0.156979	16.02	4.5	0.20497	437	2	0.71	1	10.2975	5.7	2.1	3.9	5.3	2.3	5.9	3.4	3.9	6.2	12.4	1.8	2.7	6.9	6.6	5	8.7	4.1	10.3	1.6	1.1	98.9474
O75618	-0.550314	30.5	0.594	1.42828	318	1	1.02	1	10.6918	4.7	2.5	6.6	6.6	3.5	5	3.1	4.4	5	12.3	1.3	2.8	6	5.3	10.7	5.3	4.7	6.6	0.6	2.8	88.8679
O75626	-0.548364	51.52	0.886	1.19097	825	14	2.77	1	9.09091	6.2	2.7	3.6	6.4	3	5.9	3.5	3.4	7.2	9.5	2.5	5.3	9.1	2.8	4.6	9.2	5.5	4.8	0.6	4.1	70.3515
O75628	-0.557718	32.55	0.339	1.47106	298	5	1.33	0	10.4027	10.1	1.7	5	7.4	2	5.4	2.7	2	3.7	10.7	0.3	1.7	6	5	10.4	10.4	5.7	7	1.3	1.3	80.2349
O75629	-0.0713636	19.09	11.8	-0.434074	220	3	0.57	0	0	9.5	0.9	4.5	4.1	4.1	7.3	3.2	3.2	3.2	11.8	2.3	3.6	7.7	2.3	5.5	8.2	6.8	6.8	2.3	2.7	87.8182
O75631	0.0658537	20.21	0.043	-0.404482	287	6	0.22	0	0	8.4	1.7	5.6	3.5	3.5	7.7	0.7	3.8	2.4	12.5	1.7	4.2	6.3	3.8	3.5	10.5	8.7	7	1.4	3.1	92.439
O75635	-0.311842	2.89	0.883	0.338013	380	6	0.93	0	6.84211	6.8	1.3	5.3	7.1	6.1	6.1	2.4	5.8	7.6	8.9	3.2	6.8	2.1	3.4	3.9	9.2	3.7	6.1	0.8	3.4	81.8684
O75636	-0.446823	20.74	467	0.543493	299	1	2.71	0	12.709	6.7	3	4.3	6	3.7	12.7	3.3	1	2.3	11.7	1.7	4	7.7	3.3	6.7	7.7	3	4.3	3.3	3.3	68.8629
O75638	-0.612381	42.38	4.89	1.95959	210	3	5.44	0	20.4762	11.4	1.4	5.2	3.8	2.4	20.5	1.9	1.9	1.9	5.2	2.9	1.4	11.9	3.8	10	6.2	3.3	4.3	0.5	0	51.7143
O75643	-0.327575	10.21	94.2	-1.049	2136	66	1.17	1	12.4064	5.9	1.4	6.3	8.1	3.4	4.8	2.7	6.1	6.4	11.6	2.9	3.8	4	4.8	5.8	5.7	5.4	6.8	0.9	3.4	94.6021
O75648	-0.290974	6.65	1.37	-0.104794	421	3	0.94	1	0	7.8	2.4	6.2	5.7	5.9	7.1	3.8	3.1	5.9	9.7	1.9	3.1	4.3	4.5	6.7	4.8	4.3	8.3	1.4	3.1	81.9715
O75663	-0.400735	8.46	151	1.11733	272	5	0.05	0	0	4	1.5	5.9	9.6	5.5	4.4	4	5.5	7	9.9	4	2.6	4.8	2.9	4.8	8.1	5.9	5.5	1.1	2.9	80.2574
O75665	-0.808004	53.46	1.42	3.1645	1012	44	3.22	0	29.6443	6.1	0.8	4.2	12.9	2.9	2.9	2.2	4.2	9.5	11.8	2.4	4.2	3.4	7.2	5.8	9.2	3.3	4.6	0.2	2.2	82.0257
O75674	-0.465336	49.58	4.39	0.992584	476	13	0.57	0	7.77311	6.3	0.6	4.8	7.6	2.9	3.8	2.5	5	5.5	10.3	2.9	7.8	7.4	6.3	2.9	8	6.3	6.5	0.4	2.1	85
O75676	-0.344171	11.66	3.35	0.738523	772	31	1.34	0	0	8.8	1.3	4.1	7.8	4.7	8.4	2.7	3.2	4.7	11.4	1.7	2.2	6.5	4.9	7.9	6.7	3.6	6.3	0.8	2.2	84.3005
O75678	-0.250529	8.73	0.072	0.375707	378	0	0.66	0	0	5.6	4.8	5.8	6.1	4	6.9	1.6	3.4	4	10.6	3.2	3.4	5.3	4	8.7	9.3	4.2	7.4	1.3	0.5	81.7196
O75683	-1.36648	66.76	10.9	5.15321	361	14	0.81	1	52.9086	13.3	0.6	3	11.9	0.8	5.3	0.8	1.4	13	8.9	0.8	1.7	4.2	6.9	14.7	4.7	3.3	3	0.8	0.8	62.1053
O75688	-0.544676	17.12	19	1.56334	479	8	0.71	0	0	7.3	2.1	6.1	10.4	2.1	8.8	3.1	4.2	4.8	7.5	3.3	5.6	3.5	2.1	5.6	9.4	3.3	7.1	0.8	2.7	73.4864
O75689	-0.680749	8.02	4.21	1.17314	374	5	0.06	0	0	8.8	1.6	5.3	7.5	6.4	6.4	3.5	3.5	7	6.7	1.9	2.9	6.1	4.3	8.3	4.5	3.7	5.1	2.1	4.3	63.1818
O75690	0.282353	1.07	0.078	-0.87264	187	7	10.47	0	78.0749	0.5	35.3	0.5	0	0	18.7	0	1.6	5.9	0	0.5	0	5.3	4.3	0.5	24.1	0	2.1	0	0.5	12.9947
O75691	-0.127181	21.9	8.58	-3.1644	2785	53	1.19	1	29.1203	5.8	1.7	4.4	8.4	4.5	3.6	2.8	6.4	8.5	14.2	2.5	3.4	4.1	4.5	4	6.4	5.4	6.2	0.8	2.6	104.072
O75694	-0.128828	13.73	58.4	-1.49229	1391	32	1.98	0	18.6916	7	2	5	5.8	3.7	5.2	2.4	5.9	4.3	12.2	2.6	4	5.8	6.5	4.7	8.8	4.1	6.5	0.9	2.7	96.3911
O75695	-0.269714	9.71	8.99	0.09019	350	11	0	0	7.42857	5.7	4.3	6.9	7.4	7.4	5.7	0.6	6	6.3	6.3	1.7	4.9	4.3	4.9	5.1	6.9	4.6	7.7	1.1	2.3	76
O75712	0.0477778	32.59	0.373	-2.68417	270	8	0.37	0	5.55556	6.7	5.6	4.1	3.7	4.8	5.6	3.7	5.6	5.6	11.1	1.1	4.4	4.8	3	5.9	5.2	4.4	8.1	2.6	4.1	95.2963
O75715	-0.285068	14.48	2.27	-0.091662	221	1	-1.08	0	0	3.6	2.3	4.1	6.3	6.3	7.2	3.2	4.1	10.4	10	1.8	3.6	6.3	5	2.3	5	4.5	8.6	1.4	4.1	83.2579
O75716	-0.216721	3.93	0.538	0.386522	305	3	0.06	1	0	6.9	3	5.2	5.9	3.3	7.2	4.9	5.2	3.3	13.8	3	3	4.6	6.9	6.6	4.9	3.3	4.9	1.6	2.6	95.3115
O75717	-0.564925	36.05	16	1.25483	1129	49	1.49	1	5.40301	6.6	2.3	6.4	8.1	3.7	5.9	2.5	5.3	7.3	8.1	1.9	5.4	4.5	4.3	4.2	9.5	5.5	5.1	1.7	1.9	73.7024
O75718	-0.428678	10.72	6.57	0.29258	401	2	-0.83	0	6.73317	10.5	2.7	6	9	5.7	4	2.7	2.5	5.2	11.5	2.2	3.2	4.7	4	6.7	5	2.5	4.2	0.7	6.7	77.2319
O75746	-0.0202065	6.64	61.2	-0.870259	678	11	0.53	0	6.19469	9.6	1	4.3	5.3	6.2	8.3	1.9	5.8	5	10.2	1.5	3.7	5	4.6	5.3	5.8	5.2	7.2	0.6	3.7	92.6696
O75747	-0.322422	18.48	0.009	-1.79318	1445	11	0.83	0	20.8304	4.2	2.2	4	7.1	5.2	3.9	3.9	6.2	7	11.3	1.9	5.5	5.1	5.3	3.1	9.1	5	5.3	1.7	3	87.7578
O75751	0.499101	7.37	0.959	-4.7339	556	2	-0.1	0	6.47482	8.3	3.1	2.5	4.3	6.5	8.8	0.7	7	2.3	12.9	1.6	2.7	5.6	2.5	6.5	5.6	5.8	8.3	2.2	2.9	110.126
O75752	-0.0564955	7.85	0.412	-2.45429	331	3	-0.16	0	6.94864	3	1.8	4.2	5.4	6.6	3.6	3.9	6	5.1	12.4	3.3	4.8	3.9	2.7	4.8	6.3	5.4	6.6	2.7	6.9	94.1692
O75762	-0.114477	7.24	0.037	-2.80744	1119	7	0.16	0	16.5326	5.7	2.5	4.8	6.3	4.9	5.4	3.8	7	6.8	12.4	3.8	5.8	3.4	4.2	3.7	5.8	4.7	5.2	1	2.9	96.3807
O75764	-0.825	27.3	4.83	2.62838	348	16	0.95	1	11.7816	6.9	3.7	5.7	8	1.1	4.9	1.1	2.9	11.8	8.6	3.4	4	4.9	2.9	7.2	10.1	5.5	4.6	0.9	1.7	65.0575
O75771	0.0865854	3.96	0.916	0.095807	328	4	0.39	1	0	8.8	1.5	4.9	5.5	1.8	10.1	1.2	3.4	3.4	13.7	2.7	1.5	2.1	7	6.1	7	7.3	10.1	0.6	1.2	104.604
O75781	-0.787855	77.26	5.35	2.71073	387	18	0.91	0	12.6615	10.6	0.8	5.2	12.7	0.3	5.7	1.3	3.4	6.2	6.7	2.6	2.1	7.8	5.4	6.7	7	8	6.7	0.3	0.8	69.3798
O75783	0.0689498	14.61	0.051	-1.96416	438	4	0.79	0	0	8.7	2.1	3.4	4.6	3.7	9.4	2.5	2.7	2.1	12.8	3.4	1.8	8	4.1	6.4	6.4	3.7	8	2.5	3.9	92.3973
O75791	-0.830606	23.03	13.5	1.67724	330	15	-0.28	0	5.75758	5.5	0.3	6.1	6.7	5.5	7.9	5.8	3	3.9	8.8	2.1	4.2	6.1	7.9	7.3	7.3	3	4.5	1.8	2.4	64.7273
O75792	-0.3	7.36	33.3	0.645339	299	18	-1.04	0	0	8.4	2	6.4	7.7	3.7	5.7	1	2.7	5.4	10.4	1.7	2.7	5.4	4.3	6	7.7	5.4	8.7	1.7	3.3	84.4482
O75794	-0.53125	11.9	7.08	1.04341	336	12	0.48	0	17.8571	3.9	2.4	10.4	7.4	7.4	3.3	2.1	6	6.5	8.6	0.6	3.6	5.7	4.8	4.2	7.7	5.1	5.1	2.1	3.3	75.4167
O75795	-0.039434	6.23	0.775	-2.01223	530	1	-0.17	0	10.9434	5.7	1.9	4.5	5.3	6.2	4.9	2.6	6	7.9	10.9	4.7	4.3	4.3	2.8	3.4	7.7	4.2	6	2.6	3.8	89.3962
O75800	-0.332273	3.64	0.399	0.478589	440	1	-1.62	0	14.5455	6.8	3.4	3.6	10	3	4.5	3.4	2.7	5.2	14.5	1.8	2.5	4.8	6.8	5.9	6.1	4.3	6.4	2.3	1.8	92.6364
O75807	-0.997923	80.86	0.512	4.60893	674	12	1.35	0	39.911	11.6	1.2	5.9	14.7	1.8	7.4	1.6	0.9	4.2	6.4	0.4	0.6	10.8	3.3	7	9.3	5	3.9	2.8	1.2	51.1128
O75808	-0.280755	34.35	0.187	0.026121	1086	12	3.65	0	23.5727	10	4.2	3.7	7.2	3.1	8.3	2.9	1.8	2.6	9.3	1.1	2.1	9.3	3.8	7.2	8.2	4.6	7.3	2.1	1.1	74.5856
O75815	-0.55103	47.15	1.21	1.58737	825	44	1.82	0	0	6.8	2.1	4.5	7.5	3.3	5.6	2.7	3.5	5.3	10.4	3	4	7.9	5.1	7.2	8.5	4.8	5	1.1	1.8	75.5636
O75817	-0.444286	9.29	7.02	1.94289	140	6	0.52	1	0	10	1.4	4.3	7.9	2.1	5.7	1.4	6.4	3.6	10.7	1.4	6.4	5.7	4.3	10.7	4.3	5.7	5.7	0	2.1	93.4286
O75818	-0.282369	1.38	3.71	-0.773484	363	7	-0.28	0	0	3.9	3	3.9	7.7	5.5	4.7	4.1	4.7	6.6	12.4	1.9	5.5	5.5	3	3.3	7.7	5.2	5.2	1.7	4.4	85.6474
O75820	-0.93131	6.55	0.503	1.4964	626	10	0.03	1	12.6198	2.1	5.9	2.7	9.6	4.6	5.9	6.7	5.6	8.5	5.4	1	2.9	4.2	7.2	7.2	8.1	5.4	3.8	0.6	2.6	56.1821
O75821	-0.808125	37.5	128	2.46932	320	21	-0.05	1	0	5.9	1.6	7.2	8.8	3.8	7.5	0.9	4.7	9.1	6.6	1.6	4.1	7.2	3.1	5.9	6.6	8.1	4.7	1.2	1.6	63.4062
O75822	-1.00698	52.71	86.9	3.47393	258	16	3.09	1	39.1473	7.8	0.8	11.6	12.8	2.3	7.4	0	3.5	14.7	7.4	1.6	1.9	2.7	3.9	3.1	5	3.1	6.2	1.2	3.1	68.062
O75828	-0.307942	1.08	41.2	1.39364	277	10	-0.05	0	0	7.9	2.5	7.2	6.9	3.6	6.1	1.8	3.6	5.1	10.8	2.5	4.7	4.7	4.3	7.6	5.4	4.7	8.7	0.7	1.1	89.3863
O75829	-0.300599	26.35	0.252	-0.216893	334	2	1.81	0	0	6.3	3.3	4.2	6.6	3.3	8.1	1.8	6.6	6	6.3	2.4	4.5	7.2	3.6	5.1	7.5	4.2	7.5	1.8	3.9	78.2036
O75830	-0.157778	6.91	2.88	-0.563613	405	2	0.06	0	7.65432	5.2	0.7	4.7	8.9	7.7	5.4	1.2	7.4	8.1	10.1	2.7	3.5	2.2	6.7	2.2	8.4	5.7	5.7	1	2.5	90.0247
O75832	-0.236283	1.77	111	1.24253	226	4	-1.58	0	0	12.4	2.2	4.9	8.4	0.4	8	4	4.9	7.1	11.9	2.7	5.3	2.7	3.1	3.1	5.3	4.4	5.8	0.9	2.7	94.646
O75838	-0.26631	2.14	0.221	1.11204	187	2	-0.68	0	8.55615	5.9	2.1	9.6	10.2	8.6	3.2	1.6	6.4	7	10.2	3.2	5.3	4.3	2.1	3.7	4.3	4.3	5.3	0	2.7	86.0428
O75840	-0.395364	58.28	0.173	1.38802	302	8	-0.01	1	0	9.3	4.3	4.6	6.6	3	4.6	4.3	2	6.3	11.3	0.7	1.7	4.6	4.3	6	10.9	6.6	5.6	1	2.3	77.2517
O75841	0.147692	1.54	0.308	-3.30227	260	1	1.1	0	0	6.5	5.4	5	3.5	6.9	7.3	1.2	6.9	3.5	9.6	3.1	7.3	3.8	4.2	3.1	4.6	4.6	5.4	3.8	4.2	86.6538
O75843	-0.0494268	12.48	12.3	-0.64801	785	16	0.45	0	15.2866	8.9	1.9	4.8	6.6	2.3	4.7	3.7	5	2.9	15.3	2	3.2	5.9	5.5	6.8	6.2	5	7.1	0.4	1.8	108.599
O75844	0.118737	11.16	32.4	-3.55434	475	11	-0.12	1	8.84211	5.3	1.1	3.4	6.9	8.8	6.3	1.9	6.1	7.4	13.7	2.1	2.9	3.6	3.4	2.9	6.9	5.1	5.5	2.3	4.4	98.3158
O75845	0.0337793	9.7	0.23	-3.71801	299	1	1.94	0	23.0769	3.7	0.7	4.7	3.7	10	5.7	6.4	8	5	10.4	1.7	3	5.7	2.7	3.7	6	4.7	5.7	2	6.7	91.9064
O75864	-0.519971	37.77	2	2.5581	691	10	3.42	0	10.5644	8.7	1.7	5.2	9.6	1.9	6.7	2.2	2.7	4.8	12.9	1.6	4.2	10.6	3.9	5.2	7.8	4.6	4.3	0.4	1	82.2287
O75871	-0.0213115	15.57	0.009	-0.83857	244	4	0.45	0	0	11.1	1.2	3.7	3.7	2	8.6	3.3	6.1	1.6	10.2	0.4	3.3	8.6	4.5	4.1	8.2	7.8	6.1	1.2	4.1	92.8279
O75874	-0.391787	0.72	246	0.734018	414	20	0.2	1	0	7.5	1.2	6	7	4.1	8	2.2	7.2	8.9	6.5	3.4	4.1	2.9	4.3	3.6	5.3	5.8	6	1.7	4.1	78.6957
O75879	-0.313106	9.34	6.97	0.953024	557	7	-0.2	0	0	7.7	1.4	3.6	7	2.7	6.5	2.5	5	5.7	11.7	2.3	4.5	5	6.8	6.1	7.4	4.5	7	0.9	1.6	93.1418
O75880	-0.441528	31.89	27.3	1.19829	301	10	0.02	0	0	6.6	1.3	5.3	7	3.7	9.3	2	5.3	7	9.3	2.3	0.7	8.6	3	7.3	4.7	6	5	2	3.7	78.1063
O75881	-0.0409091	7.51	0.206	-1.26192	506	9	-0.54	0	21.5415	4.5	1.8	5.5	6.3	7.1	5.7	2	6.5	7.5	14.4	2.2	2.4	4.2	4	4.9	6.5	4.9	4.7	1	3.8	100
O75882	-0.278446	10.22	205	-2.80848	1429	13	4.45	0	12.2463	7.1	6.2	4.5	4.5	4.1	7.3	2.9	3.8	4.3	7.8	2.1	6.1	5.2	3.6	4.8	8.4	5.5	5.7	2.2	3.6	68.8803
O75884	-0.325269	1.08	18.5	0.545182	186	2	-0.09	0	0	7.5	2.2	4.8	8.1	4.3	7	3.8	6.5	7	6.5	2.2	2.7	5.9	3.2	3.2	5.4	7	6.5	3.2	3.2	76.5591
O75886	-0.508952	48.38	8.31	1.14477	525	10	2.01	0	0	7.2	1.3	6.1	7.4	2.3	4.2	2.9	4.8	6.7	8.2	2.7	6.1	6.3	6.5	1.7	8.4	6.3	7.2	0.8	3	78.7429
O75888	-0.3208	35.6	0.331667	0.123669	250	4	0.95	0	0	8.4	1.2	3.2	4.4	2.8	9.6	2.4	2.4	3.2	11.2	2.4	2.4	6.4	8	7.6	8.8	4	7.2	2	2.4	82.32
O75891	-0.112528	3.33	12	-0.297613	902	12	0.56	0	8.86918	8.6	1.7	6	7	4.9	8.9	2.2	5.3	6.5	8.9	2.2	3.7	4.5	3.3	4.3	4.9	5.1	8.9	1.2	1.9	89.7118
O75897	-0.606291	3.64	0.139	0.759835	302	1	-0.98	0	10.596	5.3	1	7	6.3	6	4.3	4.6	5.6	10.6	7.6	4	3.6	6	3.6	3.3	4.6	5.6	4.3	3	3.6	69.4371
O75899	-0.149734	17.11	0.161	-2.67521	941	12	0.61	0	7.22635	5.7	1.9	4.3	4.9	4.1	6.2	1.9	7.2	5.7	10.5	2.8	4.9	6.3	4.5	5	7	6.4	5.8	1.6	3.3	91.9022
O75900	-0.183077	8.46	0.344	-0.105203	390	4	0.37	0	10.5128	10.3	2.8	3.6	3.8	4.4	7.7	4.1	2.1	2.6	11.8	1.3	1.8	7.9	2.1	10.5	5.1	5.1	6.7	3.1	3.3	83.5897
O75901	-0.678391	43.22	0.195	1.83544	435	1	0.5	0	20.9195	4.8	1.6	6.7	11.5	2.5	3.4	2.5	5.3	9.4	10.8	2.1	4.4	3.4	4.6	4.4	8	5.1	5.7	1.4	2.3	84.2529
O75907	0.155943	15.98	2.54	-3.37899	488	7	1.77	0	20.6967	11.1	1.6	3.7	3.5	6.4	6.1	2.5	4.7	3.1	11.7	2.9	3.9	5.3	2.9	7	6.8	2.7	7	3.3	4.1	95.2049
O75908	0.251341	14.18	0.328	-5.14649	522	1	-0.09	0	21.0728	8	2.7	2.5	4.4	6.9	6.5	2.7	3.8	1.3	14.2	3.4	1.9	5.7	4.8	7.5	5	4.8	6.9	2.9	4	98.2759
O75909	-0.691034	57.24	20.1	0.971406	580	10	4.09	0	29.1379	6.4	1.2	3.6	4.5	2.9	5	3.4	3.1	5.7	7.1	2.4	1.7	21.2	7.9	3.3	5.5	4.7	5.3	1.4	3.6	61.5517
O75911	0.132781	5.3	3.43	-0.695532	302	0	-0.6	0	0	8.6	2.3	3	6	4.3	7	2.3	5	5.3	12.9	3.6	3.3	4	3.6	6	4.3	7.6	7.9	1.3	1.7	101.391
O75912	-0.3923	29.58	0.075	0.786141	1065	7	2.19	0	0	9.3	2.9	5.4	6.1	3.2	8	3.2	4	5.7	9.6	2.2	3.6	6.2	4.7	6.2	7.7	3	5.7	1.3	2	79.0047
O75914	-0.60161	35.6	6.87	2.27838	559	21	0.94	0	0	6.6	1.1	5.2	9.7	2.3	5.2	1.6	5.4	7.7	8.6	2.9	5.4	7.9	3.6	4.5	7.9	5.5	5.7	0.7	2.7	77.6386
O75915	0.348936	1.06	361	-2.96346	188	3	-0.18	0	6.38298	5.3	0	4.8	3.2	8	6.4	1.1	6.9	5.3	11.2	6.4	5.9	3.7	1.6	6.4	4.8	3.7	10.6	1.6	3.2	106.702
O75916	-0.587834	37.09	0.081	1.01388	674	12	2.12	0	0	6.5	1.8	4.6	5.9	3.6	5.2	1.5	4.6	7.4	7.6	3.4	3.4	7.3	5.5	7	8.6	4.7	5.5	1.9	4	69.8961
O75923	-0.400144	18.61	6.92	-1.1137	2080	33	2.58	0	13.6058	5.8	1.8	6.6	7.6	5	6.1	1.9	5	5.9	10.2	2	3	7.4	4.2	5.9	5.7	4.9	5.9	2	3.3	82.0769
O75925	-0.293088	45.78	1.27	0.345458	651	32	1.27	1	12.4424	5.5	2.6	5.4	4.5	2.9	3.7	3.5	4.8	5.4	11.7	2.3	3.5	8	4.5	4.1	12.4	7.1	5.2	0.5	2.5	84.7773
O75928	-0.199195	42.51	0.756	0.458314	621	16	0.84	1	14.1707	4.3	2.7	5.5	4.8	3.1	3.9	1.8	5.6	5.6	10.3	2.7	2.3	9	4	4.8	14.2	5.8	6.9	0.5	2.1	86.6023
O75934	-0.703556	9.33	52.2	1.7352	225	10	-1.6	0	0	8.9	0.9	3.1	11.6	1.8	4	2.7	4.9	5.3	8.9	3.6	7.1	3.1	7.6	6.2	4.9	3.6	5.8	1.8	4.4	79.3778
O75935	-0.205914	3.23	60.1	1.34487	186	3	-2.38	0	0	10.2	1.1	4.8	10.2	1.6	3.8	1.6	7	7	13.4	1.6	1.6	3.2	9.1	5.4	4.3	2.7	7.5	1.1	2.7	111.72
O75936	-0.396641	2.33	1.45	0.319368	387	1	-0.14	0	0	5.9	2.3	8	5.7	5.4	5.7	2.8	4.9	7.5	9.6	1.6	3.9	3.4	4.7	5.2	5.2	4.9	7	2.3	4.1	82.6098
O75937	-1.29723	18.18	200	3.74143	253	12	0.9	0	28.4585	6.3	0	5.5	14.6	4.3	4.3	1.2	3.6	13.8	5.9	2	3.2	3.2	6.7	8.3	4.7	4.3	5.1	0.8	2	58.2213
O75940	-0.915966	8.82	48.9	2.72555	238	18	1.04	1	12.605	8.4	1.3	5	10.5	1.7	5.9	0.8	3.4	12.6	7.6	2.5	4.2	3.4	8	2.9	7.6	5	5	1.3	2.9	65.6303
O75943	-0.471366	30.84	0.977	1.19435	681	16	2.05	1	0	4.6	1.6	5.4	7.3	4.7	5.9	2.3	5.9	6.9	11	2.2	4.6	5.6	4.7	5.4	9.5	4.8	4.1	1	2.3	82.3348
O75947	-0.554037	3.73	409	1.8693	161	8	-0.72	0	12.4224	11.8	0.6	6.2	10.6	3.1	1.2	0.6	5.6	12.4	8.1	2.5	5	6.8	3.1	1.9	4.3	3.7	5.6	3.1	3.7	81.3043
O75949	-0.352119	38.05	0.064	-0.306002	473	1	1.71	0	15.6448	8.2	5.7	4.2	5.7	3.4	6.6	3.4	1.3	4.9	11.4	1.5	1.5	9.9	4	6.3	7.4	4.7	4.7	2.3	3	71.3559
O75951	-0.0108108	9.46	0.008	-0.21096	148	0	-0.3	0	0	6.1	5.4	6.1	4.1	4.7	6.1	2.7	4.7	3.4	15.5	1.4	7.4	1.4	3.4	4.7	9.5	1.4	4.1	3.4	4.7	96.8919
O75952	-0.41501	82.35	0.546	1.15957	493	25	0.95	0	21.9067	7.7	0.6	4.1	11.2	1.4	4.9	1.2	3.4	6.7	6.3	2.4	2.6	8.5	5.7	1	11.4	7.7	10.8	0.2	2.2	76.856
O75953	-0.679598	17.53	0.418	1.7089	348	2	4.96	0	0	4.6	1.1	7.8	6	6	9.5	2.9	5.7	8.3	6.6	1.1	2.9	8.6	1.7	7.8	5.2	5.5	5.2	0.3	3.2	67.7874
O75954	0.523431	0.84	2.54	-3.63277	239	0	2.8	0	5.85774	5.4	5.9	3.3	3.8	5.9	8.8	1.7	6.7	5.4	14.2	5	5.9	2.1	2.1	2.5	3.8	5.4	6.7	2.5	2.9	106.444
O75955	-0.338407	1.41	119	0.750145	427	22	-0.44	0	22.0141	13.6	0.9	3	10.5	2.1	4.9	1.6	5.6	7	7.5	3.3	1.9	2.3	8.4	6.6	5.4	4.4	8.4	0	2.3	89.1803
O75962	-0.513723	41.52	1.97	0.667324	3097	85	5.24	0	9.26703	6.6	1.7	5.9	8.1	3.2	6.2	3.4	4.8	6.5	10.2	2.2	3.4	4.4	5.7	5.4	9.3	4.4	5.7	1.1	2	81.4336
O75969	-0.559906	47.25	0.109	1.3569	853	17	1.32	0	0	7.2	1.5	6.1	7.7	3.5	5.9	1.8	3.5	7.9	8.2	2.9	4.3	5.7	4.6	4.6	9.3	5.3	6.7	0.8	2.6	72.2509
O75970	-0.239469	48.07	1.36	0.375991	2070	51	1.73	0	26.4251	7	1.1	5.4	8	2.1	9.1	2.2	7.3	4.7	9.5	1.8	3.9	5.2	4.5	4.1	10	5.5	6.7	0.4	1.4	92.0435
O75973	-0.324031	30.23	0.52	0.312106	258	1	4.24	0	17.0543	7.8	1.6	6.2	3.1	3.1	17.1	1.9	3.1	4.3	6.6	1.9	3.9	11.2	2.3	2.7	6.2	5.4	6.6	0.4	4.7	64.6512
O75976	-0.395507	9.86	4.74	-0.589454	1380	29	2.5	0	5.65217	6.2	1.4	5.4	6.8	3.5	7.9	3.3	4.9	4.6	9	2	5.7	5.7	3	4.9	8	6.3	6.7	1.1	3.8	79.8261
O75995	-0.770526	66.58	81	2.97736	380	44	2.44	0	0	6.3	0.8	5.8	11.1	2.9	7.9	2.4	2.4	7.9	10	2.1	2.1	8.2	3.4	4.7	10.8	5	4.2	0.5	1.6	66.7632
O76000	0.618211	4.15	0.124	-5.00532	313	2	0.14	0	20.7668	5.8	3.8	2.6	3.2	7.3	4.8	2.2	8.3	4.8	13.4	5.1	3.5	4.2	1.9	3.2	8	5.4	6.7	1.6	4.2	109.936
O76001	0.707395	3.54	0.255	-5.38401	311	0	-0.7	0	0	5.1	3.2	2.6	2.3	6.8	5.5	3.5	6.4	1.9	14.8	3.5	3.5	4.5	2.6	3.2	8	6.4	10	1.6	4.5	116.817
O76002	0.753205	2.88	0.245	-5.35632	312	0	-0.74	0	15.7051	6.1	3.2	2.2	2.6	7.1	4.5	3.8	6.4	2.9	15.7	4.2	2.9	4.8	2.2	3.2	7.7	5.8	9.3	1.6	3.8	119.295
O76003	-0.256716	5.07	141	1.02497	335	9	-0.2	1	11.6418	8.4	1.5	3	11.6	4.5	6.3	2.1	4.2	8.7	11.9	2.4	3.3	5.1	4.5	2.7	6.9	3	6.6	1.2	2.4	90.2687
O76009	-0.583168	23.51	34.4	1.61042	404	5	1.87	0	23.7624	5.4	5.4	4	11.4	1.7	2.7	0.7	3.5	3	12.6	0.5	6.9	3.2	7.7	7.4	9.7	5.4	5.4	0.5	2.7	83.9851
O76011	-0.539679	25.23	108	1.24013	436	0	2.05	0	12.3853	5	5.7	3.4	10.8	1.6	2.8	1.4	4.6	4.1	12.4	0.7	6.7	3.7	7.8	6.2	9.9	5.5	4.8	0.5	2.5	85.2064
O76013	-0.372163	30.84	13.1	1.28833	467	5	2.69	0	0	6.4	4.3	3.9	10.7	2.1	5.1	1.1	5.1	3.6	10.9	1.3	3.9	4.3	6.9	6.6	8.8	5.4	6.4	0.6	2.6	87.6874
O76014	-0.435635	27.62	2.78	1.44761	449	10	1.71	0	5.34521	8	5.3	4	10.7	1.6	4.9	2.2	4	4.2	11.8	2	4.9	4.2	6.9	5.1	8	5.3	4.5	0.2	2	82.6058
O76015	-0.434649	28.95	3.25	1.47866	456	8	1.59	0	6.14035	7.7	6.1	4.2	10.7	1.3	4.6	1.8	4.4	3.7	11.8	1.8	4.8	4.8	7	5.5	7.9	5.9	3.9	0.2	1.8	82.4123
O76021	-0.898776	49.39	140	3.15065	490	47	0.96	1	15.9184	6.9	0.8	3.1	8.2	2.7	3.9	1.8	4.5	15.9	8.2	0.6	3.5	6.7	3.3	6.1	10.4	6.5	5.1	0.8	1	71.0816
O76024	0.0517978	17.75	7.29	-4.30452	890	13	0.77	0	5.8427	8.1	2.2	3.9	6.3	5.8	5.3	2	4.5	5.1	12.2	2.1	2.6	5.6	3	5.8	7.3	5.4	7.6	2	2.9	95.5393
O76027	-0.242899	7.83	1.45	0.869359	345	2	-0.67	0	8.69565	10.1	1.2	6.1	6.4	3.2	5.2	1.4	4.9	3.8	13.3	1.4	2.9	2.6	8.7	7	7.2	6.1	5.8	0.6	2	98.1739
O76031	-0.396524	32.54	28.8	1.27278	633	18	1.27	0	0	7.7	2.1	4.7	8.2	3	8.4	1.7	5.5	7.4	9.3	1.1	3.9	4.6	4.9	5.7	7.6	4.6	7.1	0.2	2.2	86.2717
O76036	-0.258224	15.13	0.345	-0.157627	304	1	1.54	0	0	5.9	2.3	3.6	6.2	4.3	6.2	2.6	2.6	3.9	11.5	2.3	3	6.6	4.3	6.2	6.9	8.2	6.9	2.6	3.6	81.1184
O76038	-0.456884	2.9	2.45	1.5354	276	6	-0.55	0	9.78261	6.5	1.1	9.8	8.3	6.9	5.4	1.8	4.3	8.7	12.3	4.7	3.3	1.8	3.6	6.2	5.4	3.3	3.6	1.1	1.8	82.029
O76039	-0.848738	60.87	0.401	2.40957	1030	45	3.15	0	16.7961	4.8	1.2	3.9	6.2	3.2	5.5	4.2	3	6.7	9.4	1.7	5.1	7.8	5.1	7	12.6	5.4	4	0.5	2.6	64.767
O76041	-0.936982	13.51	3.84	2.76631	1014	16	1.13	0	25.5424	6	0.4	6.4	9.6	2.4	4.5	3.1	5.4	11.3	5.4	3.6	4.1	3.9	5.2	4.8	8.3	4.6	5.9	0.3	4.6	65.4832
O76050	-0.118815	22.65	0.671	0.060457	574	0	1.69	0	0	8.7	4	5.2	3.1	3.5	8	3.7	4.4	3.5	11	1	2.6	8.7	2.8	7.1	9.2	4.9	6.1	1.2	1.2	86.1847
O76054	-0.42928	3.72	6.76	0.747573	403	6	-0.09	0	0	4.5	2.2	6.2	6.9	4.2	7.2	2	4.7	8.4	10.4	2.7	3	6	5	5.2	5	4	6.7	1.5	4.2	82.928
O76061	-0.51755	44.37	5.61	0.9419	302	6	0.93	0	0	8.3	5	4	7.9	3.3	8.6	5	4	4.6	8.6	1.7	3.3	5	6	7	7.3	4.3	4.6	0.7	1	70.7947
O76062	0.400239	1.44	4.82	-3.31362	418	0	0.07	0	18.6603	10.8	1.4	2.4	3.6	5.5	8.6	1.9	3.3	2.4	18.7	3.3	2.6	7.7	3.1	5.3	4.3	3.6	4.5	2.6	4.3	109.785
O76064	-0.674227	36.7	0.716	1.5778	485	2	1.44	0	20.6186	5.2	3.1	3.1	11.1	2.3	5.4	1.9	4.9	9.5	9.3	3.1	5.2	3.5	7.8	4.7	6.8	3.7	6	1.4	2.1	77.9794
O76071	-0.412979	0.29	14.5	0.401752	339	6	0.57	0	10.3245	8	5.3	8	6.5	2.4	6.2	3.2	2.7	3.5	8	0.3	2.9	4.4	4.1	4.7	9.7	5.6	7.4	5	2.1	70.767
O76074	-0.3944	13.26	28.1	-0.401451	875	6	0.17	0	0	7	2.9	5.6	8.1	4.8	3.9	3	6.3	6.6	9.8	2.5	5.4	3.3	6.5	4.7	6.4	4.9	5.3	1	2.1	85.0629
O76075	-0.599408	4.14	1.87	1.3037	338	4	0.45	1	9.76331	4.7	3.3	4.1	7.4	4.1	5.9	2.1	3.8	5.3	11.2	1.2	2.7	5	6.5	9.8	8.9	3.8	4.7	1.5	3.8	77.3077
O76076	-0.198	9.6	26.8	0.771638	250	0	1.83	0	23.6	4	11.6	3.2	4.4	2.4	11.2	1.6	0.4	1.2	11.2	0.8	1.6	12	4.8	8.8	7.2	5.2	6	2	0.4	66.64
O76080	-0.747418	47.42	4.94	1.74525	213	19	1.67	1	0	6.6	5.2	2.8	6.6	1.9	6.6	1.4	2.3	7	3.8	3.8	5.6	8	5.6	5.6	11.3	7.5	6.1	0	2.3	48.0751
O76081	-0.521649	25.52	0.063	1.21126	388	7	2.11	0	0	9	2.8	4.4	8	4.1	4.1	2.1	3.9	3.4	10.6	3.1	3.4	10.1	5.2	8.5	9	3.1	2.6	1.3	1.5	72.7835
O76082	0.432136	7.18	0.148	-5.21604	557	7	-0.59	0	7.18133	5.9	1.3	3.9	3.8	7.2	7	1.3	5.9	2.5	13.5	3.9	2.5	4.8	2.9	5.6	7.7	5.9	8.6	2.2	3.6	106.535
O76083	-0.462395	33.39	0.212	0.51652	593	10	1.09	0	0	5.9	3	5.9	9.1	4	3.4	2.2	6.1	6.1	8.6	4	4	5.7	3.7	7.3	6.6	4.9	5.6	1	2.9	79.258
O76090	-0.283248	35.56	0.135	-2.17833	585	8	-0.31	0	0	6	0.9	4.4	6.5	5.5	4.4	3.1	3.9	5	12.5	2.7	4.3	6.7	4.8	5.1	6.7	5.1	5.8	2.6	4.1	86.8376
O76093	-0.707246	24.64	0.173	0.691742	207	2	-0.09	0	0	4.3	2.9	3.9	5.8	4.3	6.8	2.4	2.9	9.7	8.2	1.9	2.9	4.3	5.8	9.2	5.3	6.8	7.2	0.5	4.8	68.6957
O76094	-0.642027	19.08	65	1.56821	671	30	0.95	1	18.6289	8.9	1.5	4.5	6.9	1.3	5.8	2.1	5.5	11.2	10	1.3	5.1	4	7.5	3.7	7.3	4.8	4.8	0.9	3	83.2191
O76095	-0.0109589	26.71	1.05	-0.239131	146	0	-0.19	0	7.53425	8.9	7.5	0.7	9.6	4.8	4.8	0.7	4.1	6.8	11	1.4	2.1	4.8	4.8	6.8	7.5	4.1	6.8	2.1	0.7	87.5342
O76096	-0.222069	17.24	3.78	0.008814	145	5	-0.01	0	0	4.1	5.5	4.8	4.1	4.8	4.8	2.8	2.8	6.9	11	2.1	4.8	4.8	4.8	5.5	5.5	9	8.3	1.4	2.1	81.931
O76099	0.735938	1.56	0.004	-5.15002	320	1	-0.21	0	19.0625	5.3	3.4	2.5	2.2	9.7	6.2	2.5	6.2	2.2	15	3.8	3.8	2.5	1.9	2.8	10	9.4	6.6	0.3	3.8	107.219
O76100	0.749838	2.59	0.9	-5.06528	309	1	-0.21	0	12.6214	6.1	3.2	1.9	1.9	7.4	5.2	3.9	7.1	3.2	14.2	5.2	4.5	3.6	2.6	1.3	9.1	6.5	8.1	0.6	4.2	112.913
O77932	-0.60202	9.34	0.618	0.62972	396	2	2.57	1	11.6162	6.3	2	5.1	5.8	4.8	6.8	2.3	0.5	3.5	9.6	2.3	2.8	11.6	4.3	7.6	7.1	5.3	5.6	2.5	4.3	61.8182
O94759	-0.221557	14.3	0.044	-3.078	1503	15	1.16	0	2.19561	6.5	1.9	5	6.6	4.7	5.8	3.1	4.9	5.7	11.5	2.1	3.4	5.3	4.9	5.9	5.7	5.1	7.2	2.2	2.6	91.4504
O94760	-0.132982	3.16	75.2	1.03418	285	6	-0.35	0	0	9.5	2.1	6.3	8.1	2.5	6.7	3.2	3.9	6.7	11.2	3.2	2.8	4.6	3.2	4.6	6.3	3.9	9.5	0	2.1	95.7895
O94762	-0.598991	38.65	1.26	1.77233	991	25	2.88	0	9.68718	9.7	3	4.4	7.7	3.6	7.6	2.6	2.4	7.4	8.2	1.2	2.3	7.4	4.5	6.8	8.3	4.2	5.4	0.8	2.4	66.8113
O94763	-0.833645	68.22	5.23	3.13014	535	41	3.1	0	9.53271	6.9	1.5	9.5	10.3	3.2	3.6	2.8	4.1	8	6.7	1.1	4.5	6.4	2.6	5.4	9	5.8	6.9	0.6	1.1	69.2523
O94766	-0.262985	11.64	12.3	0.059671	335	1	1.09	0	0	8.4	0.9	4.5	6.6	3	7.8	2.1	1.2	3.9	14	1.2	1.5	10.1	5.7	7.8	4.2	4.5	9	2.1	1.8	93.7015
O94768	-0.323118	11.56	1.65	0.753036	372	3	0.57	0	8.33333	4	2.7	5.4	8.9	3.8	4.3	2.7	8.3	4.8	10.2	2.2	5.1	4.3	4	5.1	9.9	5.4	4.8	0.8	3.2	90.4032
O94769	-0.6	31.9	1.58	1.53145	699	4	1.73	0	24.3205	3.3	2.3	4.3	10.7	3.3	5.4	2.3	6.7	5.3	11.6	1.9	6.9	6.6	4.4	6.3	8	3.7	3.7	0.3	3	85.4936
O94772	0.245	29.29	4.99	0.31836	140	2	0.56	0	7.85714	10.7	7.9	6.4	0.7	2.9	8.6	3.6	2.1	5	13.6	2.9	2.9	5.7	2.1	2.1	10.7	4.3	5	2.1	0.7	86.5
O94776	-0.527695	45.21	49.2	1.05068	668	37	1.62	1	0	9.7	1.9	4.2	5.4	2.8	4.6	1.6	3.9	6.4	9.7	2.4	4.5	7.2	5.4	8.1	7	5.8	4.9	1.2	3	77.1856
O94778	0.670115	9.58	0.013	-2.43794	261	0	0.14	0	25.2874	12.3	2.3	1.5	4.6	4.6	13	1.5	6.1	2.3	14.6	2.7	3.8	5	2.3	3.4	4.6	3.4	8	2.7	1.1	116.284
O94779	-0.309182	6.73	0.016	-0.655371	1100	11	1.15	0	11.3636	6.6	1.3	3.6	7.1	3	7.2	1.4	5.5	5	7.2	1.6	4.2	6.6	3.5	4.8	11.4	6.5	8	1.8	3.7	79.4727
O94782	-0.711847	58.6	0.798	1.94537	785	36	0.85	0	27.5159	3.6	2.3	4.3	11.3	3.3	5.6	1.4	4.7	9.7	9.6	1.3	6.5	4.8	4.2	3.4	9.9	5.5	5.5	0.5	2.5	75.0955
O94788	-0.131853	13.71	23.7	0.052651	518	10	0.52	0	0	9.5	1.5	4.4	7.1	5.4	9.1	1	6.9	6	6.9	2.5	4.4	5.2	4.1	4.6	5.4	5	7.1	1.2	2.5	84.3822
O94804	-0.948554	35.64	47	3.36829	968	45	1.52	0	28.9256	6.6	1.2	5.3	12	2.5	3.4	2.4	3.6	9.4	10.2	3.2	3.6	4.5	7.5	7.2	6.8	3.8	4.2	0.7	1.7	72.8822
O94805	-0.28615	3.76	1.6	0.611727	426	3	1.05	0	0	6.6	1.9	4.9	7.3	3.8	9.6	2.3	5.4	5.9	8	3.8	3.8	6.1	4	3.8	6.6	5.4	6.6	1.4	3.1	77.8169
O94806	-0.360674	31.46	1.29	-0.022212	890	40	1.47	0	0	4.5	2.7	5.6	6.4	3.9	5.3	3.1	5.8	5.5	8.4	2.9	4.6	6.4	3.7	5.6	9.4	4.7	7.2	1.2	2.8	81
O94808	-0.176246	3.67	6.19	-0.279075	682	11	-0.46	0	7.18475	6.6	2.1	5.3	7.6	4.4	6	2.8	7.2	6.2	10	2.5	3.2	2.8	3.8	6.6	6.5	6.2	7.3	0.1	2.9	94.7654
O94810	-0.405353	12.21	0.117	0.610189	467	2	0.67	0	0	9.2	1.9	5.4	5.8	3.4	6.2	2.8	2.4	4.7	9.9	3.2	1.7	8.4	4.5	8.4	5.4	3.9	7.1	2.1	3.9	77.3019
O94811	-0.755251	24.66	13.5	2.55104	219	15	1.86	0	11.8721	10.5	1.4	6.4	7.8	3.7	9.6	2.3	3.7	11.9	4.6	0.9	1.4	4.1	2.3	6.8	8.7	5.9	6.4	0.5	1.4	61.0959
O94812	-0.225358	16.26	0.11	-0.394069	1187	4	0.97	0	23.7574	9.6	1.9	5.4	7.3	3.7	6.4	2.9	2.2	4	14.2	1.5	1.9	5.7	5	6.9	7	4.4	6.5	1.5	2	92.1567
O94813	-0.323414	3.99	0.375	-0.109051	1529	5	3.27	0	13.8653	4.7	6.9	5.7	5.2	3.6	7.1	2.3	5.2	5.6	11.1	1	6.9	5.2	4.3	5.1	6.9	5.4	4.3	0.7	2.7	80.9941
O94817	-0.235	33.57	2.12	1.31094	140	2	-0.65	0	0	7.9	1.4	5	7.9	3.6	7.9	0.7	5.7	8.6	8.6	1.4	0.7	7.9	5	1.4	7.9	8.6	6.4	1.4	2.1	82.2143
O94818	-0.900157	62.7	0.219	2.82472	638	12	1.99	0	20.2194	6	1.1	7.7	8	2.5	6.6	2.2	3.3	6	7.7	3.3	5.2	3.6	5.2	6.9	12.5	4.5	4.2	0.3	3.3	61.0188
O94819	-0.264205	31.94	1.76	1.40582	623	10	2.35	0	45.2648	15.7	2.9	4.3	7.4	2.6	10.6	1.4	0.6	0.8	10	0.6	0.8	9.3	3	9.6	7.9	1.8	6.3	1.3	3	75.2006
O94822	-0.110136	15.35	2.27	-2.57765	1766	18	0.77	0	22.1404	5.2	2.7	4.7	7.6	4.5	3.6	2	5.4	7.6	14.6	2	3.9	4.2	4	3.3	9.5	5.4	5.6	1.7	2.7	99.145
O94823	-0.202259	29.64	0.07	-3.44887	1461	8	1.43	0	0	5.4	2.9	5.2	6	5	5.3	2.3	5.5	4.7	10.7	2.7	3.6	4.5	4.7	5.9	9	6.6	5.7	1.4	2.8	85.6126
O94826	-0.546217	12.17	103	1.90971	608	16	0.17	0	21.875	12.3	2	5.8	8.1	2.8	6.7	1.3	4.1	9.5	9.5	2.8	4.1	3.9	6.2	4.1	5.1	3.1	3.8	0.7	3.9	76.5461
O94827	-0.546704	49.81	0.654	2.22852	1062	23	3.43	0	0	7.1	2.6	5.3	8.9	2.9	6.8	2.4	2.4	5.1	11.5	2	1.7	7.7	4.1	7.5	10	4.6	4.8	0.8	1.8	75.339
O94829	0.0685358	3.53	1.61	-2.71733	963	8	-0.72	0	21.1838	8.1	2.2	4.9	6.5	4.4	3.9	2.4	4.9	4.2	14	2.4	2.5	5.6	7.2	3.7	7.2	3.9	7.9	1.5	2.7	104.694
O94830	-0.431786	31.36	1.76	0.211142	711	8	1.89	0	0	3.4	1.7	6.2	7.7	4.8	5.9	2.4	5.9	5.3	9.1	2.3	4.4	6.5	4.6	5.1	8.4	4.8	6.6	1.3	3.7	81.2377
O94832	-0.380318	4.08	12.8	-0.625891	1006	27	0.03	0	15.3082	5.9	1.4	5.3	6.1	5.2	5.1	2.6	6.8	8.5	8.6	2.4	5.1	3.4	4.4	6.7	5.6	4.8	7.5	0.8	4.2	87.5746
O94842	-0.375362	84.22	4.98	1.06157	621	26	1.73	1	20.2899	7.6	1.1	4.7	5.3	1.9	5.8	1.4	3.9	4.3	7.6	3.2	2.9	11.9	8.4	2.4	10.5	7.4	7.7	0.5	1.4	74.5733
O94844	-0.340948	17.67	0.419	0.221292	696	7	0.67	0	0	7.9	2.9	5.5	7.8	4.2	4.3	3	4.7	6.2	9.8	2.6	4	5.6	4.3	6.2	6	3.6	7	1.7	2.7	84.9138
O94850	-0.893812	79.75	0.963	3.68881	711	7	3.04	1	45.1477	10.1	1.1	3.4	7.3	1.1	12.1	2	1.8	3.5	6.6	0.3	1.3	11.7	4.9	11.3	8.9	4.9	4.6	2.1	1	56.4979
O94851	-0.523665	41.9	2.53	0.483716	1124	12	1.32	0	0	7.1	2.3	4.3	7	4.9	5.9	3.1	3.3	6.7	9.9	1.7	5.1	5.8	4.3	6.4	7.9	5.3	5.4	1.2	2.5	74.2082
O94854	-0.260031	81.95	0.235	1.60643	1291	39	2.65	0	53.7568	13.4	1.3	4.6	12.9	2.7	4.2	1.9	2.6	2.8	7.4	1.1	2.4	11.3	2.6	2.2	9.7	7.5	8.6	0.6	0.3	77.3044
O94855	-0.242733	27.71	24.2	-1.16148	1032	10	4.4	0	17.4419	6.6	2.6	4.4	3.7	4.3	7.3	2.3	4.8	4.3	9.3	3.4	4.5	10.7	6.8	3.6	7.4	4.8	5.6	0.1	3.7	78.062
O94856	-0.527617	13.66	5.02	-0.776107	1347	7	1.61	0	13.9569	6.4	1.1	5.1	6.2	3.2	6.6	1.3	4.8	4.5	6.8	1.8	5.4	7.9	4.3	6.2	7.3	8.5	7.2	1.7	3.6	72.435
O94864	-0.571739	44.44	1.71	1.58931	414	12	1.98	0	0	5.8	1.7	5.3	9.2	3.4	4.8	3.4	4.1	4.3	9.2	2.4	3.6	8.7	6	4.6	10.9	3.9	5.8	1	1.9	74.4203
O94868	-0.762432	41.35	0.969	2.05414	740	24	1.33	0	0	7.6	1.2	5.8	9.6	3	3.4	2.3	3.4	7	8.9	2	4.6	5.4	6.4	5.8	8.8	4.9	5.8	1.1	3.1	72.3784
O94874	-0.375063	16.37	59.4	1.05288	794	29	0.34	0	6.67506	6.5	1	6.4	8.2	3.9	4.8	2.1	6.7	8.2	10.6	1.6	3.4	2.1	5.7	5.7	8.2	5.5	7.1	0.4	1.9	94.2947
O94875	-0.923727	70.91	16.4	2.9182	1100	71	3.21	1	26	4.8	1.8	6.6	6.4	3.1	5.1	4	3.9	6.3	6.2	1.9	3.4	9.4	3.6	7.6	12.6	4.5	4.4	0.8	3.5	56.8273
O94876	-0.564319	58.35	1.16	1.24909	653	18	3.1	0	8.26953	9.5	1.1	4.6	8.4	2.9	5.5	2.5	4.7	6.1	8.6	2.3	3.7	3.8	8.3	5.7	9.6	5.4	5.7	0.3	1.4	77.8867
O94880	-1.00518	56.53	3.87	4.04515	888	59	4.5	0	28.3784	6.5	3.6	7.7	11.4	1.7	5.1	1.5	3.4	9.3	7.2	2	4.5	4.8	4.1	6.3	9.3	4.4	4.2	1	2	59.8986
O94885	-0.81676	65.84	2.8	3.60887	1247	66	2.3	0	20.6897	5	1.5	6	8.9	2.2	7.8	1.9	2.6	7.5	8.9	2.2	2.6	9.5	3.8	5.8	11.2	5.4	4.7	0.7	1.8	63.4964
O94886	0.174102	17.22	1.12	-6.13678	807	13	0.1	0	13.7546	6.4	3.2	3.8	4.8	7.1	4.7	2.2	6.7	4.3	12.9	2.2	3.3	4.6	4.7	4.2	7.1	6.4	5.3	2	3.8	98.2528
O94887	-0.414421	29.98	1.88	-0.288844	1054	42	1.06	0	0	6	1.5	4.3	7	4.7	6.1	3.4	3.7	6.3	11.7	2	2.1	6.1	5.1	6.6	7.7	5.7	5.6	1.2	3.2	82.1537
O94888	-0.643354	35.58	39.2	1.93525	489	21	0.5	0	0	6.3	1.4	5.7	10.4	4.3	6.5	2.9	4.7	5.3	8.8	1.8	3.5	5.7	6.3	5.7	8	5.1	5.1	0.8	1.4	73.8037
O94889	-0.10453	1.74	0.285	-0.745161	574	5	0.9	0	0	7.5	3.8	5.6	6.4	3.5	7.8	3.1	3.7	2.3	9.2	4	3.5	3.8	3.5	6.3	8.4	4.2	8.5	1.2	3.7	82.5261
O94892	-0.797546	3.07	0.334	1.31246	652	29	0.66	1	21.9325	2	5.5	1.7	9.2	4.3	7.8	6.6	4.8	9.8	6.3	2.1	4.8	2.9	4.3	5.4	7.5	7.2	4.3	0.5	3.1	57.5153
O94898	-0.231643	24.79	0.255	-1.02986	1065	9	1.34	0	6.29108	6.1	2.3	4.9	6.5	3.4	5.4	2.6	6.2	3.4	12.3	2.3	6.3	5.3	4.6	4.9	8.9	6.1	4.6	1.4	2.4	91.5869
O94900	-0.725095	76.24	0.65	1.75318	526	16	2.08	1	26.4259	6.5	1.1	4.4	3.6	1.7	5.7	3.8	3	5.3	7	4.8	5.7	13.3	8.4	2.3	10.3	4.6	4.6	0.4	3.6	58.9924
O94901	-0.291379	32.64	4.76	-1.08346	812	25	1.28	0	0	7.8	1.7	5.2	5.4	4.1	7.5	3.2	3.1	4.1	10.6	2	2.5	4.2	6.4	5.9	9.2	5.9	7.1	2.1	2.1	81.7857
O94903	-0.3	12	88.4	1.313	275	12	0.09	0	0	8	1.8	4	7.6	2.9	6.5	2.9	4.7	6.9	9.5	3.3	4.7	6.2	5.1	4.7	7.3	3.3	8.4	1.1	1.1	87.5636
O94905	-0.162537	16.81	52.7	0.331981	339	8	0.26	0	0	10.3	1.2	4.1	9.7	4.4	4.7	1.8	6.5	9.4	8.8	2.9	3.8	2.9	4.4	2.1	5.6	5.6	7.4	0	4.1	91.5339
O94906	-0.642508	14.56	49.8	2.42309	941	28	5.94	1	18.5972	10.5	1.5	5.5	9.4	2.1	5.3	2.1	4.5	7.5	9.1	2.6	4	5	3.9	8.1	4.7	4.5	5.2	2.3	2.1	78.6716
O94907	-0.431579	45.49	0.699	1.22839	266	8	1.71	0	7.5188	8.6	7.5	3.4	4.5	1.9	10.9	4.9	3.8	4.9	6.8	2.3	4.1	4.5	3.8	6.8	8.6	4.9	4.1	0.4	3.4	61.6917
O94910	-0.229104	33.31	0.451	-3.15131	1474	32	2.82	0	9.76934	7.7	2.4	4.1	5.8	3.7	7.2	1.8	3.8	3.3	9.8	1.7	5.4	7.8	3.1	5.8	7.4	6.2	7.3	1.4	4.3	81.8996
O94911	0.0553447	10.75	0.925	-5.62565	1581	4	0.53	0	25.6167	5.9	1.9	4.4	6.3	6.6	5.4	2	6.1	6.4	12.9	2.8	3.8	4	3.7	4	7.9	4.9	6.3	1.3	3.2	98.5389
O94913	-0.95119	83.92	3.82	3.33747	1555	0	5.1	0	25.7235	4.2	0.8	5	7.8	4.3	8.9	2.6	3.5	6.8	7.3	1.2	4.1	9.1	7.7	6.6	8.7	4.7	4.6	0.7	1.3	59.6206
O94915	-0.221374	37.27	8.19	-2.91091	3013	96	1.83	0	28.1447	5.6	1.6	5.4	7.4	3.8	4.1	2.9	5.8	4.8	12	2.5	4.3	4.6	4.4	4.7	10.3	5.6	6.2	1.1	2.8	93.5048
O94916	-0.631417	83.08	1.39	0.481134	1531	53	2.02	1	45.0686	5.6	1.1	2.9	5	3.2	5.4	1.8	3.8	3.3	6.7	3.6	6.1	7.4	14	2	14.1	7.3	5.6	0.1	1	62.6649
O94919	0.1358	13	18.8	-1.75921	500	6	1.05	0	0	8	2.6	4.6	5.8	5	7.4	0.6	5.6	4.8	11.2	2	2.8	4.8	4.2	4.6	7.6	5.4	8.4	1.4	3.2	97.88
O94921	-0.470362	30.92	1.25	0.829588	469	27	0.88	0	0	4.9	1.7	5.1	6.2	4.1	5.3	3.4	4.3	8.7	11.1	2.1	4.1	5.8	3.6	4.9	9	6	5.8	1.1	3	81.4712
O94923	-0.360454	11.83	0.921	-0.63269	617	9	1.33	0	5.02431	6.5	1	4.5	6	5.5	7	2.4	4.9	7.8	8.1	2.1	4.5	4.2	3.6	4.7	7.3	6	7.1	1.8	5	77.731
O94925	-0.256801	18.24	81.9	-0.229806	669	9	0.47	0	0	7.6	2.2	5.7	5.1	4.9	9.1	2.8	3	6.1	10	3.1	4.2	6	3.6	4.9	6.7	4.3	7	0.9	2.5	78.7145
O94927	-0.427488	9.79	1.73	1.18853	633	9	0.13	0	36.9668	8.1	1.7	3.5	8.1	0.8	5.5	3.3	2.5	3.5	17.4	1.4	0.9	5.1	10.4	9.2	6.2	4.6	5.4	2.1	0.5	101.264
O94929	-0.72489	51.54	1.7	1.05591	683	58	3.02	0	22.5476	4.5	4.4	4.7	5.9	3.1	6.4	4	4.8	5.7	6.1	1.9	2.6	6.3	4.1	7.6	11.9	5.1	3.7	0.9	6.3	57.9795
O94933	-0.256397	32.75	0.377	-0.590059	977	10	2.64	0	18.5261	4.8	2.1	3.7	6.3	4.3	7.5	3.3	4.8	4.8	13	1.6	5.5	7.8	3.5	5	7.5	5.1	5.3	1	3	89.7032
O94941	-0.198152	36.6	0.209	0.000647	541	9	1.97	0	0	6.5	3.7	3.1	5.7	3.5	6.1	3.3	4.8	4.4	10	1.8	2.8	9.2	5.5	4.6	9.8	6.5	6.5	0.9	1.1	82.902
O94952	-0.197134	5.1	0.894	-0.748095	628	5	0.95	1	6.21019	5.9	2.5	4.8	8	3.2	5.9	3.2	6.1	5.4	11.8	2.5	4	3.8	5.1	4.8	5.7	2.5	7.3	1.3	6.2	96.6879
O94953	-0.48823	36.68	1.04	0.605197	1096	23	1.56	0	8.4854	8.3	3	4.1	8.3	3.6	7.1	2.4	4.5	6.1	7.5	1.8	2.3	8.5	3.9	5.9	7.4	5.2	5.1	1.6	3.3	69.7354
O94955	-0.0366612	6.71	0.207	-1.84322	611	8	0.47	0	0	6.1	3.8	4.9	5.6	5.4	4.1	2.8	6.5	6.5	10.3	2.6	4.9	4.3	3.6	4.3	8	4.3	7.4	1	3.8	93.1588
O94956	0.310296	19.61	0.221	-4.18749	709	6	1.47	0	0	7.1	3.4	3.2	3.2	5.6	8.2	2.3	5.4	3.9	12.1	2.7	2.7	6.9	3.9	4.1	9.3	4.8	8.2	0.8	2.1	98.9845
O94964	-0.732256	93.04	1.51	3.04517	1423	54	2.15	0	18.2713	7.4	1.9	5.3	10.6	2.3	6	2	2	7	12.1	1.8	2.7	4.4	5.9	7.7	9.9	3.5	5	1.2	1.3	76.662
O94966	-0.433384	46.21	4.07	0.115313	1318	19	3.32	0	8.34598	7.8	2.5	5.2	7.6	3.8	6.6	2.4	2.4	4.6	9.6	1.2	2.7	8.3	4.7	6.4	8	5.1	7.5	1.4	2.1	76.3505
O94967	-0.41197	18.82	1.23	0.181706	919	36	2.8	0	0	5.8	2.9	5.8	6.5	3.5	7	3.2	4.2	5.2	10.4	2.4	4.4	5	5.8	4.2	9.6	5.2	5.3	1	2.6	78.5201
O94972	-0.612448	49.9	0.179	1.64087	964	18	1.65	0	9.6473	6.2	3	6.2	9.6	2.5	5.1	2.6	3.3	5	10.1	2.7	4.3	4.4	5.1	6	10.6	5.3	5.3	0.9	1.9	73.7552
O94973	-0.0865815	11.29	36.2	-1.16248	939	14	0.96	0	0	8.1	1.7	4.8	5.9	4.3	4.9	1.8	5.4	5.4	11.7	1.6	4.9	5.4	4.8	4.8	7.9	5.5	7.9	0.5	2.7	97.8168
O94979	-0.402623	37.38	102	0.168041	1220	34	3.15	0	16.2295	8.4	1.4	4.7	4.7	3.1	6.6	2.6	5	5.3	9	2.2	4.3	8.9	7.4	3.3	8.9	5.5	5	1.3	2.3	77.6066
O94983	-0.406572	67.72	0.433	0.803632	1202	15	3	1	10.7321	8.8	2	3.7	7.2	3.1	6.7	2.7	3.4	4	10.4	1.9	1.5	10.7	4.2	6.7	10.3	4.5	4.6	1.4	2.2	75.9484
O94985	-0.451988	16.31	8.51	-0.100435	981	4	1.25	0	18.7564	5.8	2.2	6.2	10.5	3.7	6.4	3.8	4.6	5	7.8	1.6	3.6	5.2	3.8	4.1	7	6.4	8.3	1.2	2.8	78.2569
O94986	-0.876667	89.36	0.19	2.96887	1710	52	1.49	0	30.7602	5.2	2.5	4.9	12.2	1.8	4.1	2.7	4.4	9.9	10.7	2	4.6	3.5	8.7	3.7	7.8	4.4	4.2	0.8	2	76.2573
O94988	-0.84174	65.79	0.643	3.12761	1023	34	1.69	0	17.7908	4.9	1.3	6.6	9.7	3.4	4.4	2.4	4.2	8.1	10.1	2	4.3	5.3	5.8	6.8	9.4	4.1	4.7	0.5	2.1	74.1544
O94989	-0.562545	48.28	0.538	1.77338	841	11	3.35	0	21.8787	7.7	2	3.8	6.7	2.4	6.2	2	1.7	2.1	11.8	1	2.1	12.7	5.7	9.2	9.9	5.7	5.1	1	1.3	74.9584
O94991	-0.317119	26.83	0.101	-0.810578	958	20	2.47	0	19.4154	4.2	2.3	4.6	5.5	2.9	5.5	3.3	4	4	13.8	1.5	5.6	8.4	4.7	5.3	8.5	4.8	6.5	0.5	4.2	92.1503
O94992	-1.27493	64.35	15.2	4.04803	359	19	2.29	0	14.2061	7	1.4	6.7	14.2	2.8	8.4	1.9	0.6	6.4	9.2	1.9	2.5	7.2	7	7.5	7.2	3.3	1.4	1.1	2.2	49.0251
O94993	-0.552855	72.11	0.071	1.74723	753	5	4.19	1	13.9442	8.4	0.9	2.8	6.8	3.1	5.4	3.1	3.1	3.7	8	1.2	3.1	13.9	5.3	5.6	10.2	6.1	6.1	0.5	2.8	69.0704
O95006	0.670662	5.68	0.201	-4.32249	317	4	-0.87	0	15.4574	7.3	3.2	2.5	3.2	5.4	4.1	3.2	7.9	3.5	15.5	2.8	2.5	2.8	3.2	3.8	9.8	6.6	8.5	1.3	3.2	122.997
O95007	0.913826	3.54	0.034	-6.29274	311	2	-0.27	0	19.6141	7.7	4.5	1.6	2.6	9	2.9	1.9	10.6	3.2	13.2	3.9	4.2	4.2	1.6	3.5	7.7	5.1	7.1	1	4.5	121.029
O95013	0.755128	2.24	0.395	-5.27785	312	3	-1.34	0	9.61538	5.8	2.9	3.2	1.6	9.6	4.8	3.2	6.7	4.2	13.8	3.5	2.6	4.2	1.9	3.2	9.3	5.4	9.6	1	3.5	113.654
O95025	-0.490991	12.61	0.121	0.024881	777	2	1.55	0	12.0978	4.8	2.6	7.5	5.8	4.5	5.7	3.1	6.6	7.3	9	2.1	3.5	4.2	4	6.3	6.6	5.8	4.9	1.3	4.6	79.6782
O95045	0.0176656	5.36	0.201	0.067705	317	1	0.13	0	0	5.7	4.1	6.9	5.7	5	7.3	3.2	7.3	5.4	10.4	3.8	3.5	3.8	1.9	6	5.4	5	6.9	0	2.8	94.7003
O95049	-0.71839	43.42	4.26	2.47312	919	0	3.74	0	17.1926	7	0.2	7.4	6.7	2.4	8.9	2.3	4.5	3.5	7.8	1.5	1.8	6.9	5.7	9.8	10.1	4.4	6.1	1.1	2	72.5898
O95050	-0.168061	1.9	0.868	0.74982	263	0	0.53	0	0	9.1	4.2	5.7	8	4.2	8	1.9	2.3	6.5	12.5	1.5	3	5.7	2.7	3.8	5.3	4.9	6.1	1.1	3.4	84.6008
O95057	-0.330303	10.61	0.458	0.675298	198	1	0.52	0	0	4	2.5	5.1	6.6	4	6.6	1	5.6	8.1	7.6	3.5	3	2.5	6.1	6.1	7.6	8.1	9.1	0.5	2.5	81.6162
O95067	-0.308291	35.43	1.19	0.707946	398	21	-0.69	0	0	6.3	1.3	4.8	6.5	2.3	3.3	2	5.3	8.8	11.6	3.3	5	4.5	5.8	4.5	6.5	5.5	8.5	0.8	3.5	96.7085
O95069	0.26784	28.17	0.503	-3.07366	426	7	0.26	0	10.7981	8	1.2	3.3	5.6	5.9	7	1.9	10.8	5.4	9.4	0.7	3.3	3.8	3.1	4.2	7	7.7	7.5	1.9	2.3	108.498
O95070	0.295222	19.8	10.1	-2.65594	293	5	0.77	0	6.82594	11.3	0.3	4.4	1.4	4.4	8.5	3.4	2.7	3.1	14	3.4	1.4	6.1	2.7	4.1	7.8	4.8	7.8	1.4	6.8	99.2491
O95071	-0.464952	49.77	7.55	0.959501	2799	122	3.95	0	21.8292	7.8	2	5.9	7.4	2.8	5.8	2.1	4.1	4.2	10	2.4	4.6	5.8	4.4	6.9	10.3	4.9	5.8	1	1.8	79.4712
O95072	-0.30128	46.98	0.024	1.34345	547	6	1.82	0	37.8428	7.1	1.1	1.6	14.3	2.2	2.9	1.8	5.5	1.6	13.7	2.4	0.9	14.3	4.2	9.3	4.2	3.1	6.6	1.5	1.6	101.079
O95073	-0.697324	18.39	0.009	1.94059	299	4	-0.92	0	0	3.7	0.7	5	10.4	2.3	2.7	3.7	5.7	7.7	11.7	2.7	4	5	6.7	7	8.7	3.3	6.4	0.3	2.3	89.9331
O95076	-0.665598	85.42	0.298	2.10558	343	5	2.65	1	16.035	8.2	1.7	3.5	5.5	3.5	9.9	3.5	1.5	4.7	8.7	1.2	2.3	16	3.5	5.8	8.5	4.1	3.5	1.2	3.2	58.105
O95081	-0.226819	73.39	2.71	0.824629	481	14	4.43	0	43.8669	10.6	1.5	2.5	2.5	6.4	12.3	0.8	1.2	3.5	6.2	1.7	2.3	13.1	6.2	3.3	12.1	6.4	5.8	0.6	0.8	56.6736
O95084	-0.477546	10.97	4.35	0.279616	383	4	0.67	0	5.48303	5.7	2.3	5.2	3.1	4.2	9.9	2.3	4.4	8.4	8.1	1.8	2.9	6	5.2	5.2	7.3	4.7	5.5	2.1	5.5	70.5222
O95096	-0.822711	77.29	0.581	2.42879	273	5	2.25	1	0	10.6	0.4	5.1	6.6	2.6	6.6	2.2	1.5	5.9	8.4	1.5	2.9	9.2	7	6.2	8.8	5.5	4	1.5	3.7	60.8791
O95104	-0.862511	76.98	19.5	3.15683	1147	25	5.63	1	24.9346	7.1	0.5	4.4	5.5	3.1	6.9	1.8	3.7	5	5	2.4	3.5	16.6	8.4	7.2	6.4	4.7	5.8	0.6	1.3	58.0035
O95125	-0.856636	54.94	0.19	1.83606	648	15	1.52	1	17.284	3.4	3.7	4.6	12	3.5	5.1	5.2	2.3	4	8.6	0.8	1.9	7.1	5.9	8.2	7.4	6.6	6.3	1.2	2	64.4753
O95136	0.60255	22.38	0.246	-4.28085	353	7	-0.82	0	15.864	8.8	3.1	1.4	3.4	3.7	5.7	3.1	5.9	2.5	15.9	1.7	3.1	4.2	2	5.4	8.8	5.7	9.9	1.7	4	122.606
O95140	-0.324967	8.45	5.08	0.009054	757	7	0.55	0	0	6.3	1.7	4.9	7.9	4.6	4.9	2.8	4.1	5.8	10.6	3.7	4	3	5.9	6.3	7.4	5	7.8	1.2	2	86.1295
O95147	-0.0121212	11.11	3.78	-0.120663	198	9	-1.25	1	0	7.6	2	3	3.5	3.5	7.1	4	7.6	4	8.1	3.5	3.5	6.1	3	7.1	7.1	5.1	8.1	2	4	92.0707
O95149	-0.649722	26.11	1.71	1.25248	360	18	0.62	1	0	4.2	2.2	5.8	7.8	3.1	5.8	3.9	1.9	7.5	10.6	3.1	3.6	5.8	3.9	4.4	9.4	4.7	5.8	1.7	4.7	69.8333
O95150	-0.166932	27.09	0.15	-0.43573	251	0	-0.45	0	0	7.2	2.4	4	6	6	6.4	2.4	2.8	4.8	11.2	2.8	2.8	5.6	6	4.4	7.6	7.2	6.4	1.2	3.2	80.0398
O95153	-0.696877	77.38	0.068	3.73631	1857	18	4.36	0	47.5498	8.9	2.2	4	10.8	1.6	9.2	1.4	2.1	3.1	10	1	2.1	10.7	5.5	7.9	9	3.8	4.5	0.9	1.2	69.1546
O95154	-0.292447	5.44	17.5	0.702631	331	12	-0.28	0	0	9.7	2.1	3	7.6	4.5	8.2	3.9	2.7	3.6	11.2	3	3.3	4.5	4.5	6.3	5.4	5.7	4.8	1.8	3.9	77.8852
O95155	-0.333487	30.57	5.11	-0.589907	1302	60	1.95	0	10.9063	6.8	1.8	4.9	6.6	4.5	3.6	1.8	4.4	4.8	11.1	2.8	3.5	7.2	5.5	5.8	10.9	5.4	5.2	0.8	2.5	82.4117
O95156	-0.25303	29.92	0.03	-0.172376	264	4	0.05	0	0	3.4	2.7	4.5	5.3	4.9	5.3	2.7	4.9	8.7	8.7	1.5	4.2	6.8	3	3.8	8.7	5.7	9.5	1.9	3.8	84.053
O95157	-0.487302	25.4	0.04	0.097585	252	7	0.92	0	0	5.2	3.6	4.8	4	4.4	7.5	4	5.2	5.6	6	1.2	4	9.1	5.2	5.6	8.7	4.4	6.7	1.6	3.6	68.0556
O95158	-0.0512987	37.66	0.739	-0.318105	308	0	1	0	11.6883	11	1.9	1.9	3.2	5.5	11.7	2.9	2.3	5.2	11	0.6	2.3	9.1	3.6	5.5	7.1	3.2	6.5	2.6	2.6	81.7857
O95159	-0.335484	34.84	5.55	0.99975	310	5	2.72	1	0	10	4.2	5.8	3.9	2.6	5.8	2.9	1.9	2.6	13.2	1.3	5.2	10.3	2.6	8.4	6.8	4.2	4.5	1.6	2.3	82.2258
O95163	-0.261261	9.53	18.1	-0.984084	1332	19	0.88	0	7.95796	6	2.2	5.4	7.4	4.1	5.2	3.1	4	5.9	11.6	2	4	4.4	5.5	4.1	8	5	8	1.7	2.7	89.985
O95169	-0.707527	13.98	11.7	-0.136348	186	7	3.54	0	13.9785	5.9	1.1	6.5	5.4	2.7	7.5	3.2	1.1	3.2	5.9	6.5	3.8	10.8	3.8	7.5	3.8	2.7	7.5	3.8	7.5	55
O95170	-0.20758	12.63	0.048	-1.22185	752	1	0.47	0	0	5.9	3.1	4.9	4.1	4.1	6	3.1	6.2	6.8	10.4	2.7	5.5	3.3	4	5.7	7.6	5.3	6.4	2.1	2.9	89.1888
O95171	-1.04549	86.19	1.53	3.02326	688	58	2.1	0	18.8953	3.6	1.3	6.4	6.1	1.2	4.8	1.5	5.4	9.2	6.8	1.6	9.7	5.7	5.2	6.8	9.2	7.3	5.5	0.6	2.2	67.2674
O95180	-0.165533	49.85	0.208	-4.18272	2353	15	3.85	0	15.7671	8.2	2.4	4.4	6.2	4.5	7.8	2.6	3.9	2.8	10.3	2.4	2.8	8.1	2.8	7.7	8.2	4.3	7	1.4	2.3	83.8972
O95185	-0.181096	16.22	0.102	-1.26852	931	17	2.85	0	0	7.5	3.5	5.2	6.1	2.7	5.8	2.6	4.9	4.7	10.7	1.5	4	6.1	4.4	4.5	7	6.9	7.1	1.8	2.9	89.2374
O95190	-0.151852	17.99	0.003	0.353215	189	1	-0.3	0	0	3.7	3.2	7.4	5.8	4.8	6.9	2.6	4.8	5.3	11.6	2.1	2.6	9	3.7	4.2	8.5	2.6	7.9	1.1	2.1	90.6878
O95196	-0.471555	72.97	0.274	1.65943	566	2	2.95	0	20.4947	8.5	2.3	6.4	9.2	3.2	10.8	2.1	2.5	3	9.7	1.2	3.7	9.7	3	3.5	8	5.8	4.4	1.2	1.8	68.8339
O95197	-0.394574	77.42	21	0.184999	1032	43	1.51	0	12.9845	6.3	1.1	6.6	8.7	3.6	4.9	2.1	5.8	7.6	8.2	1.5	3.3	5.3	3.5	2.3	13	7	6.9	0.7	1.6	81.0465
O95198	-0.151602	5.06	0.499	-0.67341	593	4	1.25	0	10.9612	7.9	3	4.9	6.6	2.4	6.6	2.4	2.7	4.6	9.3	3.7	4.7	3.9	3	6.1	6.6	5.6	11	1.5	3.7	86.4081
O95199	-0.099274	2.9	0.081	-1.04708	551	3	1.95	0	0	6.7	4.2	4.7	6.2	3.8	8.7	2.9	4.4	4	9.6	1.3	4.9	3.3	4.5	3.4	7.4	6.7	8.3	1.3	3.6	85.4265
O95201	-0.844946	42.78	0.05	2.2692	554	11	2.07	1	5.95668	8.8	3.8	3.6	6.9	2.7	9.4	6	2	5.6	5.6	1.3	1.3	8.8	5.4	7.2	8.1	6.5	3.8	1.4	1.8	49.4043
O95202	-0.43816	41.68	109	1.56785	739	19	0.9	0	20.0271	7.2	1.6	4.9	11	2.7	4.3	1.6	4.2	9.1	12.4	1.9	2.3	5.4	4.9	6.1	6.4	4.7	7.4	0.8	1.1	93.6671
O95206	-0.293084	28.13	0.573	0.506921	1070	11	2.14	0	47.0093	12.7	1.4	6.4	5.9	2.9	9.4	1.6	2.2	2.1	8.9	0.6	2.4	8.6	3.8	7.9	7.4	4.9	8.3	0.6	2.1	80.2056
O95208	-0.542278	81.9	2.09	1.88604	641	40	3.84	0	21.9969	10.1	0.6	3.9	5.6	2.5	7	1.2	2.3	4.5	8.7	2.3	4.4	9.2	6.1	5	11.9	7.2	4.7	1.6	1.1	66.9111
O95210	-0.538268	39.66	2.38	0.420498	358	23	0.32	0	11.1732	6.7	1.1	4.7	8.1	2.8	11.2	3.9	2	4.5	8.1	2	4.2	4.7	4.7	4.5	10.1	4.2	8.1	3.4	1.1	69.4134
O95218	-1.73394	78.48	45.2	5.80253	330	40	3.15	1	49.0909	3.3	2.4	5.8	10	1.5	6.4	1.2	1.2	10	2.4	1.2	4.5	2.1	0.6	14.8	24.2	3	1.8	0.9	2.4	22.7879
O95219	-0.606444	13.56	6.15	1.33238	450	7	-0.1	0	0	7.6	1.1	5.3	10.7	3.8	5.3	2.7	4	7.1	9.8	2.9	3.6	3.3	4.9	6.4	6	4.4	5.8	1.6	3.8	78.0444
O95221	0.673248	5.41	0.475	-4.48339	314	2	-0.31	0	22.9299	6.7	2.9	2.9	2.2	7.6	3.5	2.2	8	3.8	15.3	3.5	3.5	2.5	1.3	3.5	12.1	7.3	6.1	0	5.1	114.904
O95229	-0.722383	20.22	1.83	2.15401	277	6	0.6	0	24.9097	11.9	0.4	4.7	12.3	2.5	4.3	1.1	2.2	8.3	12.3	1.8	1.8	4	12.6	5.1	2.5	5.1	5.4	0.7	1.1	83.935
O95231	-0.43876	79.84	0.431	1.47167	258	3	3.2	1	12.4031	9.3	2.3	1.6	3.9	3.5	8.9	2.7	0.8	2.3	10.9	3.1	1.6	12.4	7.8	6.6	12.4	5	2.7	1.6	0.8	62.5194
O95232	-1.69861	50.23	57.3	6.2116	432	28	2.3	1	41.2037	3.9	1.6	6.7	14.1	1.4	4.4	2.3	2.3	10	6.2	1.9	2.3	1.2	4.4	17.1	11.3	3.5	3.5	0.2	1.6	47.4074
O95235	-0.546404	37.3	1.45	1.31203	890	67	1.63	0	8.31461	5.4	2	4.5	8.4	2.8	5.1	2.1	4.7	7	12.5	1.7	3.9	4.4	8.3	5.4	9.6	4.9	4.8	0.8	1.7	86.4494
O95236	-0.18607	6.47	1.99	0.119884	402	2	0.17	0	11.6915	11.7	1.7	2	8.7	4	6.7	2	5.2	4	9.7	1	2.7	2	4.5	7.5	9	8	5.7	1.2	2.7	86.4925
O95237	0.193043	26.96	0.252	-1.0276	230	3	0.02	0	0	6.5	1.7	4.8	5.2	4.8	6.1	2.6	6.1	4.8	13.5	2.6	4.3	3.5	1.7	5.2	7.4	6.1	8.7	0.9	3.5	108.043
O95238	-0.460896	34.63	0.77	1.19949	335	4	0.98	1	0	7.8	1.5	4.8	7.8	2.4	6.3	2.7	4.5	5.7	10.1	2.4	1.5	8.1	4.8	5.1	11	3	4.5	3.3	3	77.791
O95239	-0.748782	45.86	5.64	2.60359	1232	66	1	1	29.4643	6.1	2.3	4.9	11.4	2.2	4.1	1.2	4.1	10.1	11	2	4.2	3.4	8	5.3	7.3	5	5.6	0.4	1.4	81.2094
O95243	-0.760345	62.24	0.701	2.20184	580	21	0.14	1	10.5172	4.3	2.4	5.3	8.6	4.1	5.3	2.1	3.8	10.5	8.6	1.4	4.3	4.7	2.9	6	10.5	5.9	5.2	1.7	2.2	67.7241
O95248	-0.315899	32.98	3.76	-1.01734	1868	50	2.37	0	15.5782	7.6	2	4.8	7.1	4.1	6.4	2.5	2.4	3.5	11.4	1.5	1.8	7	5.5	7.7	8	5	7.9	1.3	2.5	84.2345
O95249	-0.5252	17.2	40.9	1.21439	250	16	-1.07	0	0	6.4	0.8	5.2	6.4	2.8	4.8	3.6	6	5.2	12	4.4	6	1.2	3.2	9.2	10	6.8	2.8	0.4	2.8	84.72
O95251	-0.940917	44.52	6.64	1.84432	611	57	1.56	1	0	3.9	2	5.9	7.5	2.8	4.7	3.3	3.6	7.7	8.7	2.5	4.1	4.9	4.4	8	11	5.9	3.6	1	4.6	62.2422
O95255	0.182369	12.38	0.326	-5.53864	1503	11	0.81	0	34.7305	9.9	1.9	3.4	4.7	4.6	7.4	1.9	3.7	3.3	14	1.6	2	5.2	5.6	5.9	7.7	4.5	8.5	2.3	1.8	103.633
O95256	-0.227045	9.85	0.048	-1.1358	599	7	-0.06	0	0	4	2.7	5	5.7	3.8	4.8	1.8	6	7	10.7	1	3.3	5.2	4.3	5.2	9.7	5.5	7.8	2.5	3.8	91.8698
O95257	-0.036478	9.43	0.881	0.594272	159	0	-0.17	0	0	10.7	3.8	7.5	10.1	2.5	7.5	1.9	5.7	2.5	10.7	1.3	3.8	4.4	4.4	3.8	5	4.4	8.2	1.3	0.6	98.1761
O95258	0.304615	0	0.324	-1.61079	325	3	0.12	0	9.53846	6.5	0.9	3.1	3.7	5.8	9.8	2.2	9.5	5.2	9.8	3.4	2.2	3.1	4.6	5.2	5.8	5.8	8.3	1.8	3.1	106.154
O95259	-0.193327	30.94	0.048	-2.134	989	4	1.01	0	0	6.8	1.9	5.8	6.1	5	5.8	2.1	6.2	6.2	9	2.2	3.8	4.2	3.7	5.8	8	5.3	7.8	1.5	2.9	88.5035
O95260	-0.681467	12.93	8.39	1.10252	518	12	2.23	0	5.40541	4.4	3.1	5.6	6.9	3.9	5.6	2.1	3.1	8.7	8.3	2.5	2.7	7.9	6	4.6	9.7	2.9	5.6	1	5.4	65.0965
O95263	-0.378757	30.73	0.237	0.347194	885	16	0.77	0	10.8475	8.5	3.1	6.3	6.1	3.7	4.5	4.3	6.6	4.9	7.5	1.9	4.7	4.5	3.8	6.2	8.6	5.6	6	0.9	2.3	80.4859
O95264	0.130159	10.88	0.067	-3.01139	441	2	-0.26	0	0	5.9	1.6	5.4	5	5.2	3.6	2.5	5.9	2.9	12.7	1.8	3.2	4.5	5.7	4.1	9.3	5	9.1	2.5	4.1	104.717
O95267	-0.388582	31.62	0.051	0.027808	797	17	0.35	0	0	6	2.6	4.9	7	3.8	4.3	3.3	4.8	7.7	11	2.5	4	5.5	4.4	4.9	8.8	4.6	5.8	1	3.1	84.4166
O95271	-0.327506	18.09	0.124	0.494983	1327	23	3.36	0	16.6541	11.5	2.3	5	5.6	2	8.3	5.1	3.4	5	10.8	1.6	4.7	6.1	3.6	4.4	7.2	5	5.7	0.3	2.4	83.1726
O95273	-0.193056	13.61	1.29	0.648267	360	1	-0.93	0	0	9.4	1.9	6.7	8.6	1.9	1.9	2.2	5.6	4.7	12.2	2.8	4.7	5.8	5.3	4.2	6.4	5.3	7.5	1.1	1.7	100.528
O95274	-0.220231	39.02	2.5	0.206557	346	2	2.3	0	5.49133	10.4	5.5	4.3	3.5	1.7	10.4	1.7	1.2	3.5	9	1.2	3.8	8.4	4.9	5.2	7.5	7.8	7.5	0.6	2	71.6474
O95279	-0.151102	35.07	0.4	-1.79324	499	14	0.75	0	0	7.4	1	2.8	7.6	5.6	8.4	1.6	5.2	6.2	9	1.6	4.2	6	3.2	3.6	8.2	5.6	7.2	2	3.4	83.8277
O95292	-0.379835	22.22	90.1	0.935013	243	18	1.17	0	0	5.3	1.6	5.8	8.6	4.1	4.1	1.2	4.9	9.5	8.6	3.3	4.1	5.8	3.3	4.9	7.8	6.6	9.1	0.4	0.8	84.5679
O95294	-0.264303	9.95	1.03	0.610989	804	5	0.08	0	13.1841	8.3	2	6.5	6.8	4	6.6	2.1	2.5	4.4	13.2	2.4	1.6	6.1	4.7	7.8	6.5	4.4	6.8	1.7	1.6	89.291
O95297	-0.0695167	32.34	6.95	-0.941626	269	21	1.17	0	0	7.8	1.1	4.8	3.3	3	8.2	2.6	5.6	6.3	8.2	1.1	3.7	5.6	3.3	3.3	10.4	5.9	10	1.9	3.7	90.5576
O95299	-0.451831	6.48	76	0.760271	355	4	0.44	0	0	5.6	1.7	6.2	6.2	3.7	6.2	3.1	5.1	7.9	10.4	1.4	3.1	4.2	4.5	5.9	6.5	4.8	6.8	1.4	5.4	85.662
O95302	-0.195614	8.77	9.54	-0.674097	570	0	1.21	0	18.7719	3.7	1.4	7.7	6	4.7	11.1	2.6	5.8	4.6	9.6	2.3	4	6.1	2.6	4.2	6	4	8.2	1.1	4.2	87.807
O95319	-0.241929	59.06	85.3	0.472507	508	5	0.24	1	27.5591	12.4	1.6	3.3	3.3	3.7	8.1	1.2	3.9	5.1	9.8	4.1	6.3	4.5	8.9	3.1	8.1	6.5	3.5	0.4	2	76.4173
O95336	0.158915	3.49	227	0.66546	258	8	0.42	0	13.9535	14	1.9	3.9	6.6	3.9	6.2	2.3	3.9	3.1	14.3	0.8	1.2	9.3	3.9	5.4	6.2	4.7	6.6	0.8	1.2	104.109
O95340	-0.406026	2.77	13	0.527317	614	10	0.39	0	0	6.7	1.6	5.9	7.2	3.9	7.3	3.6	4.9	6.8	9.3	2.6	3.6	5.4	2.9	6.7	4.9	5	7.3	1.6	2.8	83.1922
O95342	0.0109008	14.76	0.137	-3.80879	1321	13	0.68	0	13.7774	8.6	1.5	5	5.8	5.8	7.6	1.2	7.9	5	8.5	2.7	3.6	2.9	4.9	5.2	7.3	5.6	6.9	1	2.9	92.5965
O95343	-0.563253	44.58	0.523	1.73245	332	7	5.24	1	13.253	9	1.5	3.3	6.6	3.6	13.3	3.6	2.4	4.2	9	1.2	3.3	6.3	3.3	7.2	9.3	5.7	3.6	1.5	1.8	64.1566
O95347	-0.671345	12.28	77.3	2.25618	1197	15	0.77	1	29.1562	8.9	0.8	4.5	11.1	2.6	4.3	1.7	5	12.2	10.3	2.4	5.8	1.8	5.6	4.2	5.5	5.1	5.7	0.4	2.2	84.9541
O95352	-0.0711238	8.96	8.22	-0.76851	703	8	1.47	0	0	8.4	2.8	6	5.1	5.1	6.5	2	3.4	5.3	12.4	2.4	4	5.8	3.8	4.4	7	4.4	6.7	1.4	3	89.3599
O95359	-0.732836	98.51	3.09	4.49496	2948	135	3.13	0	51.3229	10.8	1.4	5.6	9.9	1.7	8.2	1.8	2	5.3	7.1	1.3	1.7	12.2	5.5	3.9	10.2	5.3	4.7	0.5	0.8	60.1153
O95361	-0.551773	8.87	2.21	0.808564	564	8	0.73	1	0	7.3	3	5	9.9	3.7	4.8	2.7	3.4	6.7	9.2	1.6	3.2	5.7	5.5	4.6	7.8	4.8	6	1.4	3.7	73.8475
O95363	-0.407761	9.98	2.48	0.178236	451	5	-0.32	0	6.20843	6.2	1.3	5.5	6.2	5.3	5.8	6.2	4.2	4.7	10.6	1.8	3.1	3.8	5.8	6.7	6	4	7.1	2	3.8	84.7228
O95365	-0.461473	43.66	3.53	2.01783	584	13	2.96	1	33.3904	13.2	2.4	8.9	5.3	3.4	11.3	2.7	2.4	4.5	7.2	1.4	2.7	7.4	3.8	5.1	6	3.9	5.5	0.5	2.4	66.4726
O95371	0.647436	4.17	0.005	-4.24589	312	0	-0.2	0	16.6667	6.7	3.5	2.2	2.6	5.8	7.7	1.3	6.7	2.9	16.7	3.2	3.8	3.8	3.5	4.5	7.7	5.1	7.4	1	3.8	119.359
O95372	0.169264	3.03	144	0.263552	231	1	-0.51	0	0	12.1	2.6	3.5	5.2	3	7.4	3.9	4.8	4.8	11.3	4.3	2.6	8.7	2.2	3.5	5.6	5.2	6.9	1.3	1.3	94.6753
O95373	-0.248362	10.02	65.8	-1.45254	1038	20	0.1	0	20.8092	6.5	2.2	6.8	8.9	3.8	3.8	2.7	7.1	5.1	11.3	2.8	3.9	4.3	6.8	3.6	3.8	5.4	6.2	1.3	3.8	96.0983
O95376	-0.762677	12.58	6.57	0.467685	493	8	0.71	0	11.1562	6.1	5.7	6.1	9.5	3	3.2	3.9	2.8	5.7	7.5	2.4	4.9	4.1	6.9	5.7	6.1	3.4	5.7	1.8	5.5	62.9006
O95377	0.12967	32.23	0.001	-2.48123	273	1	0.8	0	0	5.5	4.8	5.1	3.7	5.9	4.8	4.8	5.1	5.5	11.7	1.5	3.3	5.5	1.8	5.1	7.3	4	9.2	2.2	3.3	97.7656
O95379	-0.442424	8.08	88.9	1.17705	198	1	0.72	0	0	6.1	1.5	5.6	8.1	5.1	2	4	6.1	10.1	10.6	3	7.6	1	5.1	4	5.6	5.1	7.1	0	2.5	91.5657
O95382	-0.253571	21.35	0.439	-0.735422	1288	18	2.91	0	20.8075	8.7	2.3	4	6.7	3.2	7.1	2.4	3.3	2.4	12.9	1.6	2	7.9	6	7.9	7.1	4.8	5.9	1	2.8	88.7888
O95388	-0.177112	9.26	0.311	-0.423295	367	4	1.3	0	10.3542	8.2	10.4	5.7	3.5	3	6	1.4	4.1	3	6.3	1.4	4.4	9	3.5	6.3	6.8	5.7	6	2.5	3	65.9401
O95389	-0.29548	9.89	0.244	-0.349116	354	2	1.01	0	10.1695	3.7	10.2	3.4	4	4	7.6	1.4	4.8	8.5	8.2	1.7	4	7.6	5.9	4.2	7.3	5.4	4.2	1.4	2.5	66.6384
O95390	-0.286978	26.04	0.077	0.454336	407	6	0.85	0	0	9.1	3.2	4.2	6.1	3.4	7.6	3.2	4.4	4.4	10.3	2.2	2.2	7.9	5.2	6.6	6.6	3.9	5.2	1.7	2.5	81.5479
O95391	-1.24283	45.05	2.3	3.66051	586	23	1.54	0	24.744	6.3	1.4	6.3	12.3	2	4.9	3.1	3.8	12.5	5.5	2.7	4.1	4.9	4.6	5.6	6	3.9	3.9	1.5	4.6	53.6348
O95393	-0.375236	25.71	0.324	0.640322	424	1	-0.1	0	0	5.2	2.1	6.6	9	3.8	5.2	2.4	6.1	5.7	10.6	2.8	4.7	4.5	3.3	4.5	9.2	4.5	5.2	0.9	3.8	85.5425
O95394	-0.281734	2.03	38.9	0.485297	542	7	0.85	0	0	8.9	1.5	6.3	6.8	3.3	7.9	3.5	4.8	6.6	9.8	2.4	3.1	2.8	5.4	4.1	6.3	5	7.6	0.4	3.7	87.6384
O95395	-0.399543	6.85	0.921	-0.323616	438	2	-0.67	0	0	6.6	3	5	6.4	3.9	3.4	3.7	4.6	7.8	10.3	2.5	5	5	4.3	5	6.2	3.9	6.6	2.3	4.6	83.6986
O95396	0.0706522	6.96	3.63	0.210239	460	4	1.08	0	26.5217	11.5	3.5	5.2	6.3	1.7	7.4	1.7	2.8	3.3	15	0.7	1.5	5.7	4.8	7	6.1	3.5	8.9	0.4	3	106.891
O95397	-0.278261	34.78	0.469	0.897792	391	11	-0.22	0	0	6.1	2.6	4.9	9.7	3.3	4.9	2	5.1	7.7	11.5	3.3	5.9	3.3	3.6	2.6	7.9	7.2	6.1	0.8	1.5	88.7724
[truncated: 14,931 more rows]

## Sheet: Human Proteome_PFAM Domains
UniprotID	Protein	PFAM domains
Q9NQ39	RS10L	1
Q99470	SDF2	1
Q8N8B7	TEANC	2
Q658L1	SAXO2	0
O75494	SRS10	1
Q9NQ55	SSF1	1
Q8IW03	SIAH3	1
Q5HYW3	RTL5	2
Q96L92	SNX27	4
Q99598	TSNAX	1
Q9H489	TSY26	1
P49765	VEGFB	1
Q96EX3	WDR34	2
Q9NYU1	UGGG2	7
Q8NDW8	TT21A	12
Q5JXB2	UE2NL	1
Q9NRP4	SDHF3	2
P49815	TSC2	3
Q96FV3	TSN17	1
O95859	TSN12	1
Q05066	SRY	2
Q9Y2R5	RT17	1
Q969E3	UCN3	1
Q5T1N1	AKND1	1
P17213	BPI	2
Q92772	CDKL2	2
Q9P0S2	COX16	1
Q92685	ALG3	1
P15088	CBPA3	2
Q96HB5	CC120	1
O95415	BRI3	1
H3BNL1	CC084	1
P16152	CBR1	3
Q9H8M2	BRD9	2
Q1T7F1	CCB42	0
P0DN87	CGB7	1
P15289	ARSA	3
Q8NAV2	CH058	1
P36575	ARRC	2
Q9HBK9	AS3MT	8
Q6ZSI9	CAN12	2
Q16663	CCL15	1
Q68D86	C102B	0
P59510	ATS20	9
P13501	CCL5	1
P84077	ARF1	6
Q9NVP2	ASF1B	1
A5YM69	ARG35	1
P28332	ADH6	2
Q8WWL7	CCNB3	2
P05089	ARGI1	1
P60033	CD81	1
P10747	CD28	2
P10966	CD8B	3
P42575	CASP2	2
P23280	CAH6	1
Q9H5V8	CDCP1	0
Q9BXL8	CDCA4	1
Q8IYS0	ASTRC	2
Q16790	CAH9	1
P02511	CRYAB	2
Q5T601	AGRF1	3
Q8NB49	AT11C	5
A6NJJ6	CS067	1
P50052	AGTR2	1
Q8IZS7	CLCL1	0
P14415	AT1B2	1
A6H8M9	CDHR4	1
Q9Y5P2	CSAG2	0
Q9HBB8	CDHR5	0
P10092	CALCB	1
Q8N157	AHI1	5
P98194	AT2C1	6
O75508	CLD11	1
O00512	BCL9	1
Q5VTU8	AT5EL	1
Q9NZT1	CALL5	9
Q9NYV4	CDK12	3
P05496	AT5G1	1
P07333	CSF1R	6
P04141	CSF2	1
O94921	CDK14	2
P57739	CLD2	2
Q8TF62	AT8B4	4
O95471	CLD7	2
P0DMR3	AT8OS	0
A8MUL3	ADAS1	0
P35869	AHR	4
Q96QE3	ATAD5	1
Q5TC04	ATAS1	0
Q00534	CDK6	4
Q8NEV1	CSK23	3
Q5VXU3	CHIC1	1
Q08828	ADCY1	2
Q9UKJ5	CHIC2	1
P17544	ATF7	3
O15247	CLIC2	3
Q96NY7	CLIC6	1
O60266	ADCY3	2
Q9H0Y0	ATG10	1
P49759	CLK1	2
Q7LBR1	CHM1B	1
P49761	CLK3	2
Q9UQN3	CHM2B	1
Q9H444	CHM4B	1
P59074	CHM4P	1
Q10567	AP1B1	8
Q8TDN7	ACER1	1
Q5K131	CLLU1	0
Q496F6	CLM2	1
Q96PZ7	CSMD1	3
Q96FZ7	CHMP6	1
A8K4G0	CLM7	1
Q9UGJ0	AAKG2	1
Q9UGI9	AAKG3	1
Q9UNE7	CHIP	12
Q13286	CLN3	1
Q9H7C9	AAMDC	1
Q02338	BDH	4
P61201	CSN2	1
P56377	AP1S2	1
Q9UNS2	CSN3	1
P06576	ATPB	2
Q96BS2	CHP3	0
Q6P575	BGP11	1
O96017	CHK2	4
O94973	AP2A2	4
Q92905	CSN5	2
Q7L5N1	CSN6	2
Q92989	CLP1	3
A6H8Y1	BDP1	1
P43681	ACHA4	2
Q9NRG0	CHRC1	1
Q6VUC0	AP2E	1
Q9H2X0	CHRD	2
P02708	ACHA	2
P17787	ACHB2	2
P30926	ACHB4	2
A8MW95	BECN2	2
Q13367	AP3B2	5
Q9Y2T2	AP3M1	2
P59780	AP3S2	1
Q6ZTN6	AN13D	1
Q8WYN0	ATG4A	1
Q6UVK1	CSPG4	3
Q96N21	AP4AT	1
Q8NHS2	AATC2	1
P39687	AN32A	4
Q86TL0	ATG4D	1
P50583	AP4A	1
P0C6C1	AN34C	5
Q9NYM9	BET1L	0
P54802	ANAG	3
Q9Y6B7	AP4B1	5
O00189	AP4M1	2
O15155	BET1	0
Q6PI77	BHLH9	1
Q9UPM8	AP4E1	2
P55061	BI1	1
Q9GZX3	CHST6	2
Q7LGC8	CHST3	2
O14727	APAF	9
Q7LFX5	CHSTF	2
P55957	BID	1
O00499	BIN1	4
Q92870	APBB2	3
Q5BN46	CI116	1
A6NHY6	CI118	0
B1AMM8	CI107	0
Q9Y375	CIA30	1
Q9UPN4	CP131	0
Q16570	ACKR1	0
Q66GS9	CP135	0
Q6UXH0	ANGL8	0
Q9Y615	ACL7A	3
Q16527	CSRP2	1
Q8TDX5	ACMSD	1
O75838	CIB2	3
O60543	CIDEA	1
Q96C57	CSTOS	0
Q8WYK0	ACO12	2
Q9NUD7	CT096	1
Q9BQM9	CT144	1
Q9H4R4	CT191	1
O43313	ATMIN	0
Q15067	ACOX1	3
Q9HB55	CP343	1
Q9Y271	CLTR1	4
Q9Y6A2	CP46A	1
Q8TCG1	CIP2A	0
Q9BW61	DDA1	1
P98187	CP4F8	1
Q9HBI6	CP4FB	1
Q9HCS2	CP4FC	1
Q0VD83	APOBR	0
Q9Y471	CMAH	1
P00846	ATP6	1
Q17RY0	CPEB4	3
Q8N4M7	CJ126	0
Q96A22	CK052	1
Q8IYJ2	CJ067	2
Q8N326	CJ111	0
Q07065	CKAP4	0
Q9NX76	CKLF6	1
O95639	CPSF4	6
Q86WS4	CL040	1
P33552	CKS2	1
Q8TC84	FANK1	5
P23786	CPT2	1
P29973	CNGA1	3
Q86T13	CLC14	0
Q14032	BAAT	3
Q8WZ19	BACD1	1
Q96F85	CNRP1	1
P56945	BCAR1	5
Q01433	AMPD2	1
Q86UK0	ABCAC	3
P45844	ABCG1	2
Q9H3Z7	ABHGB	2
Q9Y264	ANGP4	1
Q8IZY2	ABCA7	3
P28330	ACADL	4
Q96GR2	ACBG1	1
Q9NXR5	ANR10	5
Q9NZU0	FLRT3	4
P14138	EDN3	1
Q49MI3	CERKL	1
Q5VU57	CBPC6	2
Q8NDH2	CC168	1
A0A0U1RR11	CENL1	1
Q5W0U4	BSPRY	2
P00414	COX3	1
Q9P0B6	CC167	1
Q96Q07	BTBD9	3
Q9UL16	CFA45	1
H3BN30	CP097	0
Q5T3Y7	BVAS1	0
Q6NT52	CGB2	1
P0DMQ9	CH089	1
Q8WZ64	ARAP2	9
Q7L1Q6	BZW1	1
P17655	CAN2	5
Q9H672	ASB7	6
O75973	C1QRF	2
P53367	ARFP1	1
Q6XD76	ASCL4	1
Q8N8Q1	C56D1	1
A7E2U8	CD047	1
Q9Y4W6	AFG32	4
P33681	CD80	5
Q12834	CDC20	3
P55212	CASP6	1
Q13042	CDC16	10
Q14790	CASP8	2
P41180	CASR	4
Q8NEA5	CS018	1
Q86Y34	AGRG3	2
P41182	BCL6	6
Q9UN42	AT1B4	1
A0A1B0GTH6	CS2IP	0
P30988	CALCR	2
Q6XLA1	CSC2A	0
Q01814	AT2B2	7
O75534	CSDE1	4
Q9UKF2	ADA30	5
Q13939	CALI	7
P24539	AT5F1	1
Q9Y2W7	CSEN	7
P27482	CALL3	9
Q06055	AT5G2	1
Q8N6F1	CLD19	2
Q7Z4Y8	AT5L2	1
Q96Q40	CDK15	2
O95832	CLD1	2
Q9ULK2	AT7L1	1
P09919	CSF3	2
Q8N888	BCOR2	1
Q00536	CDK16	4
P0DP25	CALM3	10
Q9Y2Q0	AT8A1	6
P56747	CLD6	2
Q9H2U9	ADAM7	7
O60423	AT8B3	5
P06493	CDK1	2
P0DML2	CSH1	1
Q8NHS1	CLDN2	1
Q13443	ADAM9	8
Q6Q4G3	AMPQ	3
Q8IZL9	CDK20	2
Q6PL18	ATAD2	5
Q96EY9	ADAT3	2
P24941	CDK2	2
Q16602	CALRL	2
Q00526	CDK3	2
Q00535	CDK5	2
P00813	ADA	1
Q13536	CROC4	1
P19784	CSK22	3
P45954	ACDSB	4
P41240	CSK	6
P16442	BGAT	1
Q6ZT62	BGIN	4
P15336	ATF2	2
Q9Y2D1	ATF5	2
Q9NZA1	CLIC5	2
P18848	ATF4	2
O43306	ADCY6	3
P49760	CLK2	2
Q9HD42	CHM1A	1
Q06278	AOXA	6
Q9HAZ1	CLK4	2
Q63HQ0	AP1AR	1
P15882	CHIN	3
Q8TDQ1	CLM1	2
Q9NUN7	ACER3	1
Q9Y3E7	CHMP3	1
Q6UXZ3	CLM5	1
Q8WUX9	CHMP7	1
Q9UGN4	CLM8	3
Q6UX39	AMTN	1
Q6UXG3	CLM9	2
Q4G0I0	CSMT1	1
O43747	AP1G1	3
Q9BXS5	AP1M1	2
P12821	ACE	1
Q9Y6Q5	AP1M2	2
P61966	AP1S1	1
O15516	CLOCK	4
O14757	CHK1	3
O43745	CHP2	6
P35611	ADDA	1
Q9UBW8	CSN7A	2
Q9H9Q2	CSN7B	2
Q15822	ACHA2	2
Q99627	CSN8	1
Q92754	AP2C	1
Q9Y259	CHKB	3
P36544	ACHA7	2
P53680	AP2S1	1
Q9UDR5	AASS	4
Q9H078	CLPB	10
Q7RTS1	BHA15	1
Q04844	ACHE	2
Q7RTU4	BHA09	1
Q92572	AP3S1	1
Q9UKV3	ACINU	2
P13611	CSPG2	6
Q8NDZ0	BEND2	1
Q8IVF6	AN18A	7
Q5SZJ8	BEND6	1
Q9BXX3	AN30A	6
O95196	CSPG5	2
Q96DT6	ATG4C	1
Q9BTT0	AN32E	5
Q13541	4EBP1	1
Q86X52	CHSS1	4
Q93088	BHMT1	1
O43299	AP5Z1	1
Q9Y4C5	CHST2	2
Q8NCG5	CHST4	2
Q9NUS5	AP5S1	1
Q8TD16	BICD2	1
Q8NET6	CHSTD	1
O95352	ATG7	2
Q9Y6D5	BIG2	4
Q9NWD9	BEX4	1
Q6ZRZ4	CI047	1
A6NGG3	CI092	1
P53396	ACLY	4
P11511	CP19A	1
Q9H175	CSRN2	1
O60676	CST8	1
Q8NCL9	APCDL	1
P25054	APC	15
Q9BU20	CPLN2	2
O14810	CPLX1	1
Q8WVH0	CPLX3	1
F7VJQ1	APRIO	0
Q8N1V8	CJ085	0
Q96M02	CJ090	2
Q96FG2	ELMD3	1
Q9H7T3	CJ095	0
Q99829	CPNE1	2
P0C842	CJ052	1
O94983	CMTA2	3
P58418	CLRN1	0
Q9P2I0	CPSF2	5
Q96DZ9	CKLF5	1
Q9BPX3	CND3	3
P62633	CNBP	4
Q16280	CNGA2	3
P11021	BIP	2
Q08AH3	ACS2A	2
A8MTZ7	CL071	1
Q9UPM9	B9D1	1
Q8TCD1	CR032	1
O94778	AQP8	1
Q92934	BAD	1
Q9UQC9	CLCA2	1
Q8N1P7	CRBG2	3
Q562R1	ACTBL	1
Q86WK7	AMGO3	2
Q8N8G6	CO054	0
Q9UKV5	AMFR	9
Q04917	1433F	1
A0PJZ0	A20A5	5
P01023	A2MG	8
Q9BSY4	CHCH5	2
Q9UMQ3	BARX2	1
Q04771	ACVR1	4
P54107	CRIS1	2
Q01432	AMPD3	1
P01160	ANF	1
Q8WW27	ABEC4	5
Q9BQD7	ANKMT	0
Q12955	ANK3	8
P28039	AOAH	2
Q4KMQ2	ANO6	2
Q86SG2	ANR23	5
Q9NYQ7	CELR3	11
Q8N5M1	ATPF2	1
P31749	AKT1	5
Q53EZ4	CEP55	1
Q8IUR7	ARMC8	4
Q9P209	CEP72	2
Q8NEM8	CBPC3	2
P00395	COX1	1
P32247	BRS3	3
Q13352	CENPR	1
Q8N5B7	CERS5	2
Q9HD87	CF050	0
Q8NCU1	CC197	0
Q76B58	BRNP3	1
P09669	COX6C	1
Q7Z7K0	COXM1	1
P0CG36	CFC1B	1
Q4VC31	CCD58	1
Q8N6T3	ARFG1	1
Q9BXT2	CCG6	1
Q9ULU8	CAPS1	2
O60563	CCNT1	1
P35318	ADML	1
Q8N9H9	CA127	1
P15812	CD1E	2
P25063	CD24	1
P55285	CADH6	3
O75493	CAH11	1
Q8WTX7	CAST1	2
Q9P241	AT10D	4
P35219	CAH8	1
Q9BY15	AGRE3	5
O00468	AGRIN	9
P09497	CLCB	1
P51788	CLCN2	1
Q9Y600	CSAD	3
Q9BYE9	CDHR2	2
Q6PB30	CSAG1	0
Q9NZK5	ADA2	2
P56749	CLD12	0
Q9Y534	CSDC2	1
O94886	CSCL1	3
Q05682	CALD1	1
Q9H305	CDIP1	1
A2AJT9	BCLA3	1
Q9BZ11	ADA33	8
Q15131	CDK10	3
Q96B33	CLD23	1
Q14CW9	AT7L3	2
P0DP24	CALM2	10
Q8NCV1	ADAD2	2
Q5T6C5	AT7L2	1
H7C241	CLD34	0
Q8N7P3	CLD22	1
Q99965	ADAM2	4
P98198	AT8B2	4
Q96AP0	ACD	1
P27824	CALX	1
Q8WXE0	CSKI2	10
Q9BZP6	CHIA	2
Q00610	CLH1	5
O14936	CSKP	8
Q7Z695	ADCK2	1
Q5T2N8	ATD3C	4
Q5VUY0	ADCL3	1
Q5VUY2	ADCL4	1
Q8NFM4	ADCY4	3
Q99941	ATF6B	2
Q8IYS8	BD1L2	1
Q96DZ5	CLIP3	6
P51828	ADCY7	3
O94817	ATG12	2
O43633	CHM2A	1
O43741	AAKB2	2
O60641	AP180	2
O60503	ADCY9	1
P54619	AAKG1	1
Q7Z407	CSMD3	3
Q9NZZ3	CHMP5	1
Q08708	CLM6	2
P22303	ACES	3
Q9H6B4	CLMP	6
O75843	AP1G2	3
Q13098	CSN1	2
O75503	CLN5	1
Q7Z7G1	CLNK	1
Q9H9P2	CHODL	1
P04745	AMY1	2
P08236	BGLR	3
Q96KA5	CLP1L	1
P23560	BDNF	1
Q9P2E5	CHPF2	2
P32297	ACHA3	2
Q3B7T3	BEAN1	0
Q9BXX2	AN30B	6
P00505	AATM	1
C9JSJ3	BHMG1	2
Q9Y587	AP4S1	1
Q8IZ52	CHSS2	1
Q13542	4EBP2	1
O43916	CHST1	2
Q6PCB6	AB17C	4
Q9NS84	CHST7	2
Q7Z5R6	AB1IP	2
Q9H2A9	CHST8	1
Q6ZP65	BICL1	1
Q9NPF2	CHSTB	1
A1A5D9	BICL2	0
Q8NCH0	CHSTE	1
Q9NRB3	CHSTC	1
Q6AI39	BICRL	1
Q9NQY0	BIN3	2
Q99758	ABCA3	3
Q9BUW7	CI016	1
Q5W0N0	CI057	1
Q96LT7	CI072	1
Q5VTT2	CI135	1
Q96MD7	CI085	1
Q5JWF8	ACL10	1
Q5JTZ5	CI152	1
P05093	CP17A	1
P08172	ACM2	2
Q9UJX3	APC7	0
Q99828	CIB1	5
O95996	APCL	8
Q9BV73	CP250	1
Q9ULZ1	APEL	1
Q8WXF7	ATLA1	1
Q8NHU0	CT453	1
Q9UPZ9	CILK1	2
A0A087X1C5	CP2D7	1
Q9UNU6	CP8B1	1
P02656	APOC3	1
P56277	CMC4	1
P05090	APOD	3
Q9BZB8	CPEB1	4
Q9NZU1	FLRT1	4
Q8TEF2	CJ105	1
A6NJI1	CK086	1
Q9H3H3	CK068	1
Q3C1V1	CK091	1
Q96SN8	CK5P2	1
Q8N769	CN178	0
Q9NSA3	CNBP1	1
Q96Q91	B3A4	2
Q8IZR5	CKLF4	1
Q13956	CNCG	1
Q9UKF6	CPSF3	7
P15291	B4GT1	2
P16619	CL3L1	1
P50416	CPT1A	2
Q6QNY1	BL1S2	1
Q8NHY0	B4GN2	1
Q68CK6	ACS2B	2
Q96FQ7	CR018	0
Q9H8M5	CNNM2	2
Q9H8M1	CQ10B	1
P53673	CRBA4	1
O43315	AQP9	1
Q8NBQ7	AQP11	1
Q9BV87	CNPD1	1
O95816	BAG2	0
A6NIL9	CRAS1	0
Q86Y29	BAGE3	1
Q8IZ83	A16A1	2
Q8IZY5	BLID	0
Q676U5	A16L1	5
P20848	A1ATR	1
P01031	CO5	10
Q86WJ1	CHD1L	3
P25067	CO8A2	2
Q02930	CREB5	3
O75363	BCAS1	0
Q15758	AAAT	1
P24071	FCAR	0
Q9UJX6	ANC2	2
Q9HBH7	BEX1	1
Q9NUQ8	ABCF3	5
P20800	EDN2	1
O15544	GR6	0
Q9Y6V7	DDX49	3
Q13206	DDX10	4
Q8N8A6	DDX51	3
P59020	DSCR9	0
Q16832	DDR2	3
Q9H6S3	ES8L2	6
O43402	EMC8	1
O75618	DEDD	1
Q8TE59	ATS19	8
Q01151	CD83	2
P30203	CD6	2
P06127	CD5	1
Q5VUJ5	AGAP7	6
P38432	COIL	1
Q96GN5	CDA7L	1
P27701	CD82	1
Q13112	CAF1B	4
Q8IXJ9	ASXL1	3
O43186	CRX	2
Q96PE1	AGRA2	5
Q9ULX7	CAH14	1
Q14246	AGRE1	7
Q99741	CDC6	5
P43166	CAH7	1
Q5R3K3	CAHM6	1
O00253	AGRP	1
Q4VNC0	AT135	5
Q9BYV1	AGT2	1
P54707	AT12A	6
P51790	CLCN3	2
O14983	AT2A1	6
P51798	CLCN7	2
Q5T3F8	CSCL2	3
P0C6P0	BCL8	1
O75185	AT2C2	5
Q9Y5I7	CLD16	1
Q8TBG4	AT2L1	1
Q8IUZ5	AT2L2	1
P56750	CLD17	2
Q14004	CDK13	3
P56856	CLD18	2
P0DP23	CALM1	10
P48201	AT5G3	1
C9JDP6	CLD25	1
Q00537	CDK17	4
Q5H9F3	BCORL	7
Q6W2J9	BCOR	7
Q9BWU1	CDK19	2
O00501	CLD5	2
O14493	CLD4	2
O43520	AT8B1	5
Q9NY35	CLDN1	2
O75689	ADAP1	3
A9YTQ3	AHRR	2
Q9BUB4	ADAT1	1
Q14406	CSHL	1
O95433	AHSA1	2
Q719I0	AHSA2	1
P11802	CDK4	3
Q5SQI0	ATAT	1
Q9BZJ0	CRNL1	5
P27797	CALR	1
Q9GZX7	AICDA	10
Q9BQI0	AIF1L	0
P67870	CSK2B	1
Q96NN9	AIFM3	12
Q9Y276	BCS1	2
Q9BYF1	ACE2	2
O43852	CALU	0
Q86WG3	ATCAY	3
Q9NVV5	AIG1	1
A8MUP2	CSKMT	3
P53675	CLH2	4
Q9NYX4	CALY	1
Q9NVI7	ATD3A	2
Q6P093	ADCL2	3
O95260	ATE1	2
P18847	ATF3	3
Q6PD74	AAGAB	1
Q08462	ADCY2	3
P18850	ATF6A	2
Q9Y696	CLIC4	1
P30622	CLIP1	2
Q8NFC6	BD1L1	1
O95622	ADCY5	3
Q9Y478	AAKB1	2
Q9BY43	CHM4A	1
Q13685	AAMP	3
Q9UGM1	ACHA9	2
Q14457	BECN1	3
O00203	AP3B1	6
P11230	ACHB	2
P07510	ACHG	2
Q400G9	AMZ1	0
A2A2Z9	AN18B	7
Q9H0R1	AP5M1	1
Q7L1S5	CHST9	1
Q9H1Y0	ATG5	1
Q00994	BEX3	1
Q5H9J7	BEX5	1
Q9H8E8	CSR2B	3
Q9P2X8	CI027	0
O95704	APBB3	1
Q6P4H8	ACKMT	0
Q5T035	CI129	0
O00590	ACKR2	1
Q15389	ANGP1	1
Q96S65	CSRN1	1
P50461	CSRP3	1
Q05048	CSTF1	3
Q7Z7B0	FLIP1	1
P20853	CP2A7	1
A0A1B0GTL2	CT204	0
Q02318	CP27A	1
Q5JQC4	CT47A	1
Q86TX2	ACOT1	3
P33260	CP2CI	1
P24903	CP2F1	1
Q92858	ATOH1	1
O15371	EIF3D	1
Q06481	APLP2	5
Q16850	CP51A	1
O96005	CLPT1	1
Q86X95	CIR1	1
O43155	FLRT2	5
O76031	CLPX	6
O14791	APOL1	1
O95236	APOL3	1
P41970	ELK3	1
Q13794	APR	1
Q86VU5	CMTD1	2
Q96JB5	CK5P3	1
Q86U37	CN023	0
Q9UBX8	B4GT6	2
Q2HXU8	CL12B	2
Q2KHT3	CL16A	1
Q8N1N0	CLC4F	2
Q92600	CNOT9	1
O95628	CNOT4	3
Q9H161	ALX4	2
H3BRN8	CO065	1
P35609	ACTN2	6
Q9BU40	CRDL1	1
P07360	CO8G	1
Q07812	BAX	1
P05067	A4	6
Q9NZV1	CRIM1	3
Q9C0K0	BC11B	3
P46098	5HT3A	2
P10275	ANDR	3
P16860	ANFB	1
Q8WWZ4	ABCAA	4
Q5T8D3	ACBD5	1
P27216	ANX13	1
Q0Z7S8	FABP9	2
P07148	FABPL	2
P20711	DDC	2
Q5TDH0	DDI2	6
Q13474	DRP2	5
Q6PIV2	FOXR1	1
Q9BW60	ELOV1	1
Q9NQI0	DDX4	2
P55265	DSRAD	4
Q96GK7	FAH2A	1
Q4ZHG4	FNDC1	3
Q9Y4J8	DTNA	3
O60667	FAIM3	1
Q9BVV2	FND11	1
Q9H6D8	FNDC4	1
Q8NAU1	FNDC5	2
Q96BQ1	FAM3D	1
Q8TBE3	FNDC9	0
Q14CZ7	FAKD3	3
Q00597	FANCC	1
Q8TC17	GRAPL	4
P34896	GLYC	2
Q9GZT9	EGLN1	3
Q9NRD8	DUOX2	8
Q92636	FAN	4
Q99996	AKAP9	1
Q16667	CDKN3	3
Q68CP9	ARID2	2
F2Z3F1	CE067	0
Q7Z6I8	CE024	1
Q9Y2Z9	COQ6	1
Q6T311	ARL9	5
Q9UKI2	BORG2	2
Q8N8E3	CE112	1
Q96KX2	CAZA3	1
Q8N4F0	BPIB2	2
P24298	ALAT1	1
P25440	BRD2	2
P19835	CEL	3
Q8N4T0	CBPA6	2
P51587	BRCA2	5
Q71F23	CENPU	1
Q9GZN4	BSSP4	2
Q8WUD4	CCD12	1
Q96LL3	CP092	1
P32121	ARRB2	2
Q0P6D6	CCD15	0
Q99731	CCL19	1
P13500	CCL2	1
P02745	C1QA	2
O95671	ASML	3
Q7Z5L3	C1QL2	2
Q8N6N3	CA052	1
Q8N556	AFAP1	1
Q8TF27	AGA11	7
P21926	CD9	1
P30260	CDC27	14
Q16526	CRY1	2
O95994	AGR2	1
Q13111	CAF1A	4
Q3KR37	ASTRB	2
Q9NQ11	AT132	3
Q49AN0	CRY2	2
P32320	CDD	2
P05023	AT1A1	6
Q13733	AT1A4	6
P51797	CLCN6	2
Q6ZTQ4	CDHR3	3
P05937	CALB1	5
Q4VC05	BCL7A	1
Q5TGY3	AHDC1	1
P78369	CLD10	1
P23634	AT2B4	7
O43529	CHSTA	1
Q9NZM4	BICRA	1
Q9Y6D6	BIG1	4
Q02410	APBA1	4
P25106	ACKR3	1
O94805	ACL6B	1
P11229	ACM1	3
Q9H6Q4	CIAO3	2
Q8N365	CIART	1
P20309	ACM3	3
Q9UJX5	APC4	2
Q96RK0	CIC	2
Q12996	CSTF3	2
P11509	CP2A6	1
Q13315	ATM	4
P0DMU9	CT45A	1
Q8N100	ATOH7	1
Q96SQ9	CP2S1	1
O75947	ATP5H	1
Q9P2M7	CING	1
P13584	CP4B1	1
P08519	APOA	3
Q9NZ45	CISD1	2
Q8NE35	CPEB3	3
P02649	APOE	1
O95445	APOM	1
Q96RK1	CITE4	1
Q6PUV4	CPLX2	1
Q9H5F2	CK001	1
Q8IZ81	ELMD2	1
Q7Z2E3	APTX	5
Q96N53	CK037	0
Q8N1G2	CMTR1	2
Q6UXS0	CL19A	1
O43286	B4GT5	2
Q9C0J1	B3GN4	2
P10323	ACRO	1
Q9BSJ5	CQ080	0
Q32Q52	CL074	1
Q6PI25	CNIH2	1
F2Z3M2	CQ112	0
A5YKK6	CNOT1	5
Q13520	AQP6	1
P60709	ACTB	1
P08572	CO4A2	2
Q9NY43	BARH2	1
P13671	CO6	4
Q4AC99	1A1L2	1
Q9BXH1	BBC3	1
Q96HD9	ACY3	1
P28838	AMPL	2
Q86UU0	BCL9L	1
Q96FX2	DPH3	1
Q14507	EP3A	1
Q9BT04	FUZZY	0
P06734	FCER2	1
P17174	AATC	1
Q4LEZ3	AARD	0
Q9BUH8	BEGIN	0
Q8N6S4	AN13C	6
O76090	BEST1	1
O60516	4EBP3	1
Q0P651	ABD18	1
Q4W5N1	ABCAB	1
P28223	5HT2A	4
Q9NX38	ABITM	1
Q96J66	ABCCB	4
P07108	ACBP	1
O00400	ACATN	1
P05413	FABPH	2
Q96LA8	ANM6	6
Q92466	DDB2	2
Q8NEL9	DDHD1	2
Q6P2E9	EDC4	1
Q5VTH2	FLTOP	0
Q9C009	FOXQ1	1
Q5VTE0	EF1A3	3
A6NLF2	ELB3D	2
Q14126	DSG2	1
Q96DP5	FMT	2
A4GXA9	EME2	1
O14640	DVL1	5
Q9NR80	ARHG4	5
P56202	CATW	2
P56539	CAV3	1
Q8N8U9	BMPER	4
O43918	AIRE	3
Q96JD6	AKCL2	1
Q6ZSZ5	ARHGI	3
P40616	ARL1	6
O15432	COPT2	1
Q8TDL5	BPIB1	2
O14579	COPE	3
Q8N5S3	CB073	1
Q2UY09	COSA1	5
P17516	AK1C4	1
P04075	ALDOA	1
Q49B96	COX19	1
P14384	CBPM	3
P23435	CBLN1	1
Q6PL45	BRID5	1
Q96G97	BSCL2	1
Q6P387	CP046	1
P63098	CANB1	7
Q8IV32	CCD71	1
P15538	C11B1	1
Q16627	CCL14	1
Q96NS5	ASB16	6
P53365	ARFP2	1
Q96L14	C170L	1
P0C7T5	ATX1L	1
Q86YS7	C2CD5	2
Q92485	ASM3B	1
Q6ZMN8	CCNI2	1
P08319	ADH4	2
Q96HA4	CA159	1
Q5VVS0	CA140	0
P04118	COL	2
Q02641	CACB1	2
Q86UP0	CAD24	3
Q8N302	AGGF1	4
P01732	CD8A	1
P09693	CD3G	3
P49662	CASP4	2
Q96CP6	ASTRA	2
Q96K78	AGRG7	2
Q5VXM1	CDCP2	2
Q9Y2G3	AT11B	5
Q8IZF5	AGRF3	3
Q8IWK6	AGRA3	6
Q4VNC1	AT134	5
P18825	ADA2C	4
P54709	AT1B3	1
Q9UBD9	CLCF1	2
P51795	CLCN5	2
O95477	ABCA1	3
Q1MSJ5	CSPP1	0
O96018	APBA3	3
Q9H2J1	CI037	0
Q9BSB4	ATGA1	1
Q8NAJ2	CI106	0
Q5T280	CI114	1
Q8WZB0	CI130	0
Q9Y3D0	CIA2B	1
Q9BS18	APC13	1
Q8NFV4	ABHDB	5
O76071	CIAO1	4
Q9GZN8	CT027	1
P0C5K6	CT18	0
Q6DD88	ATLA3	2
P0DMV2	CT459	1
Q8WUE5	CT55	1
P51589	CP2J2	1
Q6ZNF0	ACP7	3
P56381	ATP5E	1
Q9HBJ8	CLTRN	1
Q99766	ATP5S	0
P78329	CP4F2	1
Q08477	CP4F3	1
O94760	DDAH1	1
Q9NSE2	CISH	2
Q17RA5	CMAS1	0
P02655	APOC2	1
P02654	APOC1	1
Q9UJS0	CMC2	5
O75390	CISY	1
Q9BQE5	APOL2	1
O00472	ELL2	2
Q5VZT2	CJ113	1
Q9P2W6	CK021	1
Q9H6J7	CK049	0
A0PK11	CLRN2	0
Q8IYT2	CMTR2	1
Q96LP6	CL042	1
Q5U649	CL060	1
Q15021	CND1	2
Q8NEB7	ACRBP	1
Q9UKU0	ACSL6	2
Q8N3D4	EH1L1	4
P62736	ACTA	1
Q5JTC6	AMER1	1
P19021	AMD	3
P12814	ACTN1	6
Q8IY45	AMN1	2
A7E2S9	A30BL	5
P25940	CO5A3	2
P16220	CREB1	3
O75629	CREG1	1
U3KPV4	A3LT2	1
Q9BYD9	ACTT3	1
P07358	CO8B	3
O15382	BCAT2	1
Q96GX2	A7L3B	0
Q2M3G0	ABCB5	8
Q8N428	GLT16	3
Q96BJ8	ELMO3	3
Q9NZW4	DSPP	0
O95057	DIRA1	3
O95661	DIRA3	3
Q902F9	EN113	3
Q01524	DEF6	2
P08246	ELNE	1
Q8WU03	GLYL2	3
P51452	DUS3	2
Q9Y2G8	DJC16	2
Q5JST6	EFHC2	1
Q96AZ1	EFMT3	1
O60258	FGF17	1
P05230	FGF1	2
A8MTJ3	GNAT3	3
Q30KQ9	DB110	1
Q30KP9	DB135	1
Q30KQ7	DB113	1
Q7Z7B8	DB128	1
O95967	FBLN4	5
O60911	CATL2	3
Q8TER5	ARH40	1
P22003	BMP5	2
Q5MAI5	CDKL4	2
Q12983	BNIP3	1
Q7Z5Y6	BMP8A	2
P07711	CATL1	3
Q6NZI2	CAVN1	1
O95376	ARI2	1
O15013	ARHGA	1
Q969G5	CAVN3	1
Q9BXY5	CAYP2	0
Q53H64	AK40L	0
Q8IVW6	ARI3B	1
A6NDU8	CE051	1
P06731	CEAM5	12
P43353	AL3B1	1
Q8N8D9	CE056	0
Q8NFQ6	BPIFC	2
Q9H8T0	AKTIP	1
O14627	CDX4	2
Q00587	BORG5	2
Q9H2A2	AL8A1	1
Q7KZN9	COX15	1
O95813	CER1	2
Q4V339	CBWD6	2
Q96G23	CERS2	2
O00478	BT3A3	5
Q15041	AR6P1	0
Q6PH81	CP087	1
Q8IYS4	CP071	1
Q8TAB7	CCD26	0
Q7Z6B0	CCD91	0
Q9Y6Q1	CAN6	3
P07384	CAN1	6
Q9BXJ2	C1QT7	2
Q9H1I8	ASCC2	1
Q9UQB9	AURKC	2
O75128	COBL	2
Q8WTP8	AEN	1
Q53FE4	CD017	1
Q5VZK9	CARL1	3
Q9H159	CAD19	3
Q8N4J0	CARME	1
Q13936	CAC1C	5
Q92851	CASPA	2
O43505	B4GA1	1
Q5TA50	CPTP	1
Q8IZM0	CNG1O	0
Q9NR09	BIRC6	4
Q6JBY9	CPZIP	2
Q6UXB4	CLC4G	1
O75531	BAF	1
P17927	CR1	2
Q9ULM6	CNOT6	3
Q9Y2T4	2ABG	0
Q6ZUJ8	BCAP	2
Q86WW8	COA5	1
P22760	AAAD	2
P54108	CRIS3	2
Q13444	ADA15	8
P15144	AMPN	3
P28566	5HT1E	3
O95264	5HT3B	2
Q7Z5M8	AB12B	5
P23582	ANFC	1
Q96SE0	ABHD1	3
Q9ULW3	ABT1	0
Q8N6N7	ACBD7	1
Q8NAG6	ANKL1	6
Q5XXA6	ANO1	2
P23415	GLRA1	2
P49771	FLT3L	1
P43897	EFTS	1
Q49A17	GLTL6	3
Q05639	EF1A2	3
P26378	ELAV4	3
Q96FN9	DTD2	1
P60608	EFC2	1
Q9HA90	EFCC1	1
Q8N9I5	FADS6	1
Q9UNN5	FAF1	2
P49411	EFTU	3
Q9NRM1	ENAM	1
Q05397	FAK1	5
Q8TC99	FNDC8	1
P98173	FAM3A	1
Q8IZU1	FAM9A	0
P49354	FNTA	1
Q8IZU0	FAM9B	1
Q8N5C7	DTWD1	1
P52799	EFNB2	1
Q9UBX2	DUX4	2
P54792	DVLP1	5
P09038	FGF2	1
P08620	FGF4	1
P55075	FGF8	1
Q8N136	DAW1	5
Q53RD9	FBLN7	5
Q8WUF8	F172A	1
Q02985	FHR3	1
Q92874	DNSL2	1
A6NC97	F172B	0
Q9BVA6	FICD	1
O14576	DC1I1	2
Q9Y6G9	DC1L1	1
A6PVY3	F177B	1
Q8TEB1	DCA11	2
Q6PKX4	DOK6	1
Q6P0A1	F180B	1
Q8N9Y4	F181A	1
A6NL82	F183A	1
Q86YN1	DOPP1	1
Q9ULE4	F184B	1
Q8WWB3	DYDC1	1
A8MYV0	DCD2C	1
Q9HCM7	FBSL	1
Q8IYM0	F186B	0
Q0VDD8	DYH14	7
Q17R55	F187B	0
Q9UFH2	DYH17	15
Q86US8	EST1A	3
P0CF97	F200B	0
Q9UK96	FBX10	4
Q9Y238	DLEC1	0
P20036	DPA1	2
Q5JX69	F209B	1
Q7Z6M2	FBX33	2
O00748	EST2	3
Q6PIJ6	FBX38	1
Q8WU58	F222B	1
Q8N4B4	FBX39	1
Q9NRD0	FBX8	2
Q9Y3I1	FBX7	3
Q13627	DYR1A	2
Q96CD0	FBXL8	2
P22681	CBL	8
F5H4A9	CC080	1
P0C7Q2	ARMS2	0
Q8IYK2	CC105	1
A2RUB6	CCD66	1
P0C7U1	ASA2B	1
P15514	AREG	0
Q99616	CCL13	1
O75155	CAND2	6
Q5VWW1	C1QL3	2
Q07021	C1QBP	1
Q9NRJ3	CCL28	1
Q8WXS8	ATS14	8
P32248	CCR7	2
Q9NP86	CABP5	7
P04234	CD3D	2
Q9UMD9	COHA1	1
Q07092	COGA1	1
Q9H3Y0	CRSPL	1
P14209	CD99	1
Q6UUV9	CRTC1	3
P82279	CRUM1	6
Q7Z7M1	AGRD2	4
P18089	ADA2B	4
Q14894	CRYM	4
Q96JP9	CDHR1	1
Q93084	AT2A3	6
Q5T4H9	CSC10	0
P22676	CALB2	5
Q9P1W3	CSC1	3
P20020	AT2B1	7
P06881	CALCA	1
P01258	CALC	1
Q8WUZ0	BCL7C	1
Q16720	AT2B3	7
Q6UXY1	BI2L2	3
Q9H694	BICC1	4
Q9GZS9	CHST5	2
Q9NZS9	BFAR	7
Q12934	BFSP1	1
Q7Z3C6	ATG9A	1
O96019	ACL6A	1
Q9UM13	APC10	1
P60006	APC15	1
Q9NUJ1	ABHDA	4
Q96DE5	APC16	1
P21291	CSRP1	1
Q86TH1	ATL2	3
Q9H0L4	CSTFT	3
Q6UY14	ATL4	3
Q6UW02	CP20A	1
P21399	ACOC	2
Q96AQ7	CIDEC	1
Q96LM9	CT173	0
Q16696	CP2AD	1
P20813	CP2B6	1
Q8WW43	APH1B	1
P51693	APLP1	4
O75964	ATP5L	1
Q8IW19	APLF	2
P56378	ATP68	1
Q6ZWL3	CP4V2	1
Q6NT55	CP4FN	1
Q86W10	CP4Z1	1
P23946	CMA1	1
P10645	CMGA	1
Q8NBR9	CK072	0
Q8N5U0	CK042	1
Q5T742	CJ025	0
Q8IYJ1	CPNE9	2
Q96L46	CPNS2	0
Q96SZ6	CK5P1	3
Q9BQ75	CMS1	2
Q8NA66	CNBD1	1
Q8NCR0	B3GL2	1
Q69YU5	CL073	1
O96024	B3GT4	1
Q9BYD5	CNFN	1
Q8NCF0	CL18C	2
Q9H2X3	CLC4M	5
J3KSC0	CR064	0
Q96CM8	ACSF2	2
P10809	CH60	1
P53672	CRBA2	3
Q7Z7A1	CNTRL	3
Q8N9N5	BANP	1
Q8IXM2	BAP18	0
P02750	A2GL	3
Q5VUR7	A20A3	6
Q9HBU1	BARX1	1
Q99728	BARD1	8
Q96JM3	CHAP1	0
P27658	CO8A1	2
Q02388	CO7A1	8
P20849	CO9A1	1
Q8TDM0	BCAS4	0
Q8WXF5	CRGN	1
P08910	ABHD2	2
P16157	ANK1	8
O00763	ACACB	6
P01019	ANGT	1
Q7Z5J8	ANKAR	6
Q8N9V6	ANR53	5
P20594	ANPRB	4
Q19T08	ECSCR	1
P55039	DRG2	4
Q86SR1	GLT10	3
P59022	DSC10	0
Q7L9B9	EEPD1	4
Q14241	ELOA1	2
Q96SL1	DIRC2	0
Q9NZJ0	DTL	2
Q6IC98	GRAM4	1
Q9NVQ4	FAIM1	1
Q9NW38	FANCL	2
P0CJ89	DU4L6	2
Q9NPI8	FANCF	1
Q0D2K5	EGFEM	0
Q99944	EGFL8	3
Q6NZ36	FAP20	2
O75064	DEN4B	3
Q5TGI0	FAXC	3
Q8TC92	ENOX1	1
P29320	EPHA3	8
O00399	DCTN6	1
Q495B1	AKD1A	5
Q9P2G1	AKIB1	6
O43572	AKA10	1
Q8N960	CE120	2
Q9HC77	CENPJ	1
P17676	CEBPB	1
Q96D53	COQ8B	1
Q9BU64	CENPO	1
P38398	BRCA1	7
Q8N4T8	CBR4	3
Q96BQ5	CC127	0
P15169	CBPN	3
Q9NSI6	BRWD1	3
Q569K6	CC157	0
P0DN79	CBSL	2
P83916	CBX1	2
Q8NFR7	CC148	0
Q15834	CC85B	1
Q6PII3	CC174	1
Q5T5N4	CF118	1
Q6V702	CF299	1
Q8IX12	CCAR1	3
Q13410	BT1A1	7
Q8N6M5	ALLC	1
Q14201	BTG3	1
Q9UBL0	ARP21	2
Q96N11	CG026	1
O60826	CCD22	1
P35612	ADDB	1
P05108	CP11A	1
Q6UB35	C1TM	3
Q9H7T9	AUNIP	1
O75909	CCNK	2
Q8TDN4	CABL1	1
P21854	CD72	1
Q9H257	CARD9	1
P29466	CASP1	2
O95727	CRTAM	6
Q6QNK2	AGRD1	4
A0A140G945	CRYA2	2
Q6UXS9	CASPC	2
O60242	AGRB3	5
Q9UJX2	CDC23	12
Q9H7F0	AT133	6
O60312	AT10A	4
P35218	CAH5A	1
Q9UFG5	CS025	1
Q0VDD7	CS057	1
Q9H6X5	CS044	1
O95490	AGRL2	7
P35523	CLCN1	1
P51793	CLCN4	2
P51800	CLCKA	2
Q13515	BFSP2	1
Q99767	APBA2	3
Q5SZB4	CI050	1
Q8IXQ3	CI040	1
Q8N4C0	CI062	0
Q5T8R8	CI066	1
Q6ZV77	CI139	0
Q5TBE3	CI153	1
P03950	ANGI	1
Q96I13	ABHD8	3
Q9UII2	ATIF1	1
Q96IU4	ABHEB	3
A0PJX0	CIB4	3
Q9BQT9	CSTN3	1
Q16678	CP1B1	1
Q5TEA3	CT194	0
Q6V0L0	CP26C	1
Q8N268	CT197	0
P33261	CP2CJ	1
O00244	ATOX1	1
Q7Z5Q1	CPEB2	3
Q6IBW4	CNDH2	3
Q9NRD9	DUOX1	9
P07741	APT	1
Q86XI2	CNDG2	2
Q9Y5Z6	B3GT1	1
Q96N68	CR015	0
Q9BYG0	B3GN5	2
Q8N812	CL076	1
Q9NXR7	BABA2	1
A2RUQ5	CQ102	0
Q7Z4B0	CR020	0
O00154	BACH	1
Q9BT09	CNPY3	1
Q9UFF9	CNOT8	1
Q9NXG0	CNTLN	0
P0DKL9	A14EL	1
O60306	AQR	5
Q9H8S5	CNTD2	2
Q86WK6	AMGO1	3
Q08043	ACTN3	5
Q6NUI6	CHADL	4
Q16537	2A5E	1
Q9Y6H1	CHCH2	1
P05997	CO5A2	3
Q16520	BATF	3
Q6ZW61	BBS12	1
Q9Y2R0	COA3	1
Q5JTJ3	COA6	1
P23109	AMPD1	1
Q07075	AMPE	3
Q9NRG9	AAAS	0
P47898	5HT5A	3
P28335	5HT2C	4
P16219	ACADS	4
O60678	ANM3	8
Q8TB40	ABHD4	4
P61221	ABCE1	6
O75106	AOC2	3
E5RJM6	ANR65	5
B4E2M5	ANR66	5
Q9Y295	DRG1	4
O75311	GLRA3	2
O75822	EIF3J	1
A6NH11	GLTD2	1
O75530	EED	1
Q68DA7	FMN1	1
Q9UKW6	ELF5	2
Q658K8	EF1DL	0
Q13158	FADD	2
Q9H8H2	DDX31	4
O95163	ELP1	1
P0DPD8	EFCE2	5
O75398	DEAF1	2
O95834	EMAL2	3
Q5UCC4	EMC10	0
O14682	ENC1	8
Q8TDB6	DTX3L	5
Q9H6Z9	EGLN3	2
P34897	GLYM	1
P54852	EMP3	2
P11161	EGR2	4
Q16829	DUS7	2
Q8TC29	ENKUR	1
Q6ZUT9	DEN5B	5
Q5JWF2	GNAS1	2
P36959	GMPR1	1
Q9UN19	DAPP1	2
Q15038	DAZP2	1
P21802	FGFR2	9
O00429	DNM1L	4
Q9Y6K1	DNM3A	3
Q13643	FHL3	1
Q9BXU8	FHL17	1
P35637	FUS	2
P50570	DYN2	5
P43235	CATK	3
A8MZ97	CB074	1
Q8WU43	CB015	1
Q12802	AKP13	4
Q6QEF8	CORO6	4
Q9H0F7	ARL6	6
A6NN90	CB081	1
Q2TAA5	ALG11	3
A8MT69	CENPX	1
Q8IYE0	CC146	0
Q5JPI3	CC038	1
Q96N23	CFA54	1
Q5TEZ5	CF163	0
P0C221	CC175	0
Q5I0X4	CF226	0
P62324	BTG1	1
Q96KE9	BTBD6	3
Q9NRP2	COXM2	1
Q9H7B7	CG069	0
P55789	ALR	1
Q96KT6	CH014	0
Q8N6G5	CGAT2	2
P19099	C11B2	1
Q8IVM0	CCD50	1
Q86VB7	C163A	3
Q7LC44	ARC	1
Q16204	CCDC6	1
O15072	ATS3	9
P02746	C1QB	2
Q53TS8	C2CD6	1
Q9NQS1	AVEN	0
Q8WXX7	AUTS2	1
P07307	ASGR2	2
P54922	ADPRH	1
Q5VT79	AXA81	1
P57730	CAR18	1
P51826	AFF3	1
P15391	CD19	0
Q8TAB5	CA216	1
Q8N4X5	AF1L2	1
Q6ZS62	COLC1	0
Q8NFW1	COMA1	3
Q9UP83	COG5	2
Q8IU53	CASC2	0
Q99459	CDC5L	3
P00915	CAH1	1
Q9HD20	AT131	3
Q9UHX3	AGRE2	8
P04040	CATA	2
K7EIQ3	CS082	0
Q9NR63	CP26B	1
Q9NUB4	CT141	1
Q8NBC4	CT203	1
Q9BR46	CT078	0
O43174	CP26A	1
P27695	APEX1	1
Q96SQ7	ATOH8	1
Q9BZZ5	API5	1
Q9Y6H3	ATP23	1
Q6VVX0	CP2R1	1
P35414	APJ	3
Q9NS75	CLTR2	3
P22680	CP7A1	1
P55056	APOC4	1
Q8WWZ3	EDAD	1
Q9ULV3	CIZ1	1
Q9HB65	ELL3	2
Q5T1B1	CJ091	0
Q7Z7G2	CPLX4	1
P09543	CN37	2
Q96KP4	CNDP2	2
Q67FW5	B3GNL	3
Q8NA57	CL050	2
Q9NQW8	CNGB3	1
O75752	B3GL1	2
Q7Z7M8	B3GN8	1
Q76KP1	B4GN4	2
Q9Y2C3	B3GT5	1
O95817	BAG3	2
Q8WV28	BLNK	1
O95573	ACSL3	2
Q9P232	CNTN3	11
Q99217	AMELX	1
Q8N7J2	AMER2	1
P12110	CO6A2	4
Q9Y4X0	AMMR1	1
Q12873	CHD3	10
Q9NYJ1	COA4	0
P10643	CO7	5
Q00005	2ABB	0
Q03060	CREM	3
Q9BXC9	BBS2	4
Q9Y3L3	3BP1	2
O60756	BCE1	0
P07311	ACYP1	1
Q09472	EP300	7
Q8IUI8	CRLF3	0
Q13451	FKBP5	6
P56851	EP3B	1
Q8IZ07	AN13A	6
Q15007	FL2D	1
P11171	41	6
P50406	5HT6R	1
P41595	5HT2B	4
Q96AK3	ABC3D	11
Q9NP78	ABCB9	2
Q9H222	ABCG5	2
P54098	DPOG1	2
Q9GZV1	ANKR2	5
Q9H8Y5	ANKZ1	6
Q8N283	ANR35	5
Q7Z4W1	DCXR	4
Q9UMR2	DD19B	3
Q9H8V3	ECT2	3
Q008S8	ECT2L	4
O43281	EFS	4
Q92611	EDEM1	1
Q9Y5Y0	FLVC1	1
Q9UBQ5	EIF3K	1
Q9UII6	DS13B	2
Q96Q35	FACC1	0
Q01740	FMO1	6
O60469	DSCAM	17
O95864	FADS2	2
Q8IX07	FOG1	3
Q86Y01	DTX1	3
Q8IZT9	FAM9C	1
Q5TZK3	FAM74	0
Q9NX77	ENK13	2
A0A1W2PPF3	DUXB	2
O95750	FGF19	1
Q13838	DX39B	3
A3KN83	SBNO1	3
Q99884	SC6A7	1
O60749	SNX2	3
Q6ZQN7	SO4C1	3
Q9Y5X3	SNX5	2
P0DL12	SIM17	0
O75159	SOCS5	3
P09936	UCHL1	1
Q8WUA8	TSK	5
Q5SRD0	WAC2D	1
Q9NQA3	WASH6	1
Q9UPE1	SRPK3	2
Q6IEE8	SN12L	1
P17900	SAP3	1
P53794	SC5A3	1
P15907	SIAT1	1
Q8IUQ4	SIAH1	1
Q08945	SSRP1	5
P57059	SIK1	3
P02774	VTDB	2
Q9Y2G9	SBNO2	3
Q8NEF9	SRFB1	1
Q9BQ49	SMIM7	0
P82921	RT21	1
P23297	S10A1	3
Q6NT16	S18B1	3
Q9UNP4	SIAT9	1
Q9BZR6	RTN4R	5
P13866	SC5A1	1
Q9Y5W8	SNX13	4
P59025	RTP1	1
Q9Y5X1	SNX9	5
A6NLU5	VTM2B	3
P59090	TSAS2	0
Q9HAW7	UD17	2
P19075	TSN8	1
O43915	VEGFD	1
A2RRH5	WDR27	2
A8MYJ7	TTC34	0
Q7Z5U6	WDR53	2
Q9Y3V2	RWDD3	1
Q9BRL6	SRSF8	1
O95295	SNAPN	1
Q9UJT2	TSKS	1
P0CW01	TSPYA	1
Q16851	UGPA	1
H0UI37	TSTD3	1
Q9H977	WDR54	0
Q9H6Y2	WDR55	2
Q6PHR2	ULK3	4
Q8TCV5	WFDC5	1
P32241	VIPR1	2
Q8N2C7	UNC80	1
Q6ZRG5	YQ015	1
Q8TAS1	UHMK1	5
P04628	WNT1	1
Q66K41	Z385C	3
Q15836	VAMP3	1
A8MWA4	Z705E	0
P63027	VAMP2	1
Q7L8A9	VASH1	1
Q9HCJ6	VAT1L	3
Q6EMK4	VASN	4
Q9UJN7	ZN391	0
Q9NW07	ZN358	0
Q9GZT5	WN10A	1
Q96GY0	ZC21A	1
Q8N9F8	ZN454	0
Q96GR4	ZDH12	1
Q96GT9	XAGE2	1
Q9H609	ZN576	5
Q96K83	ZN521	6
Q8WTX9	ZDHC1	1
Q8IZN3	ZDH14	1
Q96NL3	ZN599	11
O00488	ZN593	1
Q86UK7	ZN598	0
Q9ULC8	ZDHC8	1
Q6ZS27	ZN662	0
P19320	VCAM1	15
P17019	ZN708	0
Q6ZNC4	ZN704	0
Q5HY98	ZN766	0
Q9H8U3	ZFAN3	2
Q9HCL3	ZFP14	0
Q9UK55	ZPI	1
A8MXY4	ZNF99	0
Q9UDW3	ZMAT5	3
Q19AV6	ZSWM7	1
Q5FWF4	ZRAB3	5
O95201	ZN205	0
P52744	ZN138	0
Q9NYT6	ZN226	0
Q9H267	VP33B	1
P21754	ZP3	1
Q06732	ZN33B	0
Q9Y6I0	VPK6	2
Q9BYN7	ZN341	5
Q9HCZ1	ZN334	0
Q9HBT7	ZN287	0
Q8IYH5	ZZZ3	3
A1L4H1	SRCRL	2
A0A1B0GWG4	SRTM2	1
Q9Y291	RT33	1
O43805	SSNA1	0
Q76I76	SSH2	2
Q9H1Z9	TSN10	1
Q5TIE3	VW5B1	4
P54855	UDB15	2
Q9HBX9	RXFP1	6
Q14162	SREC	2
H3BR10	SMLR1	0
Q96EL2	RT24	1
Q6GMV2	SMYD5	1
Q99954	SMR3A	1
P0C264	SBK3	2
O15079	SNPH	1
Q96NG3	TTC25	0
O75083	WDR1	4
Q7Z5K2	WAPL	1
Q16473	TENXA	2
Q9P1V8	SAM15	2
P33763	S10A5	1
Q96A09	TET5B	1
Q9Y676	RT18B	1
A2A2V5	SRTM1	1
Q8TE77	SSH3	2
Q9BWG4	SSBP4	1
Q9NZ71	RTEL1	3
P08621	RU17	2
Q96PQ1	SIG12	6
Q8N7X8	SIGL1	0
P35503	UD13	2
Q3SY77	UD3A2	2
Q86WT1	TT30A	0
Q2TAL6	VWC2	1
Q969T9	WBP2	1
Q5R3I4	TTC38	0
Q14587	ZN268	0
O75820	ZN189	0
A8MTB9	CEA18	0
A8MTT3	CEBOS	0
Q9Y243	AKT3	5
P55273	CDN2D	5
P51861	CDR1	0
Q9Y5P4	CERT	3
P00403	COX2	2
A0A096LP49	CC187	0
Q96GE4	CEP95	0
Q9Y6Z2	CF123	0
P00746	CFAD	3
Q9UIR0	BTNL2	6
Q4G0S7	CC152	0
Q7Z6A9	BTLA	0
Q8N1V2	CFA52	2
Q7KYR7	BT2A1	5
O15511	ARPC5	1
Q49A92	CH034	1
Q6NSX1	CCD70	0
O15444	CCL25	1
P00325	ADH1B	2
O15033	AREL1	2
Q9Y575	ASB3	6
P07550	ADRB2	5
Q9Y6J0	CABIN	3
Q99440	CD006	0
Q9BXK5	B2L13	1
Q9NNX6	CD209	4
Q8N668	COMD1	2
Q86T23	CROL1	0
P60953	CDC42	3
Q9Y653	AGRG1	4
P20749	BCL3	5
Q6RUI8	CS048	1
Q9HAR2	AGRL3	7
P22914	CRYGS	2
C9J6K1	CS081	1
Q9NUZ1	ACOXL	3
O15254	ACOX3	3
O95865	DDAH2	0
O00303	EIF3F	2
Q13347	EIF3I	2
A0A1W2PPM1	CPHXL	1
Q9BWW8	APOL6	1
Q53HC9	EIPR1	1
Q8WZ69	CK040	1
Q8IXP5	CK053	1
Q96FN4	CPNE2	2
Q9HCH3	CPNE5	2
O95741	CPNE6	2
C9JLR9	CK095	2
Q7Z7L8	CK096	1
Q96S95	CK2N2	1
Q9NPZ5	B3GA2	1
O94766	B3GA3	1
Q9NY97	B3GN2	1
O15392	BIRC5	1
Q15417	CNN3	2
G3V211	CL079	0
Q96LI5	CNO6L	3
O60909	B4GT2	2
Q9Y5Z0	BACE2	3
P53674	CRBB1	2
Q96HD1	CREL1	2
P14621	ACYP2	1
Q7L8J4	3BP5L	1
P50238	CRIP1	1
Q9H336	CRLD1	2
O75462	CRLF1	4
P35368	ADA1B	4
P31937	3HIDH	4
O75923	DYSF	5
Q9BXI3	5NT1A	1
Q96P26	5NT1B	1
O75027	ABCB7	2
Q9P2R3	ANFY1	7
Q96BM1	ANKR9	0
Q68DC2	ANKS6	7
Q8N8A2	ANR44	5
A6NF34	ANTRL	3
Q5FVE4	ACBG2	1
Q9UJ72	ANX10	1
O75179	ANR17	6
Q9H845	ACAD9	4
P08133	ANXA6	1
P60228	EIF3E	2
P12724	ECP	1
Q6PGQ1	DRIC1	0
O15372	EIF3H	1
O75955	FLOT1	2
Q08345	DDR1	3
Q96K12	FACR2	7
P0DPQ6	DT3UO	0
Q9NUL7	DDX28	2
Q05BV3	EMAL5	5
Q8TE67	ES8L3	5
Q96A84	EMID1	2
O15360	FANCA	2
Q9NVM6	DJC17	2
Q8N6R0	EFNMT	8
P41567	EIF1	1
P98172	EFNB1	1
Q92913	FGF13	1
P31371	FGF9	1
Q4QY38	DB134	1
Q9UBU7	DBF4A	2
Q92496	FHR4	1
Q8NF50	DOCK8	3
Q92782	DPF1	2
Q6PJ61	FBX46	2
P21217	FUT3	2
P12318	FCG2A	7
Q86Y13	DZIP3	6
A6NHR8	FA47D	1
O75072	FKTN	1
Q9BQS8	FYCO1	2
Q9BTE7	DCNL5	1
P42566	EPS15	4
O60478	G137B	0
P49005	DPOD2	2
Q6UWM5	GPRL1	1
P14207	FOLR2	1
Q16610	ECM1	1
Q6ZUU3	FOXNB	0
P0CZ25	D10OS	0
H3BQW9	F229A	1
P0C7W9	F90AE	1
Q6ISB3	GRHL2	1
P16118	F261	3
P27539	GDF1	1
Q9ULK0	GRID1	4
Q96KD3	F71F1	1
A0FGR8	ESYT2	2
P35573	GDE	4
Q8IXL6	FA20C	1
Q16099	GRIK4	4
O95571	ETHE1	1
Q9NZY2	FA30A	0
Q8N2R8	FA43A	1
Q6ZVF9	GRIN3	1
Q9Y421	FA32A	1
Q9NUQ9	FA49B	1
Q96GE9	DMAC1	1
Q9Y247	FA50B	1
P32298	GRK4	4
P41212	ETV6	2
P28068	DMB	4
Q96LP2	FA81B	0
Q14416	GRM2	3
P28799	GRN	1
Q7L5L3	GDPD3	1
P38646	GRP75	3
Q6NXP2	F71F2	1
O95390	GDF11	2
Q5RGS3	F74A1	0
Q9Y5R5	DMRT2	1
P57679	EVC	0
Q6ZNA5	FRRS1	3
Q9UF47	DNJ5B	1
Q9BYH1	SE6L1	3
Q92736	RYR2	9
P41732	TSN7	1
Q6PID6	TTC33	0
Q01534	TSPY1	1
Q4G0T1	SRCRM	3
Q96DX4	RSPRY	2
Q9Y2Q9	RT28	1
A6NNA2	SRRM3	2
P62079	TSN5	1
Q12768	WASC5	1
P49746	TSP3	5
Q86TZ1	TTC6	15
Q6SZW1	SARM1	4
Q96SB4	SRPK1	2
P61278	SMS	1
Q8TBZ3	WDR20	3
Q9Y2I8	WDR37	1
P98169	ZXDB	6
Q9UH36	SRR1L	1
P55735	SEC13	2
Q9Y5M8	SRPRB	5
Q8IYX7	SAXO1	0
Q9H3U7	SMOC2	4
P04271	S100B	2
Q9BSG5	RTBDN	1
Q8NDV1	SIA7C	1
Q8N8Z8	ZN441	0
Q8NAP8	ZBT8B	4
O60293	ZC3H1	0
Q9NWS9	ZN446	3
Q6S9Z5	ZN474	1
Q9P1C3	YN010	0
Q96CX3	ZN501	0
Q9Y3S2	ZN330	1
Q9UK12	ZN222	0
Q9UHW9	S12A6	2
Q8IVN8	SBSPO	1
O75396	SC22B	2
Q9Y5W9	SNX11	1
Q9NPD5	SO1B3	3
Q96T51	RUFY1	2
P0DMW4	SIL2A	1
Q9Y2K2	SIK3	3
Q9HAW8	UD110	2
O60636	TSN2	1
P07996	TSP1	4
Q9UPY6	WASF3	1
O43151	TET3	2
Q9NQW1	SC31B	0
Q96DI7	SNR40	3
Q4G0G5	SC2B2	1
A0A0B4J2F2	SIK1B	3
Q96RF0	SNX18	5
A8MXK1	VSTM5	0
Q8IX04	UEVLD	3
P0C672	TSN19	1
Q9UP95	S12A4	2
Q86VE3	SATL1	1
Q9Y3I0	RTCB	1
Q6ZR62	RTL4	0
O94855	SC24D	5
Q8TER0	SNED1	6
Q8WWT9	S13A3	2
P09234	RU1C	1
O43699	SIGL6	6
Q9BVN2	RUSC1	4
P58557	YBEY	1
Q0VG73	YC023	0
Q9UHD9	UBQL2	4
Q9NRR5	UBQL4	3
Q9HAC8	UBTD1	3
Q5T124	UBX11	2
Q63HK5	TSH3	0
A6NKD2	TSPY2	1
A2RU30	TESP1	1
Q8NCR6	SMRP1	1
P10124	SRGN	1
P05109	S10A8	1
Q9H4L7	SMRCD	5
A6NIM6	S15A5	1
B1AK76	SNUFL	1
Q9BST9	RTKN	2
Q8IZ73	RUSD2	1
O95219	SNX4	1
Q3KNW5	SOAT	1
Q96FS4	SIPA1	2
P01241	SOMA	1
O94964	SOGA1	2
A6NCW7	U17L4	2
P98170	XIAP	3
O95070	YIF1A	2
Q2TAM9	TUSC1	0
A2RUG3	XKRY2	1
Q13454	TUSC3	1
Q5TAX3	TUT4	3
P0C879	YJ018	0
Q92889	XPF	1
A0A0B4J249	TVA5	1
Q86TS7	U730	1
A0A578	TVB51	1
A0A0C4DH59	TVB54	1
A0A597	TVB55	1
Q6ZSR9	YJ005	1
Q702N8	XIRP1	1
Q9BW85	YJU2	1
A8MPS7	YDJC	1
P0CG47	UBB	9
Q9BRU9	UTP23	1
Q969X6	UTP4	0
O15205	UBD	3
Q86XW9	TXND6	2
O14604	TYB4Y	1
Q6ZS52	YF013	0
Q9H0E7	UBP44	3
Q04323	UBXN1	2
O95847	UCP4	1
[truncated: 18,314 more rows]
