# Supplementary material
Source: publisher figshare collection journal article supplement (https://gsajournals.figshare.com/articles/dataset/_/19782502)

Supplementary Figure 2.

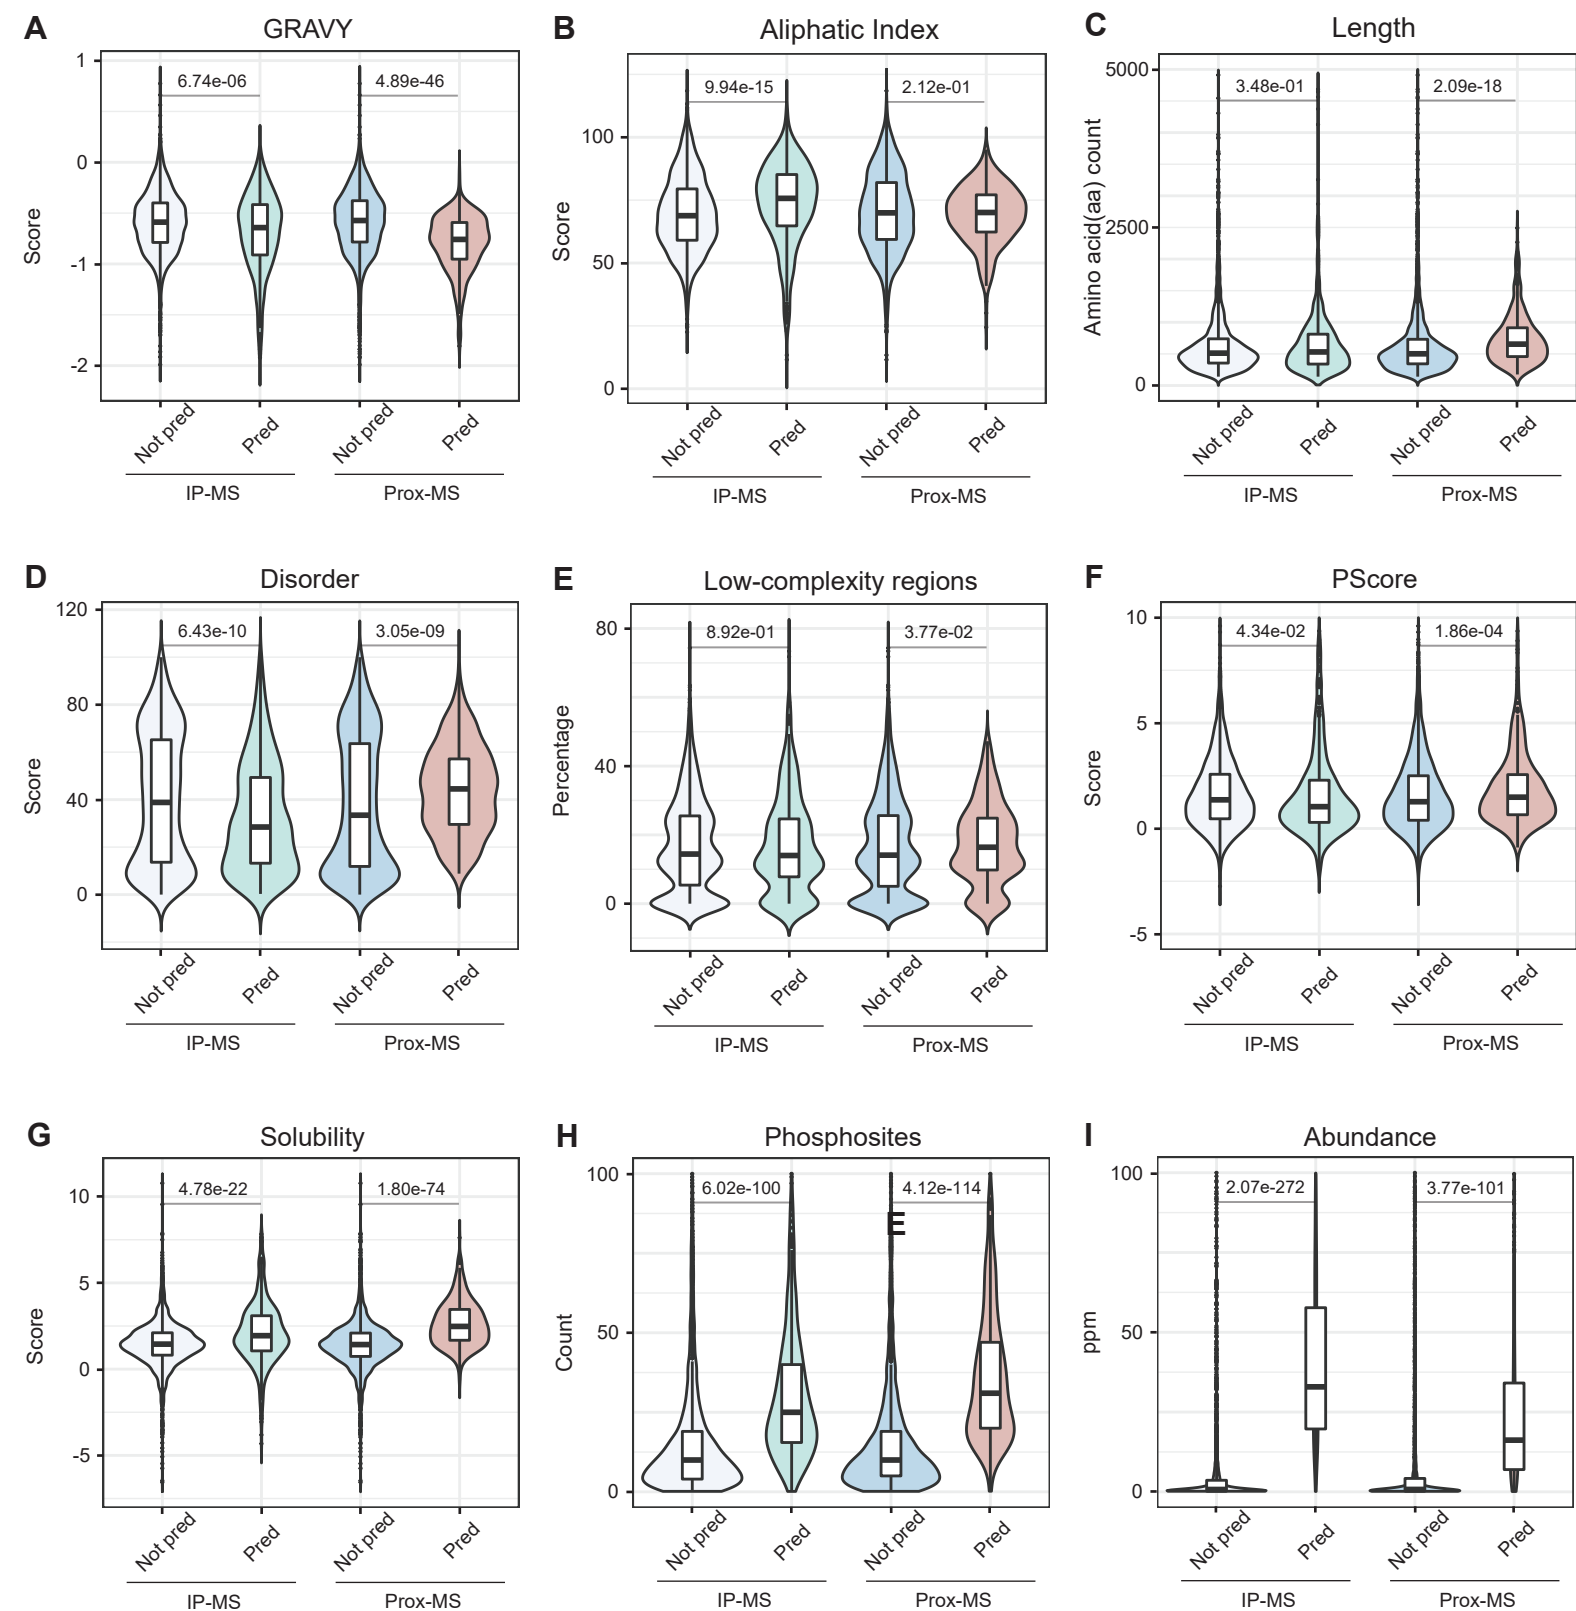

Supplement: Supplementary file 1 [file 1]

Supplemental Figure 3.

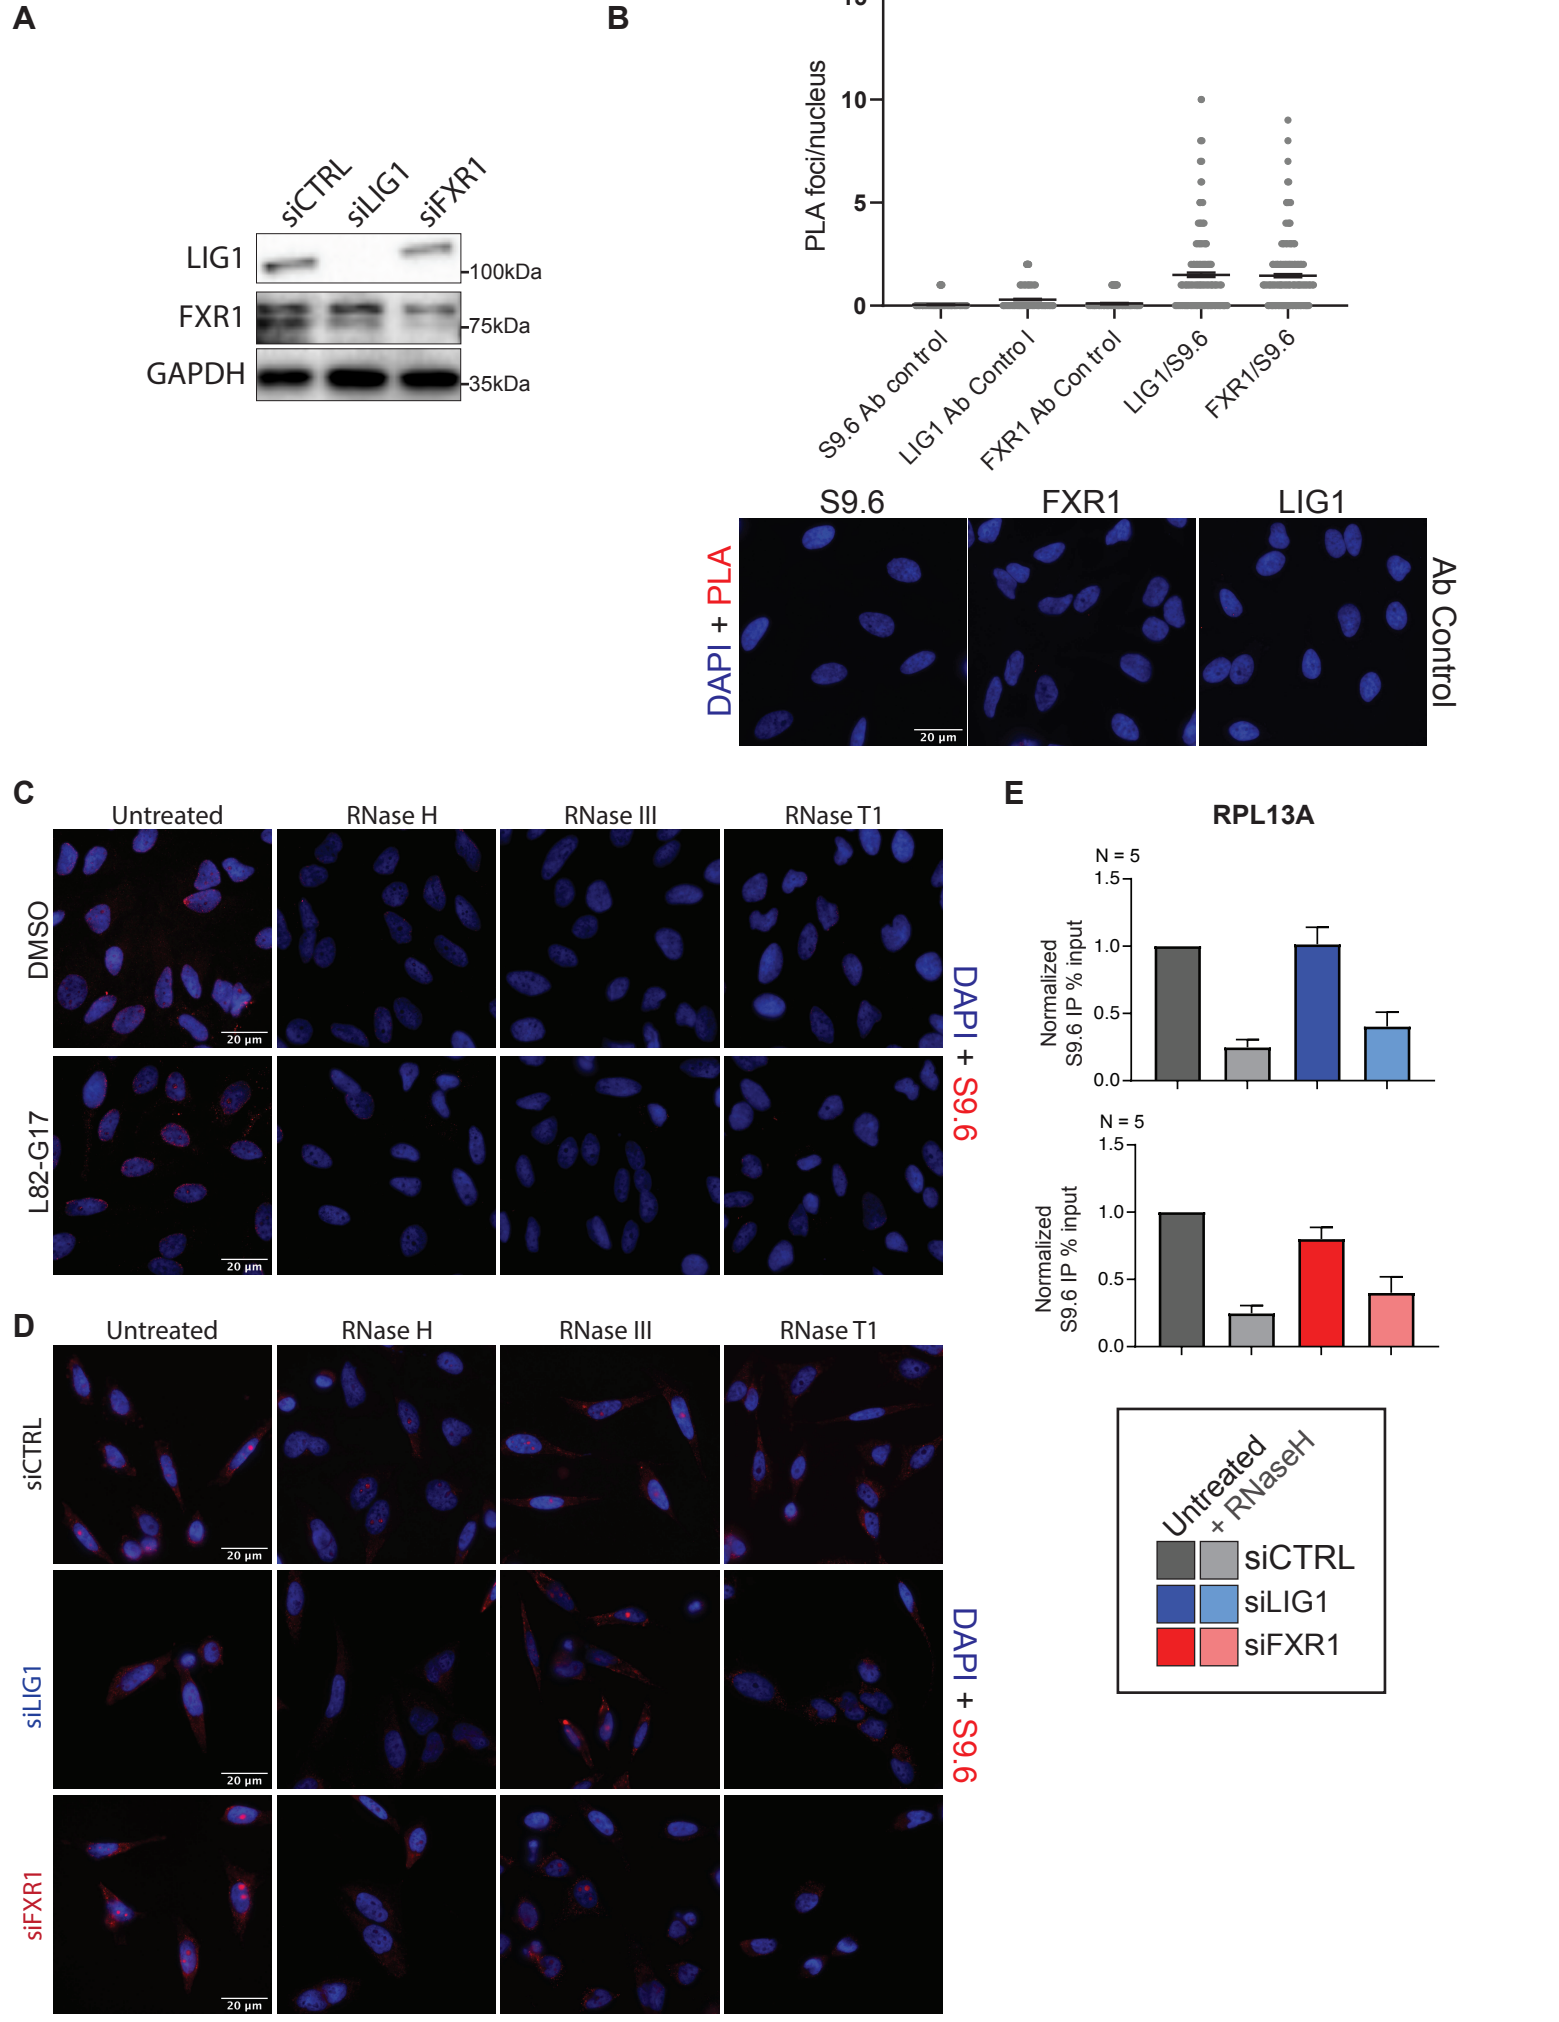

Supplement: Supplementary file 2 [file 1]

Supplementary Figure 1.

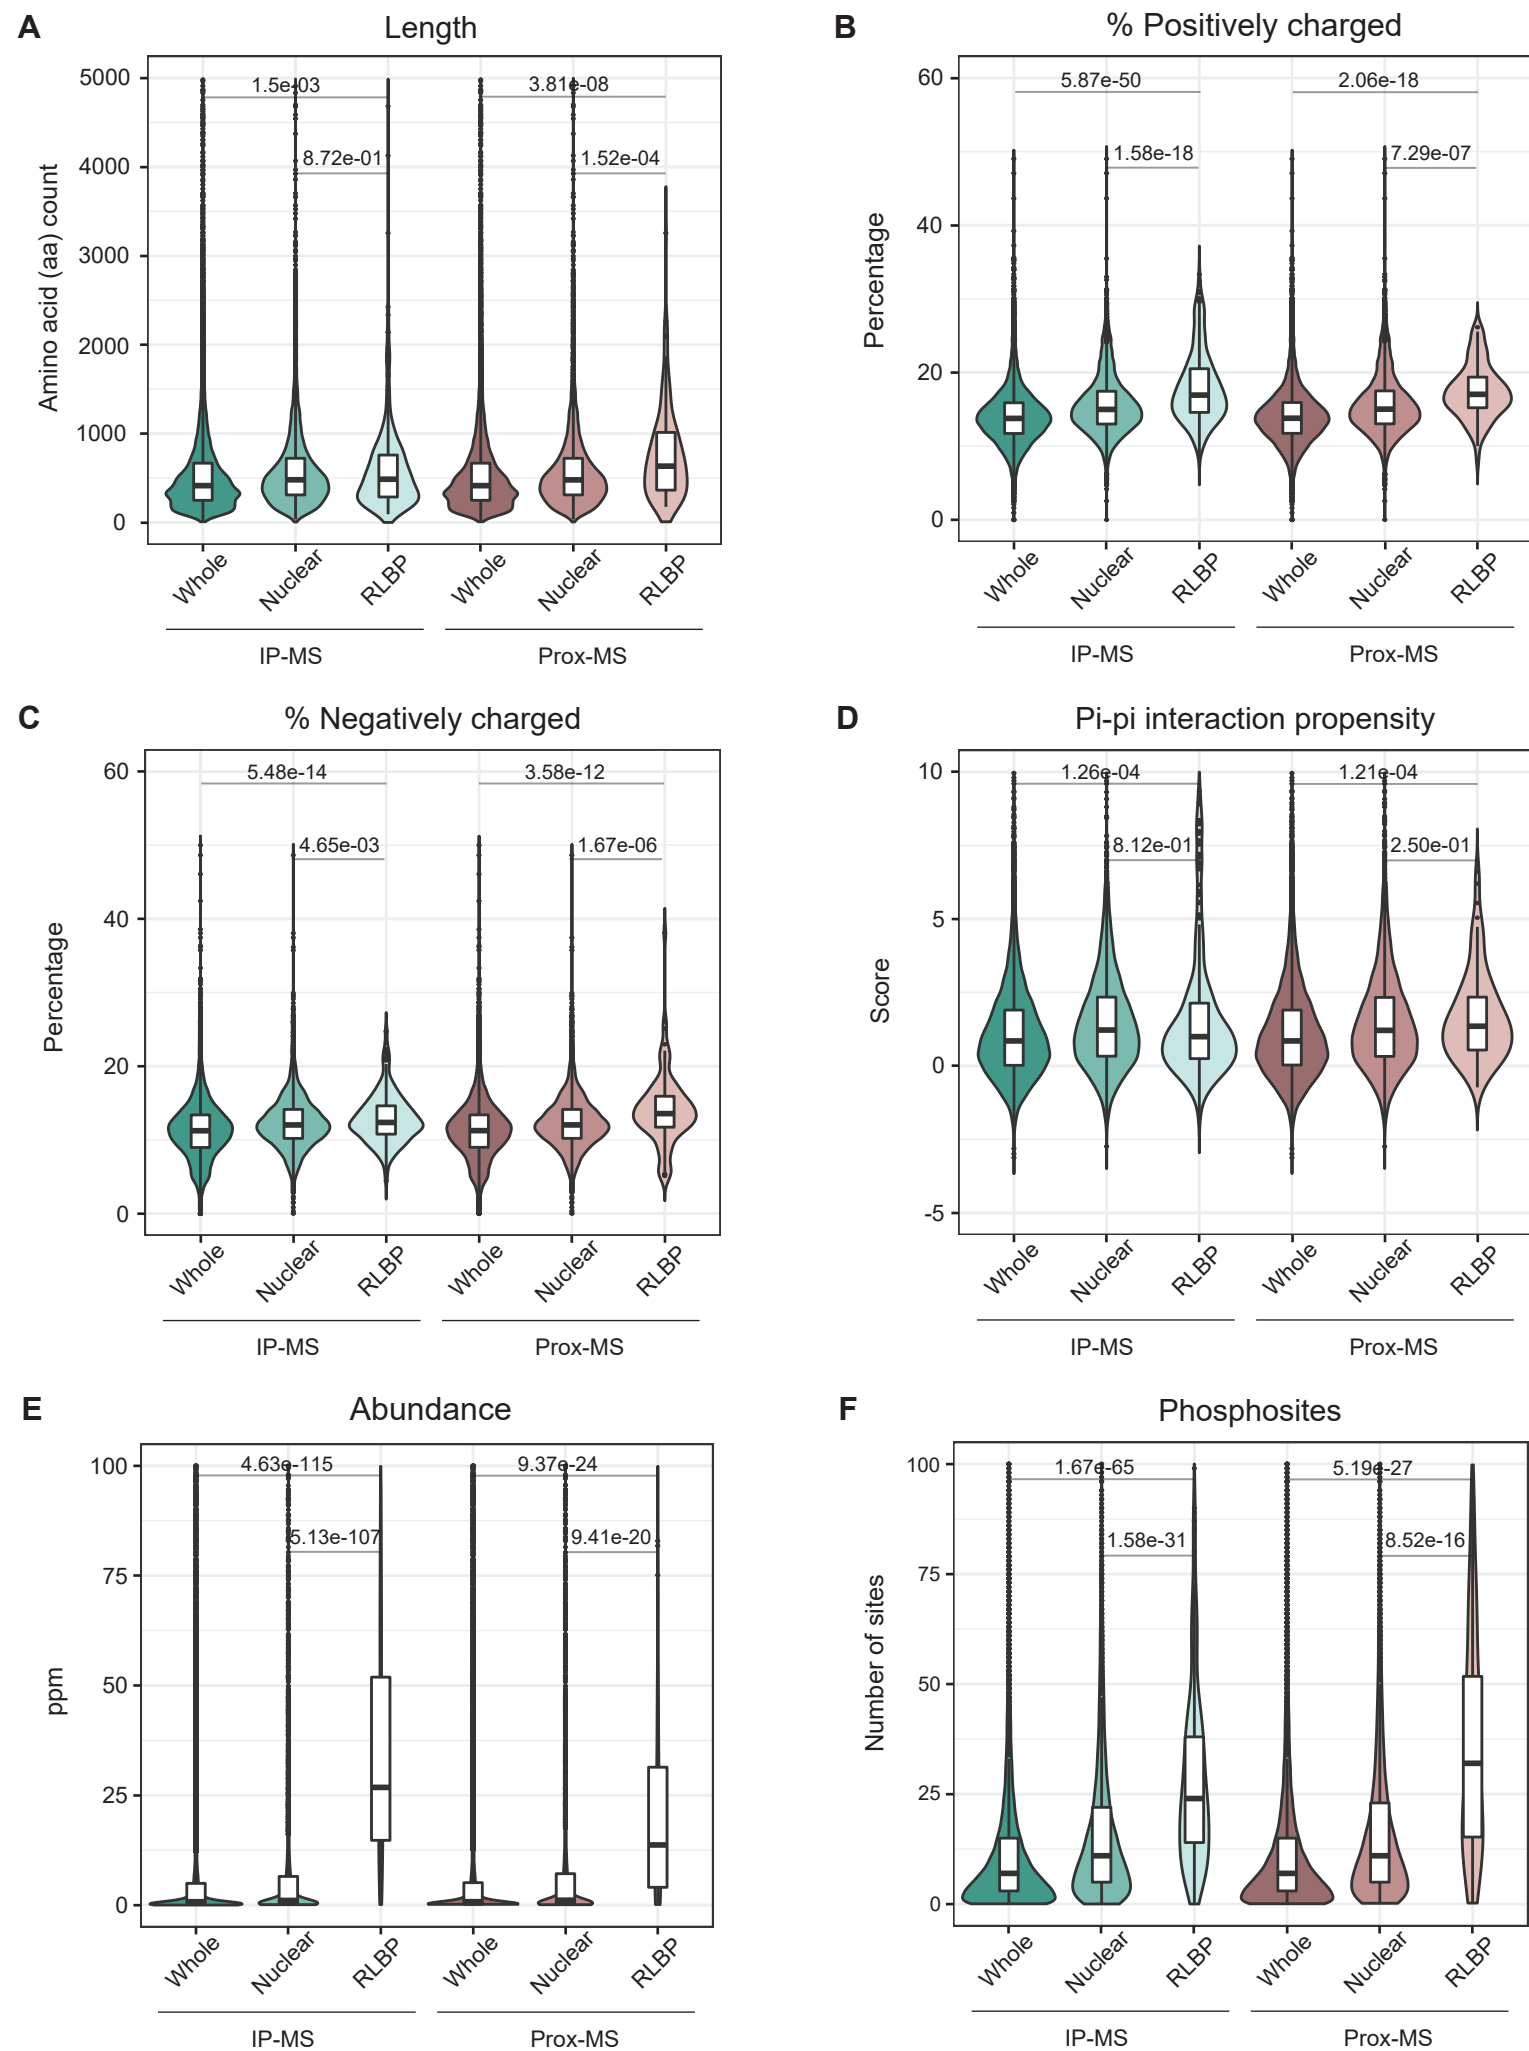

Supplement: Supplementary file 3 [file 1]
